# Supplementary material for: Preparation of Polyamide 6/CeO2 Composite Nanofibers through Electrospinning for Biomedical Applications
Source: Hindawi journal article supplement (doi:10.1155/2019/2494586), 2019-12-11
Supplement: f1 [file 2494586.f1.doc]

Supplementary information

Outline

[Fig.1 FT-IR spectroscopy of (a) unmodified CeO2 and (b) modified CeO2 with coupling agent KH550 1](#__RefHeading___Toc14946928)

[Fig. 3 XRD patterns of PA6/CeO2 composite fibers with the different concentration of CeO2 （a）0wt.% （b）3wt.% （c）5wt.% （d）7wt.% （e）9wt.% 44](#__RefHeading___Toc14946929)

[Fig.4 Tensile properties of PA6/CeO2 composite fibers with the different concentration of CeO2 169](#__RefHeading___Toc14946930)

[Fig.5 Cell growth measurement on (a) macrophages and (b) osteoblasts of electrospun PA6/ CeO2 nanofibers with different CeO2 concentration of 0 wt.%, 3 wt.%, 5 wt.%, 7 wt.% and 9 wt.%. 170](#__RefHeading___Toc14946931)

Fig.1 FT-IR spectroscopy of (a) unmodified CeO2 and (b) modified CeO2 with coupling agent KH550

| Wave number(cm-1) | Transmittance/% | Wave number(cm-1) | Transmittance/% |
| --- | --- | --- | --- |
| 3996.35772 | 0.99962 | 3996.35772 | 1.00026 |
| 3994.42898 | 0.99969 | 3994.42898 | 1.00032 |
| 3992.50023 | 0.99975 | 3992.50023 | 1.00037 |
| 3990.57149 | 0.9998 | 3990.57149 | 1.00041 |
| 3988.64274 | 0.99984 | 3988.64274 | 1.00044 |
| 3986.714 | 0.99988 | 3986.714 | 1.00045 |
| 3984.78526 | 0.9999 | 3984.78526 | 1.00047 |
| 3982.85651 | 0.99991 | 3982.85651 | 1.00047 |
| 3980.92777 | 0.99992 | 3980.92777 | 1.00046 |
| 3978.99902 | 0.99991 | 3978.99902 | 1.00044 |
| 3977.07028 | 0.9999 | 3977.07028 | 1.00041 |
| 3975.14154 | 0.99988 | 3975.14154 | 1.00038 |
| 3973.21279 | 0.99985 | 3973.21279 | 1.00033 |
| 3971.28405 | 0.9998 | 3971.28405 | 1.00028 |
| 3969.3553 | 0.99975 | 3969.3553 | 1.00022 |
| 3967.42656 | 0.99969 | 3967.42656 | 1.00014 |
| 3965.49782 | 0.99962 | 3965.49782 | 1.00006 |
| 3963.56907 | 0.99955 | 3963.56907 | 0.99997 |
| 3961.64033 | 0.99946 | 3961.64033 | 0.99987 |
| 3959.71158 | 0.99936 | 3959.71158 | 0.99976 |
| 3957.78284 | 0.99925 | 3957.78284 | 0.99964 |
| 3955.8541 | 0.99915 | 3955.8541 | 0.99949 |
| 3953.92535 | 0.9989 | 3953.92535 | 0.99922 |
| 3951.99661 | 0.9986 | 3951.99661 | 0.99892 |
| 3950.06786 | 0.99832 | 3950.06786 | 0.99864 |
| 3948.13912 | 0.99813 | 3948.13912 | 0.99847 |
| 3946.21038 | 0.99813 | 3946.21038 | 0.99847 |
| 3944.28163 | 0.9983 | 3944.28163 | 0.99863 |
| 3942.35289 | 0.99848 | 3942.35289 | 0.99877 |
| 3940.42414 | 0.99851 | 3940.42414 | 0.99874 |
| 3938.4954 | 0.99832 | 3938.4954 | 0.99851 |
| 3936.56665 | 0.99791 | 3936.56665 | 0.99809 |
| 3934.63791 | 0.99746 | 3934.63791 | 0.99767 |
| 3932.70917 | 0.99718 | 3932.70917 | 0.99741 |
| 3930.78042 | 0.99697 | 3930.78042 | 0.99719 |
| 3928.85168 | 0.99667 | 3928.85168 | 0.99688 |
| 3926.92293 | 0.99642 | 3926.92293 | 0.99663 |
| 3924.99419 | 0.99625 | 3924.99419 | 0.99648 |
| 3923.06545 | 0.99603 | 3923.06545 | 0.99625 |
| 3921.1367 | 0.9958 | 3921.1367 | 0.99603 |
| 3919.20796 | 0.99556 | 3919.20796 | 0.99581 |
| 3917.27921 | 0.99521 | 3917.27921 | 0.99547 |
| 3915.35047 | 0.99494 | 3915.35047 | 0.99519 |
| 3913.42173 | 0.99482 | 3913.42173 | 0.99506 |
| 3911.49298 | 0.99476 | 3911.49298 | 0.99498 |
| 3909.56424 | 0.99464 | 3909.56424 | 0.99485 |
| 3907.63549 | 0.99439 | 3907.63549 | 0.99459 |
| 3905.70675 | 0.99407 | 3905.70675 | 0.99428 |
| 3903.77801 | 0.99378 | 3903.77801 | 0.994 |
| 3901.84926 | 0.99345 | 3901.84926 | 0.99366 |
| 3899.92052 | 0.99311 | 3899.92052 | 0.99331 |
| 3897.99177 | 0.9929 | 3897.99177 | 0.99308 |
| 3896.06303 | 0.99294 | 3896.06303 | 0.99312 |
| 3894.13429 | 0.99319 | 3894.13429 | 0.99335 |
| 3892.20554 | 0.9932 | 3892.20554 | 0.99329 |
| 3890.2768 | 0.99268 | 3890.2768 | 0.9927 |
| 3888.34805 | 0.99206 | 3888.34805 | 0.99203 |
| 3886.41931 | 0.99156 | 3886.41931 | 0.99153 |
| 3884.49056 | 0.99125 | 3884.49056 | 0.99124 |
| 3882.56182 | 0.99114 | 3882.56182 | 0.99114 |
| 3880.63308 | 0.99112 | 3880.63308 | 0.9911 |
| 3878.70433 | 0.99112 | 3878.70433 | 0.99106 |
| 3876.77559 | 0.99103 | 3876.77559 | 0.99092 |
| 3874.84684 | 0.99087 | 3874.84684 | 0.99069 |
| 3872.9181 | 0.99076 | 3872.9181 | 0.99053 |
| 3870.98936 | 0.99074 | 3870.98936 | 0.99044 |
| 3869.06061 | 0.99073 | 3869.06061 | 0.99036 |
| 3867.13187 | 0.99064 | 3867.13187 | 0.99021 |
| 3865.20312 | 0.99039 | 3865.20312 | 0.98992 |
| 3863.27438 | 0.99013 | 3863.27438 | 0.98964 |
| 3861.34564 | 0.99004 | 3861.34564 | 0.98955 |
| 3859.41689 | 0.99002 | 3859.41689 | 0.98949 |
| 3857.48815 | 0.99004 | 3857.48815 | 0.98948 |
| 3855.5594 | 0.99012 | 3855.5594 | 0.98952 |
| 3853.63066 | 0.98995 | 3853.63066 | 0.98929 |
| 3851.70192 | 0.98964 | 3851.70192 | 0.98896 |
| 3849.77317 | 0.9896 | 3849.77317 | 0.98895 |
| 3847.84443 | 0.9898 | 3847.84443 | 0.98916 |
| 3845.91568 | 0.98998 | 3845.91568 | 0.98933 |
| 3843.98694 | 0.99016 | 3843.98694 | 0.98949 |
| 3842.0582 | 0.99046 | 3842.0582 | 0.98977 |
| 3840.12945 | 0.99075 | 3840.12945 | 0.99003 |
| 3838.20071 | 0.99101 | 3838.20071 | 0.99026 |
| 3836.27196 | 0.99125 | 3836.27196 | 0.99049 |
| 3834.34322 | 0.99134 | 3834.34322 | 0.9906 |
| 3832.41447 | 0.99123 | 3832.41447 | 0.99055 |
| 3830.48573 | 0.99109 | 3830.48573 | 0.9905 |
| 3828.55699 | 0.99114 | 3828.55699 | 0.99065 |
| 3826.62824 | 0.99137 | 3826.62824 | 0.99095 |
| 3824.6995 | 0.99162 | 3824.6995 | 0.99125 |
| 3822.77075 | 0.99196 | 3822.77075 | 0.99164 |
| 3820.84201 | 0.99249 | 3820.84201 | 0.99224 |
| 3818.91327 | 0.99306 | 3818.91327 | 0.99284 |
| 3816.98452 | 0.99326 | 3816.98452 | 0.99306 |
| 3815.05578 | 0.99295 | 3815.05578 | 0.99276 |
| 3813.12703 | 0.99265 | 3813.12703 | 0.99255 |
| 3811.19829 | 0.993 | 3811.19829 | 0.99303 |
| 3809.26955 | 0.99371 | 3809.26955 | 0.9938 |
| 3807.3408 | 0.99435 | 3807.3408 | 0.99446 |
| 3805.41206 | 0.99481 | 3805.41206 | 0.99489 |
| 3803.48331 | 0.99509 | 3803.48331 | 0.99514 |
| 3801.55457 | 0.99521 | 3801.55457 | 0.99525 |
| 3799.62583 | 0.99527 | 3799.62583 | 0.99532 |
| 3797.69708 | 0.99535 | 3797.69708 | 0.99542 |
| 3795.76834 | 0.99552 | 3795.76834 | 0.99563 |
| 3793.83959 | 0.99586 | 3793.83959 | 0.99601 |
| 3791.91085 | 0.99641 | 3791.91085 | 0.9966 |
| 3789.98211 | 0.99699 | 3789.98211 | 0.99716 |
| 3788.05336 | 0.99727 | 3788.05336 | 0.99738 |
| 3786.12462 | 0.99743 | 3786.12462 | 0.99752 |
| 3784.19587 | 0.99753 | 3784.19587 | 0.99758 |
| 3782.26713 | 0.99709 | 3782.26713 | 0.99711 |
| 3780.33838 | 0.99639 | 3780.33838 | 0.99643 |
| 3778.40964 | 0.99594 | 3778.40964 | 0.99606 |
| 3776.4809 | 0.99578 | 3776.4809 | 0.99596 |
| 3774.55215 | 0.99583 | 3774.55215 | 0.99607 |
| 3772.62341 | 0.99578 | 3772.62341 | 0.99603 |
| 3770.69466 | 0.99533 | 3770.69466 | 0.99559 |
| 3768.76592 | 0.99459 | 3768.76592 | 0.99487 |
| 3766.83718 | 0.99387 | 3766.83718 | 0.99421 |
| 3764.90843 | 0.99325 | 3764.90843 | 0.99366 |
| 3762.97969 | 0.99244 | 3762.97969 | 0.9929 |
| 3761.05094 | 0.99147 | 3761.05094 | 0.992 |
| 3759.1222 | 0.99056 | 3759.1222 | 0.99118 |
| 3757.19346 | 0.98966 | 3757.19346 | 0.99036 |
| 3755.26471 | 0.98892 | 3755.26471 | 0.98969 |
| 3753.33597 | 0.98856 | 3753.33597 | 0.98938 |
| 3751.40722 | 0.98847 | 3751.40722 | 0.98929 |
| 3749.47848 | 0.98831 | 3749.47848 | 0.98908 |
| 3747.54974 | 0.98791 | 3747.54974 | 0.98865 |
| 3745.62099 | 0.98747 | 3745.62099 | 0.98819 |
| 3743.69225 | 0.98718 | 3743.69225 | 0.9879 |
| 3741.7635 | 0.98704 | 3741.7635 | 0.98773 |
| 3739.83476 | 0.98688 | 3739.83476 | 0.98752 |
| 3737.90602 | 0.9868 | 3737.90602 | 0.98736 |
| 3735.97727 | 0.98693 | 3735.97727 | 0.98741 |
| 3734.04853 | 0.98722 | 3734.04853 | 0.98761 |
| 3732.11978 | 0.9876 | 3732.11978 | 0.98789 |
| 3730.19104 | 0.9881 | 3730.19104 | 0.98829 |
| 3728.26229 | 0.98859 | 3728.26229 | 0.98867 |
| 3726.33355 | 0.98888 | 3726.33355 | 0.98884 |
| 3724.40481 | 0.98913 | 3724.40481 | 0.98901 |
| 3722.47606 | 0.98953 | 3722.47606 | 0.98936 |
| 3720.54732 | 0.99006 | 3720.54732 | 0.9898 |
| 3718.61857 | 0.99077 | 3718.61857 | 0.99044 |
| 3716.68983 | 0.99179 | 3716.68983 | 0.99135 |
| 3714.76109 | 0.99273 | 3714.76109 | 0.99214 |
| 3712.83234 | 0.99308 | 3712.83234 | 0.99233 |
| 3710.9036 | 0.99317 | 3710.9036 | 0.99234 |
| 3708.97485 | 0.9934 | 3708.97485 | 0.99254 |
| 3707.04611 | 0.99336 | 3707.04611 | 0.99248 |
| 3705.11737 | 0.993 | 3705.11737 | 0.99213 |
| 3703.18862 | 0.99289 | 3703.18862 | 0.99207 |
| 3701.25988 | 0.99309 | 3701.25988 | 0.99234 |
| 3699.33113 | 0.99324 | 3699.33113 | 0.99252 |
| 3697.40239 | 0.99315 | 3697.40239 | 0.99245 |
| 3695.47365 | 0.99286 | 3695.47365 | 0.9922 |
| 3693.5449 | 0.99262 | 3693.5449 | 0.99202 |
| 3691.61616 | 0.99279 | 3691.61616 | 0.99226 |
| 3689.68741 | 0.99334 | 3689.68741 | 0.99284 |
| 3687.75867 | 0.99367 | 3687.75867 | 0.99314 |
| 3685.82993 | 0.99343 | 3685.82993 | 0.99288 |
| 3683.90118 | 0.99292 | 3683.90118 | 0.99241 |
| 3681.97244 | 0.9925 | 3681.97244 | 0.99207 |
| 3680.04369 | 0.99229 | 3680.04369 | 0.99195 |
| 3678.11495 | 0.99229 | 3678.11495 | 0.99203 |
| 3676.1862 | 0.99238 | 3676.1862 | 0.99218 |
| 3674.25746 | 0.99239 | 3674.25746 | 0.99224 |
| 3672.32872 | 0.99229 | 3672.32872 | 0.9922 |
| 3670.39997 | 0.99239 | 3670.39997 | 0.99239 |
| 3668.47123 | 0.99282 | 3668.47123 | 0.99286 |
| 3666.54248 | 0.99306 | 3666.54248 | 0.9931 |
| 3664.61374 | 0.99296 | 3664.61374 | 0.99298 |
| 3662.685 | 0.9928 | 3662.685 | 0.99285 |
| 3660.75625 | 0.99288 | 3660.75625 | 0.99297 |
| 3658.82751 | 0.9932 | 3658.82751 | 0.99332 |
| 3656.89876 | 0.99346 | 3656.89876 | 0.99358 |
| 3654.97002 | 0.99358 | 3654.97002 | 0.9937 |
| 3653.04128 | 0.99356 | 3653.04128 | 0.99369 |
| 3651.11253 | 0.99332 | 3651.11253 | 0.99346 |
| 3649.18379 | 0.99304 | 3649.18379 | 0.99322 |
| 3647.25504 | 0.993 | 3647.25504 | 0.99324 |
| 3645.3263 | 0.99307 | 3645.3263 | 0.99335 |
| 3643.39756 | 0.99312 | 3643.39756 | 0.99343 |
| 3641.46881 | 0.99315 | 3641.46881 | 0.99349 |
| 3639.54007 | 0.99308 | 3639.54007 | 0.99343 |
| 3637.61132 | 0.99269 | 3637.61132 | 0.99306 |
| 3635.68258 | 0.99212 | 3635.68258 | 0.99255 |
| 3633.75384 | 0.99169 | 3633.75384 | 0.9922 |
| 3631.82509 | 0.9912 | 3631.82509 | 0.9918 |
| 3629.89635 | 0.99067 | 3629.89635 | 0.99137 |
| 3627.9676 | 0.99047 | 3627.9676 | 0.99128 |
| 3626.03886 | 0.99042 | 3626.03886 | 0.9913 |
| 3624.11011 | 0.99018 | 3624.11011 | 0.9911 |
| 3622.18137 | 0.98983 | 3622.18137 | 0.99082 |
| 3620.25263 | 0.98953 | 3620.25263 | 0.99058 |
| 3618.32388 | 0.98919 | 3618.32388 | 0.99031 |
| 3616.39514 | 0.98883 | 3616.39514 | 0.99003 |
| 3614.46639 | 0.98851 | 3614.46639 | 0.9898 |
| 3612.53765 | 0.98803 | 3612.53765 | 0.98939 |
| 3610.60891 | 0.98722 | 3610.60891 | 0.98868 |
| 3608.68016 | 0.98645 | 3608.68016 | 0.9881 |
| 3606.75142 | 0.98611 | 3606.75142 | 0.98794 |
| 3604.82267 | 0.98589 | 3604.82267 | 0.98785 |
| 3602.89393 | 0.98552 | 3602.89393 | 0.98759 |
| 3600.96519 | 0.98509 | 3600.96519 | 0.98727 |
| 3599.03644 | 0.98468 | 3599.03644 | 0.987 |
| 3597.1077 | 0.98429 | 3597.1077 | 0.98675 |
| 3595.17895 | 0.9839 | 3595.17895 | 0.98649 |
| 3593.25021 | 0.98347 | 3593.25021 | 0.98618 |
| 3591.32147 | 0.98281 | 3591.32147 | 0.98564 |
| 3589.39272 | 0.9819 | 3589.39272 | 0.98487 |
| 3587.46398 | 0.98122 | 3587.46398 | 0.98437 |
| 3585.53523 | 0.98089 | 3585.53523 | 0.9842 |
| 3583.60649 | 0.98053 | 3583.60649 | 0.98396 |
| 3581.67775 | 0.97993 | 3581.67775 | 0.98347 |
| 3579.749 | 0.97915 | 3579.749 | 0.98284 |
| 3577.82026 | 0.97846 | 3577.82026 | 0.98232 |
| 3575.89151 | 0.97789 | 3575.89151 | 0.98192 |
| 3573.96277 | 0.9773 | 3573.96277 | 0.98148 |
| 3572.03403 | 0.97669 | 3572.03403 | 0.98102 |
| 3570.10528 | 0.97611 | 3570.10528 | 0.98058 |
| 3568.17654 | 0.97559 | 3568.17654 | 0.98021 |
| 3566.24779 | 0.9752 | 3566.24779 | 0.97996 |
| 3564.31905 | 0.97489 | 3564.31905 | 0.97977 |
| 3562.3903 | 0.97452 | 3562.3903 | 0.9795 |
| 3560.46156 | 0.97406 | 3560.46156 | 0.97914 |
| 3558.53282 | 0.97357 | 3558.53282 | 0.97875 |
| 3556.60407 | 0.97303 | 3556.60407 | 0.97833 |
| 3554.67533 | 0.97247 | 3554.67533 | 0.9779 |
| 3552.74658 | 0.97199 | 3552.74658 | 0.97753 |
| 3550.81784 | 0.97149 | 3550.81784 | 0.97713 |
| 3548.8891 | 0.97084 | 3548.8891 | 0.97656 |
| 3546.96035 | 0.97011 | 3546.96035 | 0.97593 |
| 3545.03161 | 0.96956 | 3545.03161 | 0.97551 |
| 3543.10286 | 0.96918 | 3543.10286 | 0.97524 |
| 3541.17412 | 0.96881 | 3541.17412 | 0.97494 |
| 3539.24538 | 0.9684 | 3539.24538 | 0.9746 |
| 3537.31663 | 0.968 | 3537.31663 | 0.97426 |
| 3535.38789 | 0.96763 | 3535.38789 | 0.97396 |
| 3533.45914 | 0.96729 | 3533.45914 | 0.97369 |
| 3531.5304 | 0.96691 | 3531.5304 | 0.97337 |
| 3529.60166 | 0.96634 | 3529.60166 | 0.97286 |
| 3527.67291 | 0.96555 | 3527.67291 | 0.97213 |
| 3525.74417 | 0.96476 | 3525.74417 | 0.97144 |
| 3523.81542 | 0.96415 | 3523.81542 | 0.97094 |
| 3521.88668 | 0.96364 | 3521.88668 | 0.97054 |
| 3519.95794 | 0.96315 | 3519.95794 | 0.97013 |
| 3518.02919 | 0.96265 | 3518.02919 | 0.96972 |
| 3516.10045 | 0.96216 | 3516.10045 | 0.96931 |
| 3514.1717 | 0.96164 | 3514.1717 | 0.96888 |
| 3512.24296 | 0.96112 | 3512.24296 | 0.96844 |
| 3510.31421 | 0.9606 | 3510.31421 | 0.96801 |
| 3508.38547 | 0.96003 | 3508.38547 | 0.96752 |
| 3506.45673 | 0.95939 | 3506.45673 | 0.96698 |
| 3504.52798 | 0.95881 | 3504.52798 | 0.96649 |
| 3502.59924 | 0.95832 | 3502.59924 | 0.96612 |
| 3500.67049 | 0.9579 | 3500.67049 | 0.96579 |
| 3498.74175 | 0.95746 | 3498.74175 | 0.96543 |
| 3496.81301 | 0.957 | 3496.81301 | 0.96506 |
| 3494.88426 | 0.95657 | 3494.88426 | 0.96471 |
| 3492.95552 | 0.95614 | 3492.95552 | 0.96438 |
| 3491.02677 | 0.95567 | 3491.02677 | 0.96399 |
| 3489.09803 | 0.95515 | 3489.09803 | 0.96357 |
| 3487.16929 | 0.95461 | 3487.16929 | 0.96312 |
| 3485.24054 | 0.95404 | 3485.24054 | 0.96265 |
| 3483.3118 | 0.95345 | 3483.3118 | 0.96217 |
| 3481.38305 | 0.95288 | 3481.38305 | 0.9617 |
| 3479.45431 | 0.95232 | 3479.45431 | 0.96125 |
| 3477.52557 | 0.95176 | 3477.52557 | 0.96079 |
| 3475.59682 | 0.9512 | 3475.59682 | 0.96032 |
| 3473.66808 | 0.95065 | 3473.66808 | 0.95984 |
| 3471.73933 | 0.95009 | 3471.73933 | 0.95934 |
| 3469.81059 | 0.94951 | 3469.81059 | 0.95884 |
| 3467.88185 | 0.94895 | 3467.88185 | 0.95835 |
| 3465.9531 | 0.9484 | 3465.9531 | 0.95788 |
| 3464.02436 | 0.94784 | 3464.02436 | 0.9574 |
| 3462.09561 | 0.94732 | 3462.09561 | 0.95694 |
| 3460.16687 | 0.94686 | 3460.16687 | 0.95655 |
| 3458.23812 | 0.94641 | 3458.23812 | 0.95616 |
| 3456.30938 | 0.94596 | 3456.30938 | 0.95578 |
| 3454.38064 | 0.94554 | 3454.38064 | 0.95542 |
| 3452.45189 | 0.94514 | 3452.45189 | 0.95509 |
| 3450.52315 | 0.94474 | 3450.52315 | 0.95476 |
| 3448.5944 | 0.94438 | 3448.5944 | 0.95446 |
| 3446.66566 | 0.94406 | 3446.66566 | 0.95419 |
| 3444.73692 | 0.94379 | 3444.73692 | 0.95396 |
| 3442.80817 | 0.94353 | 3442.80817 | 0.95373 |
| 3440.87943 | 0.94329 | 3440.87943 | 0.95353 |
| 3438.95068 | 0.94312 | 3438.95068 | 0.95339 |
| 3437.02194 | 0.94302 | 3437.02194 | 0.95331 |
| 3435.0932 | 0.94297 | 3435.0932 | 0.95328 |
| 3433.16445 | 0.94297 | 3433.16445 | 0.95329 |
| 3431.23571 | 0.94302 | 3431.23571 | 0.95335 |
| 3429.30696 | 0.94312 | 3429.30696 | 0.95344 |
| 3427.37822 | 0.94329 | 3427.37822 | 0.9536 |
| 3425.44948 | 0.9435 | 3425.44948 | 0.9538 |
| 3423.52073 | 0.94374 | 3423.52073 | 0.95403 |
| 3421.59199 | 0.944 | 3421.59199 | 0.95427 |
| 3419.66324 | 0.94429 | 3419.66324 | 0.95455 |
| 3417.7345 | 0.94461 | 3417.7345 | 0.95486 |
| 3415.80576 | 0.94496 | 3415.80576 | 0.95519 |
| 3413.87701 | 0.94535 | 3413.87701 | 0.95555 |
| 3411.94827 | 0.94576 | 3411.94827 | 0.95593 |
| 3410.01952 | 0.94617 | 3410.01952 | 0.95631 |
| 3408.09078 | 0.94658 | 3408.09078 | 0.95667 |
| 3406.16203 | 0.94701 | 3406.16203 | 0.95705 |
| 3404.23329 | 0.94748 | 3404.23329 | 0.95747 |
| 3402.30455 | 0.948 | 3402.30455 | 0.95794 |
| 3400.3758 | 0.94855 | 3400.3758 | 0.95843 |
| 3398.44706 | 0.94916 | 3398.44706 | 0.95897 |
| 3396.51831 | 0.94982 | 3396.51831 | 0.95957 |
| 3394.58957 | 0.95052 | 3394.58957 | 0.96021 |
| 3392.66083 | 0.95123 | 3392.66083 | 0.96088 |
| 3390.73208 | 0.95197 | 3390.73208 | 0.96156 |
| 3388.80334 | 0.95273 | 3388.80334 | 0.96226 |
| 3386.87459 | 0.95355 | 3386.87459 | 0.96298 |
| 3384.94585 | 0.95439 | 3384.94585 | 0.96372 |
| 3383.01711 | 0.95523 | 3383.01711 | 0.96447 |
| 3381.08836 | 0.95608 | 3381.08836 | 0.96522 |
| 3379.15962 | 0.95696 | 3379.15962 | 0.96601 |
| 3377.23087 | 0.95787 | 3377.23087 | 0.96683 |
| 3375.30213 | 0.95882 | 3375.30213 | 0.96768 |
| 3373.37339 | 0.95981 | 3373.37339 | 0.96857 |
| 3371.44464 | 0.96082 | 3371.44464 | 0.96947 |
| 3369.5159 | 0.96186 | 3369.5159 | 0.97039 |
| 3367.58715 | 0.96291 | 3367.58715 | 0.97131 |
| 3365.65841 | 0.96394 | 3365.65841 | 0.97221 |
| 3363.72967 | 0.96499 | 3363.72967 | 0.97311 |
| 3361.80092 | 0.96608 | 3361.80092 | 0.97404 |
| 3359.87218 | 0.96718 | 3359.87218 | 0.975 |
| 3357.94343 | 0.96829 | 3357.94343 | 0.97596 |
| 3356.01469 | 0.96939 | 3356.01469 | 0.97691 |
| 3354.08594 | 0.97049 | 3354.08594 | 0.97784 |
| 3352.1572 | 0.97158 | 3352.1572 | 0.97877 |
| 3350.22846 | 0.97267 | 3350.22846 | 0.97968 |
| 3348.29971 | 0.97372 | 3348.29971 | 0.98057 |
| 3346.37097 | 0.97472 | 3346.37097 | 0.98142 |
| 3344.44222 | 0.97569 | 3344.44222 | 0.98225 |
| 3342.51348 | 0.97666 | 3342.51348 | 0.98308 |
| 3340.58474 | 0.97764 | 3340.58474 | 0.98392 |
| 3338.65599 | 0.9786 | 3338.65599 | 0.98476 |
| 3336.72725 | 0.97953 | 3336.72725 | 0.98556 |
| 3334.7985 | 0.98043 | 3334.7985 | 0.98633 |
| 3332.86976 | 0.9813 | 3332.86976 | 0.98708 |
| 3330.94102 | 0.98216 | 3330.94102 | 0.98781 |
| 3329.01227 | 0.983 | 3329.01227 | 0.98855 |
| 3327.08353 | 0.98382 | 3327.08353 | 0.98927 |
| 3325.15478 | 0.98462 | 3325.15478 | 0.98997 |
| 3323.22604 | 0.98538 | 3323.22604 | 0.99065 |
| 3321.2973 | 0.98611 | 3321.2973 | 0.99129 |
| 3319.36855 | 0.98681 | 3319.36855 | 0.9919 |
| 3317.43981 | 0.98746 | 3317.43981 | 0.99247 |
| 3315.51106 | 0.98807 | 3315.51106 | 0.993 |
| 3313.58232 | 0.98866 | 3313.58232 | 0.9935 |
| 3311.65358 | 0.98922 | 3311.65358 | 0.99397 |
| 3309.72483 | 0.98976 | 3309.72483 | 0.99443 |
| 3307.79609 | 0.99027 | 3307.79609 | 0.99488 |
| 3305.86734 | 0.99077 | 3305.86734 | 0.99531 |
| 3303.9386 | 0.99124 | 3303.9386 | 0.99573 |
| 3302.00985 | 0.99169 | 3302.00985 | 0.99612 |
| 3300.08111 | 0.9921 | 3300.08111 | 0.99647 |
| 3298.15237 | 0.99248 | 3298.15237 | 0.99679 |
| 3296.22362 | 0.99282 | 3296.22362 | 0.99707 |
| 3294.29488 | 0.99312 | 3294.29488 | 0.99731 |
| 3292.36613 | 0.9934 | 3292.36613 | 0.9975 |
| 3290.43739 | 0.99366 | 3290.43739 | 0.99767 |
| 3288.50865 | 0.99389 | 3288.50865 | 0.99781 |
| 3286.5799 | 0.9941 | 3286.5799 | 0.99794 |
| 3284.65116 | 0.9943 | 3284.65116 | 0.99807 |
| 3282.72241 | 0.99449 | 3282.72241 | 0.99818 |
| 3280.79367 | 0.99466 | 3280.79367 | 0.99826 |
| 3278.86493 | 0.99482 | 3278.86493 | 0.99832 |
| 3276.93618 | 0.99495 | 3276.93618 | 0.99835 |
| 3275.00744 | 0.99507 | 3275.00744 | 0.99837 |
| 3273.07869 | 0.99515 | 3273.07869 | 0.99837 |
| 3271.14995 | 0.99523 | 3271.14995 | 0.99838 |
| 3269.22121 | 0.99532 | 3269.22121 | 0.99842 |
| 3267.29246 | 0.99544 | 3267.29246 | 0.99849 |
| 3265.36372 | 0.99557 | 3265.36372 | 0.99857 |
| 3263.43497 | 0.9957 | 3263.43497 | 0.99864 |
| 3261.50623 | 0.99583 | 3261.50623 | 0.9987 |
| 3259.57749 | 0.99596 | 3259.57749 | 0.99874 |
| 3257.64874 | 0.99608 | 3257.64874 | 0.99878 |
| 3255.72 | 0.99621 | 3255.72 | 0.99885 |
| 3253.79125 | 0.99635 | 3253.79125 | 0.99892 |
| 3251.86251 | 0.99649 | 3251.86251 | 0.999 |
| 3249.93376 | 0.99663 | 3249.93376 | 0.99908 |
| 3248.00502 | 0.99677 | 3248.00502 | 0.99915 |
| 3246.07628 | 0.9969 | 3246.07628 | 0.99921 |
| 3244.14753 | 0.99702 | 3244.14753 | 0.99926 |
| 3242.21879 | 0.99715 | 3242.21879 | 0.99931 |
| 3240.29004 | 0.99728 | 3240.29004 | 0.99936 |
| 3238.3613 | 0.99741 | 3238.3613 | 0.99942 |
| 3236.43256 | 0.99754 | 3236.43256 | 0.99949 |
| 3234.50381 | 0.99768 | 3234.50381 | 0.99955 |
| 3232.57507 | 0.99782 | 3232.57507 | 0.99963 |
| 3230.64632 | 0.99798 | 3230.64632 | 0.99972 |
| 3228.71758 | 0.99814 | 3228.71758 | 0.99981 |
| 3226.78884 | 0.99829 | 3226.78884 | 0.99988 |
| 3224.86009 | 0.99842 | 3224.86009 | 0.99995 |
| 3222.93135 | 0.99855 | 3222.93135 | 1.00001 |
| 3221.0026 | 0.99867 | 3221.0026 | 1.00006 |
| 3219.07386 | 0.99879 | 3219.07386 | 1.00012 |
| 3217.14512 | 0.99892 | 3217.14512 | 1.00018 |
| 3215.21637 | 0.99904 | 3215.21637 | 1.00024 |
| 3213.28763 | 0.99914 | 3213.28763 | 1.00029 |
| 3211.35888 | 0.99924 | 3211.35888 | 1.00035 |
| 3209.43014 | 0.99934 | 3209.43014 | 1.00041 |
| 3207.5014 | 0.99945 | 3207.5014 | 1.00047 |
| 3205.57265 | 0.99955 | 3205.57265 | 1.00051 |
| 3203.64391 | 0.99965 | 3203.64391 | 1.00055 |
| 3201.71516 | 0.99973 | 3201.71516 | 1.00058 |
| 3199.78642 | 0.99981 | 3199.78642 | 1.00061 |
| 3197.85767 | 0.99988 | 3197.85767 | 1.00064 |
| 3195.92893 | 0.99994 | 3195.92893 | 1.00067 |
| 3194.00019 | 0.99999 | 3194.00019 | 1.0007 |
| 3192.07144 | 1.00004 | 3192.07144 | 1.00071 |
| 3190.1427 | 1.00008 | 3190.1427 | 1.00072 |
| 3188.21395 | 1.00013 | 3188.21395 | 1.00072 |
| 3186.28521 | 1.00018 | 3186.28521 | 1.00072 |
| 3184.35647 | 1.00023 | 3184.35647 | 1.00072 |
| 3182.42772 | 1.00028 | 3182.42772 | 1.00072 |
| 3180.49898 | 1.00031 | 3180.49898 | 1.00071 |
| 3178.57023 | 1.00033 | 3178.57023 | 1.0007 |
| 3176.64149 | 1.00036 | 3176.64149 | 1.00068 |
| 3174.71275 | 1.00038 | 3174.71275 | 1.00067 |
| 3172.784 | 1.00042 | 3172.784 | 1.00067 |
| 3170.85526 | 1.00046 | 3170.85526 | 1.00067 |
| 3168.92651 | 1.00049 | 3168.92651 | 1.00065 |
| 3166.99777 | 1.00053 | 3166.99777 | 1.00064 |
| 3165.06903 | 1.00056 | 3165.06903 | 1.00064 |
| 3163.14028 | 1.0006 | 3163.14028 | 1.00064 |
| 3161.21154 | 1.00061 | 3161.21154 | 1.00063 |
| 3159.28279 | 1.00061 | 3159.28279 | 1.00059 |
| 3157.35405 | 1.0006 | 3157.35405 | 1.00055 |
| 3155.42531 | 1.00059 | 3155.42531 | 1.00052 |
| 3153.49656 | 1.00059 | 3153.49656 | 1.00051 |
| 3151.56782 | 1.00059 | 3151.56782 | 1.00051 |
| 3149.63907 | 1.0006 | 3149.63907 | 1.00052 |
| 3147.71033 | 1.00059 | 3147.71033 | 1.00053 |
| 3145.78158 | 1.00059 | 3145.78158 | 1.00054 |
| 3143.85284 | 1.00059 | 3143.85284 | 1.00055 |
| 3141.9241 | 1.00059 | 3141.9241 | 1.00056 |
| 3139.99535 | 1.00057 | 3139.99535 | 1.00057 |
| 3138.06661 | 1.00054 | 3138.06661 | 1.00056 |
| 3136.13786 | 1.00051 | 3136.13786 | 1.00055 |
| 3134.20912 | 1.00049 | 3134.20912 | 1.00055 |
| 3132.28038 | 1.00046 | 3132.28038 | 1.00053 |
| 3130.35163 | 1.00042 | 3130.35163 | 1.00049 |
| 3128.42289 | 1.00037 | 3128.42289 | 1.00045 |
| 3126.49414 | 1.00032 | 3126.49414 | 1.00041 |
| 3124.5654 | 1.00027 | 3124.5654 | 1.00037 |
| 3122.63666 | 1.00021 | 3122.63666 | 1.00032 |
| 3120.70791 | 1.00015 | 3120.70791 | 1.00027 |
| 3118.77917 | 1.00008 | 3118.77917 | 1.00021 |
| 3116.85042 | 1.00003 | 3116.85042 | 1.00015 |
| 3114.92168 | 1 | 3114.92168 | 1.00012 |
| 3112.99294 | 1.00001 | 3112.99294 | 1.00013 |
| 3111.06419 | 1.00002 | 3111.06419 | 1.00015 |
| 3109.13545 | 1.00004 | 3109.13545 | 1.00016 |
| 3107.2067 | 1.00005 | 3107.2067 | 1.00017 |
| 3105.27796 | 1.00006 | 3105.27796 | 1.00017 |
| 3103.34922 | 1.00008 | 3103.34922 | 1.00018 |
| 3101.42047 | 1.00012 | 3101.42047 | 1.00021 |
| 3099.49173 | 1.00018 | 3099.49173 | 1.00025 |
| 3097.56298 | 1.00023 | 3097.56298 | 1.0003 |
| 3095.63424 | 1.00026 | 3095.63424 | 1.00033 |
| 3093.70549 | 1.00028 | 3093.70549 | 1.00034 |
| 3091.77675 | 1.0003 | 3091.77675 | 1.00034 |
| 3089.84801 | 1.00032 | 3089.84801 | 1.00036 |
| 3087.91926 | 1.00033 | 3087.91926 | 1.00037 |
| 3085.99052 | 1.00034 | 3085.99052 | 1.00037 |
| 3084.06177 | 1.00032 | 3084.06177 | 1.00035 |
| 3082.13303 | 1.0003 | 3082.13303 | 1.00033 |
| 3080.20429 | 1.00029 | 3080.20429 | 1.00032 |
| 3078.27554 | 1.00029 | 3078.27554 | 1.00033 |
| 3076.3468 | 1.00031 | 3076.3468 | 1.00035 |
| 3074.41805 | 1.00033 | 3074.41805 | 1.00037 |
| 3072.48931 | 1.00034 | 3072.48931 | 1.00038 |
| 3070.56057 | 1.00035 | 3070.56057 | 1.00039 |
| 3068.63182 | 1.00036 | 3068.63182 | 1.0004 |
| 3066.70308 | 1.00036 | 3066.70308 | 1.00041 |
| 3064.77433 | 1.00035 | 3064.77433 | 1.0004 |
| 3062.84559 | 1.00033 | 3062.84559 | 1.00037 |
| 3060.91685 | 1.0003 | 3060.91685 | 1.00035 |
| 3058.9881 | 1.00028 | 3058.9881 | 1.00034 |
| 3057.05936 | 1.00026 | 3057.05936 | 1.00032 |
| 3055.13061 | 1.00023 | 3055.13061 | 1.00029 |
| 3053.20187 | 1.00021 | 3053.20187 | 1.00026 |
| 3051.27313 | 1.0002 | 3051.27313 | 1.00025 |
| 3049.34438 | 1.00022 | 3049.34438 | 1.00025 |
| 3047.41564 | 1.00025 | 3047.41564 | 1.00028 |
| 3045.48689 | 1.0003 | 3045.48689 | 1.00031 |
| 3043.55815 | 1.00036 | 3043.55815 | 1.00036 |
| 3041.6294 | 1.00041 | 3041.6294 | 1.00042 |
| 3039.70066 | 1.00047 | 3039.70066 | 1.00048 |
| 3037.77192 | 1.00053 | 3037.77192 | 1.00054 |
| 3035.84317 | 1.00058 | 3035.84317 | 1.00059 |
| 3033.91443 | 1.00061 | 3033.91443 | 1.00064 |
| 3031.98568 | 1.00065 | 3031.98568 | 1.00066 |
| 3030.05694 | 1.00069 | 3030.05694 | 1.00069 |
| 3028.1282 | 1.00074 | 3028.1282 | 1.00073 |
| 3026.19945 | 1.0008 | 3026.19945 | 1.00077 |
| 3024.27071 | 1.00084 | 3024.27071 | 1.0008 |
| 3022.34196 | 1.00085 | 3022.34196 | 1.00079 |
| 3020.41322 | 1.00084 | 3020.41322 | 1.00077 |
| 3018.48448 | 1.00083 | 3018.48448 | 1.00073 |
| 3016.55573 | 1.00081 | 3016.55573 | 1.0007 |
| 3014.62699 | 1.00079 | 3014.62699 | 1.00068 |
| 3012.69824 | 1.00075 | 3012.69824 | 1.00067 |
| 3010.7695 | 1.00069 | 3010.7695 | 1.00065 |
| 3008.84076 | 1.0006 | 3008.84076 | 1.00061 |
| 3006.91201 | 1.00048 | 3006.91201 | 1.00056 |
| 3004.98327 | 1.00033 | 3004.98327 | 1.0005 |
| 3003.05452 | 1.00016 | 3003.05452 | 1.00043 |
| 3001.12578 | 0.99996 | 3001.12578 | 1.00036 |
| 2999.19704 | 0.99975 | 2999.19704 | 1.00027 |
| 2997.26829 | 0.9995 | 2997.26829 | 1.00016 |
| 2995.33955 | 0.99925 | 2995.33955 | 1.00003 |
| 2993.4108 | 0.99897 | 2993.4108 | 0.99989 |
| 2991.48206 | 0.99869 | 2991.48206 | 0.99972 |
| 2989.55331 | 0.99841 | 2989.55331 | 0.99954 |
| 2987.62457 | 0.99813 | 2987.62457 | 0.99936 |
| 2985.69583 | 0.99787 | 2985.69583 | 0.99918 |
| 2983.76708 | 0.99763 | 2983.76708 | 0.99902 |
| 2981.83834 | 0.99745 | 2981.83834 | 0.99889 |
| 2979.90959 | 0.99731 | 2979.90959 | 0.99878 |
| 2977.98085 | 0.99722 | 2977.98085 | 0.9987 |
| 2976.05211 | 0.99717 | 2976.05211 | 0.99865 |
| 2974.12336 | 0.99715 | 2974.12336 | 0.99863 |
| 2972.19462 | 0.99716 | 2972.19462 | 0.99863 |
| 2970.26587 | 0.99718 | 2970.26587 | 0.99863 |
| 2968.33713 | 0.99719 | 2968.33713 | 0.9986 |
| 2966.40839 | 0.9972 | 2966.40839 | 0.99856 |
| 2964.47964 | 0.9972 | 2964.47964 | 0.9985 |
| 2962.5509 | 0.9972 | 2962.5509 | 0.99839 |
| 2960.62215 | 0.99717 | 2960.62215 | 0.99824 |
| 2958.69341 | 0.99711 | 2958.69341 | 0.99805 |
| 2956.76467 | 0.99702 | 2956.76467 | 0.9978 |
| 2954.83592 | 0.99689 | 2954.83592 | 0.9975 |
| 2952.90718 | 0.99674 | 2952.90718 | 0.99715 |
| 2950.97843 | 0.99657 | 2950.97843 | 0.99679 |
| 2949.04969 | 0.99639 | 2949.04969 | 0.99641 |
| 2947.12095 | 0.9962 | 2947.12095 | 0.99603 |
| 2945.1922 | 0.99603 | 2945.1922 | 0.99566 |
| 2943.26346 | 0.99587 | 2943.26346 | 0.99531 |
| 2941.33471 | 0.99572 | 2941.33471 | 0.99499 |
| 2939.40597 | 0.99557 | 2939.40597 | 0.9947 |
| 2937.47722 | 0.9954 | 2937.47722 | 0.99442 |
| 2935.54848 | 0.99521 | 2935.54848 | 0.99415 |
| 2933.61974 | 0.99503 | 2933.61974 | 0.9939 |
| 2931.69099 | 0.99487 | 2931.69099 | 0.99368 |
| 2929.76225 | 0.99472 | 2929.76225 | 0.99348 |
| 2927.8335 | 0.99457 | 2927.8335 | 0.99332 |
| 2925.90476 | 0.99445 | 2925.90476 | 0.99318 |
| 2923.97602 | 0.99434 | 2923.97602 | 0.99308 |
| 2922.04727 | 0.99426 | 2922.04727 | 0.99302 |
| 2920.11853 | 0.99422 | 2920.11853 | 0.993 |
| 2918.18978 | 0.9942 | 2918.18978 | 0.99301 |
| 2916.26104 | 0.99423 | 2916.26104 | 0.99308 |
| 2914.3323 | 0.9943 | 2914.3323 | 0.99319 |
| 2912.40355 | 0.99442 | 2912.40355 | 0.99335 |
| 2910.47481 | 0.99459 | 2910.47481 | 0.99359 |
| 2908.54606 | 0.99481 | 2908.54606 | 0.99388 |
| 2906.61732 | 0.99509 | 2906.61732 | 0.99423 |
| 2904.68858 | 0.99542 | 2904.68858 | 0.99464 |
| 2902.75983 | 0.99578 | 2902.75983 | 0.99508 |
| 2900.83109 | 0.99614 | 2900.83109 | 0.99554 |
| 2898.90234 | 0.9965 | 2898.90234 | 0.99601 |
| 2896.9736 | 0.99686 | 2896.9736 | 0.99648 |
| 2895.04486 | 0.99722 | 2895.04486 | 0.99693 |
| 2893.11611 | 0.99755 | 2893.11611 | 0.99735 |
| 2891.18737 | 0.99784 | 2891.18737 | 0.9977 |
| 2889.25862 | 0.99807 | 2889.25862 | 0.99799 |
| 2887.32988 | 0.9982 | 2887.32988 | 0.99817 |
| 2885.40113 | 0.99824 | 2885.40113 | 0.99824 |
| 2883.47239 | 0.9982 | 2883.47239 | 0.99823 |
| 2881.54365 | 0.9981 | 2881.54365 | 0.99815 |
| 2879.6149 | 0.99796 | 2879.6149 | 0.99802 |
| 2877.68616 | 0.99782 | 2877.68616 | 0.99786 |
| 2875.75741 | 0.99769 | 2875.75741 | 0.99771 |
| 2873.82867 | 0.99759 | 2873.82867 | 0.99758 |
| 2871.89993 | 0.99751 | 2871.89993 | 0.99748 |
| 2869.97118 | 0.99745 | 2869.97118 | 0.99738 |
| 2868.04244 | 0.9974 | 2868.04244 | 0.9973 |
| 2866.11369 | 0.99737 | 2866.11369 | 0.99722 |
| 2864.18495 | 0.99735 | 2864.18495 | 0.99715 |
| 2862.25621 | 0.99734 | 2862.25621 | 0.9971 |
| 2860.32746 | 0.99735 | 2860.32746 | 0.99706 |
| 2858.39872 | 0.99738 | 2858.39872 | 0.99705 |
| 2856.46997 | 0.99744 | 2856.46997 | 0.99706 |
| 2854.54123 | 0.99753 | 2854.54123 | 0.99711 |
| 2852.61249 | 0.99762 | 2852.61249 | 0.99717 |
| 2850.68374 | 0.99771 | 2850.68374 | 0.99724 |
| 2848.755 | 0.99781 | 2848.755 | 0.99733 |
| 2846.82625 | 0.99792 | 2846.82625 | 0.99744 |
| 2844.89751 | 0.99805 | 2844.89751 | 0.99756 |
| 2842.96877 | 0.99819 | 2842.96877 | 0.99771 |
| 2841.04002 | 0.99833 | 2841.04002 | 0.99787 |
| 2839.11128 | 0.99849 | 2839.11128 | 0.99803 |
| 2837.18253 | 0.99864 | 2837.18253 | 0.99821 |
| 2835.25379 | 0.9988 | 2835.25379 | 0.9984 |
| 2833.32504 | 0.99898 | 2833.32504 | 0.99862 |
| 2831.3963 | 0.99917 | 2831.3963 | 0.99885 |
| 2829.46756 | 0.99935 | 2829.46756 | 0.99907 |
| 2827.53881 | 0.99952 | 2827.53881 | 0.99929 |
| 2825.61007 | 0.99968 | 2825.61007 | 0.99951 |
| 2823.68132 | 0.99985 | 2823.68132 | 0.99973 |
| 2821.75258 | 0.99999 | 2821.75258 | 0.99992 |
| 2819.82384 | 1.0001 | 2819.82384 | 1.00008 |
| 2817.89509 | 1.00018 | 2817.89509 | 1.00021 |
| 2815.96635 | 1.00021 | 2815.96635 | 1.00028 |
| 2814.0376 | 1.00019 | 2814.0376 | 1.0003 |
| 2812.10886 | 1.00013 | 2812.10886 | 1.00029 |
| 2810.18012 | 1.00007 | 2810.18012 | 1.00025 |
| 2808.25137 | 1.00001 | 2808.25137 | 1.0002 |
| 2806.32263 | 0.99996 | 2806.32263 | 1.00015 |
| 2804.39388 | 0.99991 | 2804.39388 | 1.0001 |
| 2802.46514 | 0.99987 | 2802.46514 | 1.00006 |
| 2800.5364 | 0.99984 | 2800.5364 | 1.00002 |
| 2798.60765 | 0.99982 | 2798.60765 | 1 |
| 2796.67891 | 0.99979 | 2796.67891 | 0.99999 |
| 2794.75016 | 0.99976 | 2794.75016 | 0.99997 |
| 2792.82142 | 0.99973 | 2792.82142 | 0.99994 |
| 2790.89268 | 0.99968 | 2790.89268 | 0.99991 |
| 2788.96393 | 0.99964 | 2788.96393 | 0.99987 |
| 2787.03519 | 0.99958 | 2787.03519 | 0.99983 |
| 2785.10644 | 0.99953 | 2785.10644 | 0.99981 |
| 2783.1777 | 0.99948 | 2783.1777 | 0.99979 |
| 2781.24895 | 0.99944 | 2781.24895 | 0.99976 |
| 2779.32021 | 0.9994 | 2779.32021 | 0.99974 |
| 2777.39147 | 0.99936 | 2777.39147 | 0.99972 |
| 2775.46272 | 0.99931 | 2775.46272 | 0.99969 |
| 2773.53398 | 0.99926 | 2773.53398 | 0.99967 |
| 2771.60523 | 0.99923 | 2771.60523 | 0.99965 |
| 2769.67649 | 0.9992 | 2769.67649 | 0.99964 |
| 2767.74775 | 0.99917 | 2767.74775 | 0.99963 |
| 2765.819 | 0.99913 | 2765.819 | 0.99961 |
| 2763.89026 | 0.99908 | 2763.89026 | 0.99959 |
| 2761.96151 | 0.99905 | 2761.96151 | 0.99958 |
| 2760.03277 | 0.99903 | 2760.03277 | 0.99957 |
| 2758.10403 | 0.99901 | 2758.10403 | 0.99958 |
| 2756.17528 | 0.99901 | 2756.17528 | 0.99959 |
| 2754.24654 | 0.99901 | 2754.24654 | 0.99959 |
| 2752.31779 | 0.99901 | 2752.31779 | 0.9996 |
| 2750.38905 | 0.99902 | 2750.38905 | 0.99962 |
| 2748.46031 | 0.99904 | 2748.46031 | 0.99964 |
| 2746.53156 | 0.99906 | 2746.53156 | 0.99965 |
| 2744.60282 | 0.99909 | 2744.60282 | 0.99967 |
| 2742.67407 | 0.99911 | 2742.67407 | 0.99969 |
| 2740.74533 | 0.99915 | 2740.74533 | 0.99972 |
| 2738.81659 | 0.9992 | 2738.81659 | 0.99975 |
| 2736.88784 | 0.99925 | 2736.88784 | 0.99978 |
| 2734.9591 | 0.99932 | 2734.9591 | 0.99982 |
| 2733.03035 | 0.9994 | 2733.03035 | 0.99986 |
| 2731.10161 | 0.99947 | 2731.10161 | 0.99989 |
| 2729.17286 | 0.99952 | 2729.17286 | 0.99991 |
| 2727.24412 | 0.99956 | 2727.24412 | 0.99993 |
| 2725.31538 | 0.99959 | 2725.31538 | 0.99994 |
| 2723.38663 | 0.99961 | 2723.38663 | 0.99995 |
| 2721.45789 | 0.99963 | 2721.45789 | 0.99996 |
| 2719.52914 | 0.99965 | 2719.52914 | 0.99997 |
| 2717.6004 | 0.99968 | 2717.6004 | 0.99999 |
| 2715.67166 | 0.99971 | 2715.67166 | 1.00001 |
| 2713.74291 | 0.99974 | 2713.74291 | 1.00004 |
| 2711.81417 | 0.99977 | 2711.81417 | 1.00007 |
| 2709.88542 | 0.9998 | 2709.88542 | 1.00012 |
| 2707.95668 | 0.99984 | 2707.95668 | 1.00017 |
| 2706.02794 | 0.99989 | 2706.02794 | 1.00021 |
| 2704.09919 | 0.99993 | 2704.09919 | 1.00025 |
| 2702.17045 | 0.99996 | 2702.17045 | 1.00028 |
| 2700.2417 | 0.99998 | 2700.2417 | 1.0003 |
| 2698.31296 | 1.00001 | 2698.31296 | 1.00033 |
| 2696.38422 | 1.00003 | 2696.38422 | 1.00035 |
| 2694.45547 | 1.00005 | 2694.45547 | 1.00038 |
| 2692.52673 | 1.00005 | 2692.52673 | 1.00039 |
| 2690.59798 | 1.00005 | 2690.59798 | 1.00039 |
| 2688.66924 | 1.00005 | 2688.66924 | 1.0004 |
| 2686.7405 | 1.00005 | 2686.7405 | 1.0004 |
| 2684.81175 | 1.00006 | 2684.81175 | 1.00041 |
| 2682.88301 | 1.00006 | 2682.88301 | 1.00042 |
| 2680.95426 | 1.00007 | 2680.95426 | 1.00042 |
| 2679.02552 | 1.00007 | 2679.02552 | 1.00041 |
| 2677.09677 | 1.00007 | 2677.09677 | 1.0004 |
| 2675.16803 | 1.00007 | 2675.16803 | 1.00039 |
| 2673.23929 | 1.00007 | 2673.23929 | 1.00037 |
| 2671.31054 | 1.00007 | 2671.31054 | 1.00036 |
| 2669.3818 | 1.00007 | 2669.3818 | 1.00034 |
| 2667.45305 | 1.00007 | 2667.45305 | 1.00033 |
| 2665.52431 | 1.00006 | 2665.52431 | 1.00031 |
| 2663.59557 | 1.00006 | 2663.59557 | 1.00029 |
| 2661.66682 | 1.00005 | 2661.66682 | 1.00028 |
| 2659.73808 | 1.00005 | 2659.73808 | 1.00027 |
| 2657.80933 | 1.00006 | 2657.80933 | 1.00026 |
| 2655.88059 | 1.00006 | 2655.88059 | 1.00024 |
| 2653.95185 | 1.00006 | 2653.95185 | 1.00023 |
| 2652.0231 | 1.00006 | 2652.0231 | 1.00022 |
| 2650.09436 | 1.00005 | 2650.09436 | 1.00022 |
| 2648.16561 | 1.00006 | 2648.16561 | 1.00021 |
| 2646.23687 | 1.00007 | 2646.23687 | 1.00022 |
| 2644.30813 | 1.00009 | 2644.30813 | 1.00024 |
| 2642.37938 | 1.00011 | 2642.37938 | 1.00026 |
| 2640.45064 | 1.00014 | 2640.45064 | 1.00029 |
| 2638.52189 | 1.00016 | 2638.52189 | 1.00031 |
| 2636.59315 | 1.00018 | 2636.59315 | 1.00033 |
| 2634.66441 | 1.0002 | 2634.66441 | 1.00034 |
| 2632.73566 | 1.00022 | 2632.73566 | 1.00036 |
| 2630.80692 | 1.00024 | 2630.80692 | 1.00036 |
| 2628.87817 | 1.00025 | 2628.87817 | 1.00036 |
| 2626.94943 | 1.00025 | 2626.94943 | 1.00035 |
| 2625.02068 | 1.00025 | 2625.02068 | 1.00034 |
| 2623.09194 | 1.00025 | 2623.09194 | 1.00033 |
| 2621.1632 | 1.00025 | 2621.1632 | 1.00032 |
| 2619.23445 | 1.00024 | 2619.23445 | 1.00031 |
| 2617.30571 | 1.00022 | 2617.30571 | 1.0003 |
| 2615.37696 | 1.0002 | 2615.37696 | 1.00028 |
| 2613.44822 | 1.00018 | 2613.44822 | 1.00026 |
| 2611.51948 | 1.00017 | 2611.51948 | 1.00025 |
| 2609.59073 | 1.00016 | 2609.59073 | 1.00024 |
| 2607.66199 | 1.00016 | 2607.66199 | 1.00023 |
| 2605.73324 | 1.00015 | 2605.73324 | 1.00022 |
| 2603.8045 | 1.00014 | 2603.8045 | 1.00021 |
| 2601.87576 | 1.00012 | 2601.87576 | 1.0002 |
| 2599.94701 | 1.00011 | 2599.94701 | 1.00019 |
| 2598.01827 | 1.00011 | 2598.01827 | 1.00018 |
| 2596.08952 | 1.00011 | 2596.08952 | 1.00019 |
| 2594.16078 | 1.00011 | 2594.16078 | 1.00019 |
| 2592.23204 | 1.00011 | 2592.23204 | 1.0002 |
| 2590.30329 | 1.0001 | 2590.30329 | 1.00021 |
| 2588.37455 | 1.0001 | 2588.37455 | 1.00023 |
| 2586.4458 | 1.0001 | 2586.4458 | 1.00024 |
| 2584.51706 | 1.00011 | 2584.51706 | 1.00026 |
| 2582.58832 | 1.00011 | 2582.58832 | 1.00027 |
| 2580.65957 | 1.0001 | 2580.65957 | 1.00028 |
| 2578.73083 | 1.0001 | 2578.73083 | 1.00029 |
| 2576.80208 | 1.0001 | 2576.80208 | 1.0003 |
| 2574.87334 | 1.0001 | 2574.87334 | 1.00031 |
| 2572.94459 | 1.00009 | 2572.94459 | 1.00031 |
| 2571.01585 | 1.00009 | 2571.01585 | 1.00031 |
| 2569.08711 | 1.00008 | 2569.08711 | 1.00031 |
| 2567.15836 | 1.00008 | 2567.15836 | 1.0003 |
| 2565.22962 | 1.00007 | 2565.22962 | 1.00029 |
| 2563.30087 | 1.00007 | 2563.30087 | 1.00028 |
| 2561.37213 | 1.00006 | 2561.37213 | 1.00026 |
| 2559.44339 | 1.00006 | 2559.44339 | 1.00024 |
| 2557.51464 | 1.00005 | 2557.51464 | 1.00022 |
| 2555.5859 | 1.00005 | 2555.5859 | 1.0002 |
| 2553.65715 | 1.00005 | 2553.65715 | 1.00018 |
| 2551.72841 | 1.00004 | 2551.72841 | 1.00016 |
| 2549.79967 | 1.00004 | 2549.79967 | 1.00014 |
| 2547.87092 | 1.00004 | 2547.87092 | 1.00012 |
| 2545.94218 | 1.00003 | 2545.94218 | 1.0001 |
| 2544.01343 | 1.00003 | 2544.01343 | 1.00009 |
| 2542.08469 | 1.00003 | 2542.08469 | 1.00008 |
| 2540.15595 | 1.00003 | 2540.15595 | 1.00007 |
| 2538.2272 | 1.00002 | 2538.2272 | 1.00006 |
| 2536.29846 | 1.00002 | 2536.29846 | 1.00005 |
| 2534.36971 | 1.00001 | 2534.36971 | 1.00004 |
| 2532.44097 | 1.00001 | 2532.44097 | 1.00003 |
| 2530.51223 | 1 | 2530.51223 | 1.00002 |
| 2528.58348 | 1 | 2528.58348 | 1.00002 |
| 2526.65474 | 0.99999 | 2526.65474 | 1.00002 |
| 2524.72599 | 0.99999 | 2524.72599 | 1.00001 |
| 2522.79725 | 0.99998 | 2522.79725 | 1.00001 |
| 2520.8685 | 0.99997 | 2520.8685 | 1.00001 |
| 2518.93976 | 0.99996 | 2518.93976 | 1.00001 |
| 2517.01102 | 0.99995 | 2517.01102 | 1 |
| 2515.08227 | 0.99994 | 2515.08227 | 1 |
| 2513.15353 | 0.99993 | 2513.15353 | 1 |
| 2511.22478 | 0.99992 | 2511.22478 | 1 |
| 2509.29604 | 0.99992 | 2509.29604 | 1 |
| 2507.3673 | 0.99992 | 2507.3673 | 1.00001 |
| 2505.43855 | 0.99991 | 2505.43855 | 1.00001 |
| 2503.50981 | 0.99991 | 2503.50981 | 1.00002 |
| 2501.58106 | 0.99992 | 2501.58106 | 1.00003 |
| 2499.65232 | 0.99992 | 2499.65232 | 1.00004 |
| 2497.72358 | 0.99993 | 2497.72358 | 1.00005 |
| 2495.79483 | 0.99994 | 2495.79483 | 1.00006 |
| 2493.86609 | 0.99996 | 2493.86609 | 1.00007 |
| 2491.93734 | 0.99998 | 2491.93734 | 1.00008 |
| 2490.0086 | 1 | 2490.0086 | 1.00009 |
| 2488.07986 | 1.00003 | 2488.07986 | 1.00011 |
| 2486.15111 | 1.00005 | 2486.15111 | 1.00013 |
| 2484.22237 | 1.00007 | 2484.22237 | 1.00015 |
| 2482.29362 | 1.0001 | 2482.29362 | 1.00017 |
| 2480.36488 | 1.00012 | 2480.36488 | 1.00019 |
| 2478.43614 | 1.00014 | 2478.43614 | 1.00022 |
| 2476.50739 | 1.00016 | 2476.50739 | 1.00023 |
| 2474.57865 | 1.00017 | 2474.57865 | 1.00025 |
| 2472.6499 | 1.00018 | 2472.6499 | 1.00026 |
| 2470.72116 | 1.00019 | 2470.72116 | 1.00028 |
| 2468.79241 | 1.0002 | 2468.79241 | 1.00029 |
| 2466.86367 | 1.0002 | 2466.86367 | 1.00029 |
| 2464.93493 | 1.0002 | 2464.93493 | 1.0003 |
| 2463.00618 | 1.00019 | 2463.00618 | 1.00029 |
| 2461.07744 | 1.00018 | 2461.07744 | 1.00029 |
| 2459.14869 | 1.00016 | 2459.14869 | 1.00029 |
| 2457.21995 | 1.00015 | 2457.21995 | 1.00028 |
| 2455.29121 | 1.00013 | 2455.29121 | 1.00028 |
| 2453.36246 | 1.00011 | 2453.36246 | 1.00027 |
| 2451.43372 | 1.00009 | 2451.43372 | 1.00026 |
| 2449.50497 | 1.00006 | 2449.50497 | 1.00024 |
| 2447.57623 | 1.00003 | 2447.57623 | 1.00022 |
| 2445.64749 | 1 | 2445.64749 | 1.0002 |
| 2443.71874 | 0.99997 | 2443.71874 | 1.00018 |
| 2441.79 | 0.99994 | 2441.79 | 1.00016 |
| 2439.86125 | 0.99992 | 2439.86125 | 1.00015 |
| 2437.93251 | 0.9999 | 2437.93251 | 1.00014 |
| 2436.00377 | 0.99989 | 2436.00377 | 1.00013 |
| 2434.07502 | 0.99988 | 2434.07502 | 1.00012 |
| 2432.14628 | 0.99987 | 2432.14628 | 1.00012 |
| 2430.21753 | 0.99986 | 2430.21753 | 1.00011 |
| 2428.28879 | 0.99987 | 2428.28879 | 1.00013 |
| 2426.36005 | 0.99994 | 2426.36005 | 1.00021 |
| 2424.4313 | 1.0001 | 2424.4313 | 1.00038 |
| 2422.50256 | 1.0004 | 2422.50256 | 1.00069 |
| 2420.57381 | 1.00085 | 2420.57381 | 1.00117 |
| 2418.64507 | 1.00143 | 2418.64507 | 1.00179 |
| 2416.71632 | 1.00206 | 2416.71632 | 1.00247 |
| 2414.78758 | 1.00268 | 2414.78758 | 1.00314 |
| 2412.85884 | 1.00323 | 2412.85884 | 1.00374 |
| 2410.93009 | 1.00367 | 2410.93009 | 1.00423 |
| 2409.00135 | 1.00396 | 2409.00135 | 1.00457 |
| 2407.0726 | 1.00404 | 2407.0726 | 1.00466 |
| 2405.14386 | 1.00385 | 2405.14386 | 1.00445 |
| 2403.21512 | 1.0033 | 2403.21512 | 1.00382 |
| 2401.28637 | 1.00231 | 2401.28637 | 1.00271 |
| 2399.35763 | 1.00079 | 2399.35763 | 1.00103 |
| 2397.42888 | 0.9987 | 2397.42888 | 0.9987 |
| 2395.50014 | 0.99598 | 2395.50014 | 0.99567 |
| 2393.5714 | 0.99261 | 2393.5714 | 0.9919 |
| 2391.64265 | 0.98864 | 2391.64265 | 0.98747 |
| 2389.71391 | 0.98428 | 2389.71391 | 0.9826 |
| 2387.78516 | 0.97986 | 2387.78516 | 0.97765 |
| 2385.85642 | 0.97565 | 2385.85642 | 0.97295 |
| 2383.92768 | 0.97173 | 2383.92768 | 0.96856 |
| 2381.99893 | 0.96789 | 2381.99893 | 0.96426 |
| 2380.07019 | 0.96396 | 2380.07019 | 0.95987 |
| 2378.14144 | 0.95997 | 2378.14144 | 0.9554 |
| 2376.2127 | 0.95597 | 2376.2127 | 0.95092 |
| 2374.28396 | 0.95205 | 2374.28396 | 0.94652 |
| 2372.35521 | 0.94828 | 2372.35521 | 0.94231 |
| 2370.42647 | 0.94472 | 2370.42647 | 0.93832 |
| 2368.49772 | 0.94132 | 2368.49772 | 0.93451 |
| 2366.56898 | 0.93809 | 2366.56898 | 0.93088 |
| 2364.64023 | 0.93509 | 2364.64023 | 0.92749 |
| 2362.71149 | 0.93236 | 2362.71149 | 0.92442 |
| 2360.78275 | 0.92991 | 2360.78275 | 0.92166 |
| 2358.854 | 0.92772 | 2358.854 | 0.91919 |
| 2356.92526 | 0.92583 | 2356.92526 | 0.91708 |
| 2354.99651 | 0.92437 | 2354.99651 | 0.91543 |
| 2353.06777 | 0.92345 | 2353.06777 | 0.91437 |
| 2351.13903 | 0.92312 | 2351.13903 | 0.91398 |
| 2349.21028 | 0.92336 | 2349.21028 | 0.91422 |
| 2347.28154 | 0.92413 | 2347.28154 | 0.91505 |
| 2345.35279 | 0.92536 | 2345.35279 | 0.9164 |
| 2343.42405 | 0.92698 | 2343.42405 | 0.91821 |
| 2341.49531 | 0.92893 | 2341.49531 | 0.92039 |
| 2339.56656 | 0.93114 | 2339.56656 | 0.92288 |
| 2337.63782 | 0.93356 | 2337.63782 | 0.92561 |
| 2335.70907 | 0.93616 | 2335.70907 | 0.92854 |
| 2333.78033 | 0.93885 | 2333.78033 | 0.93159 |
| 2331.85159 | 0.94156 | 2331.85159 | 0.93466 |
| 2329.92284 | 0.94422 | 2329.92284 | 0.93767 |
| 2327.9941 | 0.94676 | 2327.9941 | 0.94053 |
| 2326.06535 | 0.94913 | 2326.06535 | 0.94321 |
| 2324.13661 | 0.95132 | 2324.13661 | 0.9457 |
| 2322.20787 | 0.95337 | 2322.20787 | 0.94803 |
| 2320.27912 | 0.95534 | 2320.27912 | 0.95025 |
| 2318.35038 | 0.95733 | 2318.35038 | 0.95248 |
| 2316.42163 | 0.95945 | 2316.42163 | 0.95487 |
| 2314.49289 | 0.96185 | 2314.49289 | 0.95756 |
| 2312.56414 | 0.96467 | 2312.56414 | 0.96072 |
| 2310.6354 | 0.96788 | 2310.6354 | 0.96431 |
| 2308.70666 | 0.97124 | 2308.70666 | 0.96806 |
| 2306.77791 | 0.97445 | 2306.77791 | 0.97164 |
| 2304.84917 | 0.97731 | 2304.84917 | 0.97483 |
| 2302.92042 | 0.97991 | 2302.92042 | 0.97773 |
| 2300.99168 | 0.98241 | 2300.99168 | 0.98051 |
| 2299.06294 | 0.98484 | 2299.06294 | 0.98321 |
| 2297.13419 | 0.98716 | 2297.13419 | 0.9858 |
| 2295.20545 | 0.98934 | 2295.20545 | 0.98822 |
| 2293.2767 | 0.99131 | 2293.2767 | 0.99039 |
| 2291.34796 | 0.99302 | 2291.34796 | 0.99226 |
| 2289.41922 | 0.9945 | 2289.41922 | 0.99389 |
| 2287.49047 | 0.9958 | 2287.49047 | 0.99531 |
| 2285.56173 | 0.9969 | 2285.56173 | 0.99651 |
| 2283.63298 | 0.99777 | 2283.63298 | 0.99747 |
| 2281.70424 | 0.99846 | 2281.70424 | 0.99821 |
| 2279.7755 | 0.99906 | 2279.7755 | 0.99885 |
| 2277.84675 | 0.99962 | 2277.84675 | 0.99944 |
| 2275.91801 | 1.0001 | 2275.91801 | 0.99994 |
| 2273.98926 | 1.00045 | 2273.98926 | 1.00031 |
| 2272.06052 | 1.00064 | 2272.06052 | 1.00051 |
| 2270.13178 | 1.00071 | 2270.13178 | 1.00059 |
| 2268.20303 | 1.00071 | 2268.20303 | 1.00058 |
| 2266.27429 | 1.00068 | 2266.27429 | 1.00055 |
| 2264.34554 | 1.00064 | 2264.34554 | 1.0005 |
| 2262.4168 | 1.00057 | 2262.4168 | 1.00043 |
| 2260.48805 | 1.00047 | 2260.48805 | 1.00032 |
| 2258.55931 | 1.00035 | 2258.55931 | 1.0002 |
| 2256.63057 | 1.00023 | 2256.63057 | 1.00007 |
| 2254.70182 | 1.0001 | 2254.70182 | 0.99994 |
| 2252.77308 | 0.99999 | 2252.77308 | 0.99983 |
| 2250.84433 | 0.9999 | 2250.84433 | 0.99975 |
| 2248.91559 | 0.99985 | 2248.91559 | 0.99969 |
| 2246.98685 | 0.99983 | 2246.98685 | 0.99967 |
| 2245.0581 | 0.99984 | 2245.0581 | 0.9997 |
| 2243.12936 | 0.99988 | 2243.12936 | 0.99975 |
| 2241.20061 | 0.99991 | 2241.20061 | 0.99981 |
| 2239.27187 | 0.99995 | 2239.27187 | 0.99986 |
| 2237.34313 | 0.99998 | 2237.34313 | 0.9999 |
| 2235.41438 | 1 | 2235.41438 | 0.99994 |
| 2233.48564 | 1.00001 | 2233.48564 | 0.99996 |
| 2231.55689 | 1.00002 | 2231.55689 | 0.99999 |
| 2229.62815 | 1.00002 | 2229.62815 | 1.00001 |
| 2227.69941 | 1.00002 | 2227.69941 | 1.00002 |
| 2225.77066 | 1.00002 | 2225.77066 | 1.00002 |
| 2223.84192 | 1 | 2223.84192 | 1.00002 |
| 2221.91317 | 0.99999 | 2221.91317 | 1.00001 |
| 2219.98443 | 0.99997 | 2219.98443 | 1 |
| 2218.05569 | 0.99996 | 2218.05569 | 0.99999 |
| 2216.12694 | 0.99995 | 2216.12694 | 0.99998 |
| 2214.1982 | 0.99994 | 2214.1982 | 0.99997 |
| 2212.26945 | 0.99993 | 2212.26945 | 0.99996 |
| 2210.34071 | 0.99993 | 2210.34071 | 0.99996 |
| 2208.41196 | 0.99993 | 2208.41196 | 0.99996 |
| 2206.48322 | 0.99992 | 2206.48322 | 0.99996 |
| 2204.55448 | 0.99992 | 2204.55448 | 0.99996 |
| 2202.62573 | 0.99993 | 2202.62573 | 0.99996 |
| 2200.69699 | 0.99993 | 2200.69699 | 0.99996 |
| 2198.76824 | 0.99993 | 2198.76824 | 0.99996 |
| 2196.8395 | 0.99993 | 2196.8395 | 0.99996 |
| 2194.91076 | 0.99993 | 2194.91076 | 0.99996 |
| 2192.98201 | 0.99993 | 2192.98201 | 0.99995 |
| 2191.05327 | 0.99994 | 2191.05327 | 0.99995 |
| 2189.12452 | 0.99994 | 2189.12452 | 0.99995 |
| 2187.19578 | 0.99995 | 2187.19578 | 0.99995 |
| 2185.26704 | 0.99995 | 2185.26704 | 0.99995 |
| 2183.33829 | 0.99996 | 2183.33829 | 0.99995 |
| 2181.40955 | 0.99996 | 2181.40955 | 0.99995 |
| 2179.4808 | 0.99996 | 2179.4808 | 0.99995 |
| 2177.55206 | 0.99997 | 2177.55206 | 0.99995 |
| 2175.62332 | 0.99997 | 2175.62332 | 0.99995 |
| 2173.69457 | 0.99997 | 2173.69457 | 0.99994 |
| 2171.76583 | 0.99997 | 2171.76583 | 0.99994 |
| 2169.83708 | 0.99997 | 2169.83708 | 0.99993 |
| 2167.90834 | 0.99997 | 2167.90834 | 0.99993 |
| 2165.9796 | 0.99997 | 2165.9796 | 0.99993 |
| 2164.05085 | 0.99997 | 2164.05085 | 0.99992 |
| 2162.12211 | 0.99996 | 2162.12211 | 0.99992 |
| 2160.19336 | 0.99996 | 2160.19336 | 0.99992 |
| 2158.26462 | 0.99996 | 2158.26462 | 0.99992 |
| 2156.33587 | 0.99997 | 2156.33587 | 0.99992 |
| 2154.40713 | 0.99997 | 2154.40713 | 0.99992 |
| 2152.47839 | 0.99998 | 2152.47839 | 0.99993 |
| 2150.54964 | 0.99998 | 2150.54964 | 0.99993 |
| 2148.6209 | 0.99998 | 2148.6209 | 0.99993 |
| 2146.69215 | 0.99998 | 2146.69215 | 0.99994 |
| 2144.76341 | 0.99999 | 2144.76341 | 0.99994 |
| 2142.83467 | 0.99999 | 2142.83467 | 0.99995 |
| 2140.90592 | 1 | 2140.90592 | 0.99996 |
| 2138.97718 | 1.00001 | 2138.97718 | 0.99997 |
| 2137.04843 | 1.00001 | 2137.04843 | 0.99999 |
| 2135.11969 | 1.00001 | 2135.11969 | 1 |
| 2133.19095 | 1.00002 | 2133.19095 | 1.00002 |
| 2131.2622 | 1.00003 | 2131.2622 | 1.00003 |
| 2129.33346 | 1.00004 | 2129.33346 | 1.00004 |
| 2127.40471 | 1.00004 | 2127.40471 | 1.00005 |
| 2125.47597 | 1.00005 | 2125.47597 | 1.00006 |
| 2123.54723 | 1.00004 | 2123.54723 | 1.00006 |
| 2121.61848 | 1.00004 | 2121.61848 | 1.00006 |
| 2119.68974 | 1.00003 | 2119.68974 | 1.00006 |
| 2117.76099 | 1.00003 | 2117.76099 | 1.00006 |
| 2115.83225 | 1.00003 | 2115.83225 | 1.00007 |
| 2113.90351 | 1.00003 | 2113.90351 | 1.00008 |
| 2111.97476 | 1.00002 | 2111.97476 | 1.00008 |
| 2110.04602 | 1.00002 | 2110.04602 | 1.00008 |
| 2108.11727 | 1.00001 | 2108.11727 | 1.00008 |
| 2106.18853 | 1.00001 | 2106.18853 | 1.00009 |
| 2104.25978 | 1.00001 | 2104.25978 | 1.0001 |
| 2102.33104 | 1.00002 | 2102.33104 | 1.0001 |
| 2100.4023 | 1.00001 | 2100.4023 | 1.0001 |
| 2098.47355 | 0.99999 | 2098.47355 | 1.00009 |
| 2096.54481 | 0.99998 | 2096.54481 | 1.00008 |
| 2094.61606 | 0.99996 | 2094.61606 | 1.00007 |
| 2092.68732 | 0.99995 | 2092.68732 | 1.00006 |
| 2090.75858 | 0.99994 | 2090.75858 | 1.00005 |
| 2088.82983 | 0.99994 | 2088.82983 | 1.00005 |
| 2086.90109 | 0.99994 | 2086.90109 | 1.00005 |
| 2084.97234 | 0.99994 | 2084.97234 | 1.00005 |
| 2083.0436 | 0.99994 | 2083.0436 | 1.00006 |
| 2081.11486 | 0.99996 | 2081.11486 | 1.00008 |
| 2079.18611 | 0.99997 | 2079.18611 | 1.00009 |
| 2077.25737 | 0.99997 | 2077.25737 | 1.0001 |
| 2075.32862 | 0.99997 | 2075.32862 | 1.0001 |
| 2073.39988 | 0.99997 | 2073.39988 | 1.0001 |
| 2071.47114 | 0.99997 | 2071.47114 | 1.0001 |
| 2069.54239 | 0.99998 | 2069.54239 | 1.0001 |
| 2067.61365 | 0.99998 | 2067.61365 | 1.0001 |
| 2065.6849 | 0.99999 | 2065.6849 | 1.0001 |
| 2063.75616 | 0.99999 | 2063.75616 | 1.0001 |
| 2061.82742 | 1 | 2061.82742 | 1.00011 |
| 2059.89867 | 1.00001 | 2059.89867 | 1.00011 |
| 2057.96993 | 1.00003 | 2057.96993 | 1.00013 |
| 2056.04118 | 1.00006 | 2056.04118 | 1.00015 |
| 2054.11244 | 1.00007 | 2054.11244 | 1.00015 |
| 2052.18369 | 1.00005 | 2052.18369 | 1.00012 |
| 2050.25495 | 1.00003 | 2050.25495 | 1.0001 |
| 2048.32621 | 1.00001 | 2048.32621 | 1.00007 |
| 2046.39746 | 0.99999 | 2046.39746 | 1.00006 |
| 2044.46872 | 0.99998 | 2044.46872 | 1.00004 |
| 2042.53997 | 0.99997 | 2042.53997 | 1.00003 |
| 2040.61123 | 0.99996 | 2040.61123 | 1.00002 |
| 2038.68249 | 0.99995 | 2038.68249 | 1.00002 |
| 2036.75374 | 0.99995 | 2036.75374 | 1.00001 |
| 2034.825 | 0.99996 | 2034.825 | 1.00002 |
| 2032.89625 | 1 | 2032.89625 | 1.00006 |
| 2030.96751 | 1.00005 | 2030.96751 | 1.00011 |
| 2029.03877 | 1.00008 | 2029.03877 | 1.00013 |
| 2027.11002 | 1.00007 | 2027.11002 | 1.00011 |
| 2025.18128 | 1.00002 | 2025.18128 | 1.00006 |
| 2023.25253 | 0.99997 | 2023.25253 | 1.00001 |
| 2021.32379 | 0.99993 | 2021.32379 | 0.99997 |
| 2019.39505 | 0.99989 | 2019.39505 | 0.99993 |
| 2017.4663 | 0.99985 | 2017.4663 | 0.9999 |
| 2015.53756 | 0.99982 | 2015.53756 | 0.99988 |
| 2013.60881 | 0.99979 | 2013.60881 | 0.99985 |
| 2011.68007 | 0.99976 | 2011.68007 | 0.99983 |
| 2009.75133 | 0.99975 | 2009.75133 | 0.99983 |
| 2007.82258 | 0.99976 | 2007.82258 | 0.99984 |
| 2005.89384 | 0.99977 | 2005.89384 | 0.99987 |
| 2003.96509 | 0.99975 | 2003.96509 | 0.99985 |
| 2002.03635 | 0.9997 | 2002.03635 | 0.99981 |
| 2000.1076 | 0.99965 | 2000.1076 | 0.99977 |
| 1998.17886 | 0.99959 | 1998.17886 | 0.99974 |
| 1996.25012 | 0.99955 | 1996.25012 | 0.99972 |
| 1994.32137 | 0.99952 | 1994.32137 | 0.9997 |
| 1992.39263 | 0.99949 | 1992.39263 | 0.99969 |
| 1990.46388 | 0.99945 | 1990.46388 | 0.99968 |
| 1988.53514 | 0.99943 | 1988.53514 | 0.99968 |
| 1986.6064 | 0.99943 | 1986.6064 | 0.9997 |
| 1984.67765 | 0.99946 | 1984.67765 | 0.99976 |
| 1982.74891 | 0.99952 | 1982.74891 | 0.99984 |
| 1980.82016 | 0.99957 | 1980.82016 | 0.99989 |
| 1978.89142 | 0.99953 | 1978.89142 | 0.99987 |
| 1976.96268 | 0.99945 | 1976.96268 | 0.99981 |
| 1975.03393 | 0.99938 | 1975.03393 | 0.99977 |
| 1973.10519 | 0.99934 | 1973.10519 | 0.99976 |
| 1971.17644 | 0.99931 | 1971.17644 | 0.99976 |
| 1969.2477 | 0.9993 | 1969.2477 | 0.99976 |
| 1967.31896 | 0.99929 | 1967.31896 | 0.99978 |
| 1965.39021 | 0.99932 | 1965.39021 | 0.99982 |
| 1963.46147 | 0.9994 | 1963.46147 | 0.9999 |
| 1961.53272 | 0.99949 | 1961.53272 | 1 |
| 1959.60398 | 0.99958 | 1959.60398 | 1.00009 |
| 1957.67524 | 0.99966 | 1957.67524 | 1.00017 |
| 1955.74649 | 0.99969 | 1955.74649 | 1.00019 |
| 1953.81775 | 0.99962 | 1953.81775 | 1.00012 |
| 1951.889 | 0.99952 | 1951.889 | 1.00003 |
| 1949.96026 | 0.99945 | 1949.96026 | 0.99996 |
| 1948.03151 | 0.99941 | 1948.03151 | 0.99992 |
| 1946.10277 | 0.99936 | 1946.10277 | 0.99987 |
| 1944.17403 | 0.9993 | 1944.17403 | 0.99982 |
| 1942.24528 | 0.99924 | 1942.24528 | 0.99976 |
| 1940.31654 | 0.99919 | 1940.31654 | 0.99971 |
| 1938.38779 | 0.99915 | 1938.38779 | 0.99966 |
| 1936.45905 | 0.99914 | 1936.45905 | 0.99964 |
| 1934.53031 | 0.99915 | 1934.53031 | 0.99965 |
| 1932.60156 | 0.99916 | 1932.60156 | 0.99966 |
| 1930.67282 | 0.99919 | 1930.67282 | 0.99968 |
| 1928.74407 | 0.9992 | 1928.74407 | 0.99969 |
| 1926.81533 | 0.99915 | 1926.81533 | 0.99964 |
| 1924.88659 | 0.99907 | 1924.88659 | 0.99957 |
| 1922.95784 | 0.999 | 1922.95784 | 0.99952 |
| 1921.0291 | 0.99896 | 1921.0291 | 0.99948 |
| 1919.10035 | 0.99892 | 1919.10035 | 0.99945 |
| 1917.17161 | 0.9989 | 1917.17161 | 0.99943 |
| 1915.24287 | 0.99889 | 1915.24287 | 0.99942 |
| 1913.31412 | 0.99891 | 1913.31412 | 0.99944 |
| 1911.38538 | 0.99899 | 1911.38538 | 0.99952 |
| 1909.45663 | 0.99918 | 1909.45663 | 0.99969 |
| 1907.52789 | 0.99937 | 1907.52789 | 0.99985 |
| 1905.59915 | 0.99942 | 1905.59915 | 0.99987 |
| 1903.6704 | 0.99929 | 1903.6704 | 0.99975 |
| 1901.74166 | 0.99913 | 1901.74166 | 0.99959 |
| 1899.81291 | 0.99903 | 1899.81291 | 0.9995 |
| 1897.88417 | 0.99897 | 1897.88417 | 0.99945 |
| 1895.95542 | 0.99893 | 1895.95542 | 0.9994 |
| 1894.02668 | 0.9989 | 1894.02668 | 0.99936 |
| 1892.09794 | 0.99889 | 1892.09794 | 0.99934 |
| 1890.16919 | 0.99891 | 1890.16919 | 0.99934 |
| 1888.24045 | 0.99898 | 1888.24045 | 0.9994 |
| 1886.3117 | 0.99911 | 1886.3117 | 0.99951 |
| 1884.38296 | 0.99925 | 1884.38296 | 0.99963 |
| 1882.45422 | 0.99928 | 1882.45422 | 0.99963 |
| 1880.52547 | 0.99915 | 1880.52547 | 0.99948 |
| 1878.59673 | 0.99894 | 1878.59673 | 0.99926 |
| 1876.66798 | 0.99877 | 1876.66798 | 0.9991 |
| 1874.73924 | 0.99867 | 1874.73924 | 0.99898 |
| 1872.8105 | 0.9986 | 1872.8105 | 0.9989 |
| 1870.88175 | 0.99858 | 1870.88175 | 0.99887 |
| 1868.95301 | 0.99859 | 1868.95301 | 0.99887 |
| 1867.02426 | 0.99858 | 1867.02426 | 0.99883 |
| 1865.09552 | 0.99854 | 1865.09552 | 0.99878 |
| 1863.16678 | 0.99848 | 1863.16678 | 0.99871 |
| 1861.23803 | 0.99835 | 1861.23803 | 0.99859 |
| 1859.30929 | 0.99821 | 1859.30929 | 0.99845 |
| 1857.38054 | 0.99808 | 1857.38054 | 0.99834 |
| 1855.4518 | 0.99797 | 1855.4518 | 0.99824 |
| 1853.52306 | 0.99788 | 1853.52306 | 0.99815 |
| 1851.59431 | 0.99782 | 1851.59431 | 0.99809 |
| 1849.66557 | 0.99776 | 1849.66557 | 0.99803 |
| 1847.73682 | 0.9977 | 1847.73682 | 0.99797 |
| 1845.80808 | 0.99765 | 1845.80808 | 0.99793 |
| 1843.87933 | 0.99766 | 1843.87933 | 0.99793 |
| 1841.95059 | 0.99776 | 1841.95059 | 0.99803 |
| 1840.02185 | 0.99793 | 1840.02185 | 0.99817 |
| 1838.0931 | 0.99806 | 1838.0931 | 0.99829 |
| 1836.16436 | 0.99818 | 1836.16436 | 0.99839 |
| 1834.23561 | 0.99834 | 1834.23561 | 0.99854 |
| 1832.30687 | 0.99853 | 1832.30687 | 0.9987 |
| 1830.37813 | 0.99854 | 1830.37813 | 0.99869 |
| 1828.44938 | 0.99831 | 1828.44938 | 0.99848 |
| 1826.52064 | 0.99807 | 1826.52064 | 0.99828 |
| 1824.59189 | 0.99797 | 1824.59189 | 0.99821 |
| 1822.66315 | 0.99794 | 1822.66315 | 0.9982 |
| 1820.73441 | 0.99795 | 1820.73441 | 0.99822 |
| 1818.80566 | 0.99797 | 1818.80566 | 0.99825 |
| 1816.87692 | 0.99801 | 1816.87692 | 0.99829 |
| 1814.94817 | 0.99812 | 1814.94817 | 0.99841 |
| 1813.01943 | 0.99837 | 1813.01943 | 0.99865 |
| 1811.09069 | 0.99864 | 1811.09069 | 0.99891 |
| 1809.16194 | 0.99877 | 1809.16194 | 0.99902 |
| 1807.2332 | 0.9987 | 1807.2332 | 0.99895 |
| 1805.30445 | 0.99844 | 1805.30445 | 0.99873 |
| 1803.37571 | 0.99819 | 1803.37571 | 0.99853 |
| 1801.44697 | 0.99814 | 1801.44697 | 0.99851 |
| 1799.51822 | 0.99815 | 1799.51822 | 0.99854 |
| 1797.58948 | 0.99816 | 1797.58948 | 0.99857 |
| 1795.66073 | 0.99818 | 1795.66073 | 0.99861 |
| 1793.73199 | 0.99821 | 1793.73199 | 0.99866 |
| 1791.80324 | 0.99823 | 1791.80324 | 0.99872 |
| 1789.8745 | 0.99829 | 1789.8745 | 0.99879 |
| 1787.94576 | 0.9983 | 1787.94576 | 0.99883 |
| 1786.01701 | 0.99819 | 1786.01701 | 0.99876 |
| 1784.08827 | 0.99802 | 1784.08827 | 0.99865 |
| 1782.15952 | 0.99791 | 1782.15952 | 0.99858 |
| 1780.23078 | 0.99784 | 1780.23078 | 0.99855 |
| 1778.30204 | 0.99773 | 1778.30204 | 0.99848 |
| 1776.37329 | 0.99764 | 1776.37329 | 0.99843 |
| 1774.44455 | 0.99767 | 1774.44455 | 0.99849 |
| 1772.5158 | 0.99766 | 1772.5158 | 0.9985 |
| 1770.58706 | 0.99744 | 1770.58706 | 0.9983 |
| 1768.65832 | 0.9971 | 1768.65832 | 0.99802 |
| 1766.72957 | 0.99677 | 1766.72957 | 0.99774 |
| 1764.80083 | 0.99644 | 1764.80083 | 0.99747 |
| 1762.87208 | 0.99612 | 1762.87208 | 0.99719 |
| 1760.94334 | 0.99583 | 1760.94334 | 0.99695 |
| 1759.0146 | 0.99574 | 1759.0146 | 0.99689 |
| 1757.08585 | 0.99585 | 1757.08585 | 0.997 |
| 1755.15711 | 0.99584 | 1755.15711 | 0.99697 |
| 1753.22836 | 0.99549 | 1753.22836 | 0.99663 |
| 1751.29962 | 0.99499 | 1751.29962 | 0.99617 |
| 1749.37088 | 0.99462 | 1749.37088 | 0.99585 |
| 1747.44213 | 0.99444 | 1747.44213 | 0.9957 |
| 1745.51339 | 0.99439 | 1745.51339 | 0.99564 |
| 1743.58464 | 0.9944 | 1743.58464 | 0.99564 |
| 1741.6559 | 0.9945 | 1741.6559 | 0.99573 |
| 1739.72715 | 0.99472 | 1739.72715 | 0.99591 |
| 1737.79841 | 0.99491 | 1737.79841 | 0.99605 |
| 1735.86967 | 0.99491 | 1735.86967 | 0.99602 |
| 1733.94092 | 0.99459 | 1733.94092 | 0.9957 |
| 1732.01218 | 0.99405 | 1732.01218 | 0.99521 |
| 1730.08343 | 0.99361 | 1730.08343 | 0.99484 |
| 1728.15469 | 0.99341 | 1728.15469 | 0.99469 |
| 1726.22595 | 0.99348 | 1726.22595 | 0.99478 |
| 1724.2972 | 0.99377 | 1724.2972 | 0.99506 |
| 1722.36846 | 0.99398 | 1722.36846 | 0.99524 |
| 1720.43971 | 0.99394 | 1720.43971 | 0.99522 |
| 1718.51097 | 0.99384 | 1718.51097 | 0.99516 |
| 1716.58223 | 0.99382 | 1716.58223 | 0.99519 |
| 1714.65348 | 0.9939 | 1714.65348 | 0.99532 |
| 1712.72474 | 0.99392 | 1712.72474 | 0.99537 |
| 1710.79599 | 0.99382 | 1710.79599 | 0.99532 |
| 1708.86725 | 0.99368 | 1708.86725 | 0.99527 |
| 1706.93851 | 0.99348 | 1706.93851 | 0.99514 |
| 1705.00976 | 0.9932 | 1705.00976 | 0.99496 |
| 1703.08102 | 0.99296 | 1703.08102 | 0.99482 |
| 1701.15227 | 0.99272 | 1701.15227 | 0.99467 |
| 1699.22353 | 0.99244 | 1699.22353 | 0.99447 |
| 1697.29479 | 0.99214 | 1697.29479 | 0.99427 |
| 1695.36604 | 0.99187 | 1695.36604 | 0.99409 |
| 1693.4373 | 0.99174 | 1693.4373 | 0.99405 |
| 1691.50855 | 0.99163 | 1691.50855 | 0.99399 |
| 1689.57981 | 0.99133 | 1689.57981 | 0.99376 |
| 1687.65106 | 0.99114 | 1687.65106 | 0.99365 |
| 1685.72232 | 0.99106 | 1685.72232 | 0.99361 |
| 1683.79358 | 0.99077 | 1683.79358 | 0.99338 |
| 1681.86483 | 0.99029 | 1681.86483 | 0.99298 |
| 1679.93609 | 0.98967 | 1679.93609 | 0.99245 |
| 1678.00734 | 0.98894 | 1678.00734 | 0.99183 |
| 1676.0786 | 0.98832 | 1676.0786 | 0.99132 |
| 1674.14986 | 0.9878 | 1674.14986 | 0.99089 |
| 1672.22111 | 0.98717 | 1672.22111 | 0.99034 |
| 1670.29237 | 0.98651 | 1670.29237 | 0.98977 |
| 1668.36362 | 0.98588 | 1668.36362 | 0.98921 |
| 1666.43488 | 0.98522 | 1666.43488 | 0.98862 |
| 1664.50614 | 0.98451 | 1664.50614 | 0.98798 |
| 1662.57739 | 0.98369 | 1662.57739 | 0.98722 |
| 1660.64865 | 0.98259 | 1660.64865 | 0.98621 |
| 1658.7199 | 0.98143 | 1658.7199 | 0.98516 |
| 1656.79116 | 0.98041 | 1656.79116 | 0.98424 |
| 1654.86242 | 0.97951 | 1654.86242 | 0.98341 |
| 1652.93367 | 0.97872 | 1652.93367 | 0.98267 |
| 1651.00493 | 0.978 | 1651.00493 | 0.982 |
| 1649.07618 | 0.97733 | 1649.07618 | 0.98136 |
| 1647.14744 | 0.97661 | 1647.14744 | 0.98067 |
| 1645.2187 | 0.97571 | 1645.2187 | 0.97981 |
| 1643.28995 | 0.97481 | 1643.28995 | 0.97898 |
| 1641.36121 | 0.9742 | 1641.36121 | 0.97841 |
| 1639.43246 | 0.97379 | 1639.43246 | 0.978 |
| 1637.50372 | 0.97346 | 1637.50372 | 0.97765 |
| 1635.57497 | 0.97319 | 1635.57497 | 0.97735 |
| 1633.64623 | 0.97301 | 1633.64623 | 0.97713 |
| 1631.71749 | 0.97287 | 1631.71749 | 0.97693 |
| 1629.78874 | 0.97273 | 1629.78874 | 0.97673 |
| 1627.86 | 0.97277 | 1627.86 | 0.97668 |
| 1625.93125 | 0.97304 | 1625.93125 | 0.97682 |
| 1624.00251 | 0.9734 | 1624.00251 | 0.97703 |
| 1622.07377 | 0.97388 | 1622.07377 | 0.97734 |
| 1620.14502 | 0.97459 | 1620.14502 | 0.97786 |
| 1618.21628 | 0.97553 | 1618.21628 | 0.97857 |
| 1616.28753 | 0.97649 | 1616.28753 | 0.97926 |
| 1614.35879 | 0.97711 | 1614.35879 | 0.97962 |
| 1612.43005 | 0.97758 | 1612.43005 | 0.97987 |
| 1610.5013 | 0.97833 | 1610.5013 | 0.9804 |
| 1608.57256 | 0.9791 | 1608.57256 | 0.98093 |
| 1606.64381 | 0.97973 | 1606.64381 | 0.98132 |
| 1604.71507 | 0.98052 | 1604.71507 | 0.98187 |
| 1602.78633 | 0.98159 | 1602.78633 | 0.98267 |
| 1600.85758 | 0.9829 | 1600.85758 | 0.98368 |
| 1598.92884 | 0.98438 | 1598.92884 | 0.98481 |
| 1597.00009 | 0.98551 | 1597.00009 | 0.98559 |
| 1595.07135 | 0.98616 | 1595.07135 | 0.98595 |
| 1593.14261 | 0.98678 | 1593.14261 | 0.98634 |
| 1591.21386 | 0.98743 | 1591.21386 | 0.98677 |
| 1589.28512 | 0.98803 | 1589.28512 | 0.98715 |
| 1587.35637 | 0.98855 | 1587.35637 | 0.98747 |
| 1585.42763 | 0.98905 | 1585.42763 | 0.98779 |
| 1583.49888 | 0.98965 | 1583.49888 | 0.98821 |
| 1581.57014 | 0.9904 | 1581.57014 | 0.98878 |
| 1579.6414 | 0.99107 | 1579.6414 | 0.98926 |
| 1577.71265 | 0.99121 | 1577.71265 | 0.98928 |
| 1575.78391 | 0.99105 | 1575.78391 | 0.98908 |
| 1573.85516 | 0.99101 | 1573.85516 | 0.98904 |
| 1571.92642 | 0.991 | 1571.92642 | 0.98906 |
| 1569.99768 | 0.99086 | 1569.99768 | 0.98896 |
| 1568.06893 | 0.99071 | 1568.06893 | 0.98889 |
| 1566.14019 | 0.99068 | 1566.14019 | 0.98893 |
| 1564.21144 | 0.99071 | 1564.21144 | 0.98906 |
| 1562.2827 | 0.99079 | 1562.2827 | 0.98923 |
| 1560.35396 | 0.99088 | 1560.35396 | 0.98942 |
| 1558.42521 | 0.99085 | 1558.42521 | 0.98951 |
| 1556.49647 | 0.99071 | 1556.49647 | 0.98952 |
| 1554.56772 | 0.99046 | 1554.56772 | 0.98943 |
| 1552.63898 | 0.99013 | 1552.63898 | 0.98929 |
| 1550.71024 | 0.9899 | 1550.71024 | 0.98925 |
| 1548.78149 | 0.98993 | 1548.78149 | 0.98946 |
| 1546.85275 | 0.99021 | 1546.85275 | 0.98987 |
| 1544.924 | 0.99027 | 1544.924 | 0.99007 |
| 1542.99526 | 0.98993 | 1542.99526 | 0.98989 |
| 1541.06652 | 0.98957 | 1541.06652 | 0.9897 |
| 1539.13777 | 0.98931 | 1539.13777 | 0.98961 |
| 1537.20903 | 0.9891 | 1537.20903 | 0.98954 |
| 1535.28028 | 0.98893 | 1535.28028 | 0.98951 |
| 1533.35154 | 0.98887 | 1533.35154 | 0.98957 |
| 1531.42279 | 0.98896 | 1531.42279 | 0.98976 |
| 1529.49405 | 0.98927 | 1529.49405 | 0.99013 |
| 1527.56531 | 0.98974 | 1527.56531 | 0.99061 |
| 1525.63656 | 0.99016 | 1525.63656 | 0.99103 |
| 1523.70782 | 0.9905 | 1523.70782 | 0.99136 |
| 1521.77907 | 0.99067 | 1521.77907 | 0.99152 |
| 1519.85033 | 0.99052 | 1519.85033 | 0.99139 |
| 1517.92159 | 0.99034 | 1517.92159 | 0.99129 |
| 1515.99284 | 0.9906 | 1515.99284 | 0.99158 |
| 1514.0641 | 0.9912 | 1514.0641 | 0.99215 |
| 1512.13535 | 0.99191 | 1512.13535 | 0.99279 |
| 1510.20661 | 0.99247 | 1510.20661 | 0.99329 |
| 1508.27787 | 0.99291 | 1508.27787 | 0.99367 |
| 1506.34912 | 0.99332 | 1506.34912 | 0.99405 |
| 1504.42038 | 0.99361 | 1504.42038 | 0.99431 |
| 1502.49163 | 0.99359 | 1502.49163 | 0.99428 |
| 1500.56289 | 0.99342 | 1500.56289 | 0.99415 |
| 1498.63415 | 0.99365 | 1498.63415 | 0.99443 |
| 1496.7054 | 0.99429 | 1496.7054 | 0.99505 |
| 1494.77666 | 0.99473 | 1494.77666 | 0.99545 |
| 1492.84791 | 0.99486 | 1492.84791 | 0.99557 |
| 1490.91917 | 0.995 | 1490.91917 | 0.99572 |
| 1488.99043 | 0.99521 | 1488.99043 | 0.99593 |
| 1487.06168 | 0.99534 | 1487.06168 | 0.99606 |
| 1485.13294 | 0.99532 | 1485.13294 | 0.99606 |
| 1483.20419 | 0.99513 | 1483.20419 | 0.9959 |
| 1481.27545 | 0.99485 | 1481.27545 | 0.99569 |
| 1479.3467 | 0.99469 | 1479.3467 | 0.99557 |
| 1477.41796 | 0.9947 | 1477.41796 | 0.99562 |
| 1475.48922 | 0.99486 | 1475.48922 | 0.99578 |
| 1473.56047 | 0.995 | 1473.56047 | 0.99592 |
| 1471.63173 | 0.99504 | 1471.63173 | 0.99597 |
| 1469.70298 | 0.99485 | 1469.70298 | 0.99579 |
| 1467.77424 | 0.9943 | 1467.77424 | 0.99528 |
| 1465.8455 | 0.99381 | 1465.8455 | 0.99486 |
| 1463.91675 | 0.99378 | 1463.91675 | 0.99486 |
| 1461.98801 | 0.99399 | 1461.98801 | 0.99505 |
| 1460.05926 | 0.99423 | 1460.05926 | 0.99526 |
| 1458.13052 | 0.99443 | 1458.13052 | 0.99544 |
| 1456.20178 | 0.99457 | 1456.20178 | 0.99555 |
| 1454.27303 | 0.99467 | 1454.27303 | 0.99564 |
| 1452.34429 | 0.99468 | 1452.34429 | 0.99565 |
| 1450.41554 | 0.99451 | 1450.41554 | 0.9955 |
| 1448.4868 | 0.99429 | 1448.4868 | 0.99533 |
| 1446.55806 | 0.99427 | 1446.55806 | 0.99534 |
| 1444.62931 | 0.99446 | 1444.62931 | 0.99555 |
| 1442.70057 | 0.99472 | 1442.70057 | 0.99582 |
| 1440.77182 | 0.99502 | 1440.77182 | 0.99613 |
| 1438.84308 | 0.99537 | 1438.84308 | 0.99648 |
| 1436.91434 | 0.99567 | 1436.91434 | 0.99678 |
| 1434.98559 | 0.99576 | 1434.98559 | 0.99689 |
| 1433.05685 | 0.99562 | 1433.05685 | 0.99682 |
| 1431.1281 | 0.99547 | 1431.1281 | 0.99676 |
| 1429.19936 | 0.9955 | 1429.19936 | 0.99685 |
| 1427.27061 | 0.99563 | 1427.27061 | 0.99704 |
| 1425.34187 | 0.99572 | 1425.34187 | 0.99719 |
| 1423.41313 | 0.99578 | 1423.41313 | 0.99732 |
| 1421.48438 | 0.99578 | 1421.48438 | 0.99738 |
| 1419.55564 | 0.99553 | 1419.55564 | 0.99718 |
| 1417.62689 | 0.99496 | 1417.62689 | 0.99671 |
| 1415.69815 | 0.99445 | 1415.69815 | 0.99631 |
| 1413.76941 | 0.99419 | 1413.76941 | 0.99614 |
| 1411.84066 | 0.99399 | 1411.84066 | 0.996 |
| 1409.91192 | 0.99371 | 1409.91192 | 0.99578 |
| 1407.98317 | 0.99341 | 1407.98317 | 0.99554 |
| 1406.05443 | 0.9932 | 1406.05443 | 0.99538 |
| 1404.12569 | 0.99317 | 1404.12569 | 0.99536 |
| 1402.19694 | 0.99328 | 1402.19694 | 0.99547 |
| 1400.2682 | 0.99335 | 1400.2682 | 0.99553 |
| 1398.33945 | 0.9932 | 1398.33945 | 0.99539 |
| 1396.41071 | 0.99291 | 1396.41071 | 0.99513 |
| 1394.48197 | 0.99272 | 1394.48197 | 0.99496 |
| 1392.55322 | 0.99265 | 1392.55322 | 0.99489 |
| 1390.62448 | 0.99264 | 1390.62448 | 0.99484 |
| 1388.69573 | 0.99272 | 1388.69573 | 0.99488 |
| 1386.76699 | 0.99289 | 1386.76699 | 0.99499 |
| 1384.83825 | 0.99305 | 1384.83825 | 0.9951 |
| 1382.9095 | 0.99318 | 1382.9095 | 0.99519 |
| 1380.98076 | 0.99326 | 1380.98076 | 0.99523 |
| 1379.05201 | 0.99329 | 1379.05201 | 0.99524 |
| 1377.12327 | 0.99339 | 1377.12327 | 0.99529 |
| 1375.19452 | 0.99358 | 1375.19452 | 0.99541 |
| 1373.26578 | 0.99383 | 1373.26578 | 0.99557 |
| 1371.33704 | 0.99412 | 1371.33704 | 0.99576 |
| 1369.40829 | 0.99445 | 1369.40829 | 0.996 |
| 1367.47955 | 0.99481 | 1367.47955 | 0.99627 |
| 1365.5508 | 0.99516 | 1365.5508 | 0.99652 |
| 1363.62206 | 0.99553 | 1363.62206 | 0.9968 |
| 1361.69332 | 0.99593 | 1361.69332 | 0.9971 |
| 1359.76457 | 0.99628 | 1359.76457 | 0.99737 |
| 1357.83583 | 0.99656 | 1357.83583 | 0.99758 |
| 1355.90708 | 0.99676 | 1355.90708 | 0.99773 |
| 1353.97834 | 0.99699 | 1353.97834 | 0.99791 |
| 1352.0496 | 0.9973 | 1352.0496 | 0.99817 |
| 1350.12085 | 0.99761 | 1350.12085 | 0.99843 |
| 1348.19211 | 0.99782 | 1348.19211 | 0.99857 |
| 1346.26336 | 0.99795 | 1346.26336 | 0.99864 |
| 1344.33462 | 0.99809 | 1344.33462 | 0.99871 |
| 1342.40588 | 0.99826 | 1342.40588 | 0.99881 |
| 1340.47713 | 0.99845 | 1340.47713 | 0.99892 |
| 1338.54839 | 0.99863 | 1338.54839 | 0.99903 |
| 1336.61964 | 0.99875 | 1336.61964 | 0.99909 |
| 1334.6909 | 0.9988 | 1334.6909 | 0.99909 |
| 1332.76216 | 0.99884 | 1332.76216 | 0.99909 |
| 1330.83341 | 0.99893 | 1330.83341 | 0.99914 |
| 1328.90467 | 0.99904 | 1328.90467 | 0.99921 |
| 1326.97592 | 0.99914 | 1326.97592 | 0.99928 |
| 1325.04718 | 0.99916 | 1325.04718 | 0.99927 |
| 1323.11843 | 0.99905 | 1323.11843 | 0.99917 |
| 1321.18969 | 0.99891 | 1321.18969 | 0.99904 |
| 1319.26095 | 0.99885 | 1319.26095 | 0.99897 |
| 1317.3322 | 0.99886 | 1317.3322 | 0.99896 |
| 1315.40346 | 0.99891 | 1315.40346 | 0.99898 |
| 1313.47471 | 0.99898 | 1313.47471 | 0.99903 |
| 1311.54597 | 0.99905 | 1311.54597 | 0.99911 |
| 1309.61723 | 0.9991 | 1309.61723 | 0.99918 |
| 1307.68848 | 0.99914 | 1307.68848 | 0.99925 |
| 1305.75974 | 0.99919 | 1305.75974 | 0.99932 |
| 1303.83099 | 0.99925 | 1303.83099 | 0.99939 |
| 1301.90225 | 0.99928 | 1301.90225 | 0.99941 |
| 1299.97351 | 0.99921 | 1299.97351 | 0.99936 |
| 1298.04476 | 0.99907 | 1298.04476 | 0.99926 |
| 1296.11602 | 0.99892 | 1296.11602 | 0.99918 |
| 1294.18727 | 0.9988 | 1294.18727 | 0.99913 |
| 1292.25853 | 0.99869 | 1292.25853 | 0.99909 |
| 1290.32979 | 0.99857 | 1290.32979 | 0.99905 |
| 1288.40104 | 0.99844 | 1288.40104 | 0.999 |
| 1286.4723 | 0.99829 | 1286.4723 | 0.99895 |
| 1284.54355 | 0.99814 | 1284.54355 | 0.9989 |
| 1282.61481 | 0.99797 | 1282.61481 | 0.99884 |
| 1280.68607 | 0.99778 | 1280.68607 | 0.99874 |
| 1278.75732 | 0.99756 | 1278.75732 | 0.99862 |
| 1276.82858 | 0.99734 | 1276.82858 | 0.99848 |
| 1274.89983 | 0.99712 | 1274.89983 | 0.99834 |
| 1272.97109 | 0.99692 | 1272.97109 | 0.99821 |
| 1271.04234 | 0.99675 | 1271.04234 | 0.9981 |
| 1269.1136 | 0.99663 | 1269.1136 | 0.99801 |
| 1267.18486 | 0.99654 | 1267.18486 | 0.99795 |
| 1265.25611 | 0.9965 | 1265.25611 | 0.99792 |
| 1263.32737 | 0.9965 | 1263.32737 | 0.99792 |
| 1261.39862 | 0.99655 | 1261.39862 | 0.99796 |
| 1259.46988 | 0.99663 | 1259.46988 | 0.99801 |
| 1257.54114 | 0.99673 | 1257.54114 | 0.99809 |
| 1255.61239 | 0.99686 | 1255.61239 | 0.99817 |
| 1253.68365 | 0.997 | 1253.68365 | 0.99826 |
| 1251.7549 | 0.99715 | 1251.7549 | 0.99835 |
| 1249.82616 | 0.99731 | 1249.82616 | 0.99845 |
| 1247.89742 | 0.99747 | 1247.89742 | 0.99855 |
| 1245.96867 | 0.99766 | 1245.96867 | 0.99867 |
| 1244.03993 | 0.99786 | 1244.03993 | 0.9988 |
| 1242.11118 | 0.99808 | 1242.11118 | 0.99893 |
| 1240.18244 | 0.9983 | 1240.18244 | 0.99907 |
| 1238.2537 | 0.99852 | 1238.2537 | 0.99919 |
| 1236.32495 | 0.99873 | 1236.32495 | 0.99932 |
| 1234.39621 | 0.99891 | 1234.39621 | 0.99942 |
| 1232.46746 | 0.99908 | 1232.46746 | 0.9995 |
| 1230.53872 | 0.99923 | 1230.53872 | 0.99955 |
| 1228.60998 | 0.99937 | 1228.60998 | 0.99958 |
| 1226.68123 | 0.99949 | 1226.68123 | 0.99958 |
| 1224.75249 | 0.99958 | 1224.75249 | 0.99957 |
| 1222.82374 | 0.99964 | 1222.82374 | 0.99955 |
| 1220.895 | 0.99967 | 1220.895 | 0.99951 |
| 1218.96625 | 0.99971 | 1218.96625 | 0.99947 |
| 1217.03751 | 0.99975 | 1217.03751 | 0.99944 |
| 1215.10877 | 0.9998 | 1215.10877 | 0.99942 |
| 1213.18002 | 0.99984 | 1213.18002 | 0.9994 |
| 1211.25128 | 0.99987 | 1211.25128 | 0.99939 |
| 1209.32253 | 0.99988 | 1209.32253 | 0.99938 |
| 1207.39379 | 0.99989 | 1207.39379 | 0.99937 |
| 1205.46505 | 0.9999 | 1205.46505 | 0.99935 |
| 1203.5363 | 0.99991 | 1203.5363 | 0.99934 |
| 1201.60756 | 0.99991 | 1201.60756 | 0.99934 |
| 1199.67881 | 0.9999 | 1199.67881 | 0.99934 |
| 1197.75007 | 0.9999 | 1197.75007 | 0.99934 |
| 1195.82133 | 0.9999 | 1195.82133 | 0.99936 |
| 1193.89258 | 0.9999 | 1193.89258 | 0.99938 |
| 1191.96384 | 0.99991 | 1191.96384 | 0.9994 |
| 1190.03509 | 0.99993 | 1190.03509 | 0.99943 |
| 1188.10635 | 0.99994 | 1188.10635 | 0.99947 |
| 1186.17761 | 0.99995 | 1186.17761 | 0.99951 |
| 1184.24886 | 0.99995 | 1184.24886 | 0.99954 |
| 1182.32012 | 0.99994 | 1182.32012 | 0.99957 |
| 1180.39137 | 0.99993 | 1180.39137 | 0.99958 |
| 1178.46263 | 0.99992 | 1178.46263 | 0.99959 |
| 1176.53389 | 0.99992 | 1176.53389 | 0.9996 |
| 1174.60514 | 0.9999 | 1174.60514 | 0.9996 |
| 1172.6764 | 0.9999 | 1172.6764 | 0.99961 |
| 1170.74765 | 0.99991 | 1170.74765 | 0.99962 |
| 1168.81891 | 0.99995 | 1168.81891 | 0.99963 |
| 1166.89016 | 0.99999 | 1166.89016 | 0.99961 |
| 1164.96142 | 1.00002 | 1164.96142 | 0.99956 |
| 1163.03268 | 1.00003 | 1163.03268 | 0.99948 |
| 1161.10393 | 1.00001 | 1161.10393 | 0.99935 |
| 1159.17519 | 0.99996 | 1159.17519 | 0.99919 |
| 1157.24644 | 0.99988 | 1157.24644 | 0.99898 |
| 1155.3177 | 0.99978 | 1155.3177 | 0.99873 |
| 1153.38896 | 0.99966 | 1153.38896 | 0.99843 |
| 1151.46021 | 0.9995 | 1151.46021 | 0.99809 |
| 1149.53147 | 0.99931 | 1149.53147 | 0.99771 |
| 1147.60272 | 0.9991 | 1147.60272 | 0.99732 |
| 1145.67398 | 0.99888 | 1145.67398 | 0.99691 |
| 1143.74524 | 0.99866 | 1143.74524 | 0.99651 |
| 1141.81649 | 0.99843 | 1141.81649 | 0.9961 |
| 1139.88775 | 0.9982 | 1139.88775 | 0.9957 |
| 1137.959 | 0.99799 | 1137.959 | 0.99532 |
| 1136.03026 | 0.99777 | 1136.03026 | 0.99496 |
| 1134.10152 | 0.99756 | 1134.10152 | 0.99461 |
| 1132.17277 | 0.99734 | 1132.17277 | 0.99428 |
| 1130.24403 | 0.99712 | 1130.24403 | 0.99397 |
| 1128.31528 | 0.99689 | 1128.31528 | 0.99369 |
| 1126.38654 | 0.99665 | 1126.38654 | 0.99344 |
| 1124.4578 | 0.99639 | 1124.4578 | 0.9932 |
| 1122.52905 | 0.99613 | 1122.52905 | 0.993 |
| 1120.60031 | 0.99588 | 1120.60031 | 0.99281 |
| 1118.67156 | 0.99563 | 1118.67156 | 0.99267 |
| 1116.74282 | 0.99538 | 1116.74282 | 0.99257 |
| 1114.81407 | 0.99514 | 1114.81407 | 0.99249 |
| 1112.88533 | 0.99489 | 1112.88533 | 0.99245 |
| 1110.95659 | 0.99466 | 1110.95659 | 0.99244 |
| 1109.02784 | 0.99444 | 1109.02784 | 0.99244 |
| 1107.0991 | 0.99426 | 1107.0991 | 0.99248 |
| 1105.17035 | 0.99411 | 1105.17035 | 0.99254 |
| 1103.24161 | 0.99398 | 1103.24161 | 0.99263 |
| 1101.31287 | 0.99388 | 1101.31287 | 0.99276 |
| 1099.38412 | 0.99381 | 1099.38412 | 0.99291 |
| 1097.45538 | 0.99378 | 1097.45538 | 0.99307 |
| 1095.52663 | 0.99379 | 1095.52663 | 0.99323 |
| 1093.59789 | 0.99383 | 1093.59789 | 0.99339 |
| 1091.66915 | 0.99386 | 1091.66915 | 0.99352 |
| 1089.7404 | 0.99385 | 1089.7404 | 0.99361 |
| 1087.81166 | 0.99378 | 1087.81166 | 0.99366 |
| 1085.88291 | 0.99363 | 1085.88291 | 0.99365 |
| 1083.95417 | 0.99342 | 1083.95417 | 0.99359 |
| 1082.02543 | 0.99315 | 1082.02543 | 0.99349 |
| 1080.09668 | 0.99283 | 1080.09668 | 0.99336 |
| 1078.16794 | 0.99248 | 1078.16794 | 0.9932 |
| 1076.23919 | 0.9921 | 1076.23919 | 0.993 |
| 1074.31045 | 0.99169 | 1074.31045 | 0.99279 |
| 1072.38171 | 0.99127 | 1072.38171 | 0.99255 |
| 1070.45296 | 0.99087 | 1070.45296 | 0.99231 |
| 1068.52422 | 0.99051 | 1068.52422 | 0.99208 |
| 1066.59547 | 0.99019 | 1066.59547 | 0.99185 |
| 1064.66673 | 0.98991 | 1064.66673 | 0.99164 |
| 1062.73798 | 0.98967 | 1062.73798 | 0.99145 |
| 1060.80924 | 0.98947 | 1060.80924 | 0.99128 |
| 1058.8805 | 0.9893 | 1058.8805 | 0.99112 |
| 1056.95175 | 0.98918 | 1056.95175 | 0.99099 |
| 1055.02301 | 0.9891 | 1055.02301 | 0.9909 |
| 1053.09426 | 0.98906 | 1053.09426 | 0.99084 |
| 1051.16552 | 0.98905 | 1051.16552 | 0.99082 |
| 1049.23678 | 0.98909 | 1049.23678 | 0.99084 |
| 1047.30803 | 0.98916 | 1047.30803 | 0.99089 |
| 1045.37929 | 0.98927 | 1045.37929 | 0.99097 |
| 1043.45054 | 0.98943 | 1043.45054 | 0.99109 |
| 1041.5218 | 0.98964 | 1041.5218 | 0.99125 |
| 1039.59306 | 0.98989 | 1039.59306 | 0.99144 |
| 1037.66431 | 0.99019 | 1037.66431 | 0.99166 |
| 1035.73557 | 0.99053 | 1035.73557 | 0.99189 |
| 1033.80682 | 0.99093 | 1033.80682 | 0.99216 |
| 1031.87808 | 0.99138 | 1031.87808 | 0.99245 |
| 1029.94934 | 0.99189 | 1029.94934 | 0.99276 |
| 1028.02059 | 0.99243 | 1028.02059 | 0.99309 |
| 1026.09185 | 0.993 | 1026.09185 | 0.99345 |
| 1024.1631 | 0.99361 | 1024.1631 | 0.99382 |
| 1022.23436 | 0.99424 | 1022.23436 | 0.99419 |
| 1020.30562 | 0.99487 | 1020.30562 | 0.99455 |
| 1018.37687 | 0.99549 | 1018.37687 | 0.99491 |
| 1016.44813 | 0.99606 | 1016.44813 | 0.99526 |
| 1014.51938 | 0.99659 | 1014.51938 | 0.9956 |
| 1012.59064 | 0.99704 | 1012.59064 | 0.99592 |
| 1010.66189 | 0.99742 | 1010.66189 | 0.99623 |
| 1008.73315 | 0.99774 | 1008.73315 | 0.99651 |
| 1006.80441 | 0.99803 | 1006.80441 | 0.9968 |
| 1004.87566 | 0.9983 | 1004.87566 | 0.99708 |
| 1002.94692 | 0.99854 | 1002.94692 | 0.99735 |
| 1001.01817 | 0.99876 | 1001.01817 | 0.9976 |
| 999.08943 | 0.99896 | 999.08943 | 0.99784 |
| 997.16069 | 0.99913 | 997.16069 | 0.99806 |
| 995.23194 | 0.99929 | 995.23194 | 0.99827 |
| 993.3032 | 0.99946 | 993.3032 | 0.99846 |
| 991.37445 | 0.99962 | 991.37445 | 0.99865 |
| 989.44571 | 0.99977 | 989.44571 | 0.99884 |
| 987.51697 | 0.9999 | 987.51697 | 0.99901 |
| 985.58822 | 1 | 985.58822 | 0.99918 |
| 983.65948 | 1.00009 | 983.65948 | 0.99935 |
| 981.73073 | 1.00019 | 981.73073 | 0.99952 |
| 979.80199 | 1.00028 | 979.80199 | 0.99969 |
| 977.87325 | 1.00037 | 977.87325 | 0.99987 |
| 975.9445 | 1.00044 | 975.9445 | 1.00004 |
| 974.01576 | 1.00049 | 974.01576 | 1.0002 |
| 972.08701 | 1.00052 | 972.08701 | 1.00036 |
| 970.15827 | 1.00055 | 970.15827 | 1.00049 |
| 968.22953 | 1.00058 | 968.22953 | 1.00062 |
| 966.30078 | 1.00061 | 966.30078 | 1.00074 |
| 964.37204 | 1.00065 | 964.37204 | 1.00086 |
| 962.44329 | 1.00067 | 962.44329 | 1.00096 |
| 960.51455 | 1.00068 | 960.51455 | 1.00104 |
| 958.5858 | 1.00069 | 958.5858 | 1.0011 |
| 956.65706 | 1.00068 | 956.65706 | 1.00114 |
| 954.72832 | 1.00067 | 954.72832 | 1.00116 |
| 952.79957 | 1.00065 | 952.79957 | 1.00116 |
| 950.87083 | 1.00061 | 950.87083 | 1.00116 |
| 948.94208 | 1.00057 | 948.94208 | 1.00114 |
| 947.01334 | 1.00053 | 947.01334 | 1.0011 |
| 945.0846 | 1.00049 | 945.0846 | 1.00105 |
| 943.15585 | 1.00046 | 943.15585 | 1.00101 |
| 941.22711 | 1.00043 | 941.22711 | 1.00097 |
| 939.29836 | 1.00039 | 939.29836 | 1.00093 |
| 937.36962 | 1.00035 | 937.36962 | 1.00089 |
| 935.44088 | 1.0003 | 935.44088 | 1.00084 |
| 933.51213 | 1.00026 | 933.51213 | 1.00079 |
| 931.58339 | 1.00023 | 931.58339 | 1.00074 |
| 929.65464 | 1.00022 | 929.65464 | 1.00069 |
| 927.7259 | 1.00021 | 927.7259 | 1.00066 |
| 925.79716 | 1.0002 | 925.79716 | 1.00063 |
| 923.86841 | 1.00019 | 923.86841 | 1.00061 |
| 921.93967 | 1.00018 | 921.93967 | 1.00059 |
| 920.01092 | 1.00018 | 920.01092 | 1.00057 |
| 918.08218 | 1.00017 | 918.08218 | 1.00057 |
| 916.15344 | 1.00015 | 916.15344 | 1.00056 |
| 914.22469 | 1.00012 | 914.22469 | 1.00056 |
| 912.29595 | 1.00007 | 912.29595 | 1.00057 |
| 910.3672 | 1.00002 | 910.3672 | 1.00058 |
| 908.43846 | 0.99996 | 908.43846 | 1.0006 |
| 906.50971 | 0.99993 | 906.50971 | 1.00063 |
| 904.58097 | 0.99991 | 904.58097 | 1.00067 |
| 902.65223 | 0.99989 | 902.65223 | 1.00072 |
| 900.72348 | 0.99987 | 900.72348 | 1.00077 |
| 898.79474 | 0.99986 | 898.79474 | 1.00081 |
| 896.86599 | 0.99985 | 896.86599 | 1.00084 |
| 894.93725 | 0.99985 | 894.93725 | 1.00088 |
| 893.00851 | 0.99984 | 893.00851 | 1.0009 |
| 891.07976 | 0.99984 | 891.07976 | 1.00092 |
| 889.15102 | 0.99982 | 889.15102 | 1.00093 |
| 887.22227 | 0.99979 | 887.22227 | 1.00091 |
| 885.29353 | 0.99976 | 885.29353 | 1.00087 |
| 883.36479 | 0.99972 | 883.36479 | 1.00081 |
| 881.43604 | 0.99967 | 881.43604 | 1.00072 |
| 879.5073 | 0.99963 | 879.5073 | 1.00062 |
| 877.57855 | 0.9996 | 877.57855 | 1.00053 |
| 875.64981 | 0.99959 | 875.64981 | 1.00044 |
| 873.72107 | 0.99959 | 873.72107 | 1.00035 |
| 871.79232 | 0.99962 | 871.79232 | 1.00026 |
| 869.86358 | 0.99967 | 869.86358 | 1.00018 |
| 867.93483 | 0.99974 | 867.93483 | 1.0001 |
| 866.00609 | 0.99982 | 866.00609 | 1.00004 |
| 864.07735 | 0.99991 | 864.07735 | 0.99998 |
| 862.1486 | 1 | 862.1486 | 0.99993 |
| 860.21986 | 1.0001 | 860.21986 | 0.99989 |
| 858.29111 | 1.00022 | 858.29111 | 0.99985 |
| 856.36237 | 1.00034 | 856.36237 | 0.9998 |
| 854.43362 | 1.00046 | 854.43362 | 0.99976 |
| 852.50488 | 1.00057 | 852.50488 | 0.99973 |
| 850.57614 | 1.00069 | 850.57614 | 0.9997 |
| 848.64739 | 1.00079 | 848.64739 | 0.99966 |
| 846.71865 | 1.00089 | 846.71865 | 0.99962 |
| 844.7899 | 1.00096 | 844.7899 | 0.99957 |
| 842.86116 | 1.001 | 842.86116 | 0.99951 |
| 840.93242 | 1.00102 | 840.93242 | 0.99943 |
| 839.00367 | 1.00102 | 839.00367 | 0.99935 |
| 837.07493 | 1.001 | 837.07493 | 0.99926 |
| 835.14618 | 1.00097 | 835.14618 | 0.99916 |
| 833.21744 | 1.00093 | 833.21744 | 0.99906 |
| 831.2887 | 1.00088 | 831.2887 | 0.99896 |
| 829.35995 | 1.00083 | 829.35995 | 0.99887 |
| 827.43121 | 1.00078 | 827.43121 | 0.99879 |
| 825.50246 | 1.00072 | 825.50246 | 0.9987 |
| 823.57372 | 1.00066 | 823.57372 | 0.99862 |
| 821.64498 | 1.00059 | 821.64498 | 0.99854 |
| 819.71623 | 1.00052 | 819.71623 | 0.99846 |
| 817.78749 | 1.00043 | 817.78749 | 0.99839 |
| 815.85874 | 1.00032 | 815.85874 | 0.99833 |
| 813.93 | 1.0002 | 813.93 | 0.99826 |
| 812.00126 | 1.00007 | 812.00126 | 0.99819 |
| 810.07251 | 0.99993 | 810.07251 | 0.99811 |
| 808.14377 | 0.99979 | 808.14377 | 0.99804 |
| 806.21502 | 0.99964 | 806.21502 | 0.99796 |
| 804.28628 | 0.99949 | 804.28628 | 0.99788 |
| 802.35753 | 0.99935 | 802.35753 | 0.99782 |
| 800.42879 | 0.99919 | 800.42879 | 0.99775 |
| 798.50005 | 0.99901 | 798.50005 | 0.99765 |
| 796.5713 | 0.99882 | 796.5713 | 0.99754 |
| 794.64256 | 0.99866 | 794.64256 | 0.99746 |
| 792.71381 | 0.99853 | 792.71381 | 0.99741 |
| 790.78507 | 0.99841 | 790.78507 | 0.99738 |
| 788.85633 | 0.99827 | 788.85633 | 0.99733 |
| 786.92758 | 0.99814 | 786.92758 | 0.99728 |
| 784.99884 | 0.99801 | 784.99884 | 0.99721 |
| 783.07009 | 0.99789 | 783.07009 | 0.99712 |
| 781.14135 | 0.99775 | 781.14135 | 0.997 |
| 779.21261 | 0.99759 | 779.21261 | 0.99687 |
| 777.28386 | 0.99741 | 777.28386 | 0.99671 |
| 775.35512 | 0.99722 | 775.35512 | 0.99651 |
| 773.42637 | 0.997 | 773.42637 | 0.99625 |
| 771.49763 | 0.99676 | 771.49763 | 0.99595 |
| 769.56889 | 0.9965 | 769.56889 | 0.99561 |
| 767.64014 | 0.99622 | 767.64014 | 0.99523 |
| 765.7114 | 0.99592 | 765.7114 | 0.99482 |
| 763.78265 | 0.9956 | 763.78265 | 0.99439 |
| 761.85391 | 0.99528 | 761.85391 | 0.99396 |
| 759.92517 | 0.99496 | 759.92517 | 0.99353 |
| 757.99642 | 0.99463 | 757.99642 | 0.99306 |
| 756.06768 | 0.99425 | 756.06768 | 0.99251 |
| 754.13893 | 0.99384 | 754.13893 | 0.99193 |
| 752.21019 | 0.99346 | 752.21019 | 0.99135 |
| 750.28144 | 0.99308 | 750.28144 | 0.99079 |
| 748.3527 | 0.9927 | 748.3527 | 0.99022 |
| 746.42396 | 0.99234 | 746.42396 | 0.98966 |
| 744.49521 | 0.99198 | 744.49521 | 0.98911 |
| 742.56647 | 0.99165 | 742.56647 | 0.98857 |
| 740.63772 | 0.99134 | 740.63772 | 0.98806 |
| 738.70898 | 0.99105 | 738.70898 | 0.98758 |
| 736.78024 | 0.99079 | 736.78024 | 0.98713 |
| 734.85149 | 0.99054 | 734.85149 | 0.98672 |
| 732.92275 | 0.99032 | 732.92275 | 0.98633 |
| 730.994 | 0.99012 | 730.994 | 0.98599 |
| 729.06526 | 0.98994 | 729.06526 | 0.98568 |
| 727.13652 | 0.98979 | 727.13652 | 0.98541 |
| 725.20777 | 0.98962 | 725.20777 | 0.98515 |
| 723.27903 | 0.98945 | 723.27903 | 0.98489 |
| 721.35028 | 0.98927 | 721.35028 | 0.98465 |
| 719.42154 | 0.98913 | 719.42154 | 0.98445 |
| 717.4928 | 0.989 | 717.4928 | 0.98428 |
| 715.56405 | 0.98884 | 715.56405 | 0.98411 |
| 713.63531 | 0.98864 | 713.63531 | 0.9839 |
| 711.70656 | 0.98849 | 711.70656 | 0.98373 |
| 709.77782 | 0.98852 | 709.77782 | 0.98375 |
| 707.84908 | 0.9887 | 707.84908 | 0.98396 |
| 705.92033 | 0.98854 | 705.92033 | 0.98383 |
| 703.99159 | 0.98799 | 703.99159 | 0.98331 |
| 702.06284 | 0.98739 | 702.06284 | 0.98273 |
| 700.1341 | 0.98685 | 700.1341 | 0.98221 |
| 698.20535 | 0.98637 | 698.20535 | 0.98174 |
| 696.27661 | 0.98593 | 696.27661 | 0.98129 |
| 694.34787 | 0.98551 | 694.34787 | 0.98087 |
| 692.41912 | 0.9851 | 692.41912 | 0.98049 |
| 690.49038 | 0.98471 | 690.49038 | 0.98012 |
| 688.56163 | 0.98434 | 688.56163 | 0.97977 |
| 686.63289 | 0.98398 | 686.63289 | 0.9794 |
| 684.70415 | 0.9836 | 684.70415 | 0.97899 |
| 682.7754 | 0.9832 | 682.7754 | 0.97852 |
| 680.84666 | 0.98278 | 680.84666 | 0.97801 |
| 678.91791 | 0.98237 | 678.91791 | 0.97751 |
| 676.98917 | 0.98194 | 676.98917 | 0.97694 |
| 675.06043 | 0.98152 | 675.06043 | 0.97631 |
| 673.13168 | 0.9811 | 673.13168 | 0.97564 |
| 671.20294 | 0.98073 | 671.20294 | 0.97495 |
| 669.27419 | 0.98041 | 669.27419 | 0.9743 |
| 667.34545 | 0.98016 | 667.34545 | 0.97371 |
| 665.41671 | 0.97999 | 665.41671 | 0.97322 |
| 663.48796 | 0.97992 | 663.48796 | 0.97286 |
| 661.55922 | 0.97993 | 661.55922 | 0.97264 |
| 659.63047 | 0.98008 | 659.63047 | 0.97259 |
| 657.70173 | 0.98038 | 657.70173 | 0.97274 |
| 655.77299 | 0.98083 | 655.77299 | 0.97305 |
| 653.84424 | 0.98135 | 653.84424 | 0.97347 |
| 651.9155 | 0.9819 | 651.9155 | 0.97397 |
| 649.98675 | 0.9825 | 649.98675 | 0.9746 |
| 648.05801 | 0.98316 | 648.05801 | 0.97535 |
| 646.12926 | 0.98391 | 646.12926 | 0.97622 |
| 644.20052 | 0.98475 | 644.20052 | 0.97722 |
| 642.27178 | 0.98567 | 642.27178 | 0.97835 |
| 640.34303 | 0.98667 | 640.34303 | 0.97961 |
| 638.41429 | 0.98773 | 638.41429 | 0.98099 |
| 636.48554 | 0.98885 | 636.48554 | 0.98245 |
| 634.5568 | 0.99001 | 634.5568 | 0.98402 |
| 632.62806 | 0.99117 | 632.62806 | 0.98563 |
| 630.69931 | 0.9921 | 630.69931 | 0.98706 |
| 628.77057 | 0.99269 | 628.77057 | 0.98817 |
| 626.84182 | 0.99339 | 626.84182 | 0.98944 |
| 624.91308 | 0.99438 | 624.91308 | 0.99104 |
| 622.98434 | 0.99544 | 622.98434 | 0.99271 |
| 621.05559 | 0.99644 | 621.05559 | 0.9943 |
| 619.12685 | 0.99734 | 619.12685 | 0.99575 |
| 617.1981 | 0.99812 | 617.1981 | 0.99705 |
| 615.26936 | 0.99875 | 615.26936 | 0.99815 |
| 613.34062 | 0.99919 | 613.34062 | 0.999 |
| 611.41187 | 0.99941 | 611.41187 | 0.99954 |
| 609.48313 | 0.99939 | 609.48313 | 0.99972 |
| 607.55438 | 0.99915 | 607.55438 | 0.99954 |
| 605.62564 | 0.99867 | 605.62564 | 0.99897 |
| 603.6969 | 0.99794 | 603.6969 | 0.99799 |
| 601.76815 | 0.9969 | 601.76815 | 0.99652 |
| 599.83941 | 0.99555 | 599.83941 | 0.99455 |
| 597.91066 | 0.994 | 597.91066 | 0.99222 |
| 595.98192 | 0.99225 | 595.98192 | 0.98956 |
| 594.05317 | 0.99029 | 594.05317 | 0.98659 |
| 592.12443 | 0.98812 | 592.12443 | 0.98332 |
| 590.19569 | 0.98576 | 590.19569 | 0.97975 |
| 588.26694 | 0.98323 | 588.26694 | 0.97588 |
| 586.3382 | 0.98053 | 586.3382 | 0.97174 |
| 584.40945 | 0.9777 | 584.40945 | 0.96736 |
| 582.48071 | 0.97476 | 582.48071 | 0.96279 |
| 580.55197 | 0.97168 | 580.55197 | 0.95805 |
| 578.62322 | 0.96845 | 578.62322 | 0.95312 |
| 576.69448 | 0.9651 | 576.69448 | 0.94803 |
| 574.76573 | 0.96169 | 574.76573 | 0.94285 |
| 572.83699 | 0.95829 | 572.83699 | 0.93765 |
| 570.90825 | 0.95492 | 570.90825 | 0.93245 |
| 568.9795 | 0.95161 | 568.9795 | 0.92733 |
| 567.05076 | 0.94836 | 567.05076 | 0.92233 |
| 565.12201 | 0.94519 | 565.12201 | 0.91748 |
| 563.19327 | 0.94208 | 563.19327 | 0.9128 |
| 561.26453 | 0.93905 | 561.26453 | 0.90833 |
| 559.33578 | 0.93618 | 559.33578 | 0.90414 |
| 557.40704 | 0.93353 | 557.40704 | 0.90029 |
| 555.47829 | 0.93108 | 555.47829 | 0.89678 |
| 553.54955 | 0.92882 | 553.54955 | 0.89359 |
| 551.62081 | 0.92674 | 551.62081 | 0.89073 |
| 549.69206 | 0.92491 | 549.69206 | 0.88823 |
| 547.76332 | 0.92333 | 547.76332 | 0.88612 |
| 545.83457 | 0.92201 | 545.83457 | 0.88438 |
| 543.90583 | 0.92094 | 543.90583 | 0.88298 |
| 541.97708 | 0.92008 | 541.97708 | 0.88196 |
| 540.04834 | 0.91938 | 540.04834 | 0.88126 |
| 538.1196 | 0.91884 | 538.1196 | 0.88083 |
| 536.19085 | 0.91848 | 536.19085 | 0.88062 |
| 534.26211 | 0.91835 | 534.26211 | 0.88065 |
| 532.33336 | 0.91845 | 532.33336 | 0.88093 |
| 530.40462 | 0.91873 | 530.40462 | 0.88145 |
| 528.47588 | 0.91912 | 528.47588 | 0.88221 |
| 526.54713 | 0.91958 | 526.54713 | 0.88315 |
| 524.61839 | 0.92014 | 524.61839 | 0.88424 |
| 522.68964 | 0.92084 | 522.68964 | 0.88546 |
| 520.7609 | 0.92165 | 520.7609 | 0.88685 |
| 518.83216 | 0.92252 | 518.83216 | 0.88835 |
| 516.90341 | 0.92343 | 516.90341 | 0.88988 |
| 514.97467 | 0.92439 | 514.97467 | 0.89138 |
| 513.04592 | 0.92536 | 513.04592 | 0.89283 |
| 511.11718 | 0.92634 | 511.11718 | 0.89427 |
| 509.18844 | 0.92732 | 509.18844 | 0.89579 |
| 507.25969 | 0.9283 | 507.25969 | 0.89741 |
| 505.33095 | 0.92924 | 505.33095 | 0.89906 |
| 503.4022 | 0.93018 | 503.4022 | 0.90065 |
| 501.47346 | 0.93119 | 501.47346 | 0.90218 |
| 499.54472 | 0.93227 | 499.54472 | 0.90369 |
| 497.61597 | 0.93342 | 497.61597 | 0.90522 |
| 495.68723 | 0.93452 | 495.68723 | 0.90678 |
| 493.75848 | 0.9355 | 493.75848 | 0.90832 |
| 491.82974 | 0.93642 | 491.82974 | 0.90978 |
| 489.90099 | 0.93734 | 489.90099 | 0.91118 |
| 487.97225 | 0.93826 | 487.97225 | 0.91252 |
| 486.04351 | 0.9392 | 486.04351 | 0.91391 |
| 484.11476 | 0.94018 | 484.11476 | 0.91539 |
| 482.18602 | 0.94117 | 482.18602 | 0.91685 |
| 480.25727 | 0.94209 | 480.25727 | 0.91823 |
| 478.32853 | 0.94295 | 478.32853 | 0.91956 |
| 476.39979 | 0.94383 | 476.39979 | 0.9209 |
| 474.47104 | 0.94477 | 474.47104 | 0.92221 |
| 472.5423 | 0.94571 | 472.5423 | 0.92353 |
| 470.61355 | 0.94662 | 470.61355 | 0.92486 |
| 468.68481 | 0.94756 | 468.68481 | 0.92618 |
| 466.75607 | 0.94859 | 466.75607 | 0.92756 |
| 464.82732 | 0.94967 | 464.82732 | 0.92908 |
| 462.89858 | 0.95077 | 462.89858 | 0.93064 |
| 460.96983 | 0.95194 | 460.96983 | 0.93213 |
| 459.04109 | 0.95321 | 459.04109 | 0.9337 |
| 457.11235 | 0.95447 | 457.11235 | 0.93535 |
| 455.1836 | 0.95546 | 455.1836 | 0.93694 |
| 453.25486 | 0.95622 | 453.25486 | 0.93848 |
| 451.32611 | 0.95691 | 451.32611 | 0.94004 |
| 449.39737 | 0.95768 | 449.39737 | 0.94158 |
| 447.46863 | 0.95852 | 447.46863 | 0.94306 |
| 445.53988 | 0.95937 | 445.53988 | 0.94463 |
| 443.61114 | 0.96025 | 443.61114 | 0.94637 |
| 441.68239 | 0.96115 | 441.68239 | 0.94821 |
| 439.75365 | 0.96218 | 439.75365 | 0.95008 |
| 437.8249 | 0.96334 | 437.8249 | 0.95209 |
| 435.89616 | 0.96469 | 435.89616 | 0.95414 |
| 433.96742 | 0.96609 | 433.96742 | 0.95625 |
| 432.03867 | 0.96754 | 432.03867 | 0.95842 |
| 430.10993 | 0.96905 | 430.10993 | 0.96065 |
| 428.18118 | 0.9706 | 428.18118 | 0.96294 |
| 426.25244 | 0.9722 | 426.25244 | 0.96529 |
| 424.3237 | 0.97385 | 424.3237 | 0.96769 |
| 422.39495 | 0.97555 | 422.39495 | 0.97015 |
| 420.46621 | 0.9773 | 420.46621 | 0.97267 |
| 418.53746 | 0.9791 | 418.53746 | 0.97525 |
| 416.60872 | 0.98095 | 416.60872 | 0.97789 |
| 414.67998 | 0.98285 | 414.67998 | 0.98058 |
| 412.75123 | 0.9848 | 412.75123 | 0.98334 |
| 410.82249 | 0.9868 | 410.82249 | 0.98615 |
| 408.89374 | 0.98884 | 408.89374 | 0.98902 |
| 406.965 | 0.99094 | 406.965 | 0.99194 |
| 405.03626 | 0.99309 | 405.03626 | 0.99493 |
| 403.10751 | 0.99529 | 403.10751 | 0.99797 |
| 401.17877 | 0.99753 | 401.17877 | 1.00108 |
| 399.25002 | 0.99983 | 399.25002 | 1.00424 |

Fig. 3 XRD patterns of PA6/CeO2 composite fibers with the different concentration of CeO2 （a）0wt.% （b）3wt.% （c）5wt.% （d）7wt.% （e）9wt.%

| （a） | | （b） | | （c） | | （d） | | （e） | |
| --- | --- | --- | --- | --- | --- | --- | --- | --- | --- |
| 2Theta | Intensity | 2Theta | Intensity | 2Theta | Intensity | 2Theta | Intensity | 2Theta | Intensity |
| 5 | 249.03963 | 5 | 285.21449 | 5 | 271.48023 | 5 | 242.17061 | 5 | 235.69244 |
| 5.02 | 249.43393 | 5.02 | 285.05964 | 5.02 | 268.71104 | 5.02 | 240.31075 | 5.02 | 233.68536 |
| 5.04 | 249.78042 | 5.04 | 284.89206 | 5.04 | 266.02277 | 5.04 | 238.48549 | 5.04 | 231.71655 |
| 5.06 | 250.07912 | 5.06 | 284.71175 | 5.06 | 263.41542 | 5.06 | 236.69484 | 5.06 | 229.78602 |
| 5.08 | 250.33002 | 5.08 | 284.5187 | 5.08 | 260.889 | 5.08 | 234.93879 | 5.08 | 227.89376 |
| 5.1 | 250.53312 | 5.1 | 284.31292 | 5.1 | 258.4435 | 5.1 | 233.21734 | 5.1 | 226.03977 |
| 5.12 | 250.68842 | 5.12 | 284.0944 | 5.12 | 256.07892 | 5.12 | 231.5305 | 5.12 | 224.22406 |
| 5.14 | 250.79592 | 5.14 | 283.86315 | 5.14 | 253.79527 | 5.14 | 229.87826 | 5.14 | 222.44662 |
| 5.16 | 250.85563 | 5.16 | 283.61917 | 5.16 | 251.59254 | 5.16 | 228.26062 | 5.16 | 220.70745 |
| 5.18 | 250.86753 | 5.18 | 283.36246 | 5.18 | 249.47073 | 5.18 | 226.67759 | 5.18 | 219.00656 |
| 5.2 | 250.83163 | 5.2 | 283.09301 | 5.2 | 247.42985 | 5.2 | 225.12917 | 5.2 | 217.34394 |
| 5.22 | 250.74794 | 5.22 | 282.81083 | 5.22 | 245.46988 | 5.22 | 223.61534 | 5.22 | 215.71959 |
| 5.24 | 250.61645 | 5.24 | 282.51591 | 5.24 | 243.59085 | 5.24 | 222.13612 | 5.24 | 214.13352 |
| 5.26 | 250.43716 | 5.26 | 282.20826 | 5.26 | 241.79273 | 5.26 | 220.69151 | 5.26 | 212.58572 |
| 5.28 | 250.21007 | 5.28 | 281.88788 | 5.28 | 240.07554 | 5.28 | 219.28149 | 5.28 | 211.0762 |
| 5.3 | 249.93518 | 5.3 | 281.55477 | 5.3 | 238.43927 | 5.3 | 217.90609 | 5.3 | 209.60494 |
| 5.32 | 249.61249 | 5.32 | 281.20892 | 5.32 | 236.88393 | 5.32 | 216.56528 | 5.32 | 208.17197 |
| 5.34 | 249.242 | 5.34 | 280.85033 | 5.34 | 235.40951 | 5.34 | 215.25908 | 5.34 | 206.77726 |
| 5.36 | 248.82371 | 5.36 | 280.47902 | 5.36 | 234.01601 | 5.36 | 213.98749 | 5.36 | 205.42083 |
| 5.38 | 248.35763 | 5.38 | 280.09497 | 5.38 | 232.70343 | 5.38 | 212.75049 | 5.38 | 204.10267 |
| 5.4 | 247.84374 | 5.4 | 279.69819 | 5.4 | 231.47178 | 5.4 | 211.5481 | 5.4 | 202.82278 |
| 5.42 | 247.28206 | 5.42 | 279.28867 | 5.42 | 230.32105 | 5.42 | 210.38032 | 5.42 | 201.58117 |
| 5.44 | 246.67258 | 5.44 | 278.86642 | 5.44 | 229.25124 | 5.44 | 209.24714 | 5.44 | 200.37783 |
| 5.46 | 246.0153 | 5.46 | 278.43144 | 5.46 | 228.26236 | 5.46 | 208.14856 | 5.46 | 199.21277 |
| 5.48 | 245.31022 | 5.48 | 277.98372 | 5.48 | 227.3544 | 5.48 | 207.08458 | 5.48 | 198.08598 |
| 5.5 | 244.55734 | 5.5 | 277.52327 | 5.5 | 226.52736 | 5.5 | 206.05521 | 5.5 | 196.99746 |
| 5.52 | 248.5795 | 5.52 | 278.39419 | 5.52 | 228.06949 | 5.52 | 204.22769 | 5.52 | 196.79341 |
| 5.54 | 246.52772 | 5.54 | 278.04403 | 5.54 | 228.12234 | 5.54 | 203.12159 | 5.54 | 195.50195 |
| 5.56 | 246.59358 | 5.56 | 279.77169 | 5.56 | 226.84921 | 5.56 | 203.52723 | 5.56 | 195.22277 |
| 5.58 | 245.54203 | 5.58 | 279.42439 | 5.58 | 224.94409 | 5.58 | 203.3783 | 5.58 | 193.85448 |
| 5.6 | 242.91797 | 5.6 | 277.38867 | 5.6 | 224.17588 | 5.6 | 203.84416 | 5.6 | 194.25521 |
| 5.62 | 241.30373 | 5.62 | 275.9698 | 5.62 | 225.44186 | 5.62 | 201.71727 | 5.62 | 195.33016 |
| 5.64 | 242.35508 | 5.64 | 276.03191 | 5.64 | 223.57377 | 5.64 | 203.92927 | 5.64 | 191.90728 |
| 5.66 | 238.81535 | 5.66 | 275.00586 | 5.66 | 224.28027 | 5.66 | 202.77766 | 5.66 | 192.36443 |
| 5.68 | 238.77419 | 5.68 | 275.70726 | 5.68 | 223.63981 | 5.68 | 202.44867 | 5.68 | 190.06634 |
| 5.7 | 235.73145 | 5.7 | 275.08948 | 5.7 | 222.16696 | 5.7 | 201.66233 | 5.7 | 188.19671 |
| 5.72 | 232.31063 | 5.72 | 273.58019 | 5.72 | 224.07358 | 5.72 | 200.79388 | 5.72 | 184.71099 |
| 5.74 | 232.02824 | 5.74 | 271.84215 | 5.74 | 224.41144 | 5.74 | 199.15682 | 5.74 | 186.0317 |
| 5.76 | 232.67359 | 5.76 | 269.92723 | 5.76 | 224.9069 | 5.76 | 198.24042 | 5.76 | 186.48906 |
| 5.78 | 232.78609 | 5.78 | 268.43457 | 5.78 | 225.86898 | 5.78 | 196.25017 | 5.78 | 189.2632 |
| 5.8 | 230.92894 | 5.8 | 267.04968 | 5.8 | 225.66077 | 5.8 | 194.33659 | 5.8 | 187.33243 |
| 5.82 | 227.8475 | 5.82 | 267.52459 | 5.82 | 221.6518 | 5.82 | 193.52628 | 5.82 | 189.71114 |
| 5.84 | 224.46841 | 5.84 | 267.29395 | 5.84 | 225.33686 | 5.84 | 195.07729 | 5.84 | 189.96729 |
| 5.86 | 220.90413 | 5.86 | 263.61286 | 5.86 | 223.7632 | 5.86 | 195.17187 | 5.86 | 190.70004 |
| 5.88 | 222.45627 | 5.88 | 263.21289 | 5.88 | 222.92836 | 5.88 | 195.01672 | 5.88 | 191.9626 |
| 5.9 | 220.90962 | 5.9 | 259.27509 | 5.9 | 223.55012 | 5.9 | 193.98104 | 5.9 | 193.66763 |
| 5.92 | 217.37593 | 5.92 | 256.08929 | 5.92 | 223.522 | 5.92 | 193.22981 | 5.92 | 194.96229 |
| 5.94 | 216.35023 | 5.94 | 255.09663 | 5.94 | 219.99909 | 5.94 | 193.66963 | 5.94 | 194.49288 |
| 5.96 | 213.68519 | 5.96 | 253.43353 | 5.96 | 220.51951 | 5.96 | 191.39191 | 5.96 | 194.83093 |
| 5.98 | 212.89411 | 5.98 | 253.76045 | 5.98 | 219.7022 | 5.98 | 191.43006 | 5.98 | 197.38782 |
| 6 | 211.10831 | 6 | 254.84579 | 6 | 220.75111 | 6 | 192.55222 | 6 | 196.74189 |
| 6.02 | 211.63552 | 6.02 | 252.27041 | 6.02 | 218.71049 | 6.02 | 192.27796 | 6.02 | 197.78079 |
| 6.04 | 213.9119 | 6.04 | 250.95705 | 6.04 | 220.97971 | 6.04 | 195.05984 | 6.04 | 198.25495 |
| 6.06 | 213.15064 | 6.06 | 250.87077 | 6.06 | 217.91358 | 6.06 | 195.03739 | 6.06 | 200.42527 |
| 6.08 | 209.7795 | 6.08 | 248.12891 | 6.08 | 218.14932 | 6.08 | 197.00895 | 6.08 | 200.22575 |
| 6.1 | 207.80323 | 6.1 | 247.28273 | 6.1 | 215.78952 | 6.1 | 197.55804 | 6.1 | 200.49019 |
| 6.12 | 206.24846 | 6.12 | 247.4375 | 6.12 | 214.21737 | 6.12 | 198.49594 | 6.12 | 200.75785 |
| 6.14 | 206.42323 | 6.14 | 246.19059 | 6.14 | 209.98077 | 6.14 | 200.24606 | 6.14 | 198.27442 |
| 6.16 | 204.7486 | 6.16 | 242.38227 | 6.16 | 208.95641 | 6.16 | 204.44357 | 6.16 | 198.42883 |
| 6.18 | 205.92908 | 6.18 | 241.09459 | 6.18 | 208.13984 | 6.18 | 206.31791 | 6.18 | 199.41356 |
| 6.2 | 206.72034 | 6.2 | 243.34546 | 6.2 | 208.21384 | 6.2 | 205.97475 | 6.2 | 199.09965 |
| 6.22 | 208.49558 | 6.22 | 242.12044 | 6.22 | 207.99468 | 6.22 | 209.75738 | 6.22 | 197.71287 |
| 6.24 | 206.488 | 6.24 | 242.84186 | 6.24 | 208.34972 | 6.24 | 208.93289 | 6.24 | 197.81687 |
| 6.26 | 207.53673 | 6.26 | 239.67548 | 6.26 | 209.08832 | 6.26 | 208.33888 | 6.26 | 198.96827 |
| 6.28 | 206.9931 | 6.28 | 239.13469 | 6.28 | 212.01063 | 6.28 | 208.44495 | 6.28 | 197.7895 |
| 6.3 | 208.67753 | 6.3 | 240.32233 | 6.3 | 213.88725 | 6.3 | 208.1263 | 6.3 | 199.35655 |
| 6.32 | 208.20639 | 6.32 | 236.57516 | 6.32 | 216.65159 | 6.32 | 205.11887 | 6.32 | 197.15058 |
| 6.34 | 209.94916 | 6.34 | 233.26347 | 6.34 | 219.95613 | 6.34 | 205.09055 | 6.34 | 197.34292 |
| 6.36 | 211.00734 | 6.36 | 232.95314 | 6.36 | 219.79059 | 6.36 | 203.89212 | 6.36 | 197.19059 |
| 6.38 | 208.94125 | 6.38 | 231.70019 | 6.38 | 221.3716 | 6.38 | 199.74971 | 6.38 | 195.32871 |
| 6.4 | 205.75468 | 6.4 | 231.92065 | 6.4 | 219.88592 | 6.4 | 198.74006 | 6.4 | 194.26772 |
| 6.42 | 203.59533 | 6.42 | 230.27054 | 6.42 | 218.67055 | 6.42 | 199.7846 | 6.42 | 193.72638 |
| 6.44 | 201.62473 | 6.44 | 226.87183 | 6.44 | 220.3227 | 6.44 | 197.27623 | 6.44 | 192.17483 |
| 6.46 | 200.32555 | 6.46 | 228.82563 | 6.46 | 221.58679 | 6.46 | 199.27323 | 6.46 | 191.21371 |
| 6.48 | 200.92767 | 6.48 | 224.58335 | 6.48 | 222.37974 | 6.48 | 200.72795 | 6.48 | 186.38913 |
| 6.5 | 202.63024 | 6.5 | 229.66009 | 6.5 | 222.90541 | 6.5 | 196.15383 | 6.5 | 184.23451 |
| 6.52 | 200.62755 | 6.52 | 230.64614 | 6.52 | 224.50509 | 6.52 | 194.28761 | 6.52 | 181.47115 |
| 6.54 | 199.88992 | 6.54 | 228.34068 | 6.54 | 222.87596 | 6.54 | 191.23696 | 6.54 | 178.65794 |
| 6.56 | 199.16683 | 6.56 | 227.44429 | 6.56 | 222.03035 | 6.56 | 191.60993 | 6.56 | 175.88231 |
| 6.58 | 197.47088 | 6.58 | 228.83731 | 6.58 | 219.63222 | 6.58 | 192.49481 | 6.58 | 174.2541 |
| 6.6 | 196.86667 | 6.6 | 228.30369 | 6.6 | 218.08311 | 6.6 | 191.87153 | 6.6 | 170.38444 |
| 6.62 | 196.55144 | 6.62 | 226.7944 | 6.62 | 217.31108 | 6.62 | 190.38225 | 6.62 | 167.92856 |
| 6.64 | 195.0584 | 6.64 | 227.98339 | 6.64 | 216.00452 | 6.64 | 189.69574 | 6.64 | 164.54984 |
| 6.66 | 192.14686 | 6.66 | 227.30502 | 6.66 | 215.96354 | 6.66 | 190.24293 | 6.66 | 165.69994 |
| 6.68 | 191.84033 | 6.68 | 231.44837 | 6.68 | 213.31474 | 6.68 | 188.07472 | 6.68 | 162.84541 |
| 6.7 | 189.0073 | 6.7 | 230.63144 | 6.7 | 213.59108 | 6.7 | 188.87031 | 6.7 | 162.44449 |
| 6.72 | 189.94108 | 6.72 | 227.32765 | 6.72 | 212.54385 | 6.72 | 188.9339 | 6.72 | 163.05097 |
| 6.74 | 190.00283 | 6.74 | 230.32186 | 6.74 | 208.95204 | 6.74 | 187.24644 | 6.74 | 163.3294 |
| 6.76 | 189.94924 | 6.76 | 231.14748 | 6.76 | 206.41708 | 6.76 | 186.22018 | 6.76 | 163.85887 |
| 6.78 | 185.8176 | 6.78 | 234.60718 | 6.78 | 206.00994 | 6.78 | 186.40102 | 6.78 | 161.1561 |
| 6.8 | 184.73944 | 6.8 | 234.08961 | 6.8 | 204.00292 | 6.8 | 185.51748 | 6.8 | 162.39281 |
| 6.82 | 185.61054 | 6.82 | 233.76835 | 6.82 | 204.8191 | 6.82 | 183.54765 | 6.82 | 167.21587 |
| 6.84 | 185.37157 | 6.84 | 233.44709 | 6.84 | 204.25795 | 6.84 | 183.07578 | 6.84 | 165.89192 |
| 6.86 | 186.90502 | 6.86 | 232.90009 | 6.86 | 200.65442 | 6.86 | 178.6021 | 6.86 | 167.46349 |
| 6.88 | 189.71711 | 6.88 | 235.23725 | 6.88 | 199.45962 | 6.88 | 176.86934 | 6.88 | 169.18191 |
| 6.9 | 187.51283 | 6.9 | 235.67667 | 6.9 | 195.07598 | 6.9 | 178.02189 | 6.9 | 168.67191 |
| 6.92 | 188.27614 | 6.92 | 237.76618 | 6.92 | 193.63354 | 6.92 | 178.93546 | 6.92 | 169.27931 |
| 6.94 | 188.00038 | 6.94 | 239.73945 | 6.94 | 195.45748 | 6.94 | 177.64194 | 6.94 | 168.52128 |
| 6.96 | 186.85746 | 6.96 | 241.77783 | 6.96 | 194.60845 | 6.96 | 174.30814 | 6.96 | 169.724 |
| 6.98 | 188.6597 | 6.98 | 241.99812 | 6.98 | 195.96294 | 6.98 | 172.89496 | 6.98 | 171.60758 |
| 7 | 188.5976 | 7 | 243.44343 | 7 | 194.4952 | 7 | 172.22188 | 7 | 170.57189 |
| 7.02 | 189.69236 | 7.02 | 244.03423 | 7.02 | 193.64791 | 7.02 | 173.5226 | 7.02 | 171.86147 |
| 7.04 | 190.1884 | 7.04 | 244.97668 | 7.04 | 195.64267 | 7.04 | 178.14029 | 7.04 | 172.99023 |
| 7.06 | 189.48435 | 7.06 | 243.66087 | 7.06 | 193.59619 | 7.06 | 178.98099 | 7.06 | 175.22317 |
| 7.08 | 189.74106 | 7.08 | 243.50138 | 7.08 | 193.33212 | 7.08 | 181.46521 | 7.08 | 176.74587 |
| 7.1 | 192.60729 | 7.1 | 241.4013 | 7.1 | 193.62621 | 7.1 | 181.21434 | 7.1 | 176.54842 |
| 7.12 | 192.52462 | 7.12 | 241.3528 | 7.12 | 193.68321 | 7.12 | 182.45577 | 7.12 | 178.36368 |
| 7.14 | 191.44646 | 7.14 | 239.20288 | 7.14 | 192.37703 | 7.14 | 184.28538 | 7.14 | 177.03391 |
| 7.16 | 189.59101 | 7.16 | 235.8487 | 7.16 | 194.89859 | 7.16 | 183.39938 | 7.16 | 180.82805 |
| 7.18 | 190.31583 | 7.18 | 235.92213 | 7.18 | 196.33482 | 7.18 | 180.58184 | 7.18 | 181.4683 |
| 7.2 | 188.66137 | 7.2 | 236.30434 | 7.2 | 195.22648 | 7.2 | 180.66414 | 7.2 | 180.50283 |
| 7.22 | 186.58657 | 7.22 | 235.38417 | 7.22 | 194.41521 | 7.22 | 181.72796 | 7.22 | 183.00743 |
| 7.24 | 185.82454 | 7.24 | 235.50706 | 7.24 | 196.89602 | 7.24 | 178.37171 | 7.24 | 185.17867 |
| 7.26 | 187.65526 | 7.26 | 236.14411 | 7.26 | 196.49022 | 7.26 | 177.48249 | 7.26 | 185.25717 |
| 7.28 | 188.95064 | 7.28 | 234.74678 | 7.28 | 197.52082 | 7.28 | 177.37885 | 7.28 | 186.69869 |
| 7.3 | 185.61534 | 7.3 | 232.6399 | 7.3 | 198.00082 | 7.3 | 176.02754 | 7.3 | 188.07887 |
| 7.32 | 185.20423 | 7.32 | 230.98848 | 7.32 | 200.33873 | 7.32 | 176.75066 | 7.32 | 187.01864 |
| 7.34 | 185.87846 | 7.34 | 228.0962 | 7.34 | 199.49932 | 7.34 | 177.06964 | 7.34 | 185.6175 |
| 7.36 | 183.79214 | 7.36 | 226.10747 | 7.36 | 199.40608 | 7.36 | 175.66209 | 7.36 | 184.44873 |
| 7.38 | 180.81169 | 7.38 | 224.30639 | 7.38 | 202.54131 | 7.38 | 176.22023 | 7.38 | 185.62261 |
| 7.4 | 179.80259 | 7.4 | 220.52827 | 7.4 | 200.87668 | 7.4 | 177.79179 | 7.4 | 185.57636 |
| 7.42 | 180.85792 | 7.42 | 220.63871 | 7.42 | 202.16154 | 7.42 | 177.73384 | 7.42 | 186.64473 |
| 7.44 | 182.61843 | 7.44 | 224.55084 | 7.44 | 204.01679 | 7.44 | 177.19135 | 7.44 | 185.27758 |
| 7.46 | 183.56372 | 7.46 | 225.21184 | 7.46 | 203.94147 | 7.46 | 175.25964 | 7.46 | 182.18331 |
| 7.48 | 185.62907 | 7.48 | 222.26858 | 7.48 | 203.308 | 7.48 | 174.43971 | 7.48 | 180.36616 |
| 7.5 | 182.8359 | 7.5 | 224.53401 | 7.5 | 203.48503 | 7.5 | 173.55672 | 7.5 | 184.1441 |
| 7.52 | 180.63011 | 7.52 | 222.68119 | 7.52 | 202.51917 | 7.52 | 176.69555 | 7.52 | 183.25053 |
| 7.54 | 181.01686 | 7.54 | 221.80425 | 7.54 | 200.61917 | 7.54 | 177.54305 | 7.54 | 179.98468 |
| 7.56 | 180.39603 | 7.56 | 224.4098 | 7.56 | 199.49193 | 7.56 | 178.67483 | 7.56 | 180.5566 |
| 7.58 | 180.22708 | 7.58 | 224.73426 | 7.58 | 199.54948 | 7.58 | 178.95361 | 7.58 | 179.41709 |
| 7.6 | 180.41243 | 7.6 | 225.71899 | 7.6 | 199.01603 | 7.6 | 178.00756 | 7.6 | 176.71621 |
| 7.62 | 179.85541 | 7.62 | 223.56626 | 7.62 | 197.75326 | 7.62 | 173.13053 | 7.62 | 178.08129 |
| 7.64 | 180.29125 | 7.64 | 225.31887 | 7.64 | 197.10224 | 7.64 | 172.95213 | 7.64 | 177.31174 |
| 7.66 | 180.48265 | 7.66 | 223.4887 | 7.66 | 196.22639 | 7.66 | 171.70258 | 7.66 | 178.69758 |
| 7.68 | 178.89279 | 7.68 | 225.07932 | 7.68 | 196.94025 | 7.68 | 170.20292 | 7.68 | 174.65821 |
| 7.7 | 178.92187 | 7.7 | 222.33766 | 7.7 | 195.32961 | 7.7 | 170.78788 | 7.7 | 173.54023 |
| 7.72 | 174.92257 | 7.72 | 221.14982 | 7.72 | 193.04812 | 7.72 | 165.05011 | 7.72 | 172.5874 |
| 7.74 | 173.89464 | 7.74 | 225.90946 | 7.74 | 195.65993 | 7.74 | 163.78151 | 7.74 | 172.69141 |
| 7.76 | 171.95708 | 7.76 | 223.30315 | 7.76 | 198.23868 | 7.76 | 162.13689 | 7.76 | 171.13306 |
| 7.78 | 167.43037 | 7.78 | 224.63368 | 7.78 | 198.45213 | 7.78 | 161.58686 | 7.78 | 171.92468 |
| 7.8 | 168.71617 | 7.8 | 222.31482 | 7.8 | 200.40329 | 7.8 | 160.24255 | 7.8 | 174.22483 |
| 7.82 | 168.60028 | 7.82 | 221.35423 | 7.82 | 203.02622 | 7.82 | 160.36807 | 7.82 | 169.27306 |
| 7.84 | 165.936 | 7.84 | 222.09077 | 7.84 | 202.44372 | 7.84 | 159.6274 | 7.84 | 166.4995 |
| 7.86 | 167.33299 | 7.86 | 221.61455 | 7.86 | 204.66439 | 7.86 | 158.51449 | 7.86 | 164.43905 |
| 7.88 | 166.01906 | 7.88 | 221.99396 | 7.88 | 207.4593 | 7.88 | 158.37805 | 7.88 | 163.52303 |
| 7.9 | 164.9743 | 7.9 | 222.62064 | 7.9 | 207.69657 | 7.9 | 158.65214 | 7.9 | 161.61302 |
| 7.92 | 165.05716 | 7.92 | 221.13984 | 7.92 | 212.02698 | 7.92 | 159.39942 | 7.92 | 162.02035 |
| 7.94 | 163.95917 | 7.94 | 218.57449 | 7.94 | 212.23348 | 7.94 | 158.3222 | 7.94 | 161.53884 |
| 7.96 | 163.29721 | 7.96 | 219.01429 | 7.96 | 212.55173 | 7.96 | 156.32329 | 7.96 | 160.73624 |
| 7.98 | 163.87782 | 7.98 | 217.22015 | 7.98 | 215.87855 | 7.98 | 160.57124 | 7.98 | 163.49735 |
| 8 | 163.20512 | 8 | 217.42815 | 8 | 214.89967 | 8 | 163.42295 | 8 | 162.63928 |
| 8.02 | 163.46184 | 8.02 | 216.99833 | 8.02 | 217.00371 | 8.02 | 165.56891 | 8.02 | 160.63923 |
| 8.04 | 165.50646 | 8.04 | 215.8988 | 8.04 | 217.37934 | 8.04 | 165.67556 | 8.04 | 161.44123 |
| 8.06 | 164.2388 | 8.06 | 216.8707 | 8.06 | 216.00785 | 8.06 | 161.99656 | 8.06 | 160.84608 |
| 8.08 | 164.25013 | 8.08 | 219.73827 | 8.08 | 214.97197 | 8.08 | 161.51656 | 8.08 | 159.76548 |
| 8.1 | 163.84222 | 8.1 | 217.49983 | 8.1 | 214.45856 | 8.1 | 160.46707 | 8.1 | 160.60222 |
| 8.12 | 163.33144 | 8.12 | 219.87437 | 8.12 | 212.99137 | 8.12 | 159.67845 | 8.12 | 161.90442 |
| 8.14 | 164.19216 | 8.14 | 220.87004 | 8.14 | 211.72276 | 8.14 | 160.09976 | 8.14 | 160.10937 |
| 8.16 | 165.62347 | 8.16 | 222.05938 | 8.16 | 212.63786 | 8.16 | 160.08466 | 8.16 | 159.94513 |
| 8.18 | 166.30864 | 8.18 | 223.21154 | 8.18 | 211.62257 | 8.18 | 161.87159 | 8.18 | 160.00366 |
| 8.2 | 164.18175 | 8.2 | 223.73626 | 8.2 | 208.75632 | 8.2 | 163.64985 | 8.2 | 162.63962 |
| 8.22 | 163.35689 | 8.22 | 224.63775 | 8.22 | 208.47716 | 8.22 | 165.48964 | 8.22 | 165.49831 |
| 8.24 | 166.41076 | 8.24 | 225.59021 | 8.24 | 209.83091 | 8.24 | 164.08529 | 8.24 | 167.46059 |
| 8.26 | 167.31094 | 8.26 | 224.86917 | 8.26 | 208.14138 | 8.26 | 165.62118 | 8.26 | 167.17781 |
| 8.28 | 166.40322 | 8.28 | 222.89971 | 8.28 | 207.56529 | 8.28 | 166.63648 | 8.28 | 169.18937 |
| 8.3 | 166.95214 | 8.3 | 225.65666 | 8.3 | 206.01431 | 8.3 | 166.83921 | 8.3 | 171.53067 |
| 8.32 | 169.36838 | 8.32 | 228.81886 | 8.32 | 205.38615 | 8.32 | 166.22745 | 8.32 | 172.6849 |
| 8.34 | 169.61962 | 8.34 | 229.11201 | 8.34 | 204.85554 | 8.34 | 166.32504 | 8.34 | 173.55861 |
| 8.36 | 169.64792 | 8.36 | 229.50346 | 8.36 | 202.5767 | 8.36 | 166.31598 | 8.36 | 177.0249 |
| 8.38 | 169.2219 | 8.38 | 232.66301 | 8.38 | 201.3413 | 8.38 | 166.9755 | 8.38 | 179.16406 |
| 8.4 | 171.28083 | 8.4 | 237.01643 | 8.4 | 198.60341 | 8.4 | 165.03096 | 8.4 | 177.42504 |
| 8.42 | 171.57549 | 8.42 | 240.39984 | 8.42 | 198.33839 | 8.42 | 165.38054 | 8.42 | 179.16461 |
| 8.44 | 173.29145 | 8.44 | 241.48158 | 8.44 | 197.49805 | 8.44 | 166.4166 | 8.44 | 177.59173 |
| 8.46 | 172.5421 | 8.46 | 239.38641 | 8.46 | 196.86101 | 8.46 | 168.61069 | 8.46 | 179.50419 |
| 8.48 | 173.59289 | 8.48 | 239.52702 | 8.48 | 194.66088 | 8.48 | 170.39783 | 8.48 | 180.69901 |
| 8.5 | 172.94547 | 8.5 | 241.1118 | 8.5 | 192.8828 | 8.5 | 172.10191 | 8.5 | 181.33926 |
| 8.52 | 176.0901 | 8.52 | 243.51561 | 8.52 | 193.33202 | 8.52 | 172.05982 | 8.52 | 181.49686 |
| 8.54 | 179.90991 | 8.54 | 242.74303 | 8.54 | 192.06132 | 8.54 | 171.81972 | 8.54 | 183.18962 |
| 8.56 | 181.63949 | 8.56 | 241.61521 | 8.56 | 189.60579 | 8.56 | 168.96555 | 8.56 | 184.72497 |
| 8.58 | 182.46244 | 8.58 | 239.56385 | 8.58 | 189.16183 | 8.58 | 165.08643 | 8.58 | 183.03224 |
| 8.6 | 183.77883 | 8.6 | 240.73244 | 8.6 | 185.60304 | 8.6 | 162.97899 | 8.6 | 183.65361 |
| 8.62 | 186.74474 | 8.62 | 238.14687 | 8.62 | 184.86557 | 8.62 | 161.47708 | 8.62 | 183.9292 |
| 8.64 | 185.98104 | 8.64 | 238.11158 | 8.64 | 185.98958 | 8.64 | 163.14284 | 8.64 | 183.71461 |
| 8.66 | 183.63727 | 8.66 | 236.88807 | 8.66 | 187.96168 | 8.66 | 164.0972 | 8.66 | 183.9715 |
| 8.68 | 182.05497 | 8.68 | 235.96751 | 8.68 | 185.21964 | 8.68 | 164.76727 | 8.68 | 181.74931 |
| 8.7 | 181.80732 | 8.7 | 235.74195 | 8.7 | 185.30532 | 8.7 | 162.02675 | 8.7 | 181.57661 |
| 8.72 | 179.44599 | 8.72 | 236.27026 | 8.72 | 185.14806 | 8.72 | 163.30801 | 8.72 | 180.86727 |
| 8.74 | 182.03381 | 8.74 | 235.61039 | 8.74 | 188.2631 | 8.74 | 164.89127 | 8.74 | 181.2176 |
| 8.76 | 180.19194 | 8.76 | 231.47384 | 8.76 | 187.71891 | 8.76 | 166.35694 | 8.76 | 179.8027 |
| 8.78 | 182.3964 | 8.78 | 228.75313 | 8.78 | 186.22172 | 8.78 | 168.42985 | 8.78 | 180.32591 |
| 8.8 | 183.85832 | 8.8 | 226.5434 | 8.8 | 189.68197 | 8.8 | 170.5254 | 8.8 | 177.28188 |
| 8.82 | 181.83788 | 8.82 | 226.01884 | 8.82 | 189.93074 | 8.82 | 171.34497 | 8.82 | 172.56811 |
| 8.84 | 182.03058 | 8.84 | 226.86316 | 8.84 | 189.92752 | 8.84 | 170.83478 | 8.84 | 172.18928 |
| 8.86 | 183.32845 | 8.86 | 225.473 | 8.86 | 187.4675 | 8.86 | 171.9509 | 8.86 | 171.91615 |
| 8.88 | 182.47206 | 8.88 | 223.76855 | 8.88 | 187.43617 | 8.88 | 171.65946 | 8.88 | 174.13855 |
| 8.9 | 183.39431 | 8.9 | 222.33816 | 8.9 | 186.70663 | 8.9 | 174.37222 | 8.9 | 173.30537 |
| 8.92 | 182.66194 | 8.92 | 218.47378 | 8.92 | 188.11628 | 8.92 | 175.8862 | 8.92 | 174.8407 |
| 8.94 | 183.44944 | 8.94 | 218.30598 | 8.94 | 190.32944 | 8.94 | 176.88925 | 8.94 | 174.68969 |
| 8.96 | 183.62782 | 8.96 | 217.83184 | 8.96 | 192.75778 | 8.96 | 177.44759 | 8.96 | 174.69629 |
| 8.98 | 185.36739 | 8.98 | 216.34295 | 8.98 | 192.89276 | 8.98 | 179.53504 | 8.98 | 177.02272 |
| 9 | 187.06827 | 9 | 216.24596 | 9 | 195.64706 | 9 | 179.95654 | 9 | 176.37247 |
| 9.02 | 186.49407 | 9.02 | 218.60444 | 9.02 | 196.99159 | 9.02 | 180.96676 | 9.02 | 178.00463 |
| 9.04 | 184.47949 | 9.04 | 219.89648 | 9.04 | 199.89371 | 9.04 | 181.8941 | 9.04 | 179.85708 |
| 9.06 | 181.60719 | 9.06 | 222.93959 | 9.06 | 200.20421 | 9.06 | 182.87919 | 9.06 | 179.33122 |
| 9.08 | 180.22813 | 9.08 | 222.86504 | 9.08 | 203.32659 | 9.08 | 186.89134 | 9.08 | 179.47395 |
| 9.1 | 179.03803 | 9.1 | 222.13323 | 9.1 | 205.54071 | 9.1 | 187.33228 | 9.1 | 181.42643 |
| 9.12 | 178.55842 | 9.12 | 225.48741 | 9.12 | 207.88825 | 9.12 | 189.46294 | 9.12 | 180.18857 |
| 9.14 | 178.2566 | 9.14 | 222.76652 | 9.14 | 209.39831 | 9.14 | 191.03188 | 9.14 | 181.26392 |
| 9.16 | 174.35166 | 9.16 | 220.27116 | 9.16 | 208.79657 | 9.16 | 192.36106 | 9.16 | 182.61973 |
| 9.18 | 172.09699 | 9.18 | 220.1728 | 9.18 | 209.34812 | 9.18 | 191.23456 | 9.18 | 183.84587 |
| 9.2 | 168.58824 | 9.2 | 221.012 | 9.2 | 207.24577 | 9.2 | 193.7937 | 9.2 | 183.87324 |
| 9.22 | 168.33211 | 9.22 | 222.52054 | 9.22 | 206.20782 | 9.22 | 191.51429 | 9.22 | 184.87344 |
| 9.24 | 170.31142 | 9.24 | 223.84371 | 9.24 | 205.51264 | 9.24 | 187.96457 | 9.24 | 183.40945 |
| 9.26 | 168.31439 | 9.26 | 225.20351 | 9.26 | 205.84996 | 9.26 | 189.49273 | 9.26 | 186.34042 |
| 9.28 | 168.41991 | 9.28 | 228.3257 | 9.28 | 207.34922 | 9.28 | 186.90491 | 9.28 | 187.64151 |
| 9.3 | 166.50499 | 9.3 | 230.85747 | 9.3 | 207.26558 | 9.3 | 187.38963 | 9.3 | 183.65046 |
| 9.32 | 164.61554 | 9.32 | 230.88426 | 9.32 | 210.47553 | 9.32 | 189.15807 | 9.32 | 180.88237 |
| 9.34 | 162.11509 | 9.34 | 230.70701 | 9.34 | 207.16759 | 9.34 | 187.7396 | 9.34 | 178.23792 |
| 9.36 | 162.41502 | 9.36 | 232.65418 | 9.36 | 205.19624 | 9.36 | 187.18713 | 9.36 | 177.54084 |
| 9.38 | 161.45121 | 9.38 | 235.8398 | 9.38 | 207.41015 | 9.38 | 187.87402 | 9.38 | 174.18289 |
| 9.4 | 161.78794 | 9.4 | 236.85115 | 9.4 | 206.5213 | 9.4 | 187.09596 | 9.4 | 175.27635 |
| 9.42 | 160.34529 | 9.42 | 235.17368 | 9.42 | 204.62564 | 9.42 | 187.05821 | 9.42 | 176.84208 |
| 9.44 | 157.31954 | 9.44 | 236.14954 | 9.44 | 202.92363 | 9.44 | 185.71485 | 9.44 | 177.28754 |
| 9.46 | 156.43466 | 9.46 | 234.95414 | 9.46 | 199.7801 | 9.46 | 187.24076 | 9.46 | 180.94522 |
| 9.48 | 155.99616 | 9.48 | 235.82731 | 9.48 | 194.41586 | 9.48 | 186.01933 | 9.48 | 180.88369 |
| 9.5 | 155.29378 | 9.5 | 235.07493 | 9.5 | 194.22445 | 9.5 | 186.32359 | 9.5 | 180.76759 |
| 9.52 | 156.41971 | 9.52 | 236.1597 | 9.52 | 191.30497 | 9.52 | 183.87298 | 9.52 | 182.41015 |
| 9.54 | 157.66644 | 9.54 | 235.87353 | 9.54 | 188.0284 | 9.54 | 181.97127 | 9.54 | 180.99996 |
| 9.56 | 158.26252 | 9.56 | 236.96377 | 9.56 | 190.38027 | 9.56 | 179.75057 | 9.56 | 180.34745 |
| 9.58 | 157.51826 | 9.58 | 237.36639 | 9.58 | 193.42924 | 9.58 | 178.55199 | 9.58 | 178.28794 |
| 9.6 | 158.38049 | 9.6 | 235.92901 | 9.6 | 193.04114 | 9.6 | 181.53925 | 9.6 | 176.49759 |
| 9.62 | 156.23359 | 9.62 | 235.62417 | 9.62 | 193.10266 | 9.62 | 180.96545 | 9.62 | 174.22348 |
| 9.64 | 153.25089 | 9.64 | 233.89521 | 9.64 | 191.79177 | 9.64 | 180.74857 | 9.64 | 176.35262 |
| 9.66 | 154.37871 | 9.66 | 232.32382 | 9.66 | 191.19303 | 9.66 | 182.17422 | 9.66 | 173.7763 |
| 9.68 | 155.04257 | 9.68 | 230.72676 | 9.68 | 188.20581 | 9.68 | 183.44434 | 9.68 | 172.20867 |
| 9.7 | 156.67433 | 9.7 | 232.18963 | 9.7 | 187.94134 | 9.7 | 182.11552 | 9.7 | 173.58995 |
| 9.72 | 156.99693 | 9.72 | 232.27439 | 9.72 | 186.2873 | 9.72 | 183.4936 | 9.72 | 175.47486 |
| 9.74 | 157.01129 | 9.74 | 229.35851 | 9.74 | 186.35489 | 9.74 | 180.17 | 9.74 | 174.41007 |
| 9.76 | 157.42392 | 9.76 | 229.61126 | 9.76 | 187.05989 | 9.76 | 181.9713 | 9.76 | 173.93461 |
| 9.78 | 159.68483 | 9.78 | 230.84044 | 9.78 | 186.55967 | 9.78 | 181.63701 | 9.78 | 172.1301 |
| 9.8 | 160.92474 | 9.8 | 233.31992 | 9.8 | 187.76787 | 9.8 | 178.68261 | 9.8 | 173.49348 |
| 9.82 | 161.1605 | 9.82 | 234.77445 | 9.82 | 187.19369 | 9.82 | 178.36341 | 9.82 | 173.46667 |
| 9.84 | 163.65147 | 9.84 | 235.80505 | 9.84 | 185.46036 | 9.84 | 175.54418 | 9.84 | 176.50279 |
| 9.86 | 165.25647 | 9.86 | 233.36295 | 9.86 | 186.23935 | 9.86 | 174.43902 | 9.86 | 177.77613 |
| 9.88 | 168.36527 | 9.88 | 233.69495 | 9.88 | 193.14343 | 9.88 | 174.99982 | 9.88 | 178.61117 |
| 9.9 | 169.32075 | 9.9 | 233.48033 | 9.9 | 196.70941 | 9.9 | 176.47569 | 9.9 | 176.75835 |
| 9.92 | 169.39023 | 9.92 | 234.36542 | 9.92 | 198.52299 | 9.92 | 177.31112 | 9.92 | 178.84411 |
| 9.94 | 171.59053 | 9.94 | 233.61645 | 9.94 | 201.92869 | 9.94 | 178.62732 | 9.94 | 180.50668 |
| 9.96 | 171.44857 | 9.96 | 236.37058 | 9.96 | 205.92936 | 9.96 | 175.80734 | 9.96 | 185.10948 |
| 9.98 | 170.66809 | 9.98 | 238.99277 | 9.98 | 208.51793 | 9.98 | 176.92762 | 9.98 | 183.31122 |
| 10 | 172.80046 | 10 | 240.36633 | 10 | 213.28152 | 10 | 177.42443 | 10 | 181.64018 |
| 10.02 | 171.65567 | 10.02 | 242.52095 | 10.02 | 211.77168 | 10.02 | 176.53934 | 10.02 | 179.74433 |
| 10.04 | 172.13566 | 10.04 | 242.63005 | 10.04 | 215.79196 | 10.04 | 176.18504 | 10.04 | 177.46231 |
| 10.06 | 173.85956 | 10.06 | 241.06565 | 10.06 | 217.77615 | 10.06 | 177.76718 | 10.06 | 176.86924 |
| 10.08 | 174.70954 | 10.08 | 237.69639 | 10.08 | 221.48142 | 10.08 | 178.52032 | 10.08 | 178.10578 |
| 10.1 | 176.55389 | 10.1 | 234.07588 | 10.1 | 220.71263 | 10.1 | 176.28227 | 10.1 | 176.20351 |
| 10.12 | 177.89953 | 10.12 | 234.564 | 10.12 | 221.55353 | 10.12 | 176.59711 | 10.12 | 175.01718 |
| 10.14 | 177.83799 | 10.14 | 229.85192 | 10.14 | 220.99406 | 10.14 | 175.48572 | 10.14 | 174.83692 |
| 10.16 | 177.29401 | 10.16 | 231.42367 | 10.16 | 218.98778 | 10.16 | 172.79804 | 10.16 | 174.67855 |
| 10.18 | 178.95541 | 10.18 | 231.49541 | 10.18 | 219.51177 | 10.18 | 172.45377 | 10.18 | 172.62376 |
| 10.2 | 178.39727 | 10.2 | 229.50689 | 10.2 | 218.00397 | 10.2 | 174.2328 | 10.2 | 173.77462 |
| 10.22 | 179.98697 | 10.22 | 228.14976 | 10.22 | 221.08841 | 10.22 | 171.12042 | 10.22 | 174.06322 |
| 10.24 | 181.01642 | 10.24 | 228.65014 | 10.24 | 224.74346 | 10.24 | 170.81785 | 10.24 | 172.51298 |
| 10.26 | 181.76462 | 10.26 | 228.62711 | 10.26 | 225.63776 | 10.26 | 171.07966 | 10.26 | 172.26323 |
| 10.28 | 180.97544 | 10.28 | 230.26719 | 10.28 | 225.41767 | 10.28 | 169.45995 | 10.28 | 167.26842 |
| 10.3 | 179.64036 | 10.3 | 230.24038 | 10.3 | 223.65735 | 10.3 | 169.88408 | 10.3 | 163.47897 |
| 10.32 | 180.79306 | 10.32 | 229.94158 | 10.32 | 224.76478 | 10.32 | 168.56355 | 10.32 | 165.73612 |
| 10.34 | 180.67452 | 10.34 | 230.24225 | 10.34 | 219.88621 | 10.34 | 169.11621 | 10.34 | 164.38577 |
| 10.36 | 179.8674 | 10.36 | 229.45911 | 10.36 | 219.92284 | 10.36 | 169.96446 | 10.36 | 166.26142 |
| 10.38 | 178.50477 | 10.38 | 227.33449 | 10.38 | 219.06399 | 10.38 | 170.10223 | 10.38 | 168.80092 |
| 10.4 | 177.31318 | 10.4 | 228.99175 | 10.4 | 217.92882 | 10.4 | 167.8126 | 10.4 | 171.89558 |
| 10.42 | 177.65747 | 10.42 | 231.55595 | 10.42 | 217.54207 | 10.42 | 169.57008 | 10.42 | 172.02337 |
| 10.44 | 177.10478 | 10.44 | 233.21265 | 10.44 | 215.95596 | 10.44 | 171.17921 | 10.44 | 171.93863 |
| 10.46 | 180.71471 | 10.46 | 234.01373 | 10.46 | 215.84722 | 10.46 | 173.87425 | 10.46 | 172.98433 |
| 10.48 | 181.50067 | 10.48 | 235.43355 | 10.48 | 213.59424 | 10.48 | 174.30326 | 10.48 | 172.23743 |
| 10.5 | 180.96519 | 10.5 | 235.38184 | 10.5 | 215.37949 | 10.5 | 174.68229 | 10.5 | 172.8405 |
| 10.52 | 181.70926 | 10.52 | 239.43779 | 10.52 | 214.80227 | 10.52 | 174.24532 | 10.52 | 172.9696 |
| 10.54 | 182.24173 | 10.54 | 238.35394 | 10.54 | 217.09601 | 10.54 | 174.20775 | 10.54 | 172.81537 |
| 10.56 | 181.78361 | 10.56 | 235.5617 | 10.56 | 218.28912 | 10.56 | 174.58072 | 10.56 | 173.9947 |
| 10.58 | 181.56675 | 10.58 | 234.62549 | 10.58 | 216.6479 | 10.58 | 175.16416 | 10.58 | 171.46668 |
| 10.6 | 181.48594 | 10.6 | 235.43959 | 10.6 | 213.80355 | 10.6 | 174.1747 | 10.6 | 171.55577 |
| 10.62 | 178.83318 | 10.62 | 236.62971 | 10.62 | 212.43075 | 10.62 | 173.25846 | 10.62 | 172.97254 |
| 10.64 | 179.40019 | 10.64 | 237.29868 | 10.64 | 212.91019 | 10.64 | 176.79911 | 10.64 | 177.36901 |
| 10.66 | 179.35413 | 10.66 | 236.29601 | 10.66 | 215.54142 | 10.66 | 179.6408 | 10.66 | 176.06548 |
| 10.68 | 177.66459 | 10.68 | 238.16166 | 10.68 | 215.59637 | 10.68 | 180.21102 | 10.68 | 180.13707 |
| 10.7 | 178.20878 | 10.7 | 236.93003 | 10.7 | 216.39573 | 10.7 | 180.61627 | 10.7 | 182.31964 |
| 10.72 | 178.73524 | 10.72 | 238.94064 | 10.72 | 218.85558 | 10.72 | 182.98363 | 10.72 | 183.66189 |
| 10.74 | 177.87151 | 10.74 | 239.47046 | 10.74 | 217.77817 | 10.74 | 182.73298 | 10.74 | 182.98896 |
| 10.76 | 179.44536 | 10.76 | 241.49446 | 10.76 | 217.16132 | 10.76 | 183.1386 | 10.76 | 182.12333 |
| 10.78 | 180.64509 | 10.78 | 243.47393 | 10.78 | 215.37872 | 10.78 | 184.93271 | 10.78 | 180.5508 |
| 10.8 | 178.48138 | 10.8 | 244.91131 | 10.8 | 215.98367 | 10.8 | 186.30211 | 10.8 | 183.29719 |
| 10.82 | 178.03386 | 10.82 | 243.99207 | 10.82 | 214.96196 | 10.82 | 188.83804 | 10.82 | 182.38363 |
| 10.84 | 179.44499 | 10.84 | 243.58172 | 10.84 | 216.90103 | 10.84 | 188.16929 | 10.84 | 183.28171 |
| 10.86 | 180.16943 | 10.86 | 241.16416 | 10.86 | 222.42438 | 10.86 | 190.45589 | 10.86 | 182.14731 |
| 10.88 | 180.95634 | 10.88 | 243.16005 | 10.88 | 224.33797 | 10.88 | 193.07106 | 10.88 | 183.36082 |
| 10.9 | 176.71862 | 10.9 | 242.46583 | 10.9 | 221.96289 | 10.9 | 191.6437 | 10.9 | 182.56918 |
| 10.92 | 177.53782 | 10.92 | 242.36655 | 10.92 | 223.02216 | 10.92 | 192.72207 | 10.92 | 183.6921 |
| 10.94 | 177.44079 | 10.94 | 243.89394 | 10.94 | 222.58802 | 10.94 | 192.39516 | 10.94 | 182.22132 |
| 10.96 | 174.5574 | 10.96 | 243.81844 | 10.96 | 223.87362 | 10.96 | 192.79192 | 10.96 | 182.81438 |
| 10.98 | 171.83801 | 10.98 | 241.83104 | 10.98 | 222.38527 | 10.98 | 195.49791 | 10.98 | 182.69773 |
| 11 | 175.38699 | 11 | 239.29607 | 11 | 223.34321 | 11 | 195.2559 | 11 | 185.77292 |
| 11.02 | 174.18989 | 11.02 | 240.21815 | 11.02 | 225.47444 | 11.02 | 196.01885 | 11.02 | 188.38531 |
| 11.04 | 174.18667 | 11.04 | 237.53424 | 11.04 | 226.17473 | 11.04 | 198.44701 | 11.04 | 189.02935 |
| 11.06 | 173.45335 | 11.06 | 236.70844 | 11.06 | 224.03465 | 11.06 | 200.03936 | 11.06 | 190.88329 |
| 11.08 | 173.72687 | 11.08 | 238.39723 | 11.08 | 223.96124 | 11.08 | 199.25471 | 11.08 | 187.65954 |
| 11.1 | 174.92772 | 11.1 | 239.36179 | 11.1 | 224.452 | 11.1 | 197.11215 | 11.1 | 183.65339 |
| 11.12 | 176.86716 | 11.12 | 240.66251 | 11.12 | 223.52786 | 11.12 | 199.95857 | 11.12 | 186.5285 |
| 11.14 | 178.45552 | 11.14 | 237.61186 | 11.14 | 223.41593 | 11.14 | 201.22321 | 11.14 | 187.89527 |
| 11.16 | 179.92422 | 11.16 | 237.34649 | 11.16 | 224.04372 | 11.16 | 200.34589 | 11.16 | 187.65933 |
| 11.18 | 179.33492 | 11.18 | 234.94363 | 11.18 | 224.32196 | 11.18 | 200.95803 | 11.18 | 186.84354 |
| 11.2 | 179.78078 | 11.2 | 234.89079 | 11.2 | 226.09134 | 11.2 | 199.79453 | 11.2 | 189.27511 |
| 11.22 | 179.07521 | 11.22 | 235.50838 | 11.22 | 228.54912 | 11.22 | 194.9758 | 11.22 | 188.12614 |
| 11.24 | 178.07103 | 11.24 | 237.8512 | 11.24 | 227.57741 | 11.24 | 193.49956 | 11.24 | 186.11403 |
| 11.26 | 178.72717 | 11.26 | 236.86725 | 11.26 | 225.42901 | 11.26 | 193.92633 | 11.26 | 186.26864 |
| 11.28 | 176.37606 | 11.28 | 238.5721 | 11.28 | 223.67246 | 11.28 | 195.22572 | 11.28 | 184.39998 |
| 11.3 | 176.99818 | 11.3 | 238.1744 | 11.3 | 223.41557 | 11.3 | 193.86445 | 11.3 | 185.11044 |
| 11.32 | 177.78739 | 11.32 | 236.15302 | 11.32 | 225.12039 | 11.32 | 193.68835 | 11.32 | 188.33136 |
| 11.34 | 179.75912 | 11.34 | 238.92676 | 11.34 | 225.54942 | 11.34 | 196.19748 | 11.34 | 189.31402 |
| 11.36 | 178.93991 | 11.36 | 242.42403 | 11.36 | 228.68369 | 11.36 | 194.08456 | 11.36 | 191.57172 |
| 11.38 | 181.02207 | 11.38 | 245.6168 | 11.38 | 231.29004 | 11.38 | 196.50837 | 11.38 | 191.64176 |
| 11.4 | 181.55869 | 11.4 | 248.75521 | 11.4 | 232.3031 | 11.4 | 194.38071 | 11.4 | 191.09985 |
| 11.42 | 182.29238 | 11.42 | 249.48966 | 11.42 | 229.26622 | 11.42 | 195.08837 | 11.42 | 189.19117 |
| 11.44 | 183.64271 | 11.44 | 249.87851 | 11.44 | 228.37624 | 11.44 | 192.73385 | 11.44 | 188.81613 |
| 11.46 | 184.06478 | 11.46 | 251.82306 | 11.46 | 228.09933 | 11.46 | 192.20233 | 11.46 | 191.64103 |
| 11.48 | 185.00855 | 11.48 | 254.0634 | 11.48 | 226.63724 | 11.48 | 193.52133 | 11.48 | 191.99417 |
| 11.5 | 184.45758 | 11.5 | 254.72556 | 11.5 | 227.46057 | 11.5 | 191.61133 | 11.5 | 191.31484 |
| 11.52 | 186.82228 | 11.52 | 257.16333 | 11.52 | 228.16086 | 11.52 | 191.70381 | 11.52 | 190.64778 |
| 11.54 | 187.29323 | 11.54 | 253.37767 | 11.54 | 230.27322 | 11.54 | 190.53748 | 11.54 | 191.97377 |
| 11.56 | 186.36248 | 11.56 | 255.79544 | 11.56 | 231.17474 | 11.56 | 190.1494 | 11.56 | 193.10252 |
| 11.58 | 186.33475 | 11.58 | 256.95591 | 11.58 | 230.51958 | 11.58 | 190.64336 | 11.58 | 191.8624 |
| 11.6 | 183.66538 | 11.6 | 261.89238 | 11.6 | 232.08871 | 11.6 | 189.69788 | 11.6 | 194.65031 |
| 11.62 | 185.0952 | 11.62 | 263.20141 | 11.62 | 235.29943 | 11.62 | 191.31836 | 11.62 | 195.52252 |
| 11.64 | 185.41325 | 11.64 | 264.01852 | 11.64 | 238.25042 | 11.64 | 191.97203 | 11.64 | 197.20207 |
| 11.66 | 185.82568 | 11.66 | 261.08035 | 11.66 | 235.91215 | 11.66 | 192.04166 | 11.66 | 196.49197 |
| 11.68 | 187.51995 | 11.68 | 263.74499 | 11.68 | 235.79644 | 11.68 | 192.47221 | 11.68 | 198.9082 |
| 11.7 | 187.08148 | 11.7 | 264.26858 | 11.7 | 234.87832 | 11.7 | 190.69812 | 11.7 | 199.87953 |
| 11.72 | 187.50525 | 11.72 | 268.81492 | 11.72 | 233.2171 | 11.72 | 189.92499 | 11.72 | 199.84235 |
| 11.74 | 186.78553 | 11.74 | 268.59538 | 11.74 | 230.13551 | 11.74 | 190.54807 | 11.74 | 196.7375 |
| 11.76 | 187.02939 | 11.76 | 265.78518 | 11.76 | 229.34614 | 11.76 | 190.3495 | 11.76 | 196.21221 |
| 11.78 | 188.06678 | 11.78 | 267.28767 | 11.78 | 231.75181 | 11.78 | 192.66307 | 11.78 | 198.27002 |
| 11.8 | 187.20795 | 11.8 | 266.29122 | 11.8 | 232.57629 | 11.8 | 189.75437 | 11.8 | 202.83714 |
| 11.82 | 186.85442 | 11.82 | 264.35138 | 11.82 | 233.74543 | 11.82 | 189.49787 | 11.82 | 205.12051 |
| 11.84 | 185.67808 | 11.84 | 264.90876 | 11.84 | 232.92133 | 11.84 | 189.37746 | 11.84 | 207.61376 |
| 11.86 | 185.45099 | 11.86 | 266.08752 | 11.86 | 235.535 | 11.86 | 190.91184 | 11.86 | 209.56227 |
| 11.88 | 183.12817 | 11.88 | 269.26767 | 11.88 | 233.37073 | 11.88 | 191.60004 | 11.88 | 212.22596 |
| 11.9 | 181.99848 | 11.9 | 269.93924 | 11.9 | 230.26686 | 11.9 | 191.3477 | 11.9 | 213.62027 |
| 11.92 | 181.19268 | 11.92 | 272.70108 | 11.92 | 231.31029 | 11.92 | 193.17032 | 11.92 | 213.79714 |
| 11.94 | 179.1107 | 11.94 | 271.90209 | 11.94 | 230.06149 | 11.94 | 190.57512 | 11.94 | 214.76734 |
| 11.96 | 179.78684 | 11.96 | 270.23898 | 11.96 | 232.33656 | 11.96 | 191.26464 | 11.96 | 216.40514 |
| 11.98 | 178.03253 | 11.98 | 275.81574 | 11.98 | 232.19743 | 11.98 | 191.05777 | 11.98 | 215.98385 |
| 12 | 182.05056 | 12 | 277.7667 | 12 | 231.48301 | 12 | 194.40137 | 12 | 212.70933 |
| 12.02 | 178.51991 | 12.02 | 277.32801 | 12.02 | 233.53213 | 12.02 | 194.83777 | 12.02 | 210.92823 |
| 12.04 | 179.47368 | 12.04 | 276.50863 | 12.04 | 232.04739 | 12.04 | 197.82235 | 12.04 | 207.81168 |
| 12.06 | 179.33078 | 12.06 | 276.32951 | 12.06 | 230.81765 | 12.06 | 197.44465 | 12.06 | 208.64616 |
| 12.08 | 181.2138 | 12.08 | 275.97278 | 12.08 | 233.44115 | 12.08 | 196.83835 | 12.08 | 206.89208 |
| 12.1 | 179.86552 | 12.1 | 272.90174 | 12.1 | 234.65842 | 12.1 | 196.21226 | 12.1 | 208.55425 |
| 12.12 | 181.05017 | 12.12 | 272.18276 | 12.12 | 233.47415 | 12.12 | 198.10981 | 12.12 | 212.20515 |
| 12.14 | 179.78194 | 12.14 | 272.06196 | 12.14 | 235.6788 | 12.14 | 197.64528 | 12.14 | 212.70595 |
| 12.16 | 177.8678 | 12.16 | 271.84395 | 12.16 | 233.16648 | 12.16 | 197.32667 | 12.16 | 212.15764 |
| 12.18 | 176.66693 | 12.18 | 271.94323 | 12.18 | 231.94903 | 12.18 | 197.92919 | 12.18 | 213.7734 |
| 12.2 | 175.07498 | 12.2 | 272.93137 | 12.2 | 231.66928 | 12.2 | 196.57091 | 12.2 | 213.5484 |
| 12.22 | 175.85361 | 12.22 | 272.21298 | 12.22 | 231.11736 | 12.22 | 198.23895 | 12.22 | 210.32088 |
| 12.24 | 176.176 | 12.24 | 272.07275 | 12.24 | 230.80723 | 12.24 | 199.17291 | 12.24 | 209.12965 |
| 12.26 | 179.75311 | 12.26 | 271.62653 | 12.26 | 233.00114 | 12.26 | 199.98551 | 12.26 | 210.45546 |
| 12.28 | 178.3365 | 12.28 | 271.02063 | 12.28 | 234.09571 | 12.28 | 200.16597 | 12.28 | 209.11492 |
| 12.3 | 179.92505 | 12.3 | 269.85923 | 12.3 | 238.0539 | 12.3 | 198.72257 | 12.3 | 212.30224 |
| 12.32 | 180.31389 | 12.32 | 269.46851 | 12.32 | 237.27132 | 12.32 | 200.77546 | 12.32 | 213.59296 |
| 12.34 | 180.08191 | 12.34 | 270.53309 | 12.34 | 235.94343 | 12.34 | 203.37403 | 12.34 | 210.38791 |
| 12.36 | 180.84356 | 12.36 | 269.25147 | 12.36 | 237.41044 | 12.36 | 202.12277 | 12.36 | 210.24335 |
| 12.38 | 183.60296 | 12.38 | 269.63917 | 12.38 | 236.29264 | 12.38 | 202.80399 | 12.38 | 211.09274 |
| 12.4 | 187.77936 | 12.4 | 270.81587 | 12.4 | 236.51349 | 12.4 | 203.91141 | 12.4 | 207.66627 |
| 12.42 | 189.64936 | 12.42 | 270.05729 | 12.42 | 235.16859 | 12.42 | 207.26332 | 12.42 | 205.593 |
| 12.44 | 192.77627 | 12.44 | 270.80986 | 12.44 | 236.34831 | 12.44 | 208.33901 | 12.44 | 208.87017 |
| 12.46 | 194.86617 | 12.46 | 271.14793 | 12.46 | 236.93572 | 12.46 | 210.72561 | 12.46 | 208.98116 |
| 12.48 | 196.04851 | 12.48 | 270.0505 | 12.48 | 235.85417 | 12.48 | 211.60388 | 12.48 | 206.76198 |
| 12.5 | 195.51113 | 12.5 | 267.29752 | 12.5 | 236.26868 | 12.5 | 208.85731 | 12.5 | 208.56838 |
| 12.52 | 196.14517 | 12.52 | 263.80481 | 12.52 | 237.21567 | 12.52 | 210.8211 | 12.52 | 209.06367 |
| 12.54 | 193.50921 | 12.54 | 261.89006 | 12.54 | 237.00068 | 12.54 | 210.2473 | 12.54 | 210.70641 |
| 12.56 | 195.13005 | 12.56 | 264.32444 | 12.56 | 233.59969 | 12.56 | 210.03079 | 12.56 | 212.21059 |
| 12.58 | 196.75656 | 12.58 | 264.98488 | 12.58 | 235.0259 | 12.58 | 208.58455 | 12.58 | 209.34757 |
| 12.6 | 197.85227 | 12.6 | 266.41696 | 12.6 | 235.91643 | 12.6 | 208.97359 | 12.6 | 210.98765 |
| 12.62 | 202.77913 | 12.62 | 266.1548 | 12.62 | 237.10729 | 12.62 | 209.21274 | 12.62 | 210.02726 |
| 12.64 | 201.82383 | 12.64 | 262.57959 | 12.64 | 235.18142 | 12.64 | 208.8324 | 12.64 | 209.2781 |
| 12.66 | 203.75497 | 12.66 | 262.99294 | 12.66 | 233.25931 | 12.66 | 208.48773 | 12.66 | 210.51765 |
| 12.68 | 202.77513 | 12.68 | 264.54809 | 12.68 | 235.54191 | 12.68 | 209.01662 | 12.68 | 212.51542 |
| 12.7 | 203.01296 | 12.7 | 263.37346 | 12.7 | 235.8892 | 12.7 | 206.02353 | 12.7 | 214.09285 |
| 12.72 | 201.6309 | 12.72 | 262.00141 | 12.72 | 238.36491 | 12.72 | 209.83826 | 12.72 | 217.00136 |
| 12.74 | 200.92099 | 12.74 | 261.16787 | 12.74 | 236.62064 | 12.74 | 209.17121 | 12.74 | 220.1681 |
| 12.76 | 201.62617 | 12.76 | 256.3833 | 12.76 | 237.24391 | 12.76 | 206.77477 | 12.76 | 222.21554 |
| 12.78 | 200.84397 | 12.78 | 257.76292 | 12.78 | 240.2585 | 12.78 | 207.99299 | 12.78 | 224.99004 |
| 12.8 | 197.33124 | 12.8 | 256.11981 | 12.8 | 240.46612 | 12.8 | 208.13456 | 12.8 | 226.8304 |
| 12.82 | 195.8361 | 12.82 | 257.93921 | 12.82 | 239.256 | 12.82 | 209.13836 | 12.82 | 229.63811 |
| 12.84 | 195.11164 | 12.84 | 257.39048 | 12.84 | 238.76826 | 12.84 | 210.69182 | 12.84 | 230.79914 |
| 12.86 | 194.97838 | 12.86 | 261.30149 | 12.86 | 242.1309 | 12.86 | 211.03931 | 12.86 | 229.57186 |
| 12.88 | 192.92585 | 12.88 | 262.24299 | 12.88 | 239.28978 | 12.88 | 210.67484 | 12.88 | 227.38987 |
| 12.9 | 194.42757 | 12.9 | 260.45188 | 12.9 | 241.89837 | 12.9 | 207.32861 | 12.9 | 225.88436 |
| 12.92 | 194.68107 | 12.92 | 262.86851 | 12.92 | 243.13432 | 12.92 | 205.81932 | 12.92 | 224.64821 |
| 12.94 | 194.02891 | 12.94 | 262.41681 | 12.94 | 242.95501 | 12.94 | 207.32311 | 12.94 | 223.86641 |
| 12.96 | 193.30013 | 12.96 | 267.09943 | 12.96 | 247.91379 | 12.96 | 209.90358 | 12.96 | 224.20107 |
| 12.98 | 191.1236 | 12.98 | 267.24364 | 12.98 | 252.84179 | 12.98 | 209.21954 | 12.98 | 222.97549 |
| 13 | 192.60135 | 13 | 264.6139 | 13 | 251.74212 | 13 | 205.77419 | 13 | 221.72704 |
| 13.02 | 192.24121 | 13.02 | 264.3504 | 13.02 | 255.49587 | 13.02 | 202.3898 | 13.02 | 221.79877 |
| 13.04 | 192.55546 | 13.04 | 263.62294 | 13.04 | 256.07047 | 13.04 | 205.21452 | 13.04 | 221.71441 |
| 13.06 | 191.06373 | 13.06 | 262.6739 | 13.06 | 257.88461 | 13.06 | 204.93762 | 13.06 | 222.77259 |
| 13.08 | 189.90252 | 13.08 | 264.60506 | 13.08 | 260.35034 | 13.08 | 204.81662 | 13.08 | 221.11607 |
| 13.1 | 187.32169 | 13.1 | 264.66187 | 13.1 | 261.41794 | 13.1 | 207.98526 | 13.1 | 220.96033 |
| 13.12 | 189.21115 | 13.12 | 269.24446 | 13.12 | 258.59135 | 13.12 | 210.94529 | 13.12 | 221.80389 |
| 13.14 | 185.19706 | 13.14 | 270.56275 | 13.14 | 261.29868 | 13.14 | 210.45793 | 13.14 | 221.0587 |
| 13.16 | 183.75915 | 13.16 | 271.54844 | 13.16 | 262.45444 | 13.16 | 209.16289 | 13.16 | 221.88411 |
| 13.18 | 186.19539 | 13.18 | 274.46357 | 13.18 | 264.22495 | 13.18 | 208.49698 | 13.18 | 221.5753 |
| 13.2 | 186.7692 | 13.2 | 277.77243 | 13.2 | 267.41114 | 13.2 | 209.95074 | 13.2 | 221.27894 |
| 13.22 | 189.48407 | 13.22 | 280.68474 | 13.22 | 271.28023 | 13.22 | 211.21197 | 13.22 | 218.59201 |
| 13.24 | 192.76387 | 13.24 | 281.80913 | 13.24 | 273.91769 | 13.24 | 209.33195 | 13.24 | 218.7145 |
| 13.26 | 192.86656 | 13.26 | 284.71011 | 13.26 | 274.25802 | 13.26 | 213.49703 | 13.26 | 220.3327 |
| 13.28 | 191.681 | 13.28 | 287.75569 | 13.28 | 274.05434 | 13.28 | 213.91435 | 13.28 | 222.5951 |
| 13.3 | 193.27693 | 13.3 | 292.19067 | 13.3 | 273.9462 | 13.3 | 213.87527 | 13.3 | 224.69331 |
| 13.32 | 193.30184 | 13.32 | 295.92291 | 13.32 | 274.84507 | 13.32 | 216.02897 | 13.32 | 226.75486 |
| 13.34 | 194.43249 | 13.34 | 297.39482 | 13.34 | 277.86439 | 13.34 | 219.01564 | 13.34 | 227.78073 |
| 13.36 | 197.08335 | 13.36 | 303.05842 | 13.36 | 278.98106 | 13.36 | 219.92733 | 13.36 | 229.68037 |
| 13.38 | 197.18093 | 13.38 | 305.66756 | 13.38 | 278.99918 | 13.38 | 220.40337 | 13.38 | 227.85869 |
| 13.4 | 197.422 | 13.4 | 306.4928 | 13.4 | 280.50791 | 13.4 | 223.12047 | 13.4 | 225.76899 |
| 13.42 | 196.42216 | 13.42 | 308.22143 | 13.42 | 278.7657 | 13.42 | 222.95607 | 13.42 | 229.41045 |
| 13.44 | 197.47768 | 13.44 | 312.85667 | 13.44 | 281.01981 | 13.44 | 222.1667 | 13.44 | 230.06318 |
| 13.46 | 197.96731 | 13.46 | 313.12678 | 13.46 | 282.51757 | 13.46 | 224.23187 | 13.46 | 229.62486 |
| 13.48 | 196.7993 | 13.48 | 310.77981 | 13.48 | 283.91547 | 13.48 | 225.00427 | 13.48 | 230.89046 |
| 13.5 | 196.55392 | 13.5 | 308.35528 | 13.5 | 285.30225 | 13.5 | 223.91798 | 13.5 | 232.84631 |
| 13.52 | 196.99031 | 13.52 | 309.25999 | 13.52 | 282.62853 | 13.52 | 225.18905 | 13.52 | 233.85691 |
| 13.54 | 196.8391 | 13.54 | 314.19479 | 13.54 | 285.20615 | 13.54 | 225.36177 | 13.54 | 233.22497 |
| 13.56 | 202.00324 | 13.56 | 314.28973 | 13.56 | 287.28716 | 13.56 | 225.79742 | 13.56 | 234.65007 |
| 13.58 | 202.95759 | 13.58 | 315.87109 | 13.58 | 289.3529 | 13.58 | 224.2338 | 13.58 | 233.52167 |
| 13.6 | 204.73169 | 13.6 | 316.25409 | 13.6 | 290.36915 | 13.6 | 224.54109 | 13.6 | 235.89279 |
| 13.62 | 209.38957 | 13.62 | 316.89416 | 13.62 | 291.78217 | 13.62 | 223.53182 | 13.62 | 235.59079 |
| 13.64 | 209.2076 | 13.64 | 316.15365 | 13.64 | 293.16988 | 13.64 | 221.62748 | 13.64 | 239.96877 |
| 13.66 | 209.61907 | 13.66 | 318.92891 | 13.66 | 299.18812 | 13.66 | 220.09346 | 13.66 | 243.68838 |
| 13.68 | 211.29919 | 13.68 | 318.13314 | 13.68 | 298.41839 | 13.68 | 220.42093 | 13.68 | 247.97649 |
| 13.7 | 212.50345 | 13.7 | 314.70023 | 13.7 | 299.818 | 13.7 | 216.09656 | 13.7 | 248.55466 |
| 13.72 | 211.35978 | 13.72 | 314.90823 | 13.72 | 298.3512 | 13.72 | 216.75987 | 13.72 | 248.39025 |
| 13.74 | 213.55292 | 13.74 | 317.76861 | 13.74 | 291.85501 | 13.74 | 215.90634 | 13.74 | 246.19901 |
| 13.76 | 212.50873 | 13.76 | 319.75882 | 13.76 | 297.00176 | 13.76 | 215.18226 | 13.76 | 245.11028 |
| 13.78 | 212.94363 | 13.78 | 322.98843 | 13.78 | 296.20481 | 13.78 | 215.41482 | 13.78 | 247.66565 |
| 13.8 | 213.00366 | 13.8 | 324.291 | 13.8 | 291.09029 | 13.8 | 213.78096 | 13.8 | 247.08731 |
| 13.82 | 215.12527 | 13.82 | 326.67987 | 13.82 | 292.93782 | 13.82 | 209.03381 | 13.82 | 247.57446 |
| 13.84 | 216.87746 | 13.84 | 324.21323 | 13.84 | 293.83157 | 13.84 | 208.0434 | 13.84 | 244.99986 |
| 13.86 | 216.97279 | 13.86 | 327.34468 | 13.86 | 293.53882 | 13.86 | 205.31685 | 13.86 | 242.10454 |
| 13.88 | 219.28087 | 13.88 | 321.9189 | 13.88 | 297.6939 | 13.88 | 206.29764 | 13.88 | 237.79904 |
| 13.9 | 223.95312 | 13.9 | 321.79281 | 13.9 | 301.74817 | 13.9 | 205.25648 | 13.9 | 237.26466 |
| 13.92 | 221.97328 | 13.92 | 320.9487 | 13.92 | 300.33382 | 13.92 | 208.81978 | 13.92 | 237.95362 |
| 13.94 | 221.2564 | 13.94 | 317.94525 | 13.94 | 302.65968 | 13.94 | 212.16885 | 13.94 | 236.20878 |
| 13.96 | 224.19022 | 13.96 | 318.66611 | 13.96 | 303.93302 | 13.96 | 207.67686 | 13.96 | 236.54757 |
| 13.98 | 226.89187 | 13.98 | 317.35956 | 13.98 | 298.6947 | 13.98 | 205.75854 | 13.98 | 232.75623 |
| 14 | 228.68238 | 14 | 313.73148 | 14 | 297.17147 | 14 | 206.939 | 14 | 229.8498 |
| 14.02 | 228.94589 | 14.02 | 313.37587 | 14.02 | 299.44068 | 14.02 | 211.61087 | 14.02 | 230.14786 |
| 14.04 | 226.07284 | 14.04 | 313.46912 | 14.04 | 296.31834 | 14.04 | 214.85404 | 14.04 | 227.13513 |
| 14.06 | 227.19236 | 14.06 | 316.29593 | 14.06 | 292.83752 | 14.06 | 217.65801 | 14.06 | 227.45808 |
| 14.08 | 226.05363 | 14.08 | 317.97771 | 14.08 | 291.47791 | 14.08 | 219.37699 | 14.08 | 226.37161 |
| 14.1 | 227.16652 | 14.1 | 319.95207 | 14.1 | 291.59721 | 14.1 | 218.49832 | 14.1 | 227.35711 |
| 14.12 | 228.19824 | 14.12 | 323.06823 | 14.12 | 291.45262 | 14.12 | 218.10003 | 14.12 | 227.81162 |
| 14.14 | 225.97622 | 14.14 | 321.66013 | 14.14 | 296.11807 | 14.14 | 217.31556 | 14.14 | 226.52527 |
| 14.16 | 230.16432 | 14.16 | 321.93211 | 14.16 | 296.46047 | 14.16 | 222.47311 | 14.16 | 227.38636 |
| 14.18 | 233.05812 | 14.18 | 324.19491 | 14.18 | 299.80294 | 14.18 | 223.47651 | 14.18 | 227.83257 |
| 14.2 | 231.82346 | 14.2 | 327.1812 | 14.2 | 302.45513 | 14.2 | 224.93954 | 14.2 | 230.81582 |
| 14.22 | 230.502 | 14.22 | 328.74147 | 14.22 | 302.8651 | 14.22 | 225.65927 | 14.22 | 231.59858 |
| 14.24 | 231.13753 | 14.24 | 327.05362 | 14.24 | 301.68368 | 14.24 | 227.44642 | 14.24 | 235.52921 |
| 14.26 | 228.05214 | 14.26 | 330.77872 | 14.26 | 302.59914 | 14.26 | 227.68162 | 14.26 | 239.29505 |
| 14.28 | 226.20329 | 14.28 | 331.25193 | 14.28 | 305.69833 | 14.28 | 226.8694 | 14.28 | 241.77886 |
| 14.3 | 226.30483 | 14.3 | 331.19813 | 14.3 | 307.76615 | 14.3 | 227.17558 | 14.3 | 241.43571 |
| 14.32 | 223.52842 | 14.32 | 331.2257 | 14.32 | 309.83491 | 14.32 | 229.55844 | 14.32 | 243.3357 |
| 14.34 | 224.21531 | 14.34 | 331.99299 | 14.34 | 310.60219 | 14.34 | 233.10949 | 14.34 | 244.00806 |
| 14.36 | 226.05833 | 14.36 | 331.34705 | 14.36 | 309.88473 | 14.36 | 233.68651 | 14.36 | 242.50163 |
| 14.38 | 225.27274 | 14.38 | 331.05052 | 14.38 | 312.39801 | 14.38 | 236.81306 | 14.38 | 245.99358 |
| 14.4 | 226.41847 | 14.4 | 330.58128 | 14.4 | 315.12269 | 14.4 | 238.37539 | 14.4 | 249.15806 |
| 14.42 | 226.54304 | 14.42 | 328.83681 | 14.42 | 315.67594 | 14.42 | 238.56038 | 14.42 | 252.14887 |
| 14.44 | 227.14271 | 14.44 | 328.28434 | 14.44 | 317.25262 | 14.44 | 239.52075 | 14.44 | 250.12147 |
| 14.46 | 225.89578 | 14.46 | 323.13135 | 14.46 | 319.32874 | 14.46 | 240.97321 | 14.46 | 253.3018 |
| 14.48 | 226.68872 | 14.48 | 321.22266 | 14.48 | 321.41164 | 14.48 | 240.79561 | 14.48 | 255.32979 |
| 14.5 | 230.87528 | 14.5 | 322.38047 | 14.5 | 323.39566 | 14.5 | 238.84143 | 14.5 | 258.0275 |
| 14.52 | 233.60164 | 14.52 | 326.4772 | 14.52 | 326.38306 | 14.52 | 239.62045 | 14.52 | 261.25428 |
| 14.54 | 234.84591 | 14.54 | 327.43229 | 14.54 | 327.75135 | 14.54 | 239.99118 | 14.54 | 260.71652 |
| 14.56 | 235.60528 | 14.56 | 326.96397 | 14.56 | 326.22415 | 14.56 | 238.80429 | 14.56 | 264.92575 |
| 14.58 | 237.02453 | 14.58 | 327.0091 | 14.58 | 328.99073 | 14.58 | 241.35322 | 14.58 | 265.43916 |
| 14.6 | 238.80353 | 14.6 | 329.88159 | 14.6 | 331.04703 | 14.6 | 241.77923 | 14.6 | 264.29325 |
| 14.62 | 242.45724 | 14.62 | 332.22137 | 14.62 | 332.40041 | 14.62 | 243.94498 | 14.62 | 266.65816 |
| 14.64 | 240.6671 | 14.64 | 333.94338 | 14.64 | 336.80557 | 14.64 | 242.56142 | 14.64 | 266.21118 |
| 14.66 | 240.98178 | 14.66 | 335.08252 | 14.66 | 336.29855 | 14.66 | 238.79556 | 14.66 | 262.63769 |
| 14.68 | 240.78926 | 14.68 | 335.25352 | 14.68 | 332.48061 | 14.68 | 239.8539 | 14.68 | 262.00443 |
| 14.7 | 241.22866 | 14.7 | 341.30045 | 14.7 | 333.87738 | 14.7 | 242.23941 | 14.7 | 259.94135 |
| 14.72 | 240.66619 | 14.72 | 349.08547 | 14.72 | 334.24543 | 14.72 | 246.31463 | 14.72 | 260.40491 |
| 14.74 | 240.45215 | 14.74 | 353.91607 | 14.74 | 337.29135 | 14.74 | 247.85279 | 14.74 | 260.91643 |
| 14.76 | 244.70951 | 14.76 | 352.61233 | 14.76 | 342.59366 | 14.76 | 250.24976 | 14.76 | 261.95854 |
| 14.78 | 248.06294 | 14.78 | 350.53641 | 14.78 | 337.52335 | 14.78 | 251.09142 | 14.78 | 263.45687 |
| 14.8 | 248.28532 | 14.8 | 349.51561 | 14.8 | 337.8148 | 14.8 | 254.84329 | 14.8 | 260.21671 |
| 14.82 | 248.41216 | 14.82 | 348.75249 | 14.82 | 344.10241 | 14.82 | 255.12151 | 14.82 | 258.88428 |
| 14.84 | 250.81124 | 14.84 | 347.88555 | 14.84 | 341.08555 | 14.84 | 259.74789 | 14.84 | 259.73275 |
| 14.86 | 249.43316 | 14.86 | 347.84497 | 14.86 | 346.34085 | 14.86 | 264.48639 | 14.86 | 260.05156 |
| 14.88 | 253.88607 | 14.88 | 348.95956 | 14.88 | 347.15421 | 14.88 | 267.4151 | 14.88 | 259.48171 |
| 14.9 | 255.97107 | 14.9 | 353.80603 | 14.9 | 343.55295 | 14.9 | 266.29747 | 14.9 | 263.36022 |
| 14.92 | 255.39178 | 14.92 | 353.61445 | 14.92 | 341.71635 | 14.92 | 267.18215 | 14.92 | 263.87705 |
| 14.94 | 260.18767 | 14.94 | 356.20983 | 14.94 | 343.49744 | 14.94 | 266.51319 | 14.94 | 261.79187 |
| 14.96 | 264.10243 | 14.96 | 357.94429 | 14.96 | 343.30188 | 14.96 | 264.81517 | 14.96 | 263.42156 |
| 14.98 | 264.27061 | 14.98 | 359.80145 | 14.98 | 346.25173 | 14.98 | 266.42769 | 14.98 | 260.76523 |
| 15 | 263.23191 | 15 | 360.52645 | 15 | 349.56326 | 15 | 270.87361 | 15 | 261.58463 |
| 15.02 | 261.67581 | 15.02 | 364.39459 | 15.02 | 349.33676 | 15.02 | 272.05371 | 15.02 | 262.98652 |
| 15.04 | 262.79852 | 15.04 | 365.8916 | 15.04 | 348.83486 | 15.04 | 271.23529 | 15.04 | 263.78854 |
| 15.06 | 264.10642 | 15.06 | 366.83517 | 15.06 | 352.15901 | 15.06 | 273.58851 | 15.06 | 267.202 |
| 15.08 | 263.89934 | 15.08 | 367.23401 | 15.08 | 356.08718 | 15.08 | 271.12882 | 15.08 | 268.40984 |
| 15.1 | 266.62233 | 15.1 | 371.27224 | 15.1 | 357.43752 | 15.1 | 268.39925 | 15.1 | 270.57523 |
| 15.12 | 265.5419 | 15.12 | 372.51217 | 15.12 | 361.46723 | 15.12 | 271.97786 | 15.12 | 271.59847 |
| 15.14 | 264.57774 | 15.14 | 372.51501 | 15.14 | 363.45557 | 15.14 | 272.2325 | 15.14 | 272.17662 |
| 15.16 | 264.89146 | 15.16 | 373.7891 | 15.16 | 366.10305 | 15.16 | 271.51601 | 15.16 | 275.82787 |
| 15.18 | 264.95298 | 15.18 | 378.02327 | 15.18 | 364.35554 | 15.18 | 267.42474 | 15.18 | 278.266 |
| 15.2 | 263.84819 | 15.2 | 375.97734 | 15.2 | 362.64655 | 15.2 | 269.30929 | 15.2 | 284.50376 |
| 15.22 | 263.5009 | 15.22 | 372.11109 | 15.22 | 364.92633 | 15.22 | 270.64493 | 15.22 | 284.50152 |
| 15.24 | 266.48776 | 15.24 | 371.32189 | 15.24 | 365.69117 | 15.24 | 269.18569 | 15.24 | 286.78508 |
| 15.26 | 264.2865 | 15.26 | 374.46749 | 15.26 | 367.71386 | 15.26 | 269.7259 | 15.26 | 288.97709 |
| 15.28 | 263.49354 | 15.28 | 373.75211 | 15.28 | 365.18738 | 15.28 | 271.36261 | 15.28 | 290.76478 |
| 15.3 | 263.62416 | 15.3 | 376.2399 | 15.3 | 364.05636 | 15.3 | 271.94606 | 15.3 | 294.98743 |
| 15.32 | 261.54635 | 15.32 | 378.48626 | 15.32 | 363.31512 | 15.32 | 275.64735 | 15.32 | 298.86822 |
| 15.34 | 262.7929 | 15.34 | 375.90919 | 15.34 | 367.94055 | 15.34 | 277.15739 | 15.34 | 301.12347 |
| 15.36 | 261.42743 | 15.36 | 375.85597 | 15.36 | 367.14551 | 15.36 | 274.69092 | 15.36 | 301.69179 |
| 15.38 | 261.05273 | 15.38 | 378.18766 | 15.38 | 372.04183 | 15.38 | 276.94899 | 15.38 | 308.98981 |
| 15.4 | 262.41214 | 15.4 | 377.49701 | 15.4 | 377.33282 | 15.4 | 276.38348 | 15.4 | 307.24912 |
| 15.42 | 262.96198 | 15.42 | 378.93931 | 15.42 | 376.61387 | 15.42 | 275.39385 | 15.42 | 306.81005 |
| 15.44 | 263.72134 | 15.44 | 379.90083 | 15.44 | 385.06612 | 15.44 | 277.24497 | 15.44 | 303.50251 |
| 15.46 | 262.7568 | 15.46 | 380.5054 | 15.46 | 392.00642 | 15.46 | 276.37388 | 15.46 | 308.65836 |
| 15.48 | 268.03908 | 15.48 | 380.98993 | 15.48 | 395.57029 | 15.48 | 277.181 | 15.48 | 311.12425 |
| 15.5 | 272.40914 | 15.5 | 384.22367 | 15.5 | 395.17108 | 15.5 | 278.20253 | 15.5 | 310.61876 |
| 15.52 | 271.38458 | 15.52 | 385.05834 | 15.52 | 395.38285 | 15.52 | 284.69192 | 15.52 | 311.5848 |
| 15.54 | 271.75245 | 15.54 | 384.69441 | 15.54 | 396.88704 | 15.54 | 283.65055 | 15.54 | 312.31225 |
| 15.56 | 272.80608 | 15.56 | 383.92713 | 15.56 | 404.17845 | 15.56 | 288.92095 | 15.56 | 313.76453 |
| 15.58 | 274.92484 | 15.58 | 381.52071 | 15.58 | 407.75858 | 15.58 | 292.35421 | 15.58 | 314.42459 |
| 15.6 | 273.30287 | 15.6 | 387.1552 | 15.6 | 407.24591 | 15.6 | 289.29771 | 15.6 | 313.29318 |
| 15.62 | 277.75861 | 15.62 | 386.21463 | 15.62 | 414.36403 | 15.62 | 291.90443 | 15.62 | 314.5212 |
| 15.64 | 280.56655 | 15.64 | 388.12163 | 15.64 | 417.36238 | 15.64 | 293.27573 | 15.64 | 310.32407 |
| 15.66 | 283.42674 | 15.66 | 390.84647 | 15.66 | 417.25441 | 15.66 | 296.56722 | 15.66 | 313.05102 |
| 15.68 | 283.3148 | 15.68 | 397.0935 | 15.68 | 420.17369 | 15.68 | 302.89297 | 15.68 | 314.18524 |
| 15.7 | 284.23779 | 15.7 | 400.21626 | 15.7 | 421.2011 | 15.7 | 307.07709 | 15.7 | 315.19166 |
| 15.72 | 286.16763 | 15.72 | 399.13245 | 15.72 | 425.98753 | 15.72 | 309.20226 | 15.72 | 313.81678 |
| 15.74 | 284.7699 | 15.74 | 395.14179 | 15.74 | 426.70405 | 15.74 | 311.21607 | 15.74 | 315.56333 |
| 15.76 | 286.22878 | 15.76 | 392.29311 | 15.76 | 427.50286 | 15.76 | 316.4942 | 15.76 | 318.52736 |
| 15.78 | 284.89016 | 15.78 | 390.04202 | 15.78 | 428.10933 | 15.78 | 316.8802 | 15.78 | 320.24465 |
| 15.8 | 285.37262 | 15.8 | 390.63546 | 15.8 | 431.84761 | 15.8 | 317.92173 | 15.8 | 321.4455 |
| 15.82 | 286.54931 | 15.82 | 393.86016 | 15.82 | 439.59616 | 15.82 | 318.19752 | 15.82 | 323.43591 |
| 15.84 | 290.25154 | 15.84 | 396.46214 | 15.84 | 442.65475 | 15.84 | 318.44328 | 15.84 | 326.41766 |
| 15.86 | 291.788 | 15.86 | 398.0656 | 15.86 | 446.14408 | 15.86 | 318.54614 | 15.86 | 326.38159 |
| 15.88 | 294.07231 | 15.88 | 400.3686 | 15.88 | 447.92517 | 15.88 | 319.25076 | 15.88 | 329.03945 |
| 15.9 | 295.37112 | 15.9 | 403.63499 | 15.9 | 445.68369 | 15.9 | 321.72193 | 15.9 | 331.60501 |
| 15.92 | 296.44042 | 15.92 | 403.92945 | 15.92 | 449.4922 | 15.92 | 322.99075 | 15.92 | 333.01086 |
| 15.94 | 296.83606 | 15.94 | 407.68756 | 15.94 | 452.10022 | 15.94 | 324.53701 | 15.94 | 335.65608 |
| 15.96 | 297.73772 | 15.96 | 408.23136 | 15.96 | 455.96386 | 15.96 | 326.20128 | 15.96 | 336.28671 |
| 15.98 | 297.38532 | 15.98 | 409.06451 | 15.98 | 457.93616 | 15.98 | 326.1739 | 15.98 | 337.29807 |
| 16 | 299.0656 | 16 | 410.13814 | 16 | 455.61223 | 16 | 332.01115 | 16 | 338.05916 |
| 16.02 | 304.1916 | 16.02 | 412.14496 | 16.02 | 457.09395 | 16.02 | 330.42693 | 16.02 | 340.39745 |
| 16.04 | 304.15972 | 16.04 | 415.91893 | 16.04 | 457.65437 | 16.04 | 328.29513 | 16.04 | 343.52831 |
| 16.06 | 304.3751 | 16.06 | 416.83534 | 16.06 | 455.6802 | 16.06 | 331.50357 | 16.06 | 340.45935 |
| 16.08 | 305.38096 | 16.08 | 418.34918 | 16.08 | 451.81883 | 16.08 | 330.68965 | 16.08 | 341.57526 |
| 16.1 | 307.82252 | 16.1 | 422.27603 | 16.1 | 449.39577 | 16.1 | 331.63945 | 16.1 | 342.85748 |
| 16.12 | 308.35272 | 16.12 | 424.93937 | 16.12 | 448.18642 | 16.12 | 332.27197 | 16.12 | 342.83519 |
| 16.14 | 309.65193 | 16.14 | 428.30866 | 16.14 | 446.94331 | 16.14 | 334.03721 | 16.14 | 343.07509 |
| 16.16 | 311.40736 | 16.16 | 433.00149 | 16.16 | 448.6757 | 16.16 | 334.16027 | 16.16 | 348.4529 |
| 16.18 | 313.78339 | 16.18 | 435.41246 | 16.18 | 444.67616 | 16.18 | 334.14911 | 16.18 | 353.48152 |
| 16.2 | 313.15787 | 16.2 | 437.07275 | 16.2 | 447.37405 | 16.2 | 335.22105 | 16.2 | 357.33252 |
| 16.22 | 313.58541 | 16.22 | 439.81726 | 16.22 | 443.58367 | 16.22 | 336.37133 | 16.22 | 354.29718 |
| 16.24 | 313.7634 | 16.24 | 443.92382 | 16.24 | 440.05831 | 16.24 | 335.21521 | 16.24 | 357.42013 |
| 16.26 | 313.45797 | 16.26 | 449.48246 | 16.26 | 440.70384 | 16.26 | 337.1654 | 16.26 | 357.7663 |
| 16.28 | 315.15318 | 16.28 | 455.56736 | 16.28 | 439.08433 | 16.28 | 335.87676 | 16.28 | 360.58346 |
| 16.3 | 314.52766 | 16.3 | 461.39195 | 16.3 | 441.52835 | 16.3 | 335.13758 | 16.3 | 361.58727 |
| 16.32 | 316.7459 | 16.32 | 461.95408 | 16.32 | 447.26988 | 16.32 | 337.417 | 16.32 | 360.59064 |
| 16.34 | 318.1838 | 16.34 | 462.2293 | 16.34 | 450.44853 | 16.34 | 336.60064 | 16.34 | 360.10327 |
| 16.36 | 322.22466 | 16.36 | 471.38126 | 16.36 | 451.87591 | 16.36 | 334.9749 | 16.36 | 359.67725 |
| 16.38 | 325.08183 | 16.38 | 473.15329 | 16.38 | 456.84412 | 16.38 | 338.36134 | 16.38 | 361.57649 |
| 16.4 | 327.14549 | 16.4 | 475.14467 | 16.4 | 455.02924 | 16.4 | 336.32261 | 16.4 | 356.91914 |
| 16.42 | 327.24438 | 16.42 | 476.17847 | 16.42 | 456.51586 | 16.42 | 336.76072 | 16.42 | 359.92091 |
| 16.44 | 330.98322 | 16.44 | 475.07218 | 16.44 | 463.31404 | 16.44 | 338.27736 | 16.44 | 357.16472 |
| 16.46 | 335.16508 | 16.46 | 474.75734 | 16.46 | 460.78887 | 16.46 | 338.82663 | 16.46 | 359.34653 |
| 16.48 | 339.71235 | 16.48 | 474.78547 | 16.48 | 462.92784 | 16.48 | 343.87092 | 16.48 | 359.05507 |
| 16.5 | 341.60764 | 16.5 | 475.31888 | 16.5 | 465.04622 | 16.5 | 344.67539 | 16.5 | 361.11929 |
| 16.52 | 341.16292 | 16.52 | 471.30332 | 16.52 | 470.59392 | 16.52 | 344.77524 | 16.52 | 365.12638 |
| 16.54 | 344.91894 | 16.54 | 472.49757 | 16.54 | 475.91549 | 16.54 | 340.02996 | 16.54 | 367.77421 |
| 16.56 | 346.85255 | 16.56 | 472.43189 | 16.56 | 478.42235 | 16.56 | 344.68143 | 16.56 | 366.049 |
| 16.58 | 349.02646 | 16.58 | 474.66127 | 16.58 | 482.42186 | 16.58 | 342.34164 | 16.58 | 368.39464 |
| 16.6 | 351.54066 | 16.6 | 480.61551 | 16.6 | 490.3537 | 16.6 | 342.58135 | 16.6 | 369.23876 |
| 16.62 | 357.64595 | 16.62 | 482.14197 | 16.62 | 493.65163 | 16.62 | 345.06215 | 16.62 | 371.43173 |
| 16.64 | 353.37973 | 16.64 | 486.15338 | 16.64 | 496.38291 | 16.64 | 345.40906 | 16.64 | 371.04234 |
| 16.66 | 350.98385 | 16.66 | 487.5494 | 16.66 | 497.16869 | 16.66 | 346.32073 | 16.66 | 374.27853 |
| 16.68 | 345.1653 | 16.68 | 485.78209 | 16.68 | 500.13402 | 16.68 | 348.48313 | 16.68 | 372.6879 |
| 16.7 | 346.20874 | 16.7 | 484.12822 | 16.7 | 502.24997 | 16.7 | 348.02821 | 16.7 | 377.12287 |
| 16.72 | 342.8393 | 16.72 | 488.16378 | 16.72 | 508.74727 | 16.72 | 348.13033 | 16.72 | 380.27225 |
| 16.74 | 339.50363 | 16.74 | 486.06802 | 16.74 | 511.77642 | 16.74 | 347.19995 | 16.74 | 388.68806 |
| 16.76 | 340.99424 | 16.76 | 488.48689 | 16.76 | 517.62478 | 16.76 | 350.52733 | 16.76 | 393.46676 |
| 16.78 | 342.85671 | 16.78 | 489.30269 | 16.78 | 522.56638 | 16.78 | 350.03354 | 16.78 | 398.02858 |
| 16.8 | 341.53524 | 16.8 | 490.32271 | 16.8 | 528.26185 | 16.8 | 349.73079 | 16.8 | 398.32607 |
| 16.82 | 342.34444 | 16.82 | 495.24224 | 16.82 | 534.84427 | 16.82 | 350.27593 | 16.82 | 396.37718 |
| 16.84 | 341.64153 | 16.84 | 499.38011 | 16.84 | 536.90773 | 16.84 | 350.25705 | 16.84 | 400.71269 |
| 16.86 | 342.83542 | 16.86 | 497.05558 | 16.86 | 538.38435 | 16.86 | 350.06981 | 16.86 | 405.61957 |
| 16.88 | 342.11514 | 16.88 | 503.37037 | 16.88 | 542.45389 | 16.88 | 352.23748 | 16.88 | 410.94587 |
| 16.9 | 342.80694 | 16.9 | 506.10938 | 16.9 | 536.64968 | 16.9 | 352.42701 | 16.9 | 412.87683 |
| 16.92 | 340.74139 | 16.92 | 505.57388 | 16.92 | 544.37032 | 16.92 | 355.1734 | 16.92 | 415.62039 |
| 16.94 | 341.33635 | 16.94 | 506.89459 | 16.94 | 545.28164 | 16.94 | 358.10306 | 16.94 | 418.49172 |
| 16.96 | 344.31604 | 16.96 | 505.3668 | 16.96 | 547.98839 | 16.96 | 361.98935 | 16.96 | 416.17776 |
| 16.98 | 340.64967 | 16.98 | 510.34292 | 16.98 | 544.93659 | 16.98 | 363.65587 | 16.98 | 418.75428 |
| 17 | 342.17953 | 17 | 515.2764 | 17 | 545.356 | 17 | 368.76489 | 17 | 418.28087 |
| 17.02 | 343.09823 | 17.02 | 516.03106 | 17.02 | 550.18738 | 17.02 | 366.42753 | 17.02 | 418.98775 |
| 17.04 | 341.57743 | 17.04 | 517.12924 | 17.04 | 551.40541 | 17.04 | 370.05107 | 17.04 | 420.69276 |
| 17.06 | 344.61863 | 17.06 | 519.28237 | 17.06 | 547.59804 | 17.06 | 373.17384 | 17.06 | 422.69 |
| 17.08 | 348.75162 | 17.08 | 528.76673 | 17.08 | 551.04752 | 17.08 | 373.46848 | 17.08 | 431.49447 |
| 17.1 | 350.66881 | 17.1 | 533.01275 | 17.1 | 552.21025 | 17.1 | 373.97738 | 17.1 | 433.42299 |
| 17.12 | 349.62102 | 17.12 | 536.48792 | 17.12 | 552.6678 | 17.12 | 374.04686 | 17.12 | 436.62387 |
| 17.14 | 348.03852 | 17.14 | 536.57039 | 17.14 | 555.56576 | 17.14 | 376.41403 | 17.14 | 441.62419 |
| 17.16 | 349.42624 | 17.16 | 534.53788 | 17.16 | 556.95555 | 17.16 | 373.40114 | 17.16 | 446.35043 |
| 17.18 | 349.5142 | 17.18 | 535.10451 | 17.18 | 558.29212 | 17.18 | 376.38197 | 17.18 | 444.6256 |
| 17.2 | 350.81397 | 17.2 | 537.24274 | 17.2 | 559.96357 | 17.2 | 382.40892 | 17.2 | 442.18689 |
| 17.22 | 354.91051 | 17.22 | 538.95211 | 17.22 | 555.60994 | 17.22 | 382.8357 | 17.22 | 442.42227 |
| 17.24 | 356.90735 | 17.24 | 544.62551 | 17.24 | 561.86659 | 17.24 | 387.09231 | 17.24 | 442.79712 |
| 17.26 | 361.3663 | 17.26 | 550.40611 | 17.26 | 561.59063 | 17.26 | 390.27036 | 17.26 | 444.95516 |
| 17.28 | 359.48365 | 17.28 | 553.23574 | 17.28 | 557.26778 | 17.28 | 393.61832 | 17.28 | 445.68053 |
| 17.3 | 363.46805 | 17.3 | 556.68901 | 17.3 | 562.48216 | 17.3 | 401.42541 | 17.3 | 443.70557 |
| 17.32 | 367.49021 | 17.32 | 556.83038 | 17.32 | 570.51972 | 17.32 | 405.23054 | 17.32 | 444.88246 |
| 17.34 | 372.21415 | 17.34 | 562.31314 | 17.34 | 574.68913 | 17.34 | 405.96761 | 17.34 | 446.32661 |
| 17.36 | 370.52179 | 17.36 | 567.49672 | 17.36 | 575.23841 | 17.36 | 411.9951 | 17.36 | 445.91758 |
| 17.38 | 375.0619 | 17.38 | 563.5474 | 17.38 | 571.56807 | 17.38 | 415.99483 | 17.38 | 449.78893 |
| 17.4 | 379.39626 | 17.4 | 562.00018 | 17.4 | 573.20366 | 17.4 | 421.93269 | 17.4 | 452.97303 |
| 17.42 | 382.33365 | 17.42 | 563.14102 | 17.42 | 581.85372 | 17.42 | 426.24536 | 17.42 | 456.09502 |
| 17.44 | 385.64271 | 17.44 | 561.62306 | 17.44 | 587.8637 | 17.44 | 425.8601 | 17.44 | 455.8453 |
| 17.46 | 388.9882 | 17.46 | 560.92542 | 17.46 | 588.0015 | 17.46 | 432.04576 | 17.46 | 461.90584 |
| 17.48 | 390.26606 | 17.48 | 563.77769 | 17.48 | 594.62755 | 17.48 | 433.0424 | 17.48 | 462.80791 |
| 17.5 | 390.85593 | 17.5 | 564.62557 | 17.5 | 599.91609 | 17.5 | 433.49238 | 17.5 | 469.10648 |
| 17.52 | 395.73847 | 17.52 | 566.17488 | 17.52 | 599.43441 | 17.52 | 435.45014 | 17.52 | 467.80369 |
| 17.54 | 396.53315 | 17.54 | 573.37172 | 17.54 | 605.38527 | 17.54 | 438.63971 | 17.54 | 470.43662 |
| 17.56 | 398.5094 | 17.56 | 575.85988 | 17.56 | 612.64159 | 17.56 | 441.98613 | 17.56 | 470.09536 |
| 17.58 | 398.70646 | 17.58 | 579.50096 | 17.58 | 617.57166 | 17.58 | 446.12532 | 17.58 | 474.72477 |
| 17.6 | 397.28647 | 17.6 | 582.82908 | 17.6 | 620.09721 | 17.6 | 445.56487 | 17.6 | 475.75933 |
| 17.62 | 397.80556 | 17.62 | 586.94019 | 17.62 | 616.20491 | 17.62 | 444.87949 | 17.62 | 479.88927 |
| 17.64 | 396.35743 | 17.64 | 591.45954 | 17.64 | 621.18671 | 17.64 | 446.51937 | 17.64 | 474.36707 |
| 17.66 | 402.10558 | 17.66 | 595.56345 | 17.66 | 620.69198 | 17.66 | 443.68767 | 17.66 | 481.88612 |
| 17.68 | 406.14062 | 17.68 | 602.02606 | 17.68 | 629.65727 | 17.68 | 445.89553 | 17.68 | 487.4153 |
| 17.7 | 411.41859 | 17.7 | 609.79105 | 17.7 | 635.64908 | 17.7 | 439.95784 | 17.7 | 492.56074 |
| 17.72 | 412.42465 | 17.72 | 611.90662 | 17.72 | 645.16005 | 17.72 | 442.50601 | 17.72 | 495.04513 |
| 17.74 | 419.10714 | 17.74 | 615.40634 | 17.74 | 645.31463 | 17.74 | 443.79577 | 17.74 | 498.43422 |
| 17.76 | 422.23709 | 17.76 | 616.03679 | 17.76 | 649.16652 | 17.76 | 449.89386 | 17.76 | 499.01447 |
| 17.78 | 427.358 | 17.78 | 618.76638 | 17.78 | 654.72403 | 17.78 | 450.39406 | 17.78 | 498.5607 |
| 17.8 | 430.94908 | 17.8 | 628.1926 | 17.8 | 655.47094 | 17.8 | 453.1038 | 17.8 | 498.54257 |
| 17.82 | 435.18172 | 17.82 | 638.2923 | 17.82 | 659.15126 | 17.82 | 457.40836 | 17.82 | 503.31033 |
| 17.84 | 437.25519 | 17.84 | 642.21896 | 17.84 | 662.46333 | 17.84 | 462.11079 | 17.84 | 506.70414 |
| 17.86 | 439.3315 | 17.86 | 643.34773 | 17.86 | 666.75429 | 17.86 | 463.14498 | 17.86 | 509.45789 |
| 17.88 | 438.82564 | 17.88 | 653.17922 | 17.88 | 671.6068 | 17.88 | 468.99051 | 17.88 | 510.01829 |
| 17.9 | 439.30885 | 17.9 | 653.06447 | 17.9 | 671.15984 | 17.9 | 471.62648 | 17.9 | 511.45319 |
| 17.92 | 442.4416 | 17.92 | 654.80874 | 17.92 | 680.0064 | 17.92 | 474.74866 | 17.92 | 512.59988 |
| 17.94 | 444.97546 | 17.94 | 658.22105 | 17.94 | 679.81915 | 17.94 | 472.56081 | 17.94 | 512.16611 |
| 17.96 | 447.33357 | 17.96 | 661.02159 | 17.96 | 685.93782 | 17.96 | 474.08388 | 17.96 | 516.80629 |
| 17.98 | 446.39638 | 17.98 | 661.74698 | 17.98 | 690.4251 | 17.98 | 475.42858 | 17.98 | 524.29796 |
| 18 | 453.7903 | 18 | 662.67169 | 18 | 696.288 | 18 | 477.86709 | 18 | 528.39771 |
| 18.02 | 456.54178 | 18.02 | 662.0873 | 18.02 | 701.47405 | 18.02 | 476.65039 | 18.02 | 536.70047 |
| 18.04 | 461.70005 | 18.04 | 664.28515 | 18.04 | 708.05138 | 18.04 | 476.76517 | 18.04 | 544.96436 |
| 18.06 | 463.1344 | 18.06 | 670.42251 | 18.06 | 713.61191 | 18.06 | 475.80574 | 18.06 | 548.72361 |
| 18.08 | 466.94159 | 18.08 | 668.29355 | 18.08 | 721.72345 | 18.08 | 476.57549 | 18.08 | 551.40695 |
| 18.1 | 466.4744 | 18.1 | 664.10547 | 18.1 | 723.63325 | 18.1 | 479.05159 | 18.1 | 551.46471 |
| 18.12 | 466.85662 | 18.12 | 666.86733 | 18.12 | 734.3147 | 18.12 | 484.04169 | 18.12 | 558.02847 |
| 18.14 | 469.47729 | 18.14 | 666.68348 | 18.14 | 742.81413 | 18.14 | 491.29005 | 18.14 | 557.63605 |
| 18.16 | 471.39124 | 18.16 | 668.10046 | 18.16 | 747.44184 | 18.16 | 493.87997 | 18.16 | 561.26164 |
| 18.18 | 474.67367 | 18.18 | 672.37594 | 18.18 | 751.47437 | 18.18 | 498.18053 | 18.18 | 562.29281 |
| 18.2 | 477.5501 | 18.2 | 677.36153 | 18.2 | 756.54339 | 18.2 | 500.32119 | 18.2 | 566.48581 |
| 18.22 | 477.4712 | 18.22 | 681.67476 | 18.22 | 763.40386 | 18.22 | 502.42959 | 18.22 | 574.05245 |
| 18.24 | 474.45112 | 18.24 | 680.41519 | 18.24 | 771.44878 | 18.24 | 511.87848 | 18.24 | 574.7882 |
| 18.26 | 477.19447 | 18.26 | 682.10794 | 18.26 | 772.43994 | 18.26 | 513.38191 | 18.26 | 583.32693 |
| 18.28 | 475.8001 | 18.28 | 681.53922 | 18.28 | 778.8276 | 18.28 | 520.0157 | 18.28 | 588.05749 |
| 18.3 | 478.5812 | 18.3 | 683.46053 | 18.3 | 790.8645 | 18.3 | 524.95862 | 18.3 | 594.91912 |
| 18.32 | 477.25727 | 18.32 | 683.13473 | 18.32 | 797.96806 | 18.32 | 526.84617 | 18.32 | 599.59215 |
| 18.34 | 475.25703 | 18.34 | 688.25225 | 18.34 | 796.69424 | 18.34 | 536.07174 | 18.34 | 602.02236 |
| 18.36 | 475.85916 | 18.36 | 690.84838 | 18.36 | 795.30612 | 18.36 | 542.77538 | 18.36 | 609.36191 |
| 18.38 | 480.89664 | 18.38 | 689.85118 | 18.38 | 804.6051 | 18.38 | 544.98987 | 18.38 | 610.74396 |
| 18.4 | 480.85172 | 18.4 | 692.61701 | 18.4 | 813.95751 | 18.4 | 548.79857 | 18.4 | 614.51963 |
| 18.42 | 479.5897 | 18.42 | 692.32876 | 18.42 | 820.06974 | 18.42 | 548.1385 | 18.42 | 612.53449 |
| 18.44 | 481.64411 | 18.44 | 688.56771 | 18.44 | 827.41661 | 18.44 | 553.21733 | 18.44 | 618.89386 |
| 18.46 | 479.2345 | 18.46 | 692.68104 | 18.46 | 831.66414 | 18.46 | 557.13984 | 18.46 | 622.8428 |
| 18.48 | 479.4897 | 18.48 | 699.43448 | 18.48 | 836.07862 | 18.48 | 558.39375 | 18.48 | 623.04269 |
| 18.5 | 480.78457 | 18.5 | 700.451 | 18.5 | 844.78546 | 18.5 | 564.31047 | 18.5 | 634.73868 |
| 18.52 | 482.82861 | 18.52 | 704.33143 | 18.52 | 850.99188 | 18.52 | 571.38142 | 18.52 | 638.95149 |
| 18.54 | 483.85598 | 18.54 | 712.48204 | 18.54 | 862.19671 | 18.54 | 576.59954 | 18.54 | 645.29025 |
| 18.56 | 488.55352 | 18.56 | 721.15361 | 18.56 | 865.84051 | 18.56 | 579.66624 | 18.56 | 650.80698 |
| 18.58 | 490.65344 | 18.58 | 725.84266 | 18.58 | 869.08613 | 18.58 | 583.12402 | 18.58 | 659.12597 |
| 18.6 | 495.16452 | 18.6 | 736.47278 | 18.6 | 876.87642 | 18.6 | 581.67532 | 18.6 | 667.86152 |
| 18.62 | 500.18313 | 18.62 | 747.64648 | 18.62 | 878.06122 | 18.62 | 589.94014 | 18.62 | 671.03203 |
| 18.64 | 507.85829 | 18.64 | 755.87579 | 18.64 | 887.90872 | 18.64 | 596.65038 | 18.64 | 675.48419 |
| 18.66 | 514.45095 | 18.66 | 766.16691 | 18.66 | 892.75858 | 18.66 | 599.01774 | 18.66 | 691.6631 |
| 18.68 | 521.52925 | 18.68 | 775.56067 | 18.68 | 898.64044 | 18.68 | 605.13133 | 18.68 | 695.0203 |
| 18.7 | 520.5445 | 18.7 | 781.36053 | 18.7 | 894.16118 | 18.7 | 609.26844 | 18.7 | 696.61811 |
| 18.72 | 524.13272 | 18.72 | 793.34704 | 18.72 | 897.10717 | 18.72 | 621.68379 | 18.72 | 706.16495 |
| 18.74 | 524.30526 | 18.74 | 810.47577 | 18.74 | 899.71876 | 18.74 | 629.60187 | 18.74 | 709.51194 |
| 18.76 | 529.31142 | 18.76 | 812.14785 | 18.76 | 905.59807 | 18.76 | 637.48936 | 18.76 | 713.05108 |
| 18.78 | 528.89844 | 18.78 | 826.84526 | 18.78 | 910.38932 | 18.78 | 642.60181 | 18.78 | 720.5097 |
| 18.8 | 534.69888 | 18.8 | 836.63071 | 18.8 | 913.75585 | 18.8 | 648.09569 | 18.8 | 726.85281 |
| 18.82 | 536.08188 | 18.82 | 840.73859 | 18.82 | 921.20832 | 18.82 | 652.7489 | 18.82 | 726.07835 |
| 18.84 | 539.39152 | 18.84 | 850.68958 | 18.84 | 928.49753 | 18.84 | 655.21667 | 18.84 | 731.73059 |
| 18.86 | 547.64746 | 18.86 | 852.36602 | 18.86 | 935.90046 | 18.86 | 660.45877 | 18.86 | 739.33449 |
| 18.88 | 550.95784 | 18.88 | 862.57028 | 18.88 | 942.31045 | 18.88 | 663.28878 | 18.88 | 747.8398 |
| 18.9 | 560.18436 | 18.9 | 867.84653 | 18.9 | 948.8018 | 18.9 | 664.72653 | 18.9 | 753.68735 |
| 18.92 | 566.26002 | 18.92 | 874.15546 | 18.92 | 957.28764 | 18.92 | 669.15832 | 18.92 | 760.91189 |
| 18.94 | 568.22591 | 18.94 | 883.89881 | 18.94 | 965.89212 | 18.94 | 673.38984 | 18.94 | 776.37774 |
| 18.96 | 575.54864 | 18.96 | 884.49272 | 18.96 | 981.08207 | 18.96 | 677.34049 | 18.96 | 789.03049 |
| 18.98 | 581.06064 | 18.98 | 890.08673 | 18.98 | 993.94362 | 18.98 | 681.66749 | 18.98 | 801.40433 |
| 19 | 589.06026 | 19 | 897.51938 | 19 | 1001.86141 | 19 | 686.70007 | 19 | 806.3033 |
| 19.02 | 597.89094 | 19.02 | 906.2104 | 19.02 | 1009.14216 | 19.02 | 690.1762 | 19.02 | 822.42752 |
| 19.04 | 602.4573 | 19.04 | 916.82597 | 19.04 | 1025.02936 | 19.04 | 696.95228 | 19.04 | 826.84187 |
| 19.06 | 611.61341 | 19.06 | 922.66897 | 19.06 | 1032.75273 | 19.06 | 703.41828 | 19.06 | 841.44679 |
| 19.08 | 612.21346 | 19.08 | 921.44622 | 19.08 | 1045.13516 | 19.08 | 711.57454 | 19.08 | 851.28804 |
| 19.1 | 614.29032 | 19.1 | 929.60486 | 19.1 | 1056.131 | 19.1 | 719.47561 | 19.1 | 861.7344 |
| 19.12 | 618.98163 | 19.12 | 937.35986 | 19.12 | 1067.59174 | 19.12 | 729.15702 | 19.12 | 875.84342 |
| 19.14 | 622.40714 | 19.14 | 936.72358 | 19.14 | 1075.50036 | 19.14 | 736.2036 | 19.14 | 883.14482 |
| 19.16 | 629.54358 | 19.16 | 940.15282 | 19.16 | 1089.19952 | 19.16 | 737.20477 | 19.16 | 889.32561 |
| 19.18 | 635.11033 | 19.18 | 944.73214 | 19.18 | 1102.90394 | 19.18 | 740.08042 | 19.18 | 897.27286 |
| 19.2 | 636.31328 | 19.2 | 946.90209 | 19.2 | 1119.85598 | 19.2 | 749.37621 | 19.2 | 908.79323 |
| 19.22 | 636.25683 | 19.22 | 947.42034 | 19.22 | 1132.85152 | 19.22 | 756.72395 | 19.22 | 921.5204 |
| 19.24 | 639.6529 | 19.24 | 954.66939 | 19.24 | 1142.37437 | 19.24 | 760.59425 | 19.24 | 931.91124 |
| 19.26 | 646.96052 | 19.26 | 964.80864 | 19.26 | 1152.30681 | 19.26 | 768.44715 | 19.26 | 946.27796 |
| 19.28 | 652.22884 | 19.28 | 973.92388 | 19.28 | 1166.1648 | 19.28 | 774.49283 | 19.28 | 957.458 |
| 19.3 | 659.57232 | 19.3 | 981.9236 | 19.3 | 1181.71845 | 19.3 | 783.03642 | 19.3 | 966.82753 |
| 19.32 | 670.09237 | 19.32 | 989.48512 | 19.32 | 1194.09025 | 19.32 | 789.64726 | 19.32 | 976.16005 |
| 19.34 | 677.45795 | 19.34 | 998.35819 | 19.34 | 1199.66466 | 19.34 | 799.91232 | 19.34 | 983.53236 |
| 19.36 | 683.3705 | 19.36 | 1005.18449 | 19.36 | 1216.83154 | 19.36 | 810.06847 | 19.36 | 988.98789 |
| 19.38 | 692.89696 | 19.38 | 1011.78173 | 19.38 | 1234.98826 | 19.38 | 818.57529 | 19.38 | 993.42321 |
| 19.4 | 699.78706 | 19.4 | 1012.82819 | 19.4 | 1248.23746 | 19.4 | 821.10508 | 19.4 | 1005.83966 |
| 19.42 | 702.91737 | 19.42 | 1020.80995 | 19.42 | 1263.24653 | 19.42 | 829.26279 | 19.42 | 1018.78961 |
| 19.44 | 707.81593 | 19.44 | 1024.48868 | 19.44 | 1280.08793 | 19.44 | 839.8424 | 19.44 | 1034.33428 |
| 19.46 | 710.3394 | 19.46 | 1035.50081 | 19.46 | 1294.97063 | 19.46 | 845.15634 | 19.46 | 1038.29751 |
| 19.48 | 717.52942 | 19.48 | 1050.17673 | 19.48 | 1315.74907 | 19.48 | 857.61879 | 19.48 | 1044.61601 |
| 19.5 | 727.94397 | 19.5 | 1062.1563 | 19.5 | 1341.61699 | 19.5 | 867.00275 | 19.5 | 1057.22608 |
| 19.52 | 733.43145 | 19.52 | 1075.07862 | 19.52 | 1356.06024 | 19.52 | 874.0521 | 19.52 | 1064.16086 |
| 19.54 | 737.92096 | 19.54 | 1094.74695 | 19.54 | 1374.52811 | 19.54 | 882.68247 | 19.54 | 1068.8752 |
| 19.56 | 739.12672 | 19.56 | 1107.25919 | 19.56 | 1397.20201 | 19.56 | 892.48825 | 19.56 | 1076.04212 |
| 19.58 | 741.60139 | 19.58 | 1111.62048 | 19.58 | 1420.77128 | 19.58 | 902.51524 | 19.58 | 1082.29424 |
| 19.6 | 743.25267 | 19.6 | 1133.45424 | 19.6 | 1438.83504 | 19.6 | 907.76951 | 19.6 | 1088.29689 |
| 19.62 | 754.69455 | 19.62 | 1149.66056 | 19.62 | 1449.63816 | 19.62 | 920.13266 | 19.62 | 1092.91691 |
| 19.64 | 759.92641 | 19.64 | 1158.8204 | 19.64 | 1467.58831 | 19.64 | 923.67322 | 19.64 | 1101.19477 |
| 19.66 | 763.80849 | 19.66 | 1177.24916 | 19.66 | 1472.49475 | 19.66 | 930.55539 | 19.66 | 1108.82916 |
| 19.68 | 769.92748 | 19.68 | 1187.21102 | 19.68 | 1491.38792 | 19.68 | 934.99283 | 19.68 | 1109.28339 |
| 19.7 | 770.68795 | 19.7 | 1207.31686 | 19.7 | 1496.89166 | 19.7 | 946.77886 | 19.7 | 1119.95265 |
| 19.72 | 775.21606 | 19.72 | 1228.04276 | 19.72 | 1519.99868 | 19.72 | 960.53313 | 19.72 | 1131.02669 |
| 19.74 | 785.72079 | 19.74 | 1236.60086 | 19.74 | 1535.57079 | 19.74 | 966.8176 | 19.74 | 1132.02583 |
| 19.76 | 797.16383 | 19.76 | 1237.95134 | 19.76 | 1543.37064 | 19.76 | 978.00225 | 19.76 | 1137.16258 |
| 19.78 | 801.59216 | 19.78 | 1251.65345 | 19.78 | 1560.32054 | 19.78 | 984.94163 | 19.78 | 1145.50023 |
| 19.8 | 814.34987 | 19.8 | 1265.26513 | 19.8 | 1577.582 | 19.8 | 992.8724 | 19.8 | 1152.92932 |
| 19.82 | 818.4728 | 19.82 | 1283.50603 | 19.82 | 1594.03653 | 19.82 | 1001.16191 | 19.82 | 1160.78273 |
| 19.84 | 829.41715 | 19.84 | 1302.42806 | 19.84 | 1607.65975 | 19.84 | 1013.61663 | 19.84 | 1183.32692 |
| 19.86 | 831.86346 | 19.86 | 1313.69175 | 19.86 | 1627.27564 | 19.86 | 1022.45783 | 19.86 | 1189.62187 |
| 19.88 | 838.0029 | 19.88 | 1326.93253 | 19.88 | 1644.11409 | 19.88 | 1031.34251 | 19.88 | 1203.22211 |
| 19.9 | 847.06783 | 19.9 | 1342.52906 | 19.9 | 1659.72782 | 19.9 | 1049.41238 | 19.9 | 1209.74869 |
| 19.92 | 850.18172 | 19.92 | 1354.48978 | 19.92 | 1675.4988 | 19.92 | 1061.13697 | 19.92 | 1224.45203 |
| 19.94 | 853.26464 | 19.94 | 1375.44088 | 19.94 | 1696.18156 | 19.94 | 1072.96204 | 19.94 | 1242.67566 |
| 19.96 | 860.79971 | 19.96 | 1383.11912 | 19.96 | 1712.87367 | 19.96 | 1077.38707 | 19.96 | 1252.22123 |
| 19.98 | 865.62871 | 19.98 | 1396.31567 | 19.98 | 1724.05008 | 19.98 | 1087.81329 | 19.98 | 1265.40693 |
| 20 | 866.17599 | 20 | 1403.67363 | 20 | 1727.61881 | 20 | 1094.74162 | 20 | 1268.58446 |
| 20.02 | 872.71764 | 20.02 | 1417.33051 | 20.02 | 1741.24248 | 20.02 | 1102.43224 | 20.02 | 1283.99415 |
| 20.04 | 878.76779 | 20.04 | 1427.16357 | 20.04 | 1758.10548 | 20.04 | 1113.40443 | 20.04 | 1289.42542 |
| 20.06 | 885.52026 | 20.06 | 1429.35547 | 20.06 | 1762.39194 | 20.06 | 1120.97093 | 20.06 | 1303.49462 |
| 20.08 | 883.45065 | 20.08 | 1434.35343 | 20.08 | 1775.6415 | 20.08 | 1132.64464 | 20.08 | 1313.88774 |
| 20.1 | 890.07442 | 20.1 | 1449.27982 | 20.1 | 1781.46218 | 20.1 | 1137.07148 | 20.1 | 1325.18374 |
| 20.12 | 897.78221 | 20.12 | 1461.14945 | 20.12 | 1790.8809 | 20.12 | 1139.91242 | 20.12 | 1339.58368 |
| 20.14 | 899.53215 | 20.14 | 1469.44182 | 20.14 | 1807.84657 | 20.14 | 1139.81103 | 20.14 | 1351.14845 |
| 20.16 | 905.73804 | 20.16 | 1480.16328 | 20.16 | 1824.23531 | 20.16 | 1145.96374 | 20.16 | 1362.8795 |
| 20.18 | 908.97839 | 20.18 | 1486.02158 | 20.18 | 1834.048 | 20.18 | 1149.36145 | 20.18 | 1383.61567 |
| 20.2 | 916.74737 | 20.2 | 1501.56421 | 20.2 | 1847.94542 | 20.2 | 1158.55499 | 20.2 | 1401.41955 |
| 20.22 | 921.24559 | 20.22 | 1514.13017 | 20.22 | 1856.0476 | 20.22 | 1164.00819 | 20.22 | 1416.38665 |
| 20.24 | 928.12789 | 20.24 | 1533.44394 | 20.24 | 1865.3812 | 20.24 | 1173.25176 | 20.24 | 1429.21423 |
| 20.26 | 931.80174 | 20.26 | 1536.58643 | 20.26 | 1878.9501 | 20.26 | 1185.74048 | 20.26 | 1441.15873 |
| 20.28 | 938.34398 | 20.28 | 1544.26563 | 20.28 | 1897.96807 | 20.28 | 1190.77555 | 20.28 | 1455.35971 |
| 20.3 | 938.56106 | 20.3 | 1552.1433 | 20.3 | 1911.85267 | 20.3 | 1199.06796 | 20.3 | 1466.45532 |
| 20.32 | 949.51586 | 20.32 | 1570.73911 | 20.32 | 1928.07394 | 20.32 | 1204.20619 | 20.32 | 1474.02981 |
| 20.34 | 956.08709 | 20.34 | 1587.07609 | 20.34 | 1943.34359 | 20.34 | 1215.53747 | 20.34 | 1488.41119 |
| 20.36 | 960.03669 | 20.36 | 1600.01941 | 20.36 | 1963.93576 | 20.36 | 1225.70652 | 20.36 | 1499.0558 |
| 20.38 | 966.07014 | 20.38 | 1610.28251 | 20.38 | 1984.17769 | 20.38 | 1224.91279 | 20.38 | 1510.33891 |
| 20.4 | 968.24521 | 20.4 | 1620.68304 | 20.4 | 1999.35279 | 20.4 | 1222.04305 | 20.4 | 1529.00217 |
| 20.42 | 971.5597 | 20.42 | 1640.13126 | 20.42 | 2027.54037 | 20.42 | 1232.91759 | 20.42 | 1540.75727 |
| 20.44 | 974.07378 | 20.44 | 1646.08603 | 20.44 | 2051.28609 | 20.44 | 1236.11827 | 20.44 | 1554.36434 |
| 20.46 | 979.81315 | 20.46 | 1663.99936 | 20.46 | 2072.56213 | 20.46 | 1239.9106 | 20.46 | 1569.15011 |
| 20.48 | 984.91289 | 20.48 | 1680.38906 | 20.48 | 2095.87627 | 20.48 | 1247.69564 | 20.48 | 1575.61225 |
| 20.5 | 994.79371 | 20.5 | 1690.71784 | 20.5 | 2111.50571 | 20.5 | 1259.67105 | 20.5 | 1586.8055 |
| 20.52 | 1000.47028 | 20.52 | 1698.74266 | 20.52 | 2136.94653 | 20.52 | 1266.30271 | 20.52 | 1598.81757 |
| 20.54 | 1006.98946 | 20.54 | 1718.47724 | 20.54 | 2160.1052 | 20.54 | 1275.23927 | 20.54 | 1607.90471 |
| 20.56 | 1013.73696 | 20.56 | 1724.37647 | 20.56 | 2169.70523 | 20.56 | 1279.41047 | 20.56 | 1609.24829 |
| 20.58 | 1021.47072 | 20.58 | 1744.30227 | 20.58 | 2178.21795 | 20.58 | 1283.32168 | 20.58 | 1620.31856 |
| 20.6 | 1034.46282 | 20.6 | 1768.93251 | 20.6 | 2191.58564 | 20.6 | 1279.9803 | 20.6 | 1636.00615 |
| 20.62 | 1045.05405 | 20.62 | 1783.68637 | 20.62 | 2195.45283 | 20.62 | 1293.34108 | 20.62 | 1644.97555 |
| 20.64 | 1050.89735 | 20.64 | 1789.72261 | 20.64 | 2201.77432 | 20.64 | 1303.74267 | 20.64 | 1656.86715 |
| 20.66 | 1059.85275 | 20.66 | 1811.06906 | 20.66 | 2208.606 | 20.66 | 1318.66749 | 20.66 | 1663.46454 |
| 20.68 | 1065.58027 | 20.68 | 1819.3601 | 20.68 | 2229.99003 | 20.68 | 1323.45837 | 20.68 | 1671.03663 |
| 20.7 | 1071.05975 | 20.7 | 1833.327 | 20.7 | 2227.80586 | 20.7 | 1341.44754 | 20.7 | 1690.36898 |
| 20.72 | 1078.20177 | 20.72 | 1835.62159 | 20.72 | 2255.18476 | 20.72 | 1352.96862 | 20.72 | 1702.23911 |
| 20.74 | 1093.22789 | 20.74 | 1840.61046 | 20.74 | 2266.23089 | 20.74 | 1358.15423 | 20.74 | 1717.05661 |
| 20.76 | 1099.40413 | 20.76 | 1858.35233 | 20.76 | 2275.15305 | 20.76 | 1368.23427 | 20.76 | 1736.93237 |
| 20.78 | 1106.37523 | 20.78 | 1874.6639 | 20.78 | 2282.48767 | 20.78 | 1378.28716 | 20.78 | 1763.37461 |
| 20.8 | 1115.38083 | 20.8 | 1883.76899 | 20.8 | 2295.42526 | 20.8 | 1382.81952 | 20.8 | 1794.34885 |
| 20.82 | 1121.97622 | 20.82 | 1897.96489 | 20.82 | 2317.60861 | 20.82 | 1398.08694 | 20.82 | 1823.48611 |
| 20.84 | 1127.5246 | 20.84 | 1894.28732 | 20.84 | 2345.56204 | 20.84 | 1416.05704 | 20.84 | 1857.15151 |
| 20.86 | 1124.14384 | 20.86 | 1914.1723 | 20.86 | 2378.36094 | 20.86 | 1431.05876 | 20.86 | 1874.54463 |
| 20.88 | 1137.56868 | 20.88 | 1933.29992 | 20.88 | 2400.38496 | 20.88 | 1454.02307 | 20.88 | 1899.4162 |
| 20.9 | 1140.96187 | 20.9 | 1964.98391 | 20.9 | 2429.08752 | 20.9 | 1483.32809 | 20.9 | 1918.76617 |
| 20.92 | 1139.39547 | 20.92 | 1984.51439 | 20.92 | 2448.95918 | 20.92 | 1503.47446 | 20.92 | 1940.11986 |
| 20.94 | 1142.83133 | 20.94 | 2017.9238 | 20.94 | 2485.67946 | 20.94 | 1529.3883 | 20.94 | 1963.98087 |
| 20.96 | 1148.693 | 20.96 | 2039.77313 | 20.96 | 2504.91078 | 20.96 | 1544.56794 | 20.96 | 1982.08251 |
| 20.98 | 1161.16109 | 20.98 | 2075.16485 | 20.98 | 2532.39117 | 20.98 | 1572.01739 | 20.98 | 1993.01612 |
| 21 | 1170.59796 | 21 | 2111.46211 | 21 | 2561.46131 | 21 | 1594.26882 | 21 | 2008.31061 |
| 21.02 | 1190.64209 | 21.02 | 2142.91259 | 21.02 | 2592.82747 | 21.02 | 1614.98144 | 21.02 | 2025.45557 |
| 21.04 | 1209.85826 | 21.04 | 2177.37586 | 21.04 | 2615.93392 | 21.04 | 1626.26711 | 21.04 | 2038.5024 |
| 21.06 | 1230.42393 | 21.06 | 2205.20438 | 21.06 | 2638.03837 | 21.06 | 1641.28954 | 21.06 | 2051.54481 |
| 21.08 | 1253.43152 | 21.08 | 2234.91214 | 21.08 | 2665.47222 | 21.08 | 1651.7493 | 21.08 | 2064.68297 |
| 21.1 | 1277.87158 | 21.1 | 2263.13592 | 21.1 | 2683.55373 | 21.1 | 1662.04571 | 21.1 | 2067.51332 |
| 21.12 | 1304.97845 | 21.12 | 2279.9795 | 21.12 | 2703.82792 | 21.12 | 1676.13466 | 21.12 | 2069.06587 |
| 21.14 | 1320.56484 | 21.14 | 2309.74564 | 21.14 | 2710.6405 | 21.14 | 1690.13037 | 21.14 | 2075.17871 |
| 21.16 | 1348.09703 | 21.16 | 2327.20697 | 21.16 | 2721.43314 | 21.16 | 1704.0834 | 21.16 | 2072.73993 |
| 21.18 | 1368.51355 | 21.18 | 2340.56704 | 21.18 | 2727.16184 | 21.18 | 1701.18598 | 21.18 | 2071.59942 |
| 21.2 | 1384.9295 | 21.2 | 2359.96548 | 21.2 | 2739.18332 | 21.2 | 1711.34332 | 21.2 | 2065.01721 |
| 21.22 | 1393.63876 | 21.22 | 2369.17426 | 21.22 | 2743.39628 | 21.22 | 1710.64076 | 21.22 | 2055.4691 |
| 21.24 | 1410.33129 | 21.24 | 2383.84193 | 21.24 | 2748.38463 | 21.24 | 1712.7448 | 21.24 | 2039.11015 |
| 21.26 | 1421.1984 | 21.26 | 2381.55585 | 21.26 | 2749.64677 | 21.26 | 1710.48173 | 21.26 | 2026.37992 |
| 21.28 | 1438.43862 | 21.28 | 2393.04302 | 21.28 | 2746.96473 | 21.28 | 1705.31843 | 21.28 | 2016.80161 |
| 21.3 | 1442.28366 | 21.3 | 2395.76413 | 21.3 | 2739.59847 | 21.3 | 1705.81427 | 21.3 | 1999.07542 |
| 21.32 | 1460.3673 | 21.32 | 2394.63162 | 21.32 | 2737.76479 | 21.32 | 1700.74945 | 21.32 | 1978.09585 |
| 21.34 | 1463.09744 | 21.34 | 2385.85491 | 21.34 | 2728.54286 | 21.34 | 1689.27488 | 21.34 | 1971.47618 |
| 21.36 | 1462.06164 | 21.36 | 2376.00984 | 21.36 | 2719.30195 | 21.36 | 1674.9873 | 21.36 | 1946.95068 |
| 21.38 | 1463.35242 | 21.38 | 2364.41655 | 21.38 | 2700.35582 | 21.38 | 1656.18264 | 21.38 | 1926.43101 |
| 21.4 | 1465.22849 | 21.4 | 2350.99621 | 21.4 | 2689.21253 | 21.4 | 1646.21538 | 21.4 | 1911.74425 |
| 21.42 | 1456.13847 | 21.42 | 2334.16593 | 21.42 | 2682.90871 | 21.42 | 1636.6583 | 21.42 | 1884.24696 |
| 21.44 | 1453.94884 | 21.44 | 2316.36552 | 21.44 | 2654.11469 | 21.44 | 1617.12984 | 21.44 | 1858.46498 |
| 21.46 | 1454.67406 | 21.46 | 2300.62508 | 21.46 | 2638.77972 | 21.46 | 1599.87453 | 21.46 | 1822.32442 |
| 21.48 | 1444.31401 | 21.48 | 2279.00729 | 21.48 | 2623.10755 | 21.48 | 1577.46572 | 21.48 | 1777.1874 |
| 21.5 | 1433.7033 | 21.5 | 2258.72985 | 21.5 | 2589.63922 | 21.5 | 1555.6379 | 21.5 | 1752.01506 |
| 21.52 | 1422.53508 | 21.52 | 2239.47989 | 21.52 | 2563.55251 | 21.52 | 1522.19335 | 21.52 | 1722.87659 |
| 21.54 | 1404.22618 | 21.54 | 2220.91087 | 21.54 | 2520.59139 | 21.54 | 1498.69681 | 21.54 | 1688.12818 |
| 21.56 | 1381.606 | 21.56 | 2192.62578 | 21.56 | 2480.4734 | 21.56 | 1469.70414 | 21.56 | 1651.56247 |
| 21.58 | 1365.08506 | 21.58 | 2160.07936 | 21.58 | 2448.19318 | 21.58 | 1448.42514 | 21.58 | 1634.02343 |
| 21.6 | 1351.31259 | 21.6 | 2124.27836 | 21.6 | 2413.3208 | 21.6 | 1420.01131 | 21.6 | 1606.0305 |
| 21.62 | 1325.10845 | 21.62 | 2085.95862 | 21.62 | 2373.82938 | 21.62 | 1408.71934 | 21.62 | 1576.40246 |
| 21.64 | 1298.84686 | 21.64 | 2041.86886 | 21.64 | 2333.28055 | 21.64 | 1383.95369 | 21.64 | 1551.62909 |
| 21.66 | 1270.56589 | 21.66 | 2004.36997 | 21.66 | 2300.07392 | 21.66 | 1354.73257 | 21.66 | 1530.97765 |
| 21.68 | 1246.67449 | 21.68 | 1961.28846 | 21.68 | 2266.28679 | 21.68 | 1326.71845 | 21.68 | 1520.26303 |
| 21.7 | 1222.60719 | 21.7 | 1921.34463 | 21.7 | 2229.80303 | 21.7 | 1309.09332 | 21.7 | 1509.77217 |
| 21.72 | 1199.10443 | 21.72 | 1885.03829 | 21.72 | 2204.89202 | 21.72 | 1284.21468 | 21.72 | 1496.9164 |
| 21.74 | 1173.37721 | 21.74 | 1854.0482 | 21.74 | 2164.66577 | 21.74 | 1256.99359 | 21.74 | 1488.59216 |
| 21.76 | 1144.97014 | 21.76 | 1814.51912 | 21.76 | 2129.85792 | 21.76 | 1239.00828 | 21.76 | 1489.61183 |
| 21.78 | 1118.88683 | 21.78 | 1769.98692 | 21.78 | 2112.0928 | 21.78 | 1225.28772 | 21.78 | 1483.09691 |
| 21.8 | 1086.18729 | 21.8 | 1735.53592 | 21.8 | 2097.69985 | 21.8 | 1202.84802 | 21.8 | 1478.56247 |
| 21.82 | 1059.79321 | 21.82 | 1711.11489 | 21.82 | 2084.27244 | 21.82 | 1196.8618 | 21.82 | 1470.62665 |
| 21.84 | 1029.63215 | 21.84 | 1683.19784 | 21.84 | 2070.04142 | 21.84 | 1194.81294 | 21.84 | 1456.83272 |
| 21.86 | 1003.20882 | 21.86 | 1682.43882 | 21.86 | 2056.62812 | 21.86 | 1188.01436 | 21.86 | 1436.1375 |
| 21.88 | 981.42764 | 21.88 | 1665.42592 | 21.88 | 2035.027 | 21.88 | 1189.72288 | 21.88 | 1426.31304 |
| 21.9 | 959.37642 | 21.9 | 1653.84114 | 21.9 | 2018.03417 | 21.9 | 1185.33025 | 21.9 | 1420.11439 |
| 21.92 | 939.49647 | 21.92 | 1638.74283 | 21.92 | 2006.55109 | 21.92 | 1174.63983 | 21.92 | 1411.71932 |
| 21.94 | 932.32341 | 21.94 | 1632.63048 | 21.94 | 2000.84957 | 21.94 | 1166.66005 | 21.94 | 1404.22829 |
| 21.96 | 921.7908 | 21.96 | 1614.78305 | 21.96 | 1977.91994 | 21.96 | 1152.55819 | 21.96 | 1393.72756 |
| 21.98 | 919.92366 | 21.98 | 1601.68208 | 21.98 | 1969.70215 | 21.98 | 1139.63331 | 21.98 | 1385.9163 |
| 22 | 906.58512 | 22 | 1579.92492 | 22 | 1948.82232 | 22 | 1128.32716 | 22 | 1376.79856 |
| 22.02 | 908.76707 | 22.02 | 1565.24388 | 22.02 | 1930.89405 | 22.02 | 1116.18446 | 22.02 | 1362.76328 |
| 22.04 | 907.5324 | 22.04 | 1554.32736 | 22.04 | 1906.02945 | 22.04 | 1106.58696 | 22.04 | 1350.09421 |
| 22.06 | 908.2104 | 22.06 | 1537.41691 | 22.06 | 1893.91739 | 22.06 | 1107.58417 | 22.06 | 1337.34115 |
| 22.08 | 904.96371 | 22.08 | 1527.2398 | 22.08 | 1878.63726 | 22.08 | 1100.94296 | 22.08 | 1327.91153 |
| 22.1 | 900.71231 | 22.1 | 1513.5792 | 22.1 | 1856.13604 | 22.1 | 1096.30927 | 22.1 | 1313.0776 |
| 22.12 | 897.74299 | 22.12 | 1503.84603 | 22.12 | 1834.23667 | 22.12 | 1090.40204 | 22.12 | 1305.34427 |
| 22.14 | 886.65345 | 22.14 | 1494.40751 | 22.14 | 1808.97871 | 22.14 | 1083.88526 | 22.14 | 1303.58954 |
| 22.16 | 883.76395 | 22.16 | 1467.55655 | 22.16 | 1795.59019 | 22.16 | 1071.38889 | 22.16 | 1288.36641 |
| 22.18 | 874.65263 | 22.18 | 1455.37137 | 22.18 | 1773.36031 | 22.18 | 1061.23026 | 22.18 | 1276.78098 |
| 22.2 | 868.71597 | 22.2 | 1444.75069 | 22.2 | 1758.57377 | 22.2 | 1060.14356 | 22.2 | 1265.14649 |
| 22.22 | 860.75594 | 22.22 | 1431.27689 | 22.22 | 1740.70721 | 22.22 | 1045.82007 | 22.22 | 1250.80865 |
| 22.24 | 857.84112 | 22.24 | 1420.646 | 22.24 | 1729.90234 | 22.24 | 1044.32983 | 22.24 | 1237.7093 |
| 22.26 | 847.67349 | 22.26 | 1400.96376 | 22.26 | 1714.07952 | 22.26 | 1032.39677 | 22.26 | 1232.32379 |
| 22.28 | 844.0749 | 22.28 | 1392.40426 | 22.28 | 1709.20089 | 22.28 | 1024.30693 | 22.28 | 1229.37918 |
| 22.3 | 831.5082 | 22.3 | 1381.49165 | 22.3 | 1702.28157 | 22.3 | 1013.92419 | 22.3 | 1215.17119 |
| 22.32 | 829.7374 | 22.32 | 1374.16153 | 22.32 | 1693.85098 | 22.32 | 997.60671 | 22.32 | 1209.66541 |
| 22.34 | 817.48327 | 22.34 | 1365.75013 | 22.34 | 1679.99991 | 22.34 | 987.11098 | 22.34 | 1207.6109 |
| 22.36 | 811.43764 | 22.36 | 1355.40069 | 22.36 | 1673.68374 | 22.36 | 982.00947 | 22.36 | 1195.4535 |
| 22.38 | 805.14585 | 22.38 | 1350.36746 | 22.38 | 1663.73921 | 22.38 | 975.69625 | 22.38 | 1186.88678 |
| 22.4 | 795.51143 | 22.4 | 1341.59215 | 22.4 | 1669.28522 | 22.4 | 968.39809 | 22.4 | 1181.85967 |
| 22.42 | 785.83796 | 22.42 | 1337.76313 | 22.42 | 1660.91209 | 22.42 | 960.39647 | 22.42 | 1168.82359 |
| 22.44 | 778.87421 | 22.44 | 1332.08295 | 22.44 | 1650.72231 | 22.44 | 948.72478 | 22.44 | 1151.1662 |
| 22.46 | 772.95446 | 22.46 | 1325.53806 | 22.46 | 1644.38464 | 22.46 | 941.6698 | 22.46 | 1141.02944 |
| 22.48 | 764.32365 | 22.48 | 1317.07617 | 22.48 | 1630.4712 | 22.48 | 933.487 | 22.48 | 1130.33849 |
| 22.5 | 760.40899 | 22.5 | 1322.06873 | 22.5 | 1610.803 | 22.5 | 934.18794 | 22.5 | 1126.03131 |
| 22.52 | 755.97722 | 22.52 | 1316.25535 | 22.52 | 1604.70279 | 22.52 | 932.0438 | 22.52 | 1111.64811 |
| 22.54 | 743.29008 | 22.54 | 1298.27589 | 22.54 | 1589.65642 | 22.54 | 925.9822 | 22.54 | 1106.41847 |
| 22.56 | 733.98392 | 22.56 | 1291.28007 | 22.56 | 1580.4007 | 22.56 | 922.41264 | 22.56 | 1102.02297 |
| 22.58 | 733.05043 | 22.58 | 1273.58881 | 22.58 | 1569.46245 | 22.58 | 918.60065 | 22.58 | 1100.21041 |
| 22.6 | 726.27508 | 22.6 | 1272.18719 | 22.6 | 1559.36711 | 22.6 | 911.16561 | 22.6 | 1090.40709 |
| 22.62 | 713.58075 | 22.62 | 1259.3879 | 22.62 | 1549.70034 | 22.62 | 914.35028 | 22.62 | 1085.81699 |
| 22.64 | 705.6219 | 22.64 | 1245.67051 | 22.64 | 1538.39177 | 22.64 | 909.96966 | 22.64 | 1082.75902 |
| 22.66 | 701.68071 | 22.66 | 1238.15636 | 22.66 | 1526.06081 | 22.66 | 906.76903 | 22.66 | 1079.42397 |
| 22.68 | 695.03029 | 22.68 | 1227.44429 | 22.68 | 1515.97738 | 22.68 | 904.05838 | 22.68 | 1073.58508 |
| 22.7 | 689.72779 | 22.7 | 1217.35228 | 22.7 | 1506.97099 | 22.7 | 899.17349 | 22.7 | 1067.11556 |
| 22.72 | 687.12034 | 22.72 | 1210.5803 | 22.72 | 1498.5975 | 22.72 | 892.88603 | 22.72 | 1064.4033 |
| 22.74 | 681.67025 | 22.74 | 1200.74566 | 22.74 | 1491.51757 | 22.74 | 886.96158 | 22.74 | 1062.0227 |
| 22.76 | 680.38369 | 22.76 | 1188.16255 | 22.76 | 1482.27272 | 22.76 | 890.31969 | 22.76 | 1057.58421 |
| 22.78 | 679.12865 | 22.78 | 1173.38801 | 22.78 | 1475.45126 | 22.78 | 883.31462 | 22.78 | 1033.74647 |
| 22.8 | 676.01666 | 22.8 | 1167.94134 | 22.8 | 1457.44699 | 22.8 | 874.4233 | 22.8 | 1027.31182 |
| 22.82 | 677.88382 | 22.82 | 1156.96011 | 22.82 | 1459.86276 | 22.82 | 872.84841 | 22.82 | 1014.6861 |
| 22.84 | 675.9625 | 22.84 | 1153.6781 | 22.84 | 1454.20725 | 22.84 | 876.36039 | 22.84 | 1007.70189 |
| 22.86 | 673.58305 | 22.86 | 1145.11834 | 22.86 | 1445.69581 | 22.86 | 870.72114 | 22.86 | 1001.80924 |
| 22.88 | 675.0455 | 22.88 | 1140.44107 | 22.88 | 1427.39174 | 22.88 | 868.79954 | 22.88 | 996.9887 |
| 22.9 | 681.14625 | 22.9 | 1128.63857 | 22.9 | 1421.14428 | 22.9 | 865.80685 | 22.9 | 991.06035 |
| 22.92 | 677.82738 | 22.92 | 1117.44332 | 22.92 | 1418.23863 | 22.92 | 863.37365 | 22.92 | 982.26342 |
| 22.94 | 678.46594 | 22.94 | 1108.79126 | 22.94 | 1408.04326 | 22.94 | 862.47994 | 22.94 | 972.84491 |
| 22.96 | 678.54295 | 22.96 | 1095.80527 | 22.96 | 1398.67331 | 22.96 | 858.16673 | 22.96 | 968.01473 |
| 22.98 | 674.91659 | 22.98 | 1094.12918 | 22.98 | 1389.32252 | 22.98 | 854.51226 | 22.98 | 962.20763 |
| 23 | 667.21407 | 23 | 1094.06526 | 23 | 1382.70188 | 23 | 855.87141 | 23 | 947.78201 |
| 23.02 | 674.11192 | 23.02 | 1095.92105 | 23.02 | 1379.54156 | 23.02 | 851.10952 | 23.02 | 938.30195 |
| 23.04 | 669.93102 | 23.04 | 1088.49437 | 23.04 | 1372.89718 | 23.04 | 848.7899 | 23.04 | 935.07031 |
| 23.06 | 671.27777 | 23.06 | 1090.12792 | 23.06 | 1372.39156 | 23.06 | 846.27928 | 23.06 | 933.27243 |
| 23.08 | 667.13272 | 23.08 | 1087.85206 | 23.08 | 1354.77208 | 23.08 | 838.85725 | 23.08 | 931.3263 |
| 23.1 | 665.25403 | 23.1 | 1076.04607 | 23.1 | 1341.08481 | 23.1 | 835.9693 | 23.1 | 931.89372 |
| 23.12 | 663.12751 | 23.12 | 1069.54703 | 23.12 | 1327.30871 | 23.12 | 830.34818 | 23.12 | 934.22422 |
| 23.14 | 662.67281 | 23.14 | 1061.67406 | 23.14 | 1316.99438 | 23.14 | 819.20335 | 23.14 | 934.02719 |
| 23.16 | 667.68405 | 23.16 | 1057.07673 | 23.16 | 1309.14055 | 23.16 | 803.99406 | 23.16 | 922.13701 |
| 23.18 | 668.69106 | 23.18 | 1051.64982 | 23.18 | 1310.7354 | 23.18 | 796.24663 | 23.18 | 922.0138 |
| 23.2 | 671.39704 | 23.2 | 1046.1422 | 23.2 | 1308.48032 | 23.2 | 789.76725 | 23.2 | 926.47423 |
| 23.22 | 667.53489 | 23.22 | 1046.71609 | 23.22 | 1309.63546 | 23.22 | 780.44316 | 23.22 | 928.4378 |
| 23.24 | 667.0498 | 23.24 | 1040.07181 | 23.24 | 1317.57239 | 23.24 | 777.47237 | 23.24 | 931.2654 |
| 23.26 | 665.92877 | 23.26 | 1038.46492 | 23.26 | 1314.70756 | 23.26 | 772.70424 | 23.26 | 933.92465 |
| 23.28 | 670.02246 | 23.28 | 1046.36824 | 23.28 | 1318.43056 | 23.28 | 771.02847 | 23.28 | 941.2554 |
| 23.3 | 667.22717 | 23.3 | 1045.88218 | 23.3 | 1309.75746 | 23.3 | 770.63323 | 23.3 | 942.11667 |
| 23.32 | 667.81002 | 23.32 | 1047.18716 | 23.32 | 1312.05463 | 23.32 | 775.76643 | 23.32 | 947.42585 |
| 23.34 | 667.40532 | 23.34 | 1044.40277 | 23.34 | 1311.55104 | 23.34 | 777.58733 | 23.34 | 949.04316 |
| 23.36 | 670.6281 | 23.36 | 1047.1344 | 23.36 | 1315.92779 | 23.36 | 775.21903 | 23.36 | 953.82722 |
| 23.38 | 667.13348 | 23.38 | 1050.61597 | 23.38 | 1313.1477 | 23.38 | 778.24835 | 23.38 | 948.21006 |
| 23.4 | 671.39009 | 23.4 | 1049.03586 | 23.4 | 1307.7856 | 23.4 | 783.51836 | 23.4 | 951.23126 |
| 23.42 | 673.67326 | 23.42 | 1054.82992 | 23.42 | 1298.1467 | 23.42 | 787.13867 | 23.42 | 946.98239 |
| 23.44 | 681.5681 | 23.44 | 1059.9521 | 23.44 | 1294.36329 | 23.44 | 781.98677 | 23.44 | 943.81717 |
| 23.46 | 689.67211 | 23.46 | 1059.84046 | 23.46 | 1290.20379 | 23.46 | 784.86244 | 23.46 | 946.60649 |
| 23.48 | 688.7961 | 23.48 | 1060.99508 | 23.48 | 1292.92146 | 23.48 | 782.69007 | 23.48 | 942.23134 |
| 23.5 | 685.17219 | 23.5 | 1063.29329 | 23.5 | 1289.60974 | 23.5 | 781.29799 | 23.5 | 939.22138 |
| 23.52 | 686.46422 | 23.52 | 1053.79575 | 23.52 | 1278.69394 | 23.52 | 776.21786 | 23.52 | 936.76965 |
| 23.54 | 687.07635 | 23.54 | 1047.42599 | 23.54 | 1273.44634 | 23.54 | 769.09253 | 23.54 | 934.74895 |
| 23.56 | 690.57265 | 23.56 | 1050.00356 | 23.56 | 1270.57628 | 23.56 | 774.35767 | 23.56 | 927.0506 |
| 23.58 | 686.02367 | 23.58 | 1042.98492 | 23.58 | 1260.22834 | 23.58 | 766.51622 | 23.58 | 922.94971 |
| 23.6 | 680.15548 | 23.6 | 1043.62342 | 23.6 | 1255.04665 | 23.6 | 768.83373 | 23.6 | 919.70388 |
| 23.62 | 676.90795 | 23.62 | 1034.65782 | 23.62 | 1246.56291 | 23.62 | 764.92009 | 23.62 | 912.0782 |
| 23.64 | 672.16003 | 23.64 | 1031.4026 | 23.64 | 1231.42388 | 23.64 | 760.54757 | 23.64 | 903.8908 |
| 23.66 | 671.67287 | 23.66 | 1029.50141 | 23.66 | 1214.36655 | 23.66 | 753.39131 | 23.66 | 890.96167 |
| 23.68 | 672.26914 | 23.68 | 1016.78983 | 23.68 | 1206.88287 | 23.68 | 746.23258 | 23.68 | 883.14779 |
| 23.7 | 674.7177 | 23.7 | 1010.56779 | 23.7 | 1198.10764 | 23.7 | 741.53824 | 23.7 | 868.64274 |
| 23.72 | 673.3572 | 23.72 | 998.54459 | 23.72 | 1182.26026 | 23.72 | 739.91589 | 23.72 | 856.02167 |
| 23.74 | 670.76712 | 23.74 | 990.13253 | 23.74 | 1165.6245 | 23.74 | 729.92925 | 23.74 | 840.79749 |
| 23.76 | 672.29813 | 23.76 | 979.02977 | 23.76 | 1146.58824 | 23.76 | 725.20547 | 23.76 | 820.77705 |
| 23.78 | 671.30283 | 23.78 | 965.00094 | 23.78 | 1131.77395 | 23.78 | 714.03893 | 23.78 | 803.45486 |
| 23.8 | 670.00382 | 23.8 | 961.39107 | 23.8 | 1119.77227 | 23.8 | 708.94502 | 23.8 | 799.1512 |
| 23.82 | 667.5287 | 23.82 | 951.01519 | 23.82 | 1110.35277 | 23.82 | 707.31304 | 23.82 | 783.40005 |
| 23.84 | 661.6605 | 23.84 | 941.68708 | 23.84 | 1094.00276 | 23.84 | 706.64014 | 23.84 | 773.31096 |
| 23.86 | 656.44369 | 23.86 | 926.12176 | 23.86 | 1079.26133 | 23.86 | 697.73808 | 23.86 | 758.69232 |
| 23.88 | 649.2561 | 23.88 | 919.82818 | 23.88 | 1064.28413 | 23.88 | 686.29466 | 23.88 | 743.83152 |
| 23.9 | 643.12858 | 23.9 | 900.56686 | 23.9 | 1050.99422 | 23.9 | 685.7871 | 23.9 | 730.20865 |
| 23.92 | 632.36351 | 23.92 | 890.81151 | 23.92 | 1037.56613 | 23.92 | 673.6668 | 23.92 | 719.21825 |
| 23.94 | 623.8063 | 23.94 | 878.80076 | 23.94 | 1021.08495 | 23.94 | 662.09463 | 23.94 | 703.86175 |
| 23.96 | 615.08243 | 23.96 | 869.67154 | 23.96 | 1004.19022 | 23.96 | 648.90181 | 23.96 | 691.37802 |
| 23.98 | 603.12861 | 23.98 | 859.64872 | 23.98 | 990.66948 | 23.98 | 634.58268 | 23.98 | 680.95121 |
| 24 | 592.72804 | 24 | 844.60191 | 24 | 980.84323 | 24 | 622.39573 | 24 | 669.67655 |
| 24.02 | 588.50711 | 24.02 | 828.88235 | 24.02 | 964.86179 | 24.02 | 612.02047 | 24.02 | 659.9593 |
| 24.04 | 576.54819 | 24.04 | 813.29968 | 24.04 | 949.38478 | 24.04 | 603.75054 | 24.04 | 652.67018 |
| 24.06 | 569.77567 | 24.06 | 801.92218 | 24.06 | 932.88621 | 24.06 | 590.6893 | 24.06 | 646.11493 |
| 24.08 | 559.10801 | 24.08 | 785.74227 | 24.08 | 915.96774 | 24.08 | 579.43101 | 24.08 | 640.70036 |
| 24.1 | 550.83242 | 24.1 | 769.15128 | 24.1 | 904.35217 | 24.1 | 569.45343 | 24.1 | 635.55218 |
| 24.12 | 543.40738 | 24.12 | 754.52493 | 24.12 | 890.64828 | 24.12 | 556.14398 | 24.12 | 629.00203 |
| 24.14 | 536.25866 | 24.14 | 742.34439 | 24.14 | 885.81369 | 24.14 | 547.28441 | 24.14 | 622.44431 |
| 24.16 | 529.31306 | 24.16 | 731.81462 | 24.16 | 880.34499 | 24.16 | 539.22913 | 24.16 | 612.60133 |
| 24.18 | 519.27658 | 24.18 | 724.78376 | 24.18 | 872.04064 | 24.18 | 533.25524 | 24.18 | 613.84173 |
| 24.2 | 512.27942 | 24.2 | 723.3657 | 24.2 | 864.32407 | 24.2 | 532.98118 | 24.2 | 608.04505 |
| 24.22 | 504.78 | 24.22 | 715.31784 | 24.22 | 860.61418 | 24.22 | 527.1613 | 24.22 | 600.48053 |
| 24.24 | 499.00337 | 24.24 | 706.14378 | 24.24 | 849.27162 | 24.24 | 525.08009 | 24.24 | 596.73356 |
| 24.26 | 493.92491 | 24.26 | 703.44609 | 24.26 | 835.48423 | 24.26 | 523.443 | 24.26 | 595.1114 |
| 24.28 | 491.18476 | 24.28 | 694.0657 | 24.28 | 827.89962 | 24.28 | 517.04233 | 24.28 | 594.87054 |
| 24.3 | 483.3105 | 24.3 | 685.41241 | 24.3 | 822.14686 | 24.3 | 516.34601 | 24.3 | 590.51822 |
| 24.32 | 478.025 | 24.32 | 680.31311 | 24.32 | 816.56816 | 24.32 | 508.40472 | 24.32 | 587.29655 |
| 24.34 | 474.20176 | 24.34 | 665.83203 | 24.34 | 805.65987 | 24.34 | 500.99211 | 24.34 | 580.52706 |
| 24.36 | 472.01258 | 24.36 | 664.18212 | 24.36 | 800.51681 | 24.36 | 496.88537 | 24.36 | 577.46621 |
| 24.38 | 471.00728 | 24.38 | 658.581 | 24.38 | 792.70009 | 24.38 | 497.88236 | 24.38 | 571.60879 |
| 24.4 | 470.381 | 24.4 | 654.34532 | 24.4 | 781.86578 | 24.4 | 491.73103 | 24.4 | 570.40758 |
| 24.42 | 466.04645 | 24.42 | 648.91523 | 24.42 | 779.36885 | 24.42 | 486.19203 | 24.42 | 561.32906 |
| 24.44 | 465.3003 | 24.44 | 645.42024 | 24.44 | 778.30117 | 24.44 | 482.25933 | 24.44 | 552.08934 |
| 24.46 | 455.17624 | 24.46 | 633.2248 | 24.46 | 773.17613 | 24.46 | 481.49393 | 24.46 | 548.00204 |
| 24.48 | 449.44147 | 24.48 | 625.75711 | 24.48 | 766.37247 | 24.48 | 473.77139 | 24.48 | 539.37103 |
| 24.5 | 447.86934 | 24.5 | 615.45432 | 24.5 | 754.12683 | 24.5 | 466.88087 | 24.5 | 530.65019 |
| 24.52 | 444.52517 | 24.52 | 606.05396 | 24.52 | 742.79608 | 24.52 | 464.53617 | 24.52 | 524.94091 |
| 24.54 | 441.2765 | 24.54 | 600.75522 | 24.54 | 742.36581 | 24.54 | 460.10306 | 24.54 | 515.0111 |
| 24.56 | 431.92692 | 24.56 | 597.76856 | 24.56 | 731.91633 | 24.56 | 456.15431 | 24.56 | 514.76911 |
| 24.58 | 424.80557 | 24.58 | 595.59145 | 24.58 | 720.45948 | 24.58 | 443.48393 | 24.58 | 513.40348 |
| 24.6 | 422.05599 | 24.6 | 586.92026 | 24.6 | 714.5509 | 24.6 | 439.3317 | 24.6 | 509.47737 |
| 24.62 | 419.90946 | 24.62 | 580.04372 | 24.62 | 701.6297 | 24.62 | 431.69656 | 24.62 | 500.66593 |
| 24.64 | 414.16417 | 24.64 | 572.98014 | 24.64 | 690.86141 | 24.64 | 431.09575 | 24.64 | 497.35535 |
| 24.66 | 412.78306 | 24.66 | 566.21707 | 24.66 | 685.02453 | 24.66 | 428.09587 | 24.66 | 493.19631 |
| 24.68 | 410.62827 | 24.68 | 554.83289 | 24.68 | 672.49291 | 24.68 | 424.13729 | 24.68 | 490.55392 |
| 24.7 | 406.71294 | 24.7 | 547.61997 | 24.7 | 663.50931 | 24.7 | 420.1206 | 24.7 | 485.21311 |
| 24.72 | 401.31003 | 24.72 | 542.88168 | 24.72 | 651.57096 | 24.72 | 416.1411 | 24.72 | 482.76892 |
| 24.74 | 396.17609 | 24.74 | 541.25744 | 24.74 | 647.49726 | 24.74 | 407.77416 | 24.74 | 482.10319 |
| 24.76 | 392.74942 | 24.76 | 537.01552 | 24.76 | 643.34125 | 24.76 | 408.2047 | 24.76 | 478.02989 |
| 24.78 | 385.52181 | 24.78 | 530.70053 | 24.78 | 638.36152 | 24.78 | 405.5944 | 24.78 | 480.58222 |
| 24.8 | 382.36488 | 24.8 | 528.32958 | 24.8 | 633.22645 | 24.8 | 405.35846 | 24.8 | 479.3321 |
| 24.82 | 375.13426 | 24.82 | 521.11877 | 24.82 | 626.37109 | 24.82 | 401.66715 | 24.82 | 471.60014 |
| 24.84 | 368.89157 | 24.84 | 516.02071 | 24.84 | 620.42023 | 24.84 | 397.8579 | 24.84 | 470.66579 |
| 24.86 | 366.38999 | 24.86 | 511.92644 | 24.86 | 612.07876 | 24.86 | 391.9514 | 24.86 | 463.94405 |
| 24.88 | 360.47308 | 24.88 | 507.84764 | 24.88 | 601.83298 | 24.88 | 389.14292 | 24.88 | 458.99774 |
| 24.9 | 359.23125 | 24.9 | 502.85998 | 24.9 | 593.67425 | 24.9 | 387.58928 | 24.9 | 453.70374 |
| 24.92 | 352.58179 | 24.92 | 503.30393 | 24.92 | 586.32 | 24.92 | 379.72464 | 24.92 | 452.73599 |
| 24.94 | 349.72443 | 24.94 | 495.42153 | 24.94 | 578.51011 | 24.94 | 375.66963 | 24.94 | 447.78344 |
| 24.96 | 345.79854 | 24.96 | 491.54301 | 24.96 | 571.98827 | 24.96 | 374.30625 | 24.96 | 444.86077 |
| 24.98 | 343.05405 | 24.98 | 488.48857 | 24.98 | 563.62228 | 24.98 | 373.27319 | 24.98 | 443.38848 |
| 25 | 336.57051 | 25 | 490.09527 | 25 | 557.84564 | 25 | 370.95264 | 25 | 437.10369 |
| 25.02 | 336.68225 | 25.02 | 488.56748 | 25.02 | 548.53249 | 25.02 | 370.14421 | 25.02 | 434.99869 |
| 25.04 | 330.08583 | 25.04 | 482.73873 | 25.04 | 542.33963 | 25.04 | 368.73797 | 25.04 | 431.569 |
| 25.06 | 327.59406 | 25.06 | 482.33572 | 25.06 | 533.66126 | 25.06 | 364.22449 | 25.06 | 432.67849 |
| 25.08 | 324.54396 | 25.08 | 485.56435 | 25.08 | 528.05129 | 25.08 | 362.45567 | 25.08 | 427.38997 |
| 25.1 | 323.59999 | 25.1 | 480.58445 | 25.1 | 525.74906 | 25.1 | 362.71466 | 25.1 | 423.34949 |
| 25.12 | 323.39803 | 25.12 | 480.30885 | 25.12 | 520.87182 | 25.12 | 360.07417 | 25.12 | 422.52255 |
| 25.14 | 320.95518 | 25.14 | 482.71076 | 25.14 | 520.90748 | 25.14 | 355.65428 | 25.14 | 413.09518 |
| 25.16 | 322.5005 | 25.16 | 482.48199 | 25.16 | 515.24049 | 25.16 | 351.92317 | 25.16 | 405.33301 |
| 25.18 | 319.46021 | 25.18 | 483.30439 | 25.18 | 506.63367 | 25.18 | 349.37742 | 25.18 | 398.26376 |
| 25.2 | 316.54829 | 25.2 | 482.57731 | 25.2 | 506.47436 | 25.2 | 348.46423 | 25.2 | 395.40472 |
| 25.22 | 315.95938 | 25.22 | 476.37937 | 25.22 | 499.72995 | 25.22 | 343.75479 | 25.22 | 396.24978 |
| 25.24 | 309.82976 | 25.24 | 475.72704 | 25.24 | 495.50657 | 25.24 | 344.38769 | 25.24 | 391.72118 |
| 25.26 | 307.11491 | 25.26 | 471.36418 | 25.26 | 492.02482 | 25.26 | 341.07561 | 25.26 | 385.59703 |
| 25.28 | 307.78914 | 25.28 | 471.07784 | 25.28 | 485.30514 | 25.28 | 337.93359 | 25.28 | 380.38608 |
| 25.3 | 306.358 | 25.3 | 467.3069 | 25.3 | 481.1767 | 25.3 | 336.47378 | 25.3 | 374.54034 |
| 25.32 | 301.98736 | 25.32 | 464.73551 | 25.32 | 476.74115 | 25.32 | 328.71673 | 25.32 | 369.21805 |
| 25.34 | 304.4706 | 25.34 | 460.82035 | 25.34 | 479.41938 | 25.34 | 328.25427 | 25.34 | 361.01782 |
| 25.36 | 309.07226 | 25.36 | 462.10596 | 25.36 | 482.20349 | 25.36 | 328.92113 | 25.36 | 356.52035 |
| 25.38 | 311.457 | 25.38 | 457.23666 | 25.38 | 475.47192 | 25.38 | 325.58999 | 25.38 | 355.98299 |
| 25.4 | 311.28485 | 25.4 | 453.71714 | 25.4 | 468.98196 | 25.4 | 320.98458 | 25.4 | 352.90911 |
| 25.42 | 314.29266 | 25.42 | 450.08815 | 25.42 | 467.55137 | 25.42 | 320.52911 | 25.42 | 348.70572 |
| 25.44 | 311.42923 | 25.44 | 447.63961 | 25.44 | 464.34951 | 25.44 | 316.59507 | 25.44 | 345.21622 |
| 25.46 | 313.24221 | 25.46 | 441.80427 | 25.46 | 463.63542 | 25.46 | 311.44677 | 25.46 | 340.69875 |
| 25.48 | 315.56238 | 25.48 | 440.08906 | 25.48 | 459.21684 | 25.48 | 305.12312 | 25.48 | 337.02935 |
| 25.5 | 315.62299 | 25.5 | 440.24932 | 25.5 | 457.44347 | 25.5 | 302.39543 | 25.5 | 333.35919 |
| 25.52 | 313.48477 | 25.52 | 442.23408 | 25.52 | 454.8698 | 25.52 | 296.14822 | 25.52 | 333.47056 |
| 25.54 | 315.7036 | 25.54 | 445.01954 | 25.54 | 450.86762 | 25.54 | 290.40139 | 25.54 | 332.89506 |
| 25.56 | 314.53202 | 25.56 | 444.78833 | 25.56 | 446.50265 | 25.56 | 285.93546 | 25.56 | 335.98478 |
| 25.58 | 318.43867 | 25.58 | 439.86125 | 25.58 | 443.88784 | 25.58 | 280.94537 | 25.58 | 334.41851 |
| 25.6 | 318.59686 | 25.6 | 433.76429 | 25.6 | 442.8814 | 25.6 | 277.77016 | 25.6 | 331.43221 |
| 25.62 | 320.57897 | 25.62 | 430.21023 | 25.62 | 436.58947 | 25.62 | 276.08666 | 25.62 | 328.40421 |
| 25.64 | 320.8557 | 25.64 | 427.3959 | 25.64 | 434.45973 | 25.64 | 276.52421 | 25.64 | 326.5076 |
| 25.66 | 322.40029 | 25.66 | 424.04721 | 25.66 | 429.90526 | 25.66 | 273.10623 | 25.66 | 323.07188 |
| 25.68 | 322.96013 | 25.68 | 417.46003 | 25.68 | 425.15715 | 25.68 | 269.34945 | 25.68 | 321.91367 |
| 25.7 | 319.86436 | 25.7 | 413.59129 | 25.7 | 425.63773 | 25.7 | 264.61983 | 25.7 | 321.28493 |
| 25.72 | 313.20605 | 25.72 | 415.53492 | 25.72 | 426.4458 | 25.72 | 262.10543 | 25.72 | 321.23207 |
| 25.74 | 311.47611 | 25.74 | 413.3746 | 25.74 | 423.93441 | 25.74 | 261.94895 | 25.74 | 324.09001 |
| 25.76 | 311.00818 | 25.76 | 411.7026 | 25.76 | 419.72445 | 25.76 | 264.28761 | 25.76 | 322.52787 |
| 25.78 | 308.48417 | 25.78 | 405.49523 | 25.78 | 410.89471 | 25.78 | 266.56381 | 25.78 | 321.17448 |
| 25.8 | 309.55402 | 25.8 | 402.26697 | 25.8 | 406.80705 | 25.8 | 263.902 | 25.8 | 314.69324 |
| 25.82 | 307.08321 | 25.82 | 395.35327 | 25.82 | 407.2965 | 25.82 | 259.81923 | 25.82 | 308.73502 |
| 25.84 | 304.77589 | 25.84 | 392.72752 | 25.84 | 402.03384 | 25.84 | 259.78584 | 25.84 | 305.67114 |
| 25.86 | 302.35322 | 25.86 | 387.0443 | 25.86 | 399.48811 | 25.86 | 259.84285 | 25.86 | 300.98209 |
| 25.88 | 296.56337 | 25.88 | 381.41184 | 25.88 | 391.66593 | 25.88 | 256.78089 | 25.88 | 301.68803 |
| 25.9 | 293.30377 | 25.9 | 376.98685 | 25.9 | 394.29303 | 25.9 | 257.14691 | 25.9 | 299.78993 |
| 25.92 | 292.42267 | 25.92 | 369.40193 | 25.92 | 390.03606 | 25.92 | 259.05766 | 25.92 | 301.51024 |
| 25.94 | 290.65198 | 25.94 | 367.14196 | 25.94 | 389.5706 | 25.94 | 257.92569 | 25.94 | 304.28096 |
| 25.96 | 286.19416 | 25.96 | 364.70966 | 25.96 | 387.8482 | 25.96 | 258.83245 | 25.96 | 306.03694 |
| 25.98 | 283.85 | 25.98 | 362.91083 | 25.98 | 387.43614 | 25.98 | 257.19218 | 25.98 | 311.03988 |
| 26 | 277.51332 | 26 | 358.02149 | 26 | 390.38393 | 26 | 256.78748 | 26 | 315.44935 |
| 26.02 | 271.91974 | 26.02 | 352.88413 | 26.02 | 390.66463 | 26.02 | 259.93741 | 26.02 | 322.7987 |
| 26.04 | 266.71405 | 26.04 | 352.32861 | 26.04 | 395.0947 | 26.04 | 263.64834 | 26.04 | 324.69645 |
| 26.06 | 265.90297 | 26.06 | 350.37463 | 26.06 | 398.70521 | 26.06 | 264.42753 | 26.06 | 331.40875 |
| 26.08 | 260.74978 | 26.08 | 349.32478 | 26.08 | 407.65802 | 26.08 | 267.51007 | 26.08 | 334.4077 |
| 26.1 | 255.81631 | 26.1 | 348.15621 | 26.1 | 414.55529 | 26.1 | 272.69591 | 26.1 | 337.85739 |
| 26.12 | 249.61307 | 26.12 | 358.22607 | 26.12 | 419.83493 | 26.12 | 274.9087 | 26.12 | 339.116 |
| 26.14 | 244.98856 | 26.14 | 364.36381 | 26.14 | 432.10625 | 26.14 | 278.8635 | 26.14 | 340.63206 |
| 26.16 | 243.71843 | 26.16 | 371.06084 | 26.16 | 437.40121 | 26.16 | 280.88677 | 26.16 | 345.48741 |
| 26.18 | 240.37294 | 26.18 | 380.72016 | 26.18 | 441.48419 | 26.18 | 284.04538 | 26.18 | 350.41561 |
| 26.2 | 236.14127 | 26.2 | 385.72632 | 26.2 | 446.9324 | 26.2 | 287.65287 | 26.2 | 357.45012 |
| 26.22 | 236.60241 | 26.22 | 390.88895 | 26.22 | 448.22424 | 26.22 | 294.22154 | 26.22 | 360.3054 |
| 26.24 | 235.4612 | 26.24 | 395.8717 | 26.24 | 449.99908 | 26.24 | 297.82659 | 26.24 | 361.40832 |
| 26.26 | 240.83108 | 26.26 | 400.41956 | 26.26 | 453.26679 | 26.26 | 299.0265 | 26.26 | 365.5983 |
| 26.28 | 245.55919 | 26.28 | 404.92663 | 26.28 | 460.24957 | 26.28 | 299.73583 | 26.28 | 367.65007 |
| 26.3 | 248.07002 | 26.3 | 408.1819 | 26.3 | 464.15961 | 26.3 | 300.16205 | 26.3 | 371.41349 |
| 26.32 | 251.18617 | 26.32 | 411.00569 | 26.32 | 471.10538 | 26.32 | 299.66487 | 26.32 | 373.32406 |
| 26.34 | 259.93232 | 26.34 | 414.55616 | 26.34 | 476.32728 | 26.34 | 306.25446 | 26.34 | 372.68097 |
| 26.36 | 264.98926 | 26.36 | 418.01394 | 26.36 | 475.16416 | 26.36 | 310.67849 | 26.36 | 375.72238 |
| 26.38 | 268.16431 | 26.38 | 421.99252 | 26.38 | 467.738 | 26.38 | 309.44083 | 26.38 | 382.64667 |
| 26.4 | 271.58153 | 26.4 | 425.15529 | 26.4 | 466.88501 | 26.4 | 309.07919 | 26.4 | 380.70644 |
| 26.42 | 274.61065 | 26.42 | 426.19135 | 26.42 | 469.19065 | 26.42 | 309.19451 | 26.42 | 378.19282 |
| 26.44 | 278.02902 | 26.44 | 425.9856 | 26.44 | 468.13248 | 26.44 | 308.79529 | 26.44 | 377.0114 |
| 26.46 | 282.76205 | 26.46 | 426.49582 | 26.46 | 466.01407 | 26.46 | 306.04833 | 26.46 | 375.39774 |
| 26.48 | 283.10691 | 26.48 | 423.63601 | 26.48 | 461.35372 | 26.48 | 307.05627 | 26.48 | 374.76183 |
| 26.5 | 288.07061 | 26.5 | 422.94292 | 26.5 | 460.54848 | 26.5 | 304.89144 | 26.5 | 372.59718 |
| 26.52 | 293.35272 | 26.52 | 423.42875 | 26.52 | 454.84355 | 26.52 | 301.77416 | 26.52 | 368.62823 |
| 26.54 | 295.3894 | 26.54 | 420.89453 | 26.54 | 450.73417 | 26.54 | 299.81581 | 26.54 | 364.3556 |
| 26.56 | 299.45856 | 26.56 | 416.65017 | 26.56 | 449.12523 | 26.56 | 297.65532 | 26.56 | 355.40615 |
| 26.58 | 298.45493 | 26.58 | 412.29578 | 26.58 | 442.84898 | 26.58 | 294.73209 | 26.58 | 348.91469 |
| 26.6 | 294.6519 | 26.6 | 410.66005 | 26.6 | 437.37396 | 26.6 | 289.60362 | 26.6 | 341.62725 |
| 26.62 | 293.66907 | 26.62 | 405.26523 | 26.62 | 429.12822 | 26.62 | 288.06788 | 26.62 | 340.55303 |
| 26.64 | 293.03277 | 26.64 | 402.18835 | 26.64 | 422.65543 | 26.64 | 285.21183 | 26.64 | 334.30449 |
| 26.66 | 291.36249 | 26.66 | 396.28487 | 26.66 | 417.82635 | 26.66 | 281.11132 | 26.66 | 328.72033 |
| 26.68 | 290.06933 | 26.68 | 391.6634 | 26.68 | 410.19425 | 26.68 | 275.99963 | 26.68 | 324.42842 |
| 26.7 | 288.36111 | 26.7 | 387.39924 | 26.7 | 401.85376 | 26.7 | 270.59842 | 26.7 | 319.36678 |
| 26.72 | 288.0523 | 26.72 | 383.41313 | 26.72 | 394.69334 | 26.72 | 267.07796 | 26.72 | 313.71698 |
| 26.74 | 291.25243 | 26.74 | 376.88221 | 26.74 | 386.33039 | 26.74 | 265.03939 | 26.74 | 306.42312 |
| 26.76 | 289.72824 | 26.76 | 367.8641 | 26.76 | 378.56561 | 26.76 | 258.24911 | 26.76 | 295.97591 |
| 26.78 | 286.63548 | 26.78 | 359.59627 | 26.78 | 370.60243 | 26.78 | 249.29516 | 26.78 | 287.00175 |
| 26.8 | 284.34759 | 26.8 | 351.86243 | 26.8 | 368.09841 | 26.8 | 240.87612 | 26.8 | 278.5465 |
| 26.82 | 279.14796 | 26.82 | 343.37338 | 26.82 | 362.8299 | 26.82 | 233.98923 | 26.82 | 274.58433 |
| 26.84 | 277.19984 | 26.84 | 337.31493 | 26.84 | 352.51635 | 26.84 | 231.53561 | 26.84 | 270.56742 |
| 26.86 | 273.16464 | 26.86 | 326.31033 | 26.86 | 347.69347 | 26.86 | 226.71386 | 26.86 | 265.63318 |
| 26.88 | 268.89803 | 26.88 | 318.2792 | 26.88 | 342.65542 | 26.88 | 219.0321 | 26.88 | 263.14579 |
| 26.9 | 268.059 | 26.9 | 309.99212 | 26.9 | 339.27012 | 26.9 | 218.05812 | 26.9 | 257.24983 |
| 26.92 | 262.98566 | 26.92 | 303.01292 | 26.92 | 331.00322 | 26.92 | 215.02973 | 26.92 | 254.92775 |
| 26.94 | 257.61028 | 26.94 | 297.56244 | 26.94 | 324.37263 | 26.94 | 208.10508 | 26.94 | 254.90189 |
| 26.96 | 253.64548 | 26.96 | 288.10055 | 26.96 | 320.90537 | 26.96 | 205.54067 | 26.96 | 254.20576 |
| 26.98 | 250.07762 | 26.98 | 283.61423 | 26.98 | 321.81933 | 26.98 | 204.78755 | 26.98 | 253.40241 |
| 27 | 246.96051 | 27 | 282.60986 | 27 | 321.36633 | 27 | 207.234 | 27 | 253.04924 |
| 27.02 | 245.06766 | 27.02 | 280.3752 | 27.02 | 317.53707 | 27.02 | 207.73686 | 27.02 | 252.86389 |
| 27.04 | 243.67823 | 27.04 | 279.95995 | 27.04 | 319.63751 | 27.04 | 208.0115 | 27.04 | 252.88033 |
| 27.06 | 241.04284 | 27.06 | 280.97678 | 27.06 | 320.11751 | 27.06 | 204.97067 | 27.06 | 252.27217 |
| 27.08 | 236.66581 | 27.08 | 286.74607 | 27.08 | 321.53844 | 27.08 | 206.18815 | 27.08 | 248.72925 |
| 27.1 | 236.13579 | 27.1 | 294.64092 | 27.1 | 321.49277 | 27.1 | 206.74196 | 27.1 | 247.3944 |
| 27.12 | 235.78885 | 27.12 | 299.69368 | 27.12 | 320.88365 | 27.12 | 207.69217 | 27.12 | 248.8229 |
| 27.14 | 237.84741 | 27.14 | 300.47494 | 27.14 | 321.98488 | 27.14 | 207.16497 | 27.14 | 249.20834 |
| 27.16 | 239.5043 | 27.16 | 304.66378 | 27.16 | 315.46397 | 27.16 | 209.35226 | 27.16 | 248.25514 |
| 27.18 | 238.43876 | 27.18 | 305.36444 | 27.18 | 311.28438 | 27.18 | 211.78874 | 27.18 | 249.52434 |
| 27.2 | 237.89232 | 27.2 | 301.48026 | 27.2 | 309.04461 | 27.2 | 210.45522 | 27.2 | 248.39165 |
| 27.22 | 237.77677 | 27.22 | 303.09844 | 27.22 | 310.16166 | 27.22 | 211.59493 | 27.22 | 247.37315 |
| 27.24 | 238.55123 | 27.24 | 301.1841 | 27.24 | 309.40097 | 27.24 | 212.71576 | 27.24 | 246.2544 |
| 27.26 | 241.46636 | 27.26 | 302.43931 | 27.26 | 308.73901 | 27.26 | 215.05897 | 27.26 | 245.48503 |
| 27.28 | 242.97036 | 27.28 | 300.87229 | 27.28 | 307.31374 | 27.28 | 214.13519 | 27.28 | 243.59636 |
| 27.3 | 246.40797 | 27.3 | 299.22976 | 27.3 | 304.05222 | 27.3 | 215.54237 | 27.3 | 245.06337 |
| 27.32 | 249.46579 | 27.32 | 298.35694 | 27.32 | 306.26934 | 27.32 | 216.84817 | 27.32 | 244.30325 |
| 27.34 | 250.77348 | 27.34 | 298.06171 | 27.34 | 302.51425 | 27.34 | 218.72419 | 27.34 | 244.22605 |
| 27.36 | 247.98198 | 27.36 | 296.12754 | 27.36 | 297.52773 | 27.36 | 218.38068 | 27.36 | 242.42005 |
| 27.38 | 244.56702 | 27.38 | 294.98426 | 27.38 | 297.38278 | 27.38 | 218.86766 | 27.38 | 244.38875 |
| 27.4 | 242.67759 | 27.4 | 292.98724 | 27.4 | 299.38074 | 27.4 | 216.71111 | 27.4 | 243.82362 |
| 27.42 | 241.49389 | 27.42 | 291.19803 | 27.42 | 301.77414 | 27.42 | 217.51632 | 27.42 | 243.04256 |
| 27.44 | 242.44218 | 27.44 | 289.86977 | 27.44 | 300.71351 | 27.44 | 218.03312 | 27.44 | 241.99044 |
| 27.46 | 241.06256 | 27.46 | 290.60989 | 27.46 | 300.38884 | 27.46 | 217.22543 | 27.46 | 241.57575 |
| 27.48 | 239.96174 | 27.48 | 293.49783 | 27.48 | 301.89002 | 27.48 | 219.50502 | 27.48 | 241.70786 |
| 27.5 | 242.39743 | 27.5 | 296.45843 | 27.5 | 300.81278 | 27.5 | 216.71352 | 27.5 | 239.46243 |
| 27.52 | 236.81746 | 27.52 | 299.73255 | 27.52 | 298.68721 | 27.52 | 217.95346 | 27.52 | 236.57449 |
| 27.54 | 231.36131 | 27.54 | 300.89133 | 27.54 | 296.88065 | 27.54 | 221.50601 | 27.54 | 236.45106 |
| 27.56 | 229.02754 | 27.56 | 300.08666 | 27.56 | 297.72589 | 27.56 | 223.34825 | 27.56 | 235.79381 |
| 27.58 | 224.80095 | 27.58 | 302.0786 | 27.58 | 294.89986 | 27.58 | 223.55643 | 27.58 | 238.50623 |
| 27.6 | 226.4267 | 27.6 | 303.41894 | 27.6 | 292.26709 | 27.6 | 222.82216 | 27.6 | 237.51468 |
| 27.62 | 224.00876 | 27.62 | 304.86255 | 27.62 | 289.97561 | 27.62 | 225.31332 | 27.62 | 240.28162 |
| 27.64 | 227.08922 | 27.64 | 305.87352 | 27.64 | 293.38206 | 27.64 | 224.22271 | 27.64 | 240.85353 |
| 27.66 | 229.12704 | 27.66 | 307.05153 | 27.66 | 296.50785 | 27.66 | 223.59755 | 27.66 | 241.07435 |
| 27.68 | 229.56401 | 27.68 | 311.4969 | 27.68 | 296.05293 | 27.68 | 222.02596 | 27.68 | 239.41823 |
| 27.7 | 229.10365 | 27.7 | 311.42402 | 27.7 | 298.50126 | 27.7 | 221.55181 | 27.7 | 233.94641 |
| 27.72 | 226.45486 | 27.72 | 309.90796 | 27.72 | 302.01078 | 27.72 | 219.08366 | 27.72 | 230.71096 |
| 27.74 | 224.98975 | 27.74 | 308.10289 | 27.74 | 300.94299 | 27.74 | 218.74992 | 27.74 | 226.60457 |
| 27.76 | 223.36346 | 27.76 | 302.65487 | 27.76 | 300.32179 | 27.76 | 215.88482 | 27.76 | 224.91878 |
| 27.78 | 222.17185 | 27.78 | 302.40607 | 27.78 | 300.11566 | 27.78 | 212.95025 | 27.78 | 222.17843 |
| 27.8 | 221.35059 | 27.8 | 300.07532 | 27.8 | 299.13318 | 27.8 | 212.35433 | 27.8 | 222.84738 |
| 27.82 | 219.45908 | 27.82 | 300.5978 | 27.82 | 293.64061 | 27.82 | 214.34588 | 27.82 | 220.02585 |
| 27.84 | 219.33171 | 27.84 | 296.64604 | 27.84 | 294.04378 | 27.84 | 215.63714 | 27.84 | 219.24855 |
| 27.86 | 217.23522 | 27.86 | 293.92099 | 27.86 | 291.43988 | 27.86 | 213.4123 | 27.86 | 220.23347 |
| 27.88 | 217.38207 | 27.88 | 292.14859 | 27.88 | 294.34084 | 27.88 | 211.26673 | 27.88 | 220.58493 |
| 27.9 | 217.45135 | 27.9 | 291.62818 | 27.9 | 292.25829 | 27.9 | 212.98968 | 27.9 | 223.18446 |
| 27.92 | 217.17691 | 27.92 | 288.11037 | 27.92 | 294.7976 | 27.92 | 214.55616 | 27.92 | 239.49305 |
| 27.94 | 217.36038 | 27.94 | 287.39971 | 27.94 | 295.15225 | 27.94 | 217.93488 | 27.94 | 255.20575 |
| 27.96 | 217.26224 | 27.96 | 286.91121 | 27.96 | 301.32944 | 27.96 | 223.95577 | 27.96 | 270.81502 |
| 27.98 | 216.78639 | 27.98 | 286.881 | 27.98 | 306.86809 | 27.98 | 231.747 | 27.98 | 288.99794 |
| 28 | 217.05969 | 28 | 286.28719 | 28 | 311.82555 | 28 | 235.11966 | 28 | 307.89606 |
| 28.02 | 215.15422 | 28.02 | 285.47648 | 28.02 | 316.16333 | 28.02 | 241.74232 | 28.02 | 328.91052 |
| 28.04 | 212.3818 | 28.04 | 288.18455 | 28.04 | 322.24671 | 28.04 | 253.65443 | 28.04 | 349.18071 |
| 28.06 | 210.71451 | 28.06 | 288.83876 | 28.06 | 331.06949 | 28.06 | 260.30785 | 28.06 | 366.87137 |
| 28.08 | 208.21596 | 28.08 | 295.14277 | 28.08 | 342.15638 | 28.08 | 269.34241 | 28.08 | 384.24644 |
| 28.1 | 208.68407 | 28.1 | 303.10934 | 28.1 | 355.2809 | 28.1 | 278.90416 | 28.1 | 400.98937 |
| 28.12 | 204.84346 | 28.12 | 307.15361 | 28.12 | 368.41144 | 28.12 | 289.50897 | 28.12 | 417.35517 |
| 28.14 | 204.68943 | 28.14 | 313.27984 | 28.14 | 380.33056 | 28.14 | 297.92121 | 28.14 | 432.62921 |
| 28.16 | 199.24649 | 28.16 | 320.47762 | 28.16 | 391.57223 | 28.16 | 305.75586 | 28.16 | 447.86379 |
| 28.18 | 195.63316 | 28.18 | 323.02148 | 28.18 | 406.18374 | 28.18 | 312.2264 | 28.18 | 460.79293 |
| 28.2 | 193.50552 | 28.2 | 326.98441 | 28.2 | 416.22231 | 28.2 | 320.9231 | 28.2 | 472.94609 |
| 28.22 | 192.26084 | 28.22 | 334.26638 | 28.22 | 427.97552 | 28.22 | 330.45351 | 28.22 | 483.73683 |
| 28.24 | 191.09886 | 28.24 | 341.32488 | 28.24 | 436.42211 | 28.24 | 337.72151 | 28.24 | 491.36552 |
| 28.26 | 191.0207 | 28.26 | 345.79592 | 28.26 | 445.48746 | 28.26 | 340.98092 | 28.26 | 499.31739 |
| 28.28 | 191.56581 | 28.28 | 351.09843 | 28.28 | 453.9584 | 28.28 | 343.30618 | 28.28 | 504.10536 |
| 28.3 | 188.48516 | 28.3 | 355.13286 | 28.3 | 459.77599 | 28.3 | 345.42817 | 28.3 | 509.92863 |
| 28.32 | 186.235 | 28.32 | 359.03534 | 28.32 | 469.01159 | 28.32 | 348.38295 | 28.32 | 510.17948 |
| 28.34 | 182.77701 | 28.34 | 361.92744 | 28.34 | 473.86636 | 28.34 | 349.94904 | 28.34 | 512.24786 |
| 28.36 | 180.12764 | 28.36 | 369.98802 | 28.36 | 479.60886 | 28.36 | 350.40979 | 28.36 | 512.67616 |
| 28.38 | 179.88564 | 28.38 | 371.94447 | 28.38 | 485.27 | 28.38 | 350.12419 | 28.38 | 514.53935 |
| 28.4 | 179.95208 | 28.4 | 376.04724 | 28.4 | 486.93576 | 28.4 | 348.54657 | 28.4 | 509.07699 |
| 28.42 | 180.90057 | 28.42 | 379.19076 | 28.42 | 488.52411 | 28.42 | 345.8051 | 28.42 | 501.79201 |
| 28.44 | 180.94624 | 28.44 | 383.85244 | 28.44 | 485.36434 | 28.44 | 342.17044 | 28.44 | 494.98157 |
| 28.46 | 176.76345 | 28.46 | 386.96744 | 28.46 | 482.05887 | 28.46 | 339.7442 | 28.46 | 489.30969 |
| 28.48 | 174.83607 | 28.48 | 388.4346 | 28.48 | 479.55994 | 28.48 | 337.07088 | 28.48 | 482.58814 |
| 28.5 | 172.58555 | 28.5 | 387.48817 | 28.5 | 475.73801 | 28.5 | 334.02871 | 28.5 | 472.90635 |
| 28.52 | 168.37633 | 28.52 | 387.0344 | 28.52 | 470.15297 | 28.52 | 329.88009 | 28.52 | 463.13244 |
| 28.54 | 168.64418 | 28.54 | 383.68815 | 28.54 | 464.57168 | 28.54 | 321.24927 | 28.54 | 449.35484 |
| 28.56 | 168.18438 | 28.56 | 380.20374 | 28.56 | 462.13184 | 28.56 | 311.04196 | 28.56 | 433.90469 |
| 28.58 | 166.58864 | 28.58 | 377.58401 | 28.58 | 455.03483 | 28.58 | 302.46758 | 28.58 | 417.9051 |
| 28.6 | 167.38102 | 28.6 | 374.4603 | 28.6 | 443.41641 | 28.6 | 293.85416 | 28.6 | 398.96449 |
| 28.62 | 166.80589 | 28.62 | 368.14288 | 28.62 | 436.97611 | 28.62 | 284.80036 | 28.62 | 382.25384 |
| 28.64 | 171.14028 | 28.64 | 360.41864 | 28.64 | 429.13259 | 28.64 | 273.6731 | 28.64 | 361.38248 |
| 28.66 | 169.84243 | 28.66 | 356.95746 | 28.66 | 417.98793 | 28.66 | 266.87698 | 28.66 | 336.565 |
| 28.68 | 166.78026 | 28.68 | 350.75024 | 28.68 | 405.40874 | 28.68 | 256.3639 | 28.68 | 313.94841 |
| 28.7 | 166.85956 | 28.7 | 340.34099 | 28.7 | 391.47505 | 28.7 | 246.41332 | 28.7 | 291.30236 |
| 28.72 | 167.0115 | 28.72 | 331.49575 | 28.72 | 374.88503 | 28.72 | 235.36098 | 28.72 | 275.05831 |
| 28.74 | 168.81806 | 28.74 | 325.27307 | 28.74 | 354.95819 | 28.74 | 224.01794 | 28.74 | 257.09132 |
| 28.76 | 166.88714 | 28.76 | 314.69204 | 28.76 | 343.80524 | 28.76 | 211.7485 | 28.76 | 239.89465 |
| 28.78 | 168.12781 | 28.78 | 307.8429 | 28.78 | 329.10068 | 28.78 | 201.03763 | 28.78 | 225.54891 |
| 28.8 | 166.15819 | 28.8 | 298.3644 | 28.8 | 317.20534 | 28.8 | 194.22832 | 28.8 | 217.30978 |
| 28.82 | 166.97004 | 28.82 | 290.16206 | 28.82 | 303.64936 | 28.82 | 185.10449 | 28.82 | 205.80593 |
| 28.84 | 168.38441 | 28.84 | 280.73698 | 28.84 | 297.40779 | 28.84 | 176.18074 | 28.84 | 201.67483 |
| 28.86 | 169.0845 | 28.86 | 272.27264 | 28.86 | 287.52475 | 28.86 | 168.46595 | 28.86 | 195.30002 |
| 28.88 | 166.96517 | 28.88 | 260.99813 | 28.88 | 282.31853 | 28.88 | 162.51299 | 28.88 | 191.16968 |
| 28.9 | 168.09016 | 28.9 | 255.19014 | 28.9 | 272.74262 | 28.9 | 159.4225 | 28.9 | 193.81131 |
| 28.92 | 167.1041 | 28.92 | 248.73155 | 28.92 | 268.17136 | 28.92 | 158.1839 | 28.92 | 199.57418 |
| 28.94 | 166.85569 | 28.94 | 242.46527 | 28.94 | 262.70143 | 28.94 | 156.3711 | 28.94 | 201.36775 |
| 28.96 | 168.37536 | 28.96 | 237.77265 | 28.96 | 259.70892 | 28.96 | 155.45204 | 28.96 | 203.17074 |
| 28.98 | 165.34414 | 28.98 | 235.07611 | 28.98 | 257.63981 | 28.98 | 155.53342 | 28.98 | 204.67605 |
| 29 | 165.29073 | 29 | 233.22426 | 29 | 256.00688 | 29 | 154.75346 | 29 | 206.78029 |
| 29.02 | 164.60176 | 29.02 | 236.23791 | 29.02 | 252.93548 | 29.02 | 154.72817 | 29.02 | 206.09191 |
| 29.04 | 163.68234 | 29.04 | 236.42685 | 29.04 | 255.60957 | 29.04 | 156.25934 | 29.04 | 202.68376 |
| 29.06 | 160.02048 | 29.06 | 237.78628 | 29.06 | 262.15879 | 29.06 | 153.64943 | 29.06 | 197.4126 |
| 29.08 | 148.21086 | 29.08 | 241.09062 | 29.08 | 266.21739 | 29.08 | 157.75938 | 29.08 | 196.32593 |
| 29.1 | 138.56548 | 29.1 | 239.37429 | 29.1 | 266.34159 | 29.1 | 159.26491 | 29.1 | 195.81121 |
| 29.12 | 136.36667 | 29.12 | 236.33724 | 29.12 | 267.91146 | 29.12 | 159.72056 | 29.12 | 196.43316 |
| 29.14 | 139.58456 | 29.14 | 237.8939 | 29.14 | 266.66549 | 29.14 | 161.04487 | 29.14 | 197.85372 |
| 29.16 | 136.37687 | 29.16 | 233.94459 | 29.16 | 268.17799 | 29.16 | 160.65376 | 29.16 | 197.52775 |
| 29.18 | 143.44062 | 29.18 | 231.67238 | 29.18 | 268.55702 | 29.18 | 162.33444 | 29.18 | 196.85031 |
| 29.2 | 154.59941 | 29.2 | 230.76278 | 29.2 | 263.49464 | 29.2 | 161.80082 | 29.2 | 198.07116 |
| 29.22 | 167.37167 | 29.22 | 232.7515 | 29.22 | 266.6914 | 29.22 | 162.2825 | 29.22 | 196.67117 |
| 29.24 | 179.5022 | 29.24 | 234.42744 | 29.24 | 265.24838 | 29.24 | 159.84662 | 29.24 | 196.22626 |
| 29.26 | 194.04162 | 29.26 | 231.41774 | 29.26 | 264.41539 | 29.26 | 160.87139 | 29.26 | 195.0426 |
| 29.28 | 205.77539 | 29.28 | 232.17464 | 29.28 | 261.88024 | 29.28 | 161.72719 | 29.28 | 194.47823 |
| 29.3 | 213.67874 | 29.3 | 231.40037 | 29.3 | 262.74492 | 29.3 | 161.45614 | 29.3 | 194.22434 |
| 29.32 | 223.19575 | 29.32 | 229.46695 | 29.32 | 264.93751 | 29.32 | 163.77103 | 29.32 | 194.46424 |
| 29.34 | 231.45152 | 29.34 | 232.39946 | 29.34 | 263.90558 | 29.34 | 164.24138 | 29.34 | 197.12946 |
| 29.36 | 242.01253 | 29.36 | 232.13276 | 29.36 | 263.99654 | 29.36 | 165.50528 | 29.36 | 195.01144 |
| 29.38 | 247.21875 | 29.38 | 232.24091 | 29.38 | 262.136 | 29.38 | 166.36789 | 29.38 | 194.25527 |
| 29.4 | 253.78912 | 29.4 | 236.05922 | 29.4 | 263.33856 | 29.4 | 165.85448 | 29.4 | 195.55448 |
| 29.42 | 260.4193 | 29.42 | 234.14824 | 29.42 | 261.85493 | 29.42 | 163.64679 | 29.42 | 198.8947 |
| 29.44 | 263.204 | 29.44 | 236.12015 | 29.44 | 261.66051 | 29.44 | 162.62716 | 29.44 | 202.16393 |
| 29.46 | 265.51701 | 29.46 | 232.86997 | 29.46 | 265.21571 | 29.46 | 165.1746 | 29.46 | 202.43797 |
| 29.48 | 270.08676 | 29.48 | 229.81232 | 29.48 | 267.42472 | 29.48 | 164.89412 | 29.48 | 201.76656 |
| 29.5 | 275.11878 | 29.5 | 230.81878 | 29.5 | 269.21997 | 29.5 | 163.27874 | 29.5 | 198.82481 |
| 29.52 | 279.49202 | 29.52 | 230.91486 | 29.52 | 270.30532 | 29.52 | 163.3435 | 29.52 | 196.40195 |
| 29.54 | 281.68968 | 29.54 | 228.92068 | 29.54 | 268.5667 | 29.54 | 164.12983 | 29.54 | 194.5829 |
| 29.56 | 282.86598 | 29.56 | 230.06586 | 29.56 | 268.04441 | 29.56 | 168.86228 | 29.56 | 193.30503 |
| 29.58 | 285.84209 | 29.58 | 229.96428 | 29.58 | 262.14507 | 29.58 | 168.27149 | 29.58 | 193.28239 |
| 29.6 | 290.33161 | 29.6 | 230.01845 | 29.6 | 255.7629 | 29.6 | 170.76156 | 29.6 | 192.31537 |
| 29.62 | 288.50823 | 29.62 | 229.51806 | 29.62 | 256.21741 | 29.62 | 170.61449 | 29.62 | 191.31441 |
| 29.64 | 287.1273 | 29.64 | 230.3814 | 29.64 | 255.58339 | 29.64 | 171.39309 | 29.64 | 190.10942 |
| 29.66 | 286.18824 | 29.66 | 232.31652 | 29.66 | 256.18929 | 29.66 | 173.27118 | 29.66 | 190.94069 |
| 29.68 | 285.29523 | 29.68 | 231.92145 | 29.68 | 256.11625 | 29.68 | 171.41496 | 29.68 | 193.50702 |
| 29.7 | 283.36465 | 29.7 | 231.45842 | 29.7 | 254.41502 | 29.7 | 170.5063 | 29.7 | 191.8373 |
| 29.72 | 279.68619 | 29.72 | 231.36571 | 29.72 | 257.23616 | 29.72 | 170.53765 | 29.72 | 191.18743 |
| 29.74 | 276.5221 | 29.74 | 231.24566 | 29.74 | 260.75058 | 29.74 | 169.89021 | 29.74 | 192.30467 |
| 29.76 | 271.14562 | 29.76 | 228.58779 | 29.76 | 268.10955 | 29.76 | 167.61723 | 29.76 | 193.04514 |
| 29.78 | 267.40826 | 29.78 | 228.88055 | 29.78 | 270.83686 | 29.78 | 166.1846 | 29.78 | 193.85715 |
| 29.8 | 259.4145 | 29.8 | 231.53743 | 29.8 | 270.17567 | 29.8 | 164.72439 | 29.8 | 191.94583 |
| 29.82 | 253.19483 | 29.82 | 231.51404 | 29.82 | 269.51521 | 29.82 | 164.41273 | 29.82 | 190.26307 |
| 29.84 | 245.12897 | 29.84 | 232.22735 | 29.84 | 269.63808 | 29.84 | 165.73985 | 29.84 | 188.90648 |
| 29.86 | 238.31133 | 29.86 | 231.15766 | 29.86 | 273.55737 | 29.86 | 162.86019 | 29.86 | 188.19055 |
| 29.88 | 229.88758 | 29.88 | 233.17393 | 29.88 | 277.98329 | 29.88 | 162.17954 | 29.88 | 188.31155 |
| 29.9 | 221.61712 | 29.9 | 236.44544 | 29.9 | 279.75643 | 29.9 | 161.96834 | 29.9 | 188.53732 |
| 29.92 | 213.30548 | 29.92 | 234.9254 | 29.92 | 282.24195 | 29.92 | 164.26361 | 29.92 | 189.14926 |
| 29.94 | 205.47612 | 29.94 | 234.37952 | 29.94 | 281.90465 | 29.94 | 164.63678 | 29.94 | 186.49407 |
| 29.96 | 196.83795 | 29.96 | 235.1504 | 29.96 | 282.39786 | 29.96 | 166.42126 | 29.96 | 186.03031 |
| 29.98 | 186.98777 | 29.98 | 235.768 | 29.98 | 285.6567 | 29.98 | 166.48901 | 29.98 | 184.9663 |
| 30 | 179.4946 | 30 | 236.47827 | 30 | 286.97176 | 30 | 166.91218 | 30 | 183.24881 |
| 30.02 | 168.40789 | 30.02 | 235.15416 | 30.02 | 290.13905 | 30.02 | 165.58051 | 30.02 | 178.11979 |
| 30.04 | 157.06486 | 30.04 | 232.2209 | 30.04 | 292.71707 | 30.04 | 168.2733 | 30.04 | 177.25415 |
| 30.06 | 146.06517 | 30.06 | 231.73149 | 30.06 | 294.38396 | 30.06 | 169.41526 | 30.06 | 176.54896 |
| 30.08 | 137.84793 | 30.08 | 228.57494 | 30.08 | 293.70426 | 30.08 | 168.26309 | 30.08 | 176.88891 |
| 30.1 | 141.84766 | 30.1 | 223.97046 | 30.1 | 290.59849 | 30.1 | 165.53275 | 30.1 | 178.01523 |
| 30.12 | 150.26273 | 30.12 | 223.41026 | 30.12 | 290.60699 | 30.12 | 163.62706 | 30.12 | 178.03163 |
| 30.14 | 152.85792 | 30.14 | 221.71655 | 30.14 | 290.00581 | 30.14 | 163.76899 | 30.14 | 179.18039 |
| 30.16 | 155.41141 | 30.16 | 219.11513 | 30.16 | 288.90066 | 30.16 | 162.2865 | 30.16 | 179.53393 |
| 30.18 | 163.56147 | 30.18 | 222.61712 | 30.18 | 285.09989 | 30.18 | 162.57794 | 30.18 | 179.04978 |
| 30.2 | 168.6188 | 30.2 | 223.13828 | 30.2 | 283.64951 | 30.2 | 162.66252 | 30.2 | 178.23869 |
| 30.22 | 170.0694 | 30.22 | 223.4299 | 30.22 | 281.64568 | 30.22 | 161.71554 | 30.22 | 179.0947 |
| 30.24 | 169.05279 | 30.24 | 217.94281 | 30.24 | 279.87686 | 30.24 | 159.47258 | 30.24 | 178.11583 |
| 30.26 | 168.72283 | 30.26 | 216.47168 | 30.26 | 278.18749 | 30.26 | 161.5147 | 30.26 | 176.03294 |
| 30.28 | 168.74642 | 30.28 | 214.09753 | 30.28 | 277.25297 | 30.28 | 159.6768 | 30.28 | 175.06424 |
| 30.3 | 166.18048 | 30.3 | 213.6415 | 30.3 | 277.40849 | 30.3 | 157.96934 | 30.3 | 175.03215 |
| 30.32 | 167.70338 | 30.32 | 212.90216 | 30.32 | 276.31636 | 30.32 | 157.39327 | 30.32 | 173.96832 |
| 30.34 | 166.22844 | 30.34 | 212.81042 | 30.34 | 273.46408 | 30.34 | 156.11164 | 30.34 | 174.71768 |
| 30.36 | 164.88392 | 30.36 | 208.45302 | 30.36 | 270.03593 | 30.36 | 153.04402 | 30.36 | 175.1488 |
| 30.38 | 159.46687 | 30.38 | 209.94285 | 30.38 | 266.69271 | 30.38 | 150.51187 | 30.38 | 177.29492 |
| 30.4 | 158.827 | 30.4 | 208.83335 | 30.4 | 266.12248 | 30.4 | 148.13941 | 30.4 | 180.13324 |
| 30.42 | 158.46743 | 30.42 | 207.54189 | 30.42 | 262.01347 | 30.42 | 147.34722 | 30.42 | 177.62752 |
| 30.44 | 158.33078 | 30.44 | 205.86142 | 30.44 | 259.75107 | 30.44 | 145.99879 | 30.44 | 179.71683 |
| 30.46 | 157.0965 | 30.46 | 203.58298 | 30.46 | 256.05205 | 30.46 | 147.55924 | 30.46 | 179.18264 |
| 30.48 | 157.91153 | 30.48 | 202.71168 | 30.48 | 251.83945 | 30.48 | 145.28778 | 30.48 | 179.67133 |
| 30.5 | 160.45405 | 30.5 | 204.21909 | 30.5 | 247.03942 | 30.5 | 146.09547 | 30.5 | 180.78516 |
| 30.52 | 159.09879 | 30.52 | 204.68267 | 30.52 | 243.20583 | 30.52 | 148.31977 | 30.52 | 183.26953 |
| 30.54 | 157.43473 | 30.54 | 206.82693 | 30.54 | 237.62831 | 30.54 | 146.71856 | 30.54 | 183.02718 |
| 30.56 | 154.05055 | 30.56 | 207.70746 | 30.56 | 234.67864 | 30.56 | 147.88659 | 30.56 | 183.36941 |
| 30.58 | 152.96216 | 30.58 | 209.35018 | 30.58 | 231.00361 | 30.58 | 146.88071 | 30.58 | 184.48494 |
| 30.6 | 153.6864 | 30.6 | 209.02102 | 30.6 | 229.22687 | 30.6 | 146.89599 | 30.6 | 184.75314 |
| 30.62 | 152.28112 | 30.62 | 210.89913 | 30.62 | 231.24183 | 30.62 | 146.88201 | 30.62 | 185.62407 |
| 30.64 | 154.86252 | 30.64 | 211.33684 | 30.64 | 228.66214 | 30.64 | 147.64176 | 30.64 | 187.19206 |
| 30.66 | 155.72967 | 30.66 | 212.0881 | 30.66 | 229.18367 | 30.66 | 145.27609 | 30.66 | 188.52485 |
| 30.68 | 151.85077 | 30.68 | 210.8944 | 30.68 | 229.40661 | 30.68 | 143.88989 | 30.68 | 190.194 |
| 30.7 | 151.08027 | 30.7 | 210.79699 | 30.7 | 225.8684 | 30.7 | 142.6747 | 30.7 | 187.23621 |
| 30.72 | 151.80319 | 30.72 | 210.36589 | 30.72 | 225.35121 | 30.72 | 141.8268 | 30.72 | 188.1811 |
| 30.74 | 151.00833 | 30.74 | 212.74932 | 30.74 | 221.5544 | 30.74 | 138.39938 | 30.74 | 189.60469 |
| 30.76 | 149.46544 | 30.76 | 215.70333 | 30.76 | 221.86056 | 30.76 | 135.77381 | 30.76 | 189.20549 |
| 30.78 | 149.31859 | 30.78 | 218.85101 | 30.78 | 220.21347 | 30.78 | 137.84783 | 30.78 | 188.74983 |
| 30.8 | 146.83684 | 30.8 | 222.65705 | 30.8 | 214.68181 | 30.8 | 139.72515 | 30.8 | 189.3293 |
| 30.82 | 147.30176 | 30.82 | 220.38445 | 30.82 | 216.43703 | 30.82 | 142.04437 | 30.82 | 191.89862 |
| 30.84 | 148.48999 | 30.84 | 223.01398 | 30.84 | 215.75882 | 30.84 | 141.28728 | 30.84 | 191.28007 |
| 30.86 | 149.43623 | 30.86 | 224.83527 | 30.86 | 220.03089 | 30.86 | 141.56247 | 30.86 | 191.87052 |
| 30.88 | 149.20086 | 30.88 | 223.05722 | 30.88 | 218.72225 | 30.88 | 142.08399 | 30.88 | 192.21932 |
| 30.9 | 148.91811 | 30.9 | 222.09911 | 30.9 | 216.24805 | 30.9 | 141.92147 | 30.9 | 194.32056 |
| 30.92 | 151.64051 | 30.92 | 219.67248 | 30.92 | 216.97382 | 30.92 | 142.77121 | 30.92 | 194.12502 |
| 30.94 | 151.69091 | 30.94 | 219.54752 | 30.94 | 216.79846 | 30.94 | 143.20891 | 30.94 | 194.45761 |
| 30.96 | 150.32735 | 30.96 | 216.5684 | 30.96 | 218.62825 | 30.96 | 141.53444 | 30.96 | 197.06847 |
| 30.98 | 148.52644 | 30.98 | 217.95689 | 30.98 | 220.19361 | 30.98 | 141.42306 | 30.98 | 194.50271 |
| 31 | 146.00675 | 31 | 216.32304 | 31 | 221.5872 | 31 | 139.67217 | 31 | 192.67971 |
| 31.02 | 145.43367 | 31.02 | 212.87111 | 31.02 | 223.58629 | 31.02 | 139.80183 | 31.02 | 191.39051 |
| 31.04 | 143.72714 | 31.04 | 214.82283 | 31.04 | 223.70315 | 31.04 | 141.18862 | 31.04 | 191.51223 |
| 31.06 | 142.13009 | 31.06 | 211.99849 | 31.06 | 223.46966 | 31.06 | 141.72352 | 31.06 | 191.48186 |
| 31.08 | 143.24678 | 31.08 | 209.63151 | 31.08 | 221.14514 | 31.08 | 140.44998 | 31.08 | 191.68401 |
| 31.1 | 141.7424 | 31.1 | 209.59392 | 31.1 | 219.10298 | 31.1 | 141.08818 | 31.1 | 192.81464 |
| 31.12 | 139.4207 | 31.12 | 209.33912 | 31.12 | 219.81477 | 31.12 | 141.37206 | 31.12 | 192.16211 |
| 31.14 | 138.89711 | 31.14 | 204.79409 | 31.14 | 218.81493 | 31.14 | 141.17406 | 31.14 | 190.84197 |
| 31.16 | 137.52978 | 31.16 | 203.67082 | 31.16 | 216.30297 | 31.16 | 140.13893 | 31.16 | 189.44445 |
| 31.18 | 139.31598 | 31.18 | 203.98982 | 31.18 | 217.08837 | 31.18 | 139.97735 | 31.18 | 188.61865 |
| 31.2 | 142.10049 | 31.2 | 198.64012 | 31.2 | 219.28095 | 31.2 | 141.54724 | 31.2 | 187.16787 |
| 31.22 | 143.21415 | 31.22 | 195.20232 | 31.22 | 217.81754 | 31.22 | 141.40776 | 31.22 | 185.53287 |
| 31.24 | 145.73516 | 31.24 | 191.35473 | 31.24 | 222.09019 | 31.24 | 143.68055 | 31.24 | 181.65471 |
| 31.26 | 145.70872 | 31.26 | 191.87417 | 31.26 | 223.10721 | 31.26 | 146.80446 | 31.26 | 178.94796 |
| 31.28 | 146.4443 | 31.28 | 191.30354 | 31.28 | 225.29375 | 31.28 | 146.27331 | 31.28 | 177.16119 |
| 31.3 | 145.80481 | 31.3 | 190.71781 | 31.3 | 224.42133 | 31.3 | 148.87247 | 31.3 | 176.86088 |
| 31.32 | 146.82391 | 31.32 | 188.40254 | 31.32 | 221.76858 | 31.32 | 149.03404 | 31.32 | 174.00162 |
| 31.34 | 146.37334 | 31.34 | 185.68766 | 31.34 | 218.87101 | 31.34 | 150.22322 | 31.34 | 175.91087 |
| 31.36 | 146.63024 | 31.36 | 187.5365 | 31.36 | 215.52478 | 31.36 | 149.2268 | 31.36 | 177.21477 |
| 31.38 | 146.74729 | 31.38 | 188.43872 | 31.38 | 215.25564 | 31.38 | 151.72024 | 31.38 | 176.39482 |
| 31.4 | 150.20771 | 31.4 | 188.58707 | 31.4 | 216.59487 | 31.4 | 153.07175 | 31.4 | 175.32364 |
| 31.42 | 151.26606 | 31.42 | 189.13219 | 31.42 | 212.99042 | 31.42 | 153.33885 | 31.42 | 170.71046 |
| 31.44 | 153.26496 | 31.44 | 188.59424 | 31.44 | 213.03836 | 31.44 | 153.63144 | 31.44 | 172.47437 |
| 31.46 | 154.39126 | 31.46 | 190.74548 | 31.46 | 213.03155 | 31.46 | 155.23322 | 31.46 | 168.29346 |
| 31.48 | 158.35397 | 31.48 | 190.98594 | 31.48 | 211.29804 | 31.48 | 154.58524 | 31.48 | 167.4316 |
| 31.5 | 160.07541 | 31.5 | 192.60338 | 31.5 | 210.06868 | 31.5 | 155.00069 | 31.5 | 167.80231 |
| 31.52 | 159.53689 | 31.52 | 192.46842 | 31.52 | 209.75231 | 31.52 | 154.81268 | 31.52 | 164.69428 |
| 31.54 | 159.94592 | 31.54 | 191.38213 | 31.54 | 211.34199 | 31.54 | 153.97122 | 31.54 | 162.15856 |
| 31.56 | 162.6955 | 31.56 | 188.54495 | 31.56 | 209.49693 | 31.56 | 154.99786 | 31.56 | 162.72559 |
| 31.58 | 166.73711 | 31.58 | 190.39079 | 31.58 | 207.68959 | 31.58 | 154.53314 | 31.58 | 162.57194 |
| 31.6 | 167.95345 | 31.6 | 187.64461 | 31.6 | 205.78486 | 31.6 | 152.45836 | 31.6 | 162.83754 |
| 31.62 | 168.76566 | 31.62 | 186.30009 | 31.62 | 206.53136 | 31.62 | 150.84356 | 31.62 | 162.94721 |
| 31.64 | 169.59523 | 31.64 | 183.82306 | 31.64 | 205.76124 | 31.64 | 148.96527 | 31.64 | 161.60989 |
| 31.66 | 168.36683 | 31.66 | 181.51024 | 31.66 | 206.54193 | 31.66 | 147.45938 | 31.66 | 162.17387 |
| 31.68 | 167.60333 | 31.68 | 180.83224 | 31.68 | 203.80874 | 31.68 | 146.43521 | 31.68 | 160.05171 |
| 31.7 | 171.23193 | 31.7 | 183.66678 | 31.7 | 202.30057 | 31.7 | 145.27303 | 31.7 | 158.23834 |
| 31.72 | 170.07394 | 31.72 | 185.39521 | 31.72 | 203.48425 | 31.72 | 144.04668 | 31.72 | 159.46053 |
| 31.74 | 169.2921 | 31.74 | 186.77293 | 31.74 | 204.48539 | 31.74 | 143.5627 | 31.74 | 160.07061 |
| 31.76 | 168.66071 | 31.76 | 185.92617 | 31.76 | 207.57945 | 31.76 | 143.69728 | 31.76 | 161.63556 |
| 31.78 | 167.65824 | 31.78 | 185.81632 | 31.78 | 207.65701 | 31.78 | 143.83825 | 31.78 | 161.57138 |
| 31.8 | 164.6327 | 31.8 | 183.81475 | 31.8 | 208.21272 | 31.8 | 143.5268 | 31.8 | 161.23803 |
| 31.82 | 166.45627 | 31.82 | 180.9944 | 31.82 | 210.55648 | 31.82 | 143.584 | 31.82 | 162.04177 |
| 31.84 | 164.29219 | 31.84 | 181.64504 | 31.84 | 210.0897 | 31.84 | 141.55506 | 31.84 | 160.64936 |
| 31.86 | 163.44769 | 31.86 | 177.78087 | 31.86 | 212.54728 | 31.86 | 139.0718 | 31.86 | 160.56838 |
| 31.88 | 163.19192 | 31.88 | 174.42575 | 31.88 | 213.49936 | 31.88 | 137.47342 | 31.88 | 160.72034 |
| 31.9 | 160.40798 | 31.9 | 176.21156 | 31.9 | 215.69345 | 31.9 | 136.92812 | 31.9 | 161.48236 |
| 31.92 | 159.58387 | 31.92 | 175.28574 | 31.92 | 215.3637 | 31.92 | 136.94567 | 31.92 | 160.55292 |
| 31.94 | 155.09224 | 31.94 | 176.5691 | 31.94 | 215.69026 | 31.94 | 134.77178 | 31.94 | 161.41722 |
| 31.96 | 153.11692 | 31.96 | 177.44439 | 31.96 | 215.33201 | 31.96 | 136.69407 | 31.96 | 160.38683 |
| 31.98 | 152.6737 | 31.98 | 177.16261 | 31.98 | 214.51471 | 31.98 | 139.18865 | 31.98 | 160.21412 |
| 32 | 150.74577 | 32 | 176.29718 | 32 | 213.5379 | 32 | 139.37195 | 32 | 160.40704 |
| 32.02 | 150.38375 | 32.02 | 176.54636 | 32.02 | 209.81547 | 32.02 | 140.59411 | 32.02 | 158.13179 |
| 32.04 | 149.8358 | 32.04 | 179.44394 | 32.04 | 206.91565 | 32.04 | 140.05654 | 32.04 | 160.87836 |
| 32.06 | 151.16104 | 32.06 | 176.63603 | 32.06 | 204.72703 | 32.06 | 141.05372 | 32.06 | 161.23815 |
| 32.08 | 149.88335 | 32.08 | 174.92291 | 32.08 | 203.33646 | 32.08 | 139.55842 | 32.08 | 160.38968 |
| 32.1 | 145.86967 | 32.1 | 174.05123 | 32.1 | 202.12241 | 32.1 | 140.92218 | 32.1 | 159.11522 |
| 32.12 | 145.65392 | 32.12 | 172.33735 | 32.12 | 203.19378 | 32.12 | 140.378 | 32.12 | 158.87776 |
| 32.14 | 146.10298 | 32.14 | 169.35597 | 32.14 | 204.17909 | 32.14 | 139.68525 | 32.14 | 158.86133 |
| 32.16 | 145.94085 | 32.16 | 169.04227 | 32.16 | 204.81765 | 32.16 | 141.83517 | 32.16 | 159.55423 |
| 32.18 | 145.82475 | 32.18 | 169.24103 | 32.18 | 206.3694 | 32.18 | 144.47302 | 32.18 | 160.29244 |
| 32.2 | 144.37495 | 32.2 | 167.23816 | 32.2 | 206.19274 | 32.2 | 147.19375 | 32.2 | 158.86883 |
| 32.22 | 142.42002 | 32.22 | 165.15372 | 32.22 | 206.03212 | 32.22 | 145.65368 | 32.22 | 158.49281 |
| 32.24 | 139.66608 | 32.24 | 164.68955 | 32.24 | 204.1393 | 32.24 | 146.85999 | 32.24 | 159.84525 |
| 32.26 | 134.82943 | 32.26 | 166.04142 | 32.26 | 202.86334 | 32.26 | 147.75638 | 32.26 | 160.0793 |
| 32.28 | 135.54444 | 32.28 | 168.05505 | 32.28 | 198.75016 | 32.28 | 147.10669 | 32.28 | 158.57718 |
| 32.3 | 135.34229 | 32.3 | 167.44667 | 32.3 | 195.31049 | 32.3 | 149.09504 | 32.3 | 157.04072 |
| 32.32 | 134.09554 | 32.32 | 167.34626 | 32.32 | 191.3136 | 32.32 | 147.32244 | 32.32 | 155.42159 |
| 32.34 | 132.49829 | 32.34 | 169.01352 | 32.34 | 191.545 | 32.34 | 147.75998 | 32.34 | 152.79657 |
| 32.36 | 131.81047 | 32.36 | 172.74423 | 32.36 | 189.77258 | 32.36 | 149.45838 | 32.36 | 151.14064 |
| 32.38 | 128.61749 | 32.38 | 175.65427 | 32.38 | 190.40623 | 32.38 | 150.71566 | 32.38 | 148.70419 |
| 32.4 | 128.68731 | 32.4 | 178.58714 | 32.4 | 191.18312 | 32.4 | 150.19243 | 32.4 | 146.02274 |
| 32.42 | 128.15163 | 32.42 | 181.20084 | 32.42 | 189.26893 | 32.42 | 150.05633 | 32.42 | 149.53111 |
| 32.44 | 128.80868 | 32.44 | 179.26288 | 32.44 | 190.52773 | 32.44 | 151.63717 | 32.44 | 151.97736 |
| 32.46 | 130.57352 | 32.46 | 178.74249 | 32.46 | 191.26293 | 32.46 | 151.30704 | 32.46 | 153.08176 |
| 32.48 | 130.49387 | 32.48 | 177.90008 | 32.48 | 192.37299 | 32.48 | 152.46542 | 32.48 | 157.17962 |
| 32.5 | 129.1637 | 32.5 | 179.17151 | 32.5 | 195.82796 | 32.5 | 155.66689 | 32.5 | 161.98551 |
| 32.52 | 128.59576 | 32.52 | 178.70886 | 32.52 | 198.54773 | 32.52 | 156.72523 | 32.52 | 166.20001 |
| 32.54 | 129.23583 | 32.54 | 180.54299 | 32.54 | 202.63369 | 32.54 | 156.70581 | 32.54 | 173.03238 |
| 32.56 | 129.17505 | 32.56 | 177.32434 | 32.56 | 201.66444 | 32.56 | 158.98048 | 32.56 | 182.67076 |
| 32.58 | 127.92702 | 32.58 | 178.96935 | 32.58 | 201.42019 | 32.58 | 160.85936 | 32.58 | 188.7345 |
| 32.6 | 125.75804 | 32.6 | 177.24885 | 32.6 | 205.73342 | 32.6 | 164.2326 | 32.6 | 197.67938 |
| 32.62 | 127.54818 | 32.62 | 181.27271 | 32.62 | 211.12385 | 32.62 | 166.44914 | 32.62 | 205.03609 |
| 32.64 | 126.85055 | 32.64 | 185.43173 | 32.64 | 215.49503 | 32.64 | 169.63667 | 32.64 | 211.56681 |
| 32.66 | 126.91529 | 32.66 | 188.48842 | 32.66 | 222.00953 | 32.66 | 172.27452 | 32.66 | 217.63603 |
| 32.68 | 125.19932 | 32.68 | 192.19649 | 32.68 | 230.9631 | 32.68 | 175.1838 | 32.68 | 222.43153 |
| 32.7 | 124.96204 | 32.7 | 197.46387 | 32.7 | 239.48897 | 32.7 | 178.24447 | 32.7 | 229.78616 |
| 32.72 | 123.9239 | 32.72 | 199.43049 | 32.72 | 244.62214 | 32.72 | 179.46816 | 32.72 | 234.71852 |
| 32.74 | 125.47187 | 32.74 | 204.23204 | 32.74 | 250.85955 | 32.74 | 179.70958 | 32.74 | 239.32451 |
| 32.76 | 124.12679 | 32.76 | 208.30386 | 32.76 | 258.50074 | 32.76 | 180.70376 | 32.76 | 241.14748 |
| 32.78 | 123.91031 | 32.78 | 211.84228 | 32.78 | 261.55764 | 32.78 | 182.96655 | 32.78 | 242.85666 |
| 32.8 | 124.5966 | 32.8 | 213.45048 | 32.8 | 265.99393 | 32.8 | 186.53309 | 32.8 | 242.69623 |
| 32.82 | 126.11004 | 32.82 | 216.88187 | 32.82 | 267.88789 | 32.82 | 185.61349 | 32.82 | 245.17231 |
| 32.84 | 126.2954 | 32.84 | 221.38177 | 32.84 | 270.78908 | 32.84 | 184.57515 | 32.84 | 245.76556 |
| 32.86 | 127.33733 | 32.86 | 223.2063 | 32.86 | 272.70097 | 32.86 | 184.56477 | 32.86 | 248.50514 |
| 32.88 | 128.79186 | 32.88 | 227.47064 | 32.88 | 270.99672 | 32.88 | 186.14126 | 32.88 | 251.14017 |
| 32.9 | 127.46775 | 32.9 | 229.96128 | 32.9 | 273.4175 | 32.9 | 186.8574 | 32.9 | 251.05523 |
| 32.92 | 128.95155 | 32.92 | 230.00301 | 32.92 | 273.99152 | 32.92 | 186.18051 | 32.92 | 250.34438 |
| 32.94 | 129.94496 | 32.94 | 230.22252 | 32.94 | 275.85625 | 32.94 | 185.31488 | 32.94 | 247.03741 |
| 32.96 | 132.33498 | 32.96 | 230.34599 | 32.96 | 276.8289 | 32.96 | 187.0854 | 32.96 | 244.21232 |
| 32.98 | 134.06076 | 32.98 | 231.11497 | 32.98 | 277.53296 | 32.98 | 185.19145 | 32.98 | 243.28401 |
| 33 | 136.6537 | 33 | 231.3309 | 33 | 276.20206 | 33 | 183.32146 | 33 | 242.17298 |
| 33.02 | 139.18149 | 33.02 | 230.77936 | 33.02 | 275.42041 | 33.02 | 182.72594 | 33.02 | 239.31429 |
| 33.04 | 141.30027 | 33.04 | 226.97614 | 33.04 | 276.44989 | 33.04 | 181.34975 | 33.04 | 237.91976 |
| 33.06 | 141.34123 | 33.06 | 223.69652 | 33.06 | 272.73518 | 33.06 | 179.26724 | 33.06 | 231.55739 |
| 33.08 | 140.62114 | 33.08 | 221.40445 | 33.08 | 270.26816 | 33.08 | 175.15032 | 33.08 | 228.15544 |
| 33.1 | 142.51757 | 33.1 | 219.23451 | 33.1 | 268.31605 | 33.1 | 174.03421 | 33.1 | 225.62367 |
| 33.12 | 143.02004 | 33.12 | 216.03627 | 33.12 | 266.12234 | 33.12 | 170.10472 | 33.12 | 222.84669 |
| 33.14 | 143.25146 | 33.14 | 209.92081 | 33.14 | 265.86433 | 33.14 | 168.7691 | 33.14 | 218.63351 |
| 33.16 | 141.99815 | 33.16 | 207.16123 | 33.16 | 261.42086 | 33.16 | 167.55445 | 33.16 | 212.99163 |
| 33.18 | 143.69939 | 33.18 | 204.88126 | 33.18 | 257.95155 | 33.18 | 164.28936 | 33.18 | 206.68327 |
| 33.2 | 144.6462 | 33.2 | 201.77114 | 33.2 | 251.84741 | 33.2 | 161.66001 | 33.2 | 197.5349 |
| 33.22 | 146.04657 | 33.22 | 197.91411 | 33.22 | 246.76742 | 33.22 | 156.9453 | 33.22 | 190.88867 |
| 33.24 | 144.63733 | 33.24 | 196.96787 | 33.24 | 241.73123 | 33.24 | 154.36502 | 33.24 | 185.64358 |
| 33.26 | 146.50466 | 33.26 | 194.40063 | 33.26 | 236.57254 | 33.26 | 151.88272 | 33.26 | 178.66778 |
| 33.28 | 148.3635 | 33.28 | 192.96118 | 33.28 | 231.03067 | 33.28 | 148.59933 | 33.28 | 172.42736 |
| 33.3 | 147.94237 | 33.3 | 190.77575 | 33.3 | 225.97355 | 33.3 | 148.87678 | 33.3 | 166.4178 |
| 33.32 | 146.25302 | 33.32 | 188.30156 | 33.32 | 221.11669 | 33.32 | 146.59775 | 33.32 | 160.11074 |
| 33.34 | 144.19257 | 33.34 | 187.09484 | 33.34 | 215.98501 | 33.34 | 145.18867 | 33.34 | 155.68785 |
| 33.36 | 142.80071 | 33.36 | 184.19633 | 33.36 | 210.68988 | 33.36 | 143.82867 | 33.36 | 152.60264 |
| 33.38 | 140.41975 | 33.38 | 179.96125 | 33.38 | 208.02316 | 33.38 | 141.13797 | 33.38 | 151.75136 |
| 33.4 | 142.41621 | 33.4 | 176.3649 | 33.4 | 204.74616 | 33.4 | 138.87236 | 33.4 | 149.47723 |
| 33.42 | 141.74028 | 33.42 | 171.79042 | 33.42 | 198.37683 | 33.42 | 138.4437 | 33.42 | 150.03783 |
| 33.44 | 141.26632 | 33.44 | 166.70045 | 33.44 | 196.17256 | 33.44 | 137.24417 | 33.44 | 147.60481 |
| 33.46 | 142.80695 | 33.46 | 164.47882 | 33.46 | 195.26105 | 33.46 | 135.21503 | 33.46 | 150.00353 |
| 33.48 | 139.92071 | 33.48 | 161.27449 | 33.48 | 190.88684 | 33.48 | 135.85849 | 33.48 | 150.16493 |
| 33.5 | 140.57645 | 33.5 | 159.04471 | 33.5 | 188.64802 | 33.5 | 134.13572 | 33.5 | 154.2443 |
| 33.52 | 142.21562 | 33.52 | 156.13393 | 33.52 | 186.01432 | 33.52 | 131.38423 | 33.52 | 155.85816 |
| 33.54 | 143.36948 | 33.54 | 155.40591 | 33.54 | 185.37256 | 33.54 | 131.63319 | 33.54 | 158.25745 |
| 33.56 | 145.18303 | 33.56 | 155.45704 | 33.56 | 184.57017 | 33.56 | 133.02752 | 33.56 | 160.23672 |
| 33.58 | 143.87911 | 33.58 | 159.30745 | 33.58 | 182.5518 | 33.58 | 133.30329 | 33.58 | 160.39941 |
| 33.6 | 143.94762 | 33.6 | 159.55299 | 33.6 | 185.23437 | 33.6 | 133.94808 | 33.6 | 161.19104 |
| 33.62 | 145.79005 | 33.62 | 163.35505 | 33.62 | 186.22364 | 33.62 | 132.32027 | 33.62 | 159.22271 |
| 33.64 | 144.55446 | 33.64 | 160.69341 | 33.64 | 185.84934 | 33.64 | 132.15645 | 33.64 | 159.20761 |
| 33.66 | 142.38114 | 33.66 | 160.39556 | 33.66 | 187.82069 | 33.66 | 132.89069 | 33.66 | 160.68311 |
| 33.68 | 140.91262 | 33.68 | 161.97317 | 33.68 | 186.53998 | 33.68 | 132.95994 | 33.68 | 159.69631 |
| 33.7 | 143.83415 | 33.7 | 164.20577 | 33.7 | 184.17885 | 33.7 | 131.63526 | 33.7 | 159.83051 |
| 33.72 | 144.95647 | 33.72 | 163.29748 | 33.72 | 181.19237 | 33.72 | 129.81754 | 33.72 | 158.11643 |
| 33.74 | 143.83771 | 33.74 | 167.8814 | 33.74 | 180.50907 | 33.74 | 129.26242 | 33.74 | 158.03545 |
| 33.76 | 140.40595 | 33.76 | 167.53712 | 33.76 | 180.28634 | 33.76 | 130.60447 | 33.76 | 155.52709 |
| 33.78 | 140.603 | 33.78 | 168.9724 | 33.78 | 178.93296 | 33.78 | 132.05863 | 33.78 | 156.57563 |
| 33.8 | 139.35117 | 33.8 | 170.49658 | 33.8 | 179.26629 | 33.8 | 130.80566 | 33.8 | 156.88744 |
| 33.82 | 138.35435 | 33.82 | 170.9611 | 33.82 | 178.38388 | 33.82 | 131.09615 | 33.82 | 156.88084 |
| 33.84 | 136.06627 | 33.84 | 171.44826 | 33.84 | 181.51532 | 33.84 | 132.48425 | 33.84 | 155.8899 |
| 33.86 | 133.56357 | 33.86 | 170.46505 | 33.86 | 179.91826 | 33.86 | 133.74192 | 33.86 | 154.07899 |
| 33.88 | 132.98086 | 33.88 | 170.02033 | 33.88 | 182.63274 | 33.88 | 134.68231 | 33.88 | 154.23923 |
| 33.9 | 129.94324 | 33.9 | 169.6683 | 33.9 | 186.86199 | 33.9 | 134.02546 | 33.9 | 153.22372 |
| 33.92 | 131.40229 | 33.92 | 168.56919 | 33.92 | 186.59604 | 33.92 | 133.33443 | 33.92 | 151.94829 |
| 33.94 | 129.82184 | 33.94 | 169.71796 | 33.94 | 185.65829 | 33.94 | 135.0102 | 33.94 | 150.86238 |
| 33.96 | 129.10343 | 33.96 | 169.45937 | 33.96 | 186.97674 | 33.96 | 136.27979 | 33.96 | 152.45943 |
| 33.98 | 130.40319 | 33.98 | 168.42989 | 33.98 | 187.12679 | 33.98 | 136.65297 | 33.98 | 155.26507 |
| 34 | 129.74763 | 34 | 166.65147 | 34 | 189.51549 | 34 | 137.10825 | 34 | 157.91765 |
| 34.02 | 129.35085 | 34.02 | 165.7128 | 34.02 | 193.50632 | 34.02 | 137.91008 | 34.02 | 157.40349 |
| 34.04 | 129.11284 | 34.04 | 164.13198 | 34.04 | 193.74963 | 34.04 | 137.92615 | 34.04 | 156.89876 |
| 34.06 | 129.17607 | 34.06 | 163.19122 | 34.06 | 194.34459 | 34.06 | 138.16059 | 34.06 | 158.59549 |
| 34.08 | 129.76253 | 34.08 | 162.21707 | 34.08 | 197.68708 | 34.08 | 139.56246 | 34.08 | 160.12761 |
| 34.1 | 131.76389 | 34.1 | 161.20895 | 34.1 | 199.92233 | 34.1 | 140.72614 | 34.1 | 161.53763 |
| 34.12 | 132.17594 | 34.12 | 163.62957 | 34.12 | 202.46355 | 34.12 | 141.50723 | 34.12 | 164.79516 |
| 34.14 | 131.91092 | 34.14 | 161.76695 | 34.14 | 204.95002 | 34.14 | 140.64765 | 34.14 | 166.34637 |
| 34.16 | 132.02172 | 34.16 | 160.56424 | 34.16 | 205.74807 | 34.16 | 139.52908 | 34.16 | 168.0782 |
| 34.18 | 132.87847 | 34.18 | 161.35871 | 34.18 | 204.72822 | 34.18 | 139.90661 | 34.18 | 167.20123 |
| 34.2 | 129.78986 | 34.2 | 161.36987 | 34.2 | 205.03911 | 34.2 | 141.23055 | 34.2 | 167.03228 |
| 34.22 | 129.47614 | 34.22 | 161.42611 | 34.22 | 204.58098 | 34.22 | 142.95878 | 34.22 | 172.52147 |
| 34.24 | 128.91421 | 34.24 | 162.62416 | 34.24 | 204.24728 | 34.24 | 143.09544 | 34.24 | 173.30764 |
| 34.26 | 127.75262 | 34.26 | 164.56251 | 34.26 | 204.76635 | 34.26 | 145.14059 | 34.26 | 174.00395 |
| 34.28 | 126.62028 | 34.28 | 165.4153 | 34.28 | 205.31848 | 34.28 | 148.58345 | 34.28 | 175.01492 |
| 34.3 | 125.31713 | 34.3 | 164.85112 | 34.3 | 205.62408 | 34.3 | 150.25902 | 34.3 | 177.06706 |
| 34.32 | 123.98001 | 34.32 | 166.04747 | 34.32 | 208.20984 | 34.32 | 149.52513 | 34.32 | 178.31209 |
| 34.34 | 121.36574 | 34.34 | 166.65641 | 34.34 | 207.14885 | 34.34 | 150.67103 | 34.34 | 179.17566 |
| 34.36 | 121.8067 | 34.36 | 169.39147 | 34.36 | 206.69397 | 34.36 | 151.59518 | 34.36 | 180.18849 |
| 34.38 | 122.84427 | 34.38 | 171.66653 | 34.38 | 204.92478 | 34.38 | 152.11616 | 34.38 | 182.83805 |
| 34.4 | 124.80055 | 34.4 | 175.09846 | 34.4 | 204.4897 | 34.4 | 152.2245 | 34.4 | 185.01534 |
| 34.42 | 126.20678 | 34.42 | 174.18186 | 34.42 | 208.08305 | 34.42 | 152.9412 | 34.42 | 186.82739 |
| 34.44 | 129.47527 | 34.44 | 177.32953 | 34.44 | 211.23166 | 34.44 | 153.40212 | 34.44 | 190.11681 |
| 34.46 | 131.66484 | 34.46 | 176.91068 | 34.46 | 213.36781 | 34.46 | 153.15766 | 34.46 | 191.84805 |
| 34.48 | 134.05921 | 34.48 | 180.91663 | 34.48 | 212.91328 | 34.48 | 153.1237 | 34.48 | 191.65853 |
| 34.5 | 138.84869 | 34.5 | 184.95372 | 34.5 | 213.57695 | 34.5 | 153.24259 | 34.5 | 193.54421 |
| 34.52 | 141.35141 | 34.52 | 187.50323 | 34.52 | 215.46754 | 34.52 | 155.40646 | 34.52 | 194.86152 |
| 34.54 | 140.58129 | 34.54 | 190.65355 | 34.54 | 216.09835 | 34.54 | 154.76885 | 34.54 | 193.36091 |
| 34.56 | 143.30294 | 34.56 | 190.68998 | 34.56 | 216.29409 | 34.56 | 155.83967 | 34.56 | 193.08456 |
| 34.58 | 142.4141 | 34.58 | 190.36854 | 34.58 | 213.23154 | 34.58 | 156.53182 | 34.58 | 192.30671 |
| 34.6 | 145.46212 | 34.6 | 191.18904 | 34.6 | 214.46543 | 34.6 | 157.77571 | 34.6 | 189.91559 |
| 34.62 | 146.74016 | 34.62 | 193.62851 | 34.62 | 215.90902 | 34.62 | 160.23726 | 34.62 | 189.24438 |
| 34.64 | 145.92249 | 34.64 | 194.1442 | 34.64 | 218.03192 | 34.64 | 162.35527 | 34.64 | 189.13322 |
| 34.66 | 146.62353 | 34.66 | 198.59655 | 34.66 | 221.15618 | 34.66 | 162.71296 | 34.66 | 188.94747 |
| 34.68 | 148.16604 | 34.68 | 202.25365 | 34.68 | 221.08822 | 34.68 | 162.2169 | 34.68 | 185.00382 |
| 34.7 | 150.96962 | 34.7 | 203.37861 | 34.7 | 221.88099 | 34.7 | 161.35355 | 34.7 | 186.23147 |
| 34.72 | 150.91072 | 34.72 | 207.20108 | 34.72 | 223.43822 | 34.72 | 160.55926 | 34.72 | 183.88621 |
| 34.74 | 149.00845 | 34.74 | 211.2238 | 34.74 | 224.3599 | 34.74 | 160.78311 | 34.74 | 182.43544 |
| 34.76 | 148.11318 | 34.76 | 208.79282 | 34.76 | 227.79676 | 34.76 | 162.74107 | 34.76 | 180.623 |
| 34.78 | 151.65441 | 34.78 | 208.01571 | 34.78 | 225.23404 | 34.78 | 161.79746 | 34.78 | 180.23962 |
| 34.8 | 150.87298 | 34.8 | 209.0918 | 34.8 | 228.48854 | 34.8 | 161.65949 | 34.8 | 179.67221 |
| 34.82 | 149.93675 | 34.82 | 208.99422 | 34.82 | 230.08674 | 34.82 | 163.70522 | 34.82 | 177.43339 |
| 34.84 | 150.04245 | 34.84 | 210.21828 | 34.84 | 232.55036 | 34.84 | 161.90035 | 34.84 | 176.0485 |
| 34.86 | 151.01623 | 34.86 | 211.06578 | 34.86 | 229.52368 | 34.86 | 161.37449 | 34.86 | 173.7955 |
| 34.88 | 151.85203 | 34.88 | 210.06046 | 34.88 | 230.94442 | 34.88 | 158.42975 | 34.88 | 174.3391 |
| 34.9 | 150.85728 | 34.9 | 208.90791 | 34.9 | 230.26564 | 34.9 | 157.82178 | 34.9 | 172.0446 |
| 34.92 | 152.10362 | 34.92 | 207.54868 | 34.92 | 229.92718 | 34.92 | 158.5645 | 34.92 | 170.70236 |
| 34.94 | 149.99128 | 34.94 | 208.60572 | 34.94 | 231.37966 | 34.94 | 159.33558 | 34.94 | 169.10306 |
| 34.96 | 148.45481 | 34.96 | 205.46935 | 34.96 | 231.18658 | 34.96 | 157.462 | 34.96 | 168.07945 |
| 34.98 | 151.23819 | 34.98 | 203.94629 | 34.98 | 230.08444 | 34.98 | 157.21679 | 34.98 | 168.37882 |
| 35 | 151.74442 | 35 | 201.85735 | 35 | 230.50746 | 35 | 157.0775 | 35 | 167.31142 |
| 35.02 | 154.61857 | 35.02 | 203.05914 | 35.02 | 229.83398 | 35.02 | 157.53997 | 35.02 | 166.2867 |
| 35.04 | 155.57084 | 35.04 | 200.53134 | 35.04 | 226.34146 | 35.04 | 157.80329 | 35.04 | 164.81442 |
| 35.06 | 156.1256 | 35.06 | 198.21607 | 35.06 | 225.56266 | 35.06 | 155.33891 | 35.06 | 164.58206 |
| 35.08 | 156.86929 | 35.08 | 200.84901 | 35.08 | 223.33706 | 35.08 | 153.13613 | 35.08 | 163.67698 |
| 35.1 | 157.65752 | 35.1 | 199.3771 | 35.1 | 225.09568 | 35.1 | 151.85148 | 35.1 | 164.24137 |
| 35.12 | 155.9355 | 35.12 | 199.50717 | 35.12 | 224.194 | 35.12 | 151.0872 | 35.12 | 163.30269 |
| 35.14 | 155.77996 | 35.14 | 197.00259 | 35.14 | 222.87611 | 35.14 | 149.81291 | 35.14 | 161.05858 |
| 35.16 | 153.76691 | 35.16 | 195.985 | 35.16 | 221.44721 | 35.16 | 149.86934 | 35.16 | 160.4553 |
| 35.18 | 153.17628 | 35.18 | 194.99366 | 35.18 | 215.31419 | 35.18 | 152.07438 | 35.18 | 160.90263 |
| 35.2 | 152.65947 | 35.2 | 194.03423 | 35.2 | 212.53893 | 35.2 | 152.89111 | 35.2 | 162.30301 |
| 35.22 | 152.0651 | 35.22 | 193.06233 | 35.22 | 211.37884 | 35.22 | 152.72859 | 35.22 | 163.99672 |
| 35.24 | 151.44315 | 35.24 | 192.12799 | 35.24 | 208.05863 | 35.24 | 149.54844 | 35.24 | 164.23379 |
| 35.26 | 149.59826 | 35.26 | 191.75276 | 35.26 | 204.85413 | 35.26 | 150.4654 | 35.26 | 167.30049 |
| 35.28 | 150.01559 | 35.28 | 190.46412 | 35.28 | 202.67893 | 35.28 | 149.06805 | 35.28 | 166.71535 |
| 35.3 | 148.42211 | 35.3 | 191.13327 | 35.3 | 198.80434 | 35.3 | 147.12653 | 35.3 | 167.1678 |
| 35.32 | 146.11646 | 35.32 | 192.78545 | 35.32 | 196.044 | 35.32 | 146.64597 | 35.32 | 167.01283 |
| 35.34 | 143.37799 | 35.34 | 193.05292 | 35.34 | 191.41913 | 35.34 | 145.45286 | 35.34 | 168.14064 |
| 35.36 | 143.38481 | 35.36 | 192.43153 | 35.36 | 189.40267 | 35.36 | 145.88134 | 35.36 | 170.07783 |
| 35.38 | 143.7559 | 35.38 | 189.6338 | 35.38 | 191.78342 | 35.38 | 146.21451 | 35.38 | 170.51405 |
| 35.4 | 146.20217 | 35.4 | 188.84385 | 35.4 | 195.41147 | 35.4 | 145.21676 | 35.4 | 172.53862 |
| 35.42 | 145.64779 | 35.42 | 186.26 | 35.42 | 199.15902 | 35.42 | 145.65542 | 35.42 | 174.11831 |
| 35.44 | 147.59821 | 35.44 | 187.41311 | 35.44 | 197.06196 | 35.44 | 147.28796 | 35.44 | 175.01056 |
| 35.46 | 146.82941 | 35.46 | 187.31365 | 35.46 | 198.0365 | 35.46 | 147.02503 | 35.46 | 174.36993 |
| 35.48 | 148.52669 | 35.48 | 193.53292 | 35.48 | 196.64595 | 35.48 | 146.84798 | 35.48 | 174.98754 |
| 35.5 | 146.40246 | 35.5 | 193.63088 | 35.5 | 199.37043 | 35.5 | 151.22803 | 35.5 | 174.27162 |
| 35.52 | 147.18447 | 35.52 | 192.61333 | 35.52 | 199.45274 | 35.52 | 153.95159 | 35.52 | 176.23996 |
| 35.54 | 145.86129 | 35.54 | 193.01613 | 35.54 | 200.94768 | 35.54 | 154.12903 | 35.54 | 174.65632 |
| 35.56 | 147.82566 | 35.56 | 193.87324 | 35.56 | 203.59591 | 35.56 | 157.0181 | 35.56 | 173.85298 |
| 35.58 | 144.86976 | 35.58 | 196.82723 | 35.58 | 203.78843 | 35.58 | 159.46511 | 35.58 | 171.17361 |
| 35.6 | 143.75819 | 35.6 | 199.17573 | 35.6 | 206.20393 | 35.6 | 160.2141 | 35.6 | 174.27071 |
| 35.62 | 144.72535 | 35.62 | 201.68466 | 35.62 | 209.07035 | 35.62 | 160.57313 | 35.62 | 176.17393 |
| 35.64 | 143.11868 | 35.64 | 204.73494 | 35.64 | 209.6404 | 35.64 | 158.3075 | 35.64 | 176.81135 |
| 35.66 | 144.17326 | 35.66 | 207.20742 | 35.66 | 210.25934 | 35.66 | 157.19442 | 35.66 | 178.76343 |
| 35.68 | 145.91509 | 35.68 | 207.604 | 35.68 | 211.47605 | 35.68 | 155.35802 | 35.68 | 180.26892 |
| 35.7 | 147.70392 | 35.7 | 209.02475 | 35.7 | 213.76566 | 35.7 | 154.38199 | 35.7 | 182.36201 |
| 35.72 | 147.94288 | 35.72 | 210.14162 | 35.72 | 216.08639 | 35.72 | 152.88443 | 35.72 | 180.37006 |
| 35.74 | 151.46902 | 35.74 | 208.56475 | 35.74 | 215.65015 | 35.74 | 152.50787 | 35.74 | 180.98389 |
| 35.76 | 154.67522 | 35.76 | 208.24329 | 35.76 | 218.30235 | 35.76 | 152.49015 | 35.76 | 185.33712 |
| 35.78 | 157.76533 | 35.78 | 211.01419 | 35.78 | 220.12816 | 35.78 | 151.38632 | 35.78 | 184.59683 |
| 35.8 | 157.50939 | 35.8 | 213.20034 | 35.8 | 227.01941 | 35.8 | 149.97162 | 35.8 | 187.43344 |
| 35.82 | 157.78459 | 35.82 | 211.6886 | 35.82 | 226.47845 | 35.82 | 150.12735 | 35.82 | 185.74804 |
| 35.84 | 158.13247 | 35.84 | 211.4604 | 35.84 | 226.20398 | 35.84 | 148.34209 | 35.84 | 185.74692 |
| 35.86 | 158.40485 | 35.86 | 211.9974 | 35.86 | 228.34124 | 35.86 | 147.64956 | 35.86 | 184.27237 |
| 35.88 | 156.45577 | 35.88 | 210.077 | 35.88 | 230.319 | 35.88 | 148.04217 | 35.88 | 184.28238 |
| 35.9 | 157.05959 | 35.9 | 210.0334 | 35.9 | 231.50495 | 35.9 | 149.66432 | 35.9 | 182.23233 |
| 35.92 | 159.97379 | 35.92 | 209.201 | 35.92 | 234.3865 | 35.92 | 150.18884 | 35.92 | 182.5115 |
| 35.94 | 161.10481 | 35.94 | 206.82685 | 35.94 | 237.1042 | 35.94 | 150.35741 | 35.94 | 183.52682 |
| 35.96 | 162.96498 | 35.96 | 206.04217 | 35.96 | 237.52152 | 35.96 | 149.5484 | 35.96 | 185.92231 |
| 35.98 | 167.99473 | 35.98 | 206.24545 | 35.98 | 240.2228 | 35.98 | 151.33951 | 35.98 | 185.32734 |
| 36 | 167.09853 | 36 | 208.0675 | 36 | 241.98595 | 36 | 149.43741 | 36 | 184.69066 |
| 36.02 | 168.60803 | 36.02 | 210.52981 | 36.02 | 244.81065 | 36.02 | 148.34452 | 36.02 | 183.86222 |
| 36.04 | 167.55802 | 36.04 | 208.75042 | 36.04 | 244.30705 | 36.04 | 147.62743 | 36.04 | 184.02189 |
| 36.06 | 167.55181 | 36.06 | 210.70572 | 36.06 | 246.50945 | 36.06 | 147.74254 | 36.06 | 185.37488 |
| 36.08 | 168.1398 | 36.08 | 211.32728 | 36.08 | 245.6629 | 36.08 | 149.80901 | 36.08 | 185.76466 |
| 36.1 | 166.83211 | 36.1 | 209.801 | 36.1 | 245.78145 | 36.1 | 152.84832 | 36.1 | 186.05909 |
| 36.12 | 167.13583 | 36.12 | 212.04059 | 36.12 | 243.07037 | 36.12 | 154.26886 | 36.12 | 185.0615 |
| 36.14 | 167.9205 | 36.14 | 211.78406 | 36.14 | 240.67014 | 36.14 | 156.08901 | 36.14 | 186.40901 |
| 36.16 | 166.71078 | 36.16 | 209.37158 | 36.16 | 236.91922 | 36.16 | 156.83817 | 36.16 | 186.84786 |
| 36.18 | 166.20021 | 36.18 | 208.64149 | 36.18 | 237.15158 | 36.18 | 159.41881 | 36.18 | 184.05278 |
| 36.2 | 166.53317 | 36.2 | 208.67076 | 36.2 | 237.59687 | 36.2 | 159.66684 | 36.2 | 179.31107 |
| 36.22 | 165.90403 | 36.22 | 208.91916 | 36.22 | 236.64043 | 36.22 | 158.64209 | 36.22 | 178.67139 |
| 36.24 | 165.19373 | 36.24 | 208.45256 | 36.24 | 233.58449 | 36.24 | 156.57767 | 36.24 | 178.02508 |
| 36.26 | 163.61441 | 36.26 | 207.72985 | 36.26 | 233.41782 | 36.26 | 156.79795 | 36.26 | 175.28 |
| 36.28 | 161.23987 | 36.28 | 208.81878 | 36.28 | 235.48753 | 36.28 | 157.24209 | 36.28 | 173.49927 |
| 36.3 | 159.88461 | 36.3 | 209.6142 | 36.3 | 234.41954 | 36.3 | 158.85176 | 36.3 | 174.56612 |
| 36.32 | 158.73832 | 36.32 | 209.77599 | 36.32 | 236.4702 | 36.32 | 160.43599 | 36.32 | 175.68563 |
| 36.34 | 158.26738 | 36.34 | 209.60742 | 36.34 | 237.09252 | 36.34 | 164.00759 | 36.34 | 174.75639 |
| 36.36 | 160.1019 | 36.36 | 207.24026 | 36.36 | 239.13712 | 36.36 | 165.68071 | 36.36 | 172.70876 |
| 36.38 | 160.8237 | 36.38 | 208.61629 | 36.38 | 242.87788 | 36.38 | 165.25035 | 36.38 | 173.81201 |
| 36.4 | 159.86144 | 36.4 | 209.74015 | 36.4 | 243.73804 | 36.4 | 164.76243 | 36.4 | 175.91473 |
| 36.42 | 156.61184 | 36.42 | 210.99519 | 36.42 | 243.36205 | 36.42 | 167.0437 | 36.42 | 177.65581 |
| 36.44 | 156.03254 | 36.44 | 213.47883 | 36.44 | 242.86523 | 36.44 | 168.13018 | 36.44 | 176.93949 |
| 36.46 | 152.81821 | 36.46 | 211.74382 | 36.46 | 243.61439 | 36.46 | 165.35078 | 36.46 | 174.72049 |
| 36.48 | 149.61429 | 36.48 | 212.69554 | 36.48 | 243.19535 | 36.48 | 165.13183 | 36.48 | 172.05718 |
| 36.5 | 146.90529 | 36.5 | 209.36308 | 36.5 | 243.04546 | 36.5 | 166.09334 | 36.5 | 172.30845 |
| 36.52 | 146.82959 | 36.52 | 208.57786 | 36.52 | 242.39502 | 36.52 | 162.78183 | 36.52 | 174.15502 |
| 36.54 | 142.61128 | 36.54 | 212.22121 | 36.54 | 244.94737 | 36.54 | 160.96092 | 36.54 | 174.34132 |
| 36.56 | 140.18842 | 36.56 | 214.48835 | 36.56 | 242.63909 | 36.56 | 158.03129 | 36.56 | 173.31506 |
| 36.58 | 138.49734 | 36.58 | 214.18448 | 36.58 | 243.5017 | 36.58 | 156.0073 | 36.58 | 173.86981 |
| 36.6 | 139.60457 | 36.6 | 213.49045 | 36.6 | 242.17044 | 36.6 | 153.64901 | 36.6 | 177.73004 |
| 36.62 | 140.45264 | 36.62 | 215.6932 | 36.62 | 246.03009 | 36.62 | 152.6671 | 36.62 | 176.71567 |
| 36.64 | 139.73557 | 36.64 | 216.54732 | 36.64 | 246.15146 | 36.64 | 150.07587 | 36.64 | 173.69408 |
| 36.66 | 142.10595 | 36.66 | 214.75036 | 36.66 | 247.24831 | 36.66 | 151.0512 | 36.66 | 174.39059 |
| 36.68 | 142.73429 | 36.68 | 214.34586 | 36.68 | 249.14869 | 36.68 | 150.39661 | 36.68 | 176.52939 |
| 36.7 | 145.81626 | 36.7 | 210.98487 | 36.7 | 251.12552 | 36.7 | 149.46645 | 36.7 | 174.34251 |
| 36.72 | 145.47138 | 36.72 | 209.63564 | 36.72 | 252.15214 | 36.72 | 148.82338 | 36.72 | 172.84495 |
| 36.74 | 146.22092 | 36.74 | 208.1222 | 36.74 | 249.61112 | 36.74 | 148.52118 | 36.74 | 175.60873 |
| 36.76 | 144.28522 | 36.76 | 209.2268 | 36.76 | 251.53624 | 36.76 | 147.53513 | 36.76 | 178.344 |
| 36.78 | 144.10364 | 36.78 | 208.60204 | 36.78 | 255.57219 | 36.78 | 146.08907 | 36.78 | 177.03991 |
| 36.8 | 143.26008 | 36.8 | 205.35056 | 36.8 | 257.80632 | 36.8 | 143.91102 | 36.8 | 178.49107 |
| 36.82 | 140.28945 | 36.82 | 205.74298 | 36.82 | 256.7642 | 36.82 | 143.12486 | 36.82 | 176.76868 |
| 36.84 | 140.18429 | 36.84 | 207.5871 | 36.84 | 257.90483 | 36.84 | 143.19037 | 36.84 | 178.05846 |
| 36.86 | 142.40065 | 36.86 | 206.03834 | 36.86 | 259.10097 | 36.86 | 142.88648 | 36.86 | 178.47751 |
| 36.88 | 141.93461 | 36.88 | 205.3141 | 36.88 | 258.43751 | 36.88 | 143.61187 | 36.88 | 180.63065 |
| 36.9 | 143.14849 | 36.9 | 208.01669 | 36.9 | 260.54628 | 36.9 | 144.14735 | 36.9 | 183.59504 |
| 36.92 | 143.23606 | 36.92 | 208.30433 | 36.92 | 262.46781 | 36.92 | 146.05058 | 36.92 | 187.24519 |
| 36.94 | 143.57676 | 36.94 | 209.24261 | 36.94 | 260.19859 | 36.94 | 144.29007 | 36.94 | 186.51093 |
| 36.96 | 144.55698 | 36.96 | 212.3765 | 36.96 | 258.78255 | 36.96 | 144.3618 | 36.96 | 185.74477 |
| 36.98 | 147.50476 | 36.98 | 212.03807 | 36.98 | 256.3731 | 36.98 | 145.94753 | 36.98 | 183.19279 |
| 37 | 147.6382 | 37 | 215.08268 | 37 | 257.64078 | 37 | 146.10607 | 37 | 185.34819 |
| 37.02 | 148.60746 | 37.02 | 215.24841 | 37.02 | 259.04663 | 37.02 | 147.14271 | 37.02 | 185.87899 |
| 37.04 | 150.14239 | 37.04 | 216.01472 | 37.04 | 256.53394 | 37.04 | 150.50801 | 37.04 | 187.24934 |
| 37.06 | 152.32438 | 37.06 | 217.64233 | 37.06 | 253.9097 | 37.06 | 152.97765 | 37.06 | 184.0558 |
| 37.08 | 154.84464 | 37.08 | 217.00112 | 37.08 | 253.60979 | 37.08 | 155.08075 | 37.08 | 180.60442 |
| 37.1 | 155.69989 | 37.1 | 219.08554 | 37.1 | 255.38596 | 37.1 | 155.44106 | 37.1 | 181.99102 |
| 37.12 | 156.84959 | 37.12 | 222.58939 | 37.12 | 256.7097 | 37.12 | 155.03146 | 37.12 | 180.08347 |
| 37.14 | 158.59519 | 37.14 | 226.44866 | 37.14 | 255.31877 | 37.14 | 157.03696 | 37.14 | 180.91985 |
| 37.16 | 160.46103 | 37.16 | 229.13163 | 37.16 | 259.51349 | 37.16 | 158.67894 | 37.16 | 180.03458 |
| 37.18 | 159.72603 | 37.18 | 230.76078 | 37.18 | 262.92127 | 37.18 | 160.27372 | 37.18 | 178.18988 |
| 37.2 | 159.54632 | 37.2 | 231.18284 | 37.2 | 262.26969 | 37.2 | 159.45529 | 37.2 | 177.81104 |
| 37.22 | 157.55402 | 37.22 | 234.00867 | 37.22 | 262.62151 | 37.22 | 159.77314 | 37.22 | 178.97056 |
| 37.24 | 158.16974 | 37.24 | 234.18441 | 37.24 | 264.58191 | 37.24 | 160.84958 | 37.24 | 178.93431 |
| 37.26 | 156.81336 | 37.26 | 235.16575 | 37.26 | 265.97189 | 37.26 | 163.76129 | 37.26 | 179.38749 |
| 37.28 | 157.47704 | 37.28 | 238.2532 | 37.28 | 268.44911 | 37.28 | 167.04335 | 37.28 | 180.75597 |
| 37.3 | 158.71585 | 37.3 | 237.44003 | 37.3 | 269.20375 | 37.3 | 167.61396 | 37.3 | 179.98039 |
| 37.32 | 159.13679 | 37.32 | 238.20166 | 37.32 | 269.09993 | 37.32 | 168.42181 | 37.32 | 179.07907 |
| 37.34 | 159.08754 | 37.34 | 238.34774 | 37.34 | 269.7583 | 37.34 | 167.94256 | 37.34 | 176.89403 |
| 37.36 | 158.26666 | 37.36 | 236.00436 | 37.36 | 269.93024 | 37.36 | 166.14994 | 37.36 | 176.4627 |
| 37.38 | 156.6666 | 37.38 | 238.31188 | 37.38 | 271.66358 | 37.38 | 164.52571 | 37.38 | 178.22906 |
| 37.4 | 155.8761 | 37.4 | 234.19326 | 37.4 | 270.62221 | 37.4 | 163.61932 | 37.4 | 177.26866 |
| 37.42 | 155.8895 | 37.42 | 234.84183 | 37.42 | 269.21465 | 37.42 | 162.4428 | 37.42 | 175.92132 |
| 37.44 | 154.96232 | 37.44 | 232.5213 | 37.44 | 269.27974 | 37.44 | 161.11622 | 37.44 | 173.29347 |
| 37.46 | 153.18708 | 37.46 | 228.14937 | 37.46 | 267.17909 | 37.46 | 158.33153 | 37.46 | 170.54857 |
| 37.48 | 153.85453 | 37.48 | 230.2319 | 37.48 | 267.53718 | 37.48 | 161.05902 | 37.48 | 172.69057 |
| 37.5 | 153.99402 | 37.5 | 230.97898 | 37.5 | 265.17623 | 37.5 | 161.75326 | 37.5 | 174.93806 |
| 37.52 | 152.10741 | 37.52 | 228.70752 | 37.52 | 263.9684 | 37.52 | 158.7498 | 37.52 | 174.2168 |
| 37.54 | 150.23119 | 37.54 | 229.92197 | 37.54 | 263.27907 | 37.54 | 159.92743 | 37.54 | 173.04426 |
| 37.56 | 150.15041 | 37.56 | 226.65105 | 37.56 | 262.11107 | 37.56 | 160.6632 | 37.56 | 172.03441 |
| 37.58 | 150.93279 | 37.58 | 225.08232 | 37.58 | 263.8833 | 37.58 | 162.4003 | 37.58 | 170.83959 |
| 37.6 | 150.3975 | 37.6 | 224.15212 | 37.6 | 260.77827 | 37.6 | 163.48373 | 37.6 | 171.74636 |
| 37.62 | 150.41467 | 37.62 | 225.34053 | 37.62 | 260.2641 | 37.62 | 162.9001 | 37.62 | 170.15044 |
| 37.64 | 148.84405 | 37.64 | 223.41051 | 37.64 | 257.11303 | 37.64 | 158.38718 | 37.64 | 166.56261 |
| 37.66 | 148.80065 | 37.66 | 220.64865 | 37.66 | 254.44385 | 37.66 | 158.69845 | 37.66 | 169.98834 |
| 37.68 | 149.18533 | 37.68 | 219.21205 | 37.68 | 252.90984 | 37.68 | 156.56721 | 37.68 | 170.7475 |
| 37.7 | 148.76818 | 37.7 | 217.43945 | 37.7 | 250.94413 | 37.7 | 151.93404 | 37.7 | 168.8641 |
| 37.72 | 146.12108 | 37.72 | 218.72414 | 37.72 | 248.13412 | 37.72 | 148.82033 | 37.72 | 168.50981 |
| 37.74 | 148.24194 | 37.74 | 215.8113 | 37.74 | 247.99823 | 37.74 | 146.80951 | 37.74 | 169.67954 |
| 37.76 | 148.1366 | 37.76 | 215.17179 | 37.76 | 249.90805 | 37.76 | 146.85198 | 37.76 | 170.35131 |
| 37.78 | 148.31743 | 37.78 | 212.48637 | 37.78 | 250.81935 | 37.78 | 146.78686 | 37.78 | 170.63972 |
| 37.8 | 149.04149 | 37.8 | 210.16353 | 37.8 | 247.59296 | 37.8 | 147.59833 | 37.8 | 169.96209 |
| 37.82 | 147.85967 | 37.82 | 211.1245 | 37.82 | 245.12536 | 37.82 | 146.75593 | 37.82 | 171.36717 |
| 37.84 | 149.85407 | 37.84 | 209.29245 | 37.84 | 242.72496 | 37.84 | 149.19351 | 37.84 | 171.3498 |
| 37.86 | 152.29619 | 37.86 | 210.75512 | 37.86 | 241.40028 | 37.86 | 148.83054 | 37.86 | 169.12402 |
| 37.88 | 151.47717 | 37.88 | 211.12887 | 37.88 | 240.45048 | 37.88 | 149.77187 | 37.88 | 167.4071 |
| 37.9 | 148.59431 | 37.9 | 210.72135 | 37.9 | 239.60183 | 37.9 | 151.48103 | 37.9 | 167.74158 |
| 37.92 | 151.96848 | 37.92 | 209.63221 | 37.92 | 238.90081 | 37.92 | 151.53655 | 37.92 | 165.78005 |
| 37.94 | 152.01021 | 37.94 | 207.37886 | 37.94 | 236.07081 | 37.94 | 150.15846 | 37.94 | 164.0954 |
| 37.96 | 152.1178 | 37.96 | 207.52458 | 37.96 | 236.79864 | 37.96 | 151.46466 | 37.96 | 163.01515 |
| 37.98 | 152.81276 | 37.98 | 207.04324 | 37.98 | 233.95525 | 37.98 | 152.78215 | 37.98 | 161.86772 |
| 38 | 150.01787 | 38 | 208.01834 | 38 | 233.02225 | 38 | 150.62771 | 38 | 163.00969 |
| 38.02 | 149.83743 | 38.02 | 203.56146 | 38.02 | 231.21549 | 38.02 | 150.76362 | 38.02 | 163.62371 |
| 38.04 | 151.92185 | 38.04 | 202.61315 | 38.04 | 229.31359 | 38.04 | 151.63603 | 38.04 | 165.34686 |
| 38.06 | 151.93506 | 38.06 | 202.85002 | 38.06 | 228.37512 | 38.06 | 152.93051 | 38.06 | 165.78384 |
| 38.08 | 153.081 | 38.08 | 202.22636 | 38.08 | 226.99495 | 38.08 | 154.04567 | 38.08 | 166.85354 |
| 38.1 | 150.45014 | 38.1 | 203.62845 | 38.1 | 227.22466 | 38.1 | 154.93905 | 38.1 | 169.07989 |
| 38.12 | 150.29876 | 38.12 | 203.51045 | 38.12 | 225.10343 | 38.12 | 156.61916 | 38.12 | 166.68384 |
| 38.14 | 150.0651 | 38.14 | 204.05351 | 38.14 | 225.10248 | 38.14 | 158.57579 | 38.14 | 168.53534 |
| 38.16 | 148.67247 | 38.16 | 198.41106 | 38.16 | 225.1559 | 38.16 | 160.65721 | 38.16 | 167.04813 |
| 38.18 | 144.66842 | 38.18 | 195.18466 | 38.18 | 223.96691 | 38.18 | 160.98583 | 38.18 | 166.64344 |
| 38.2 | 144.42549 | 38.2 | 193.69328 | 38.2 | 224.53941 | 38.2 | 161.28047 | 38.2 | 166.65722 |
| 38.22 | 144.47531 | 38.22 | 195.01549 | 38.22 | 224.91067 | 38.22 | 162.32391 | 38.22 | 167.14325 |
| 38.24 | 143.46415 | 38.24 | 194.67459 | 38.24 | 225.48033 | 38.24 | 164.46948 | 38.24 | 165.62112 |
| 38.26 | 142.65327 | 38.26 | 193.48844 | 38.26 | 226.03207 | 38.26 | 164.75922 | 38.26 | 163.33756 |
| 38.28 | 143.34318 | 38.28 | 190.03874 | 38.28 | 224.69945 | 38.28 | 164.66939 | 38.28 | 163.11504 |
| 38.3 | 142.03982 | 38.3 | 188.4634 | 38.3 | 222.60164 | 38.3 | 163.78356 | 38.3 | 160.52664 |
| 38.32 | 142.11155 | 38.32 | 187.65195 | 38.32 | 223.59147 | 38.32 | 162.01851 | 38.32 | 159.78274 |
| 38.34 | 143.1733 | 38.34 | 188.83245 | 38.34 | 226.94377 | 38.34 | 161.91962 | 38.34 | 160.83335 |
| 38.36 | 142.72595 | 38.36 | 186.59949 | 38.36 | 226.75237 | 38.36 | 159.37823 | 38.36 | 163.37153 |
| 38.38 | 141.96488 | 38.38 | 189.04822 | 38.38 | 225.6427 | 38.38 | 157.20414 | 38.38 | 164.11975 |
| 38.4 | 141.79291 | 38.4 | 187.76149 | 38.4 | 224.00298 | 38.4 | 158.73059 | 38.4 | 163.5295 |
| 38.42 | 143.34749 | 38.42 | 188.6498 | 38.42 | 225.64174 | 38.42 | 158.55787 | 38.42 | 163.4691 |
| 38.44 | 141.00505 | 38.44 | 188.44425 | 38.44 | 225.42941 | 38.44 | 158.52861 | 38.44 | 162.63613 |
| 38.46 | 141.90597 | 38.46 | 190.10058 | 38.46 | 224.54265 | 38.46 | 158.32457 | 38.46 | 165.35741 |
| 38.48 | 142.56322 | 38.48 | 193.83943 | 38.48 | 227.67467 | 38.48 | 158.70604 | 38.48 | 165.22907 |
| 38.5 | 141.35992 | 38.5 | 194.19484 | 38.5 | 226.86171 | 38.5 | 157.24395 | 38.5 | 165.77325 |
| 38.52 | 141.28725 | 38.52 | 192.96834 | 38.52 | 227.8793 | 38.52 | 156.79395 | 38.52 | 166.08905 |
| 38.54 | 142.14193 | 38.54 | 194.41836 | 38.54 | 229.15549 | 38.54 | 157.83928 | 38.54 | 165.26478 |
| 38.56 | 142.72347 | 38.56 | 193.52084 | 38.56 | 230.19084 | 38.56 | 156.74716 | 38.56 | 164.32894 |
| 38.58 | 142.8118 | 38.58 | 195.47728 | 38.58 | 228.53434 | 38.58 | 151.57678 | 38.58 | 162.95765 |
| 38.6 | 143.4649 | 38.6 | 196.0809 | 38.6 | 227.3197 | 38.6 | 148.24922 | 38.6 | 164.66363 |
| 38.62 | 146.45855 | 38.62 | 198.88883 | 38.62 | 227.99507 | 38.62 | 145.49321 | 38.62 | 162.25457 |
| 38.64 | 148.44465 | 38.64 | 199.89942 | 38.64 | 228.25008 | 38.64 | 142.23567 | 38.64 | 160.5105 |
| 38.66 | 150.88317 | 38.66 | 201.14728 | 38.66 | 226.97674 | 38.66 | 145.32123 | 38.66 | 163.28103 |
| 38.68 | 150.98301 | 38.68 | 203.35759 | 38.68 | 229.03643 | 38.68 | 145.73196 | 38.68 | 162.12906 |
| 38.7 | 151.75369 | 38.7 | 205.99013 | 38.7 | 229.83976 | 38.7 | 144.98484 | 38.7 | 161.55524 |
| 38.72 | 153.02703 | 38.72 | 207.28369 | 38.72 | 229.31106 | 38.72 | 146.15115 | 38.72 | 159.0216 |
| 38.74 | 153.0091 | 38.74 | 208.9032 | 38.74 | 231.72336 | 38.74 | 148.50436 | 38.74 | 160.78438 |
| 38.76 | 153.82338 | 38.76 | 207.66343 | 38.76 | 229.95624 | 38.76 | 149.6067 | 38.76 | 160.51162 |
| 38.78 | 152.03286 | 38.78 | 210.2071 | 38.78 | 234.20588 | 38.78 | 149.71901 | 38.78 | 159.40948 |
| 38.8 | 152.12176 | 38.8 | 214.18264 | 38.8 | 233.08449 | 38.8 | 150.47271 | 38.8 | 159.14993 |
| 38.82 | 149.42257 | 38.82 | 218.79299 | 38.82 | 232.47501 | 38.82 | 148.7471 | 38.82 | 157.09873 |
| 38.84 | 150.09155 | 38.84 | 220.04272 | 38.84 | 230.94178 | 38.84 | 150.13446 | 38.84 | 155.30724 |
| 38.86 | 149.08965 | 38.86 | 223.95502 | 38.86 | 231.47029 | 38.86 | 151.54728 | 38.86 | 154.03427 |
| 38.88 | 146.56638 | 38.88 | 223.39461 | 38.88 | 233.81992 | 38.88 | 150.13878 | 38.88 | 155.97335 |
| 38.9 | 145.1409 | 38.9 | 225.10791 | 38.9 | 232.86292 | 38.9 | 149.45531 | 38.9 | 157.69497 |
| 38.92 | 144.15145 | 38.92 | 227.49679 | 38.92 | 230.65447 | 38.92 | 150.30661 | 38.92 | 157.81177 |
| 38.94 | 141.67406 | 38.94 | 226.52094 | 38.94 | 229.7913 | 38.94 | 151.81552 | 38.94 | 158.29025 |
| 38.96 | 141.82979 | 38.96 | 226.79218 | 38.96 | 230.0644 | 38.96 | 152.26194 | 38.96 | 157.35458 |
| 38.98 | 140.92263 | 38.98 | 226.39408 | 38.98 | 227.3671 | 38.98 | 153.44035 | 38.98 | 160.89654 |
| 39 | 140.98719 | 39 | 224.2 | 39 | 228.47338 | 39 | 151.64171 | 39 | 162.83749 |
| 39.02 | 142.46172 | 39.02 | 218.44524 | 39.02 | 231.15613 | 39.02 | 153.70878 | 39.02 | 164.34109 |
| 39.04 | 144.49159 | 39.04 | 218.60849 | 39.04 | 230.72237 | 39.04 | 153.62213 | 39.04 | 164.32881 |
| 39.06 | 144.65335 | 39.06 | 218.82364 | 39.06 | 230.64988 | 39.06 | 157.30872 | 39.06 | 162.20287 |
| 39.08 | 143.52972 | 39.08 | 215.68504 | 39.08 | 229.39616 | 39.08 | 156.59768 | 39.08 | 160.54351 |
| 39.1 | 141.59764 | 39.1 | 214.36848 | 39.1 | 231.48113 | 39.1 | 156.61865 | 39.1 | 161.49084 |
| 39.12 | 143.61279 | 39.12 | 212.3654 | 39.12 | 230.17155 | 39.12 | 156.28362 | 39.12 | 161.37645 |
| 39.14 | 144.2993 | 39.14 | 210.35669 | 39.14 | 229.08959 | 39.14 | 157.8216 | 39.14 | 163.98124 |
| 39.16 | 145.10774 | 39.16 | 207.30622 | 39.16 | 229.62095 | 39.16 | 157.44598 | 39.16 | 163.93124 |
| 39.18 | 143.82401 | 39.18 | 207.94968 | 39.18 | 230.3563 | 39.18 | 155.76513 | 39.18 | 166.70745 |
| 39.2 | 145.45392 | 39.2 | 205.30786 | 39.2 | 229.41497 | 39.2 | 155.8384 | 39.2 | 165.89845 |
| 39.22 | 143.11769 | 39.22 | 203.5281 | 39.22 | 228.53027 | 39.22 | 156.77408 | 39.22 | 165.84408 |
| 39.24 | 145.18757 | 39.24 | 199.50594 | 39.24 | 226.2316 | 39.24 | 160.62185 | 39.24 | 167.45606 |
| 39.26 | 147.29426 | 39.26 | 198.36851 | 39.26 | 225.81351 | 39.26 | 159.17033 | 39.26 | 167.19219 |
| 39.28 | 146.44844 | 39.28 | 195.11551 | 39.28 | 224.90259 | 39.28 | 157.8417 | 39.28 | 169.98634 |
| 39.3 | 147.55964 | 39.3 | 198.15146 | 39.3 | 224.50922 | 39.3 | 155.21895 | 39.3 | 167.96157 |
| 39.32 | 150.77601 | 39.32 | 199.21493 | 39.32 | 225.20364 | 39.32 | 155.47131 | 39.32 | 170.049 |
| 39.34 | 151.09936 | 39.34 | 200.48506 | 39.34 | 221.44554 | 39.34 | 157.64784 | 39.34 | 171.16154 |
| 39.36 | 150.91946 | 39.36 | 198.8244 | 39.36 | 218.86168 | 39.36 | 158.00647 | 39.36 | 171.81879 |
| 39.38 | 151.11859 | 39.38 | 200.93317 | 39.38 | 217.88845 | 39.38 | 159.2096 | 39.38 | 173.72408 |
| 39.4 | 153.95388 | 39.4 | 201.36354 | 39.4 | 217.90485 | 39.4 | 160.97466 | 39.4 | 174.74281 |
| 39.42 | 155.1136 | 39.42 | 203.39699 | 39.42 | 217.32217 | 39.42 | 158.3053 | 39.42 | 176.37367 |
| 39.44 | 155.74459 | 39.44 | 204.43306 | 39.44 | 214.381 | 39.44 | 156.52363 | 39.44 | 176.92788 |
| 39.46 | 157.91713 | 39.46 | 203.86152 | 39.46 | 214.73248 | 39.46 | 155.98852 | 39.46 | 177.66158 |
| 39.48 | 157.41391 | 39.48 | 202.54589 | 39.48 | 214.15357 | 39.48 | 156.90322 | 39.48 | 176.14759 |
| 39.5 | 157.3112 | 39.5 | 201.06513 | 39.5 | 210.55592 | 39.5 | 156.99251 | 39.5 | 176.2337 |
| 39.52 | 156.23095 | 39.52 | 202.41041 | 39.52 | 208.37884 | 39.52 | 155.20027 | 39.52 | 174.08133 |
| 39.54 | 155.56616 | 39.54 | 201.4521 | 39.54 | 207.61478 | 39.54 | 151.76852 | 39.54 | 173.19758 |
| 39.56 | 155.80509 | 39.56 | 201.30204 | 39.56 | 207.28332 | 39.56 | 151.77115 | 39.56 | 174.16704 |
| 39.58 | 157.47124 | 39.58 | 204.73888 | 39.58 | 203.50352 | 39.58 | 149.72522 | 39.58 | 174.14476 |
| 39.6 | 157.54767 | 39.6 | 206.13357 | 39.6 | 204.32232 | 39.6 | 151.9427 | 39.6 | 174.21497 |
| 39.62 | 157.55881 | 39.62 | 207.82842 | 39.62 | 203.77228 | 39.62 | 152.76509 | 39.62 | 170.61862 |
| 39.64 | 155.7377 | 39.64 | 209.90848 | 39.64 | 201.93286 | 39.64 | 151.98365 | 39.64 | 171.82231 |
| 39.66 | 153.84504 | 39.66 | 210.88829 | 39.66 | 202.19108 | 39.66 | 152.96536 | 39.66 | 172.20436 |
| 39.68 | 152.72609 | 39.68 | 210.47019 | 39.68 | 204.06051 | 39.68 | 150.65635 | 39.68 | 168.91606 |
| 39.7 | 151.85367 | 39.7 | 211.24956 | 39.7 | 201.97139 | 39.7 | 148.73746 | 39.7 | 168.72957 |
| 39.72 | 150.22111 | 39.72 | 211.06366 | 39.72 | 201.29208 | 39.72 | 146.80159 | 39.72 | 168.9476 |
| 39.74 | 149.37471 | 39.74 | 212.51857 | 39.74 | 201.63788 | 39.74 | 146.45805 | 39.74 | 167.28223 |
| 39.76 | 148.00322 | 39.76 | 213.25583 | 39.76 | 203.38027 | 39.76 | 145.19831 | 39.76 | 164.68251 |
| 39.78 | 144.58034 | 39.78 | 215.69756 | 39.78 | 205.56641 | 39.78 | 145.07939 | 39.78 | 165.22517 |
| 39.8 | 145.6119 | 39.8 | 216.95068 | 39.8 | 200.47116 | 39.8 | 143.73715 | 39.8 | 165.25311 |
| 39.82 | 141.93025 | 39.82 | 216.48391 | 39.82 | 201.72186 | 39.82 | 141.16026 | 39.82 | 163.91351 |
| 39.84 | 141.65995 | 39.84 | 215.21811 | 39.84 | 205.69251 | 39.84 | 142.96099 | 39.84 | 163.80743 |
| 39.86 | 140.13726 | 39.86 | 217.92769 | 39.86 | 209.56763 | 39.86 | 143.59142 | 39.86 | 164.94053 |
| 39.88 | 138.66081 | 39.88 | 216.03466 | 39.88 | 213.57868 | 39.88 | 144.41289 | 39.88 | 164.81935 |
| 39.9 | 136.73477 | 39.9 | 214.48159 | 39.9 | 215.33353 | 39.9 | 146.60585 | 39.9 | 163.8159 |
| 39.92 | 134.57355 | 39.92 | 217.43202 | 39.92 | 218.24169 | 39.92 | 147.41466 | 39.92 | 162.32417 |
| 39.94 | 136.4413 | 39.94 | 213.53122 | 39.94 | 220.37594 | 39.94 | 147.31275 | 39.94 | 162.70262 |
| 39.96 | 137.21405 | 39.96 | 213.83549 | 39.96 | 222.03018 | 39.96 | 146.12756 | 39.96 | 164.05409 |
| 39.98 | 140.40286 | 39.98 | 214.20996 | 39.98 | 226.44516 | 39.98 | 147.82692 | 39.98 | 164.71792 |
| 40 | 142.14561 | 40 | 212.24049 | 40 | 230.67779 | 40 | 149.27145 | 40 | 163.50122 |
| 40.02 | 141.09616 | 40.02 | 211.4028 | 40.02 | 233.92531 | 40.02 | 150.88135 | 40.02 | 162.79566 |
| 40.04 | 142.7355 | 40.04 | 215.20261 | 40.04 | 235.35871 | 40.04 | 152.09445 | 40.04 | 162.82698 |
| 40.06 | 141.64149 | 40.06 | 215.62298 | 40.06 | 238.39256 | 40.06 | 155.23062 | 40.06 | 160.84659 |
| 40.08 | 142.00957 | 40.08 | 217.01091 | 40.08 | 238.55565 | 40.08 | 154.25929 | 40.08 | 161.02798 |
| 40.1 | 142.82612 | 40.1 | 217.41315 | 40.1 | 239.07793 | 40.1 | 156.37656 | 40.1 | 161.51043 |
| 40.12 | 144.23743 | 40.12 | 214.63997 | 40.12 | 241.92209 | 40.12 | 157.97717 | 40.12 | 161.98704 |
| 40.14 | 143.05414 | 40.14 | 212.88494 | 40.14 | 242.92589 | 40.14 | 160.13238 | 40.14 | 163.75095 |
| 40.16 | 142.46315 | 40.16 | 213.52235 | 40.16 | 244.79607 | 40.16 | 158.79485 | 40.16 | 162.73999 |
| 40.18 | 140.59977 | 40.18 | 211.91472 | 40.18 | 242.57874 | 40.18 | 161.43083 | 40.18 | 162.34869 |
| 40.2 | 143.93468 | 40.2 | 210.96264 | 40.2 | 242.16575 | 40.2 | 162.5981 | 40.2 | 160.64196 |
| 40.22 | 146.907 | 40.22 | 212.68446 | 40.22 | 242.94305 | 40.22 | 163.06638 | 40.22 | 162.48875 |
| 40.24 | 149.94444 | 40.24 | 211.53477 | 40.24 | 242.36903 | 40.24 | 161.23563 | 40.24 | 161.14122 |
| 40.26 | 149.71191 | 40.26 | 213.06895 | 40.26 | 242.12006 | 40.26 | 158.32444 | 40.26 | 158.20325 |
| 40.28 | 151.36844 | 40.28 | 211.62989 | 40.28 | 239.25496 | 40.28 | 157.65662 | 40.28 | 160.33263 |
| 40.3 | 153.21766 | 40.3 | 214.27305 | 40.3 | 237.46215 | 40.3 | 158.13528 | 40.3 | 158.30615 |
| 40.32 | 154.20164 | 40.32 | 215.08848 | 40.32 | 235.1435 | 40.32 | 160.44697 | 40.32 | 158.21951 |
| 40.34 | 156.26626 | 40.34 | 215.98714 | 40.34 | 233.42944 | 40.34 | 160.15743 | 40.34 | 157.71989 |
| 40.36 | 157.84461 | 40.36 | 217.55004 | 40.36 | 231.53584 | 40.36 | 156.84459 | 40.36 | 158.76258 |
| 40.38 | 157.8788 | 40.38 | 217.48 | 40.38 | 227.99213 | 40.38 | 155.57294 | 40.38 | 157.47602 |
| 40.4 | 158.05945 | 40.4 | 216.73935 | 40.4 | 225.62836 | 40.4 | 155.69279 | 40.4 | 153.93593 |
| 40.42 | 157.17474 | 40.42 | 215.45561 | 40.42 | 224.05244 | 40.42 | 152.69781 | 40.42 | 154.05788 |
| 40.44 | 157.84577 | 40.44 | 213.51202 | 40.44 | 221.67376 | 40.44 | 154.091 | 40.44 | 152.88419 |
| 40.46 | 156.48353 | 40.46 | 212.30343 | 40.46 | 219.80038 | 40.46 | 154.44133 | 40.46 | 150.8813 |
| 40.48 | 157.35917 | 40.48 | 210.25034 | 40.48 | 214.23492 | 40.48 | 156.60692 | 40.48 | 148.50998 |
| 40.5 | 155.35609 | 40.5 | 209.17293 | 40.5 | 211.62578 | 40.5 | 156.18486 | 40.5 | 146.4786 |
| 40.52 | 155.0824 | 40.52 | 210.80262 | 40.52 | 210.5967 | 40.52 | 155.90378 | 40.52 | 145.14977 |
| 40.54 | 157.23345 | 40.54 | 207.0224 | 40.54 | 206.6083 | 40.54 | 155.65856 | 40.54 | 143.68371 |
| 40.56 | 158.43354 | 40.56 | 205.66299 | 40.56 | 204.87155 | 40.56 | 153.99355 | 40.56 | 142.96456 |
| 40.58 | 158.74595 | 40.58 | 206.82627 | 40.58 | 199.88484 | 40.58 | 152.2774 | 40.58 | 141.98944 |
| 40.6 | 154.1177 | 40.6 | 203.77336 | 40.6 | 199.25306 | 40.6 | 152.09884 | 40.6 | 141.24859 |
| 40.62 | 153.66676 | 40.62 | 204.08123 | 40.62 | 197.3859 | 40.62 | 150.0114 | 40.62 | 141.99626 |
| 40.64 | 154.2019 | 40.64 | 202.28012 | 40.64 | 196.4312 | 40.64 | 149.42401 | 40.64 | 144.02181 |
| 40.66 | 153.66791 | 40.66 | 198.12431 | 40.66 | 195.24412 | 40.66 | 150.11089 | 40.66 | 141.75923 |
| 40.68 | 154.43087 | 40.68 | 195.44097 | 40.68 | 192.23405 | 40.68 | 149.76358 | 40.68 | 141.00404 |
| 40.7 | 153.32949 | 40.7 | 193.48473 | 40.7 | 189.22114 | 40.7 | 152.39633 | 40.7 | 143.54884 |
| 40.72 | 152.79473 | 40.72 | 193.01963 | 40.72 | 189.64622 | 40.72 | 152.12866 | 40.72 | 143.63701 |
| 40.74 | 151.38361 | 40.74 | 193.62381 | 40.74 | 190.50184 | 40.74 | 151.53975 | 40.74 | 140.46197 |
| 40.76 | 150.99573 | 40.76 | 191.09259 | 40.76 | 193.33695 | 40.76 | 151.1698 | 40.76 | 142.0394 |
| 40.78 | 150.80075 | 40.78 | 186.79521 | 40.78 | 190.93374 | 40.78 | 150.47857 | 40.78 | 144.49397 |
| 40.8 | 149.35433 | 40.8 | 187.23048 | 40.8 | 190.44771 | 40.8 | 150.76472 | 40.8 | 145.44115 |
| 40.82 | 145.84992 | 40.82 | 186.98755 | 40.82 | 193.08367 | 40.82 | 151.5862 | 40.82 | 144.71274 |
| 40.84 | 147.7537 | 40.84 | 185.8114 | 40.84 | 194.21923 | 40.84 | 154.74124 | 40.84 | 145.79393 |
| 40.86 | 146.90431 | 40.86 | 185.87048 | 40.86 | 193.08481 | 40.86 | 155.80129 | 40.86 | 147.83192 |
| 40.88 | 144.07337 | 40.88 | 182.13332 | 40.88 | 194.74699 | 40.88 | 156.32208 | 40.88 | 147.52103 |
| 40.9 | 144.05035 | 40.9 | 181.49081 | 40.9 | 195.35798 | 40.9 | 155.22129 | 40.9 | 150.12604 |
| 40.92 | 141.70752 | 40.92 | 183.72281 | 40.92 | 195.53937 | 40.92 | 157.21398 | 40.92 | 148.71963 |
| 40.94 | 142.23206 | 40.94 | 179.25801 | 40.94 | 198.07169 | 40.94 | 159.03189 | 40.94 | 149.04031 |
| 40.96 | 141.11593 | 40.96 | 185.36099 | 40.96 | 197.91845 | 40.96 | 159.67272 | 40.96 | 149.05107 |
| 40.98 | 138.95129 | 40.98 | 185.42194 | 40.98 | 202.58277 | 40.98 | 161.45252 | 40.98 | 148.58316 |
| 41 | 135.22167 | 41 | 186.84781 | 41 | 204.62812 | 41 | 161.37813 | 41 | 149.9156 |
| 41.02 | 135.25622 | 41.02 | 187.996 | 41.02 | 206.08231 | 41.02 | 161.3436 | 41.02 | 149.63001 |
| 41.04 | 133.96454 | 41.04 | 187.68473 | 41.04 | 206.20933 | 41.04 | 161.66145 | 41.04 | 150.30687 |
| 41.06 | 131.76498 | 41.06 | 188.39633 | 41.06 | 205.86391 | 41.06 | 161.98216 | 41.06 | 149.56526 |
| 41.08 | 131.53754 | 41.08 | 188.78028 | 41.08 | 206.17591 | 41.08 | 161.1271 | 41.08 | 149.2589 |
| 41.1 | 129.2774 | 41.1 | 183.83622 | 41.1 | 206.28315 | 41.1 | 161.76926 | 41.1 | 150.46256 |
| 41.12 | 129.00993 | 41.12 | 184.91626 | 41.12 | 208.39079 | 41.12 | 161.72207 | 41.12 | 152.84314 |
| 41.14 | 129.39028 | 41.14 | 185.24998 | 41.14 | 204.68497 | 41.14 | 161.33324 | 41.14 | 152.57341 |
| 41.16 | 129.22172 | 41.16 | 186.15468 | 41.16 | 205.00282 | 41.16 | 157.74653 | 41.16 | 151.21833 |
| 41.18 | 129.4922 | 41.18 | 187.41539 | 41.18 | 203.65946 | 41.18 | 157.22934 | 41.18 | 150.33342 |
| 41.2 | 133.47814 | 41.2 | 190.09196 | 41.2 | 200.67902 | 41.2 | 155.03467 | 41.2 | 151.77571 |
| 41.22 | 132.30598 | 41.22 | 191.55954 | 41.22 | 199.44835 | 41.22 | 152.52933 | 41.22 | 151.81365 |
| 41.24 | 132.15213 | 41.24 | 193.10186 | 41.24 | 198.35735 | 41.24 | 152.87266 | 41.24 | 150.34343 |
| 41.26 | 132.9685 | 41.26 | 196.38959 | 41.26 | 198.79658 | 41.26 | 153.93006 | 41.26 | 150.76322 |
| 41.28 | 133.84715 | 41.28 | 198.89987 | 41.28 | 200.22018 | 41.28 | 154.55674 | 41.28 | 150.80323 |
| 41.3 | 133.14741 | 41.3 | 201.06547 | 41.3 | 202.58375 | 41.3 | 154.8397 | 41.3 | 150.43909 |
| 41.32 | 131.67586 | 41.32 | 201.63779 | 41.32 | 200.41007 | 41.32 | 155.3267 | 41.32 | 150.37738 |
| 41.34 | 132.51808 | 41.34 | 203.78563 | 41.34 | 198.54025 | 41.34 | 155.93091 | 41.34 | 151.39511 |
| 41.36 | 131.67435 | 41.36 | 205.92536 | 41.36 | 199.26957 | 41.36 | 155.80518 | 41.36 | 151.08386 |
| 41.38 | 131.72134 | 41.38 | 203.24373 | 41.38 | 202.25925 | 41.38 | 158.10215 | 41.38 | 150.71975 |
| 41.4 | 132.57961 | 41.4 | 202.10441 | 41.4 | 204.12981 | 41.4 | 157.03946 | 41.4 | 152.43742 |
| 41.42 | 132.8729 | 41.42 | 202.86245 | 41.42 | 204.96825 | 41.42 | 154.31533 | 41.42 | 152.99423 |
| 41.44 | 133.72795 | 41.44 | 204.07294 | 41.44 | 200.56084 | 41.44 | 154.75985 | 41.44 | 151.13594 |
| 41.46 | 134.0643 | 41.46 | 204.2466 | 41.46 | 200.46004 | 41.46 | 151.58952 | 41.46 | 150.76163 |
| 41.48 | 135.20814 | 41.48 | 204.51199 | 41.48 | 201.32075 | 41.48 | 153.8925 | 41.48 | 151.46983 |
| 41.5 | 134.99863 | 41.5 | 205.87387 | 41.5 | 203.90519 | 41.5 | 152.93907 | 41.5 | 153.58257 |
| 41.52 | 137.50736 | 41.52 | 204.89706 | 41.52 | 206.87599 | 41.52 | 148.20583 | 41.52 | 153.94045 |
| 41.54 | 140.06329 | 41.54 | 202.7596 | 41.54 | 206.93127 | 41.54 | 147.45836 | 41.54 | 154.92819 |
| 41.56 | 138.6261 | 41.56 | 203.82514 | 41.56 | 208.8811 | 41.56 | 147.15579 | 41.56 | 156.82158 |
| 41.58 | 139.30583 | 41.58 | 203.0271 | 41.58 | 208.30613 | 41.58 | 149.63661 | 41.58 | 158.28142 |
| 41.6 | 136.71007 | 41.6 | 201.69166 | 41.6 | 212.38378 | 41.6 | 150.05262 | 41.6 | 157.12492 |
| 41.62 | 138.77503 | 41.62 | 202.39553 | 41.62 | 212.82132 | 41.62 | 151.48961 | 41.62 | 159.86167 |
| 41.64 | 138.41774 | 41.64 | 200.25487 | 41.64 | 212.74129 | 41.64 | 152.48642 | 41.64 | 157.82501 |
| 41.66 | 138.41245 | 41.66 | 199.73521 | 41.66 | 212.85019 | 41.66 | 152.46602 | 41.66 | 157.66324 |
| 41.68 | 139.97967 | 41.68 | 200.46324 | 41.68 | 213.53819 | 41.68 | 153.11176 | 41.68 | 157.81875 |
| 41.7 | 138.90886 | 41.7 | 201.32357 | 41.7 | 213.44401 | 41.7 | 154.11669 | 41.7 | 157.76816 |
| 41.72 | 142.63431 | 41.72 | 201.44342 | 41.72 | 212.35678 | 41.72 | 148.75304 | 41.72 | 156.99501 |
| 41.74 | 144.32821 | 41.74 | 201.05422 | 41.74 | 213.31715 | 41.74 | 147.46877 | 41.74 | 157.65961 |
| 41.76 | 144.18117 | 41.76 | 196.0324 | 41.76 | 213.74599 | 41.76 | 145.45986 | 41.76 | 160.35218 |
| 41.78 | 143.73006 | 41.78 | 195.28474 | 41.78 | 213.09743 | 41.78 | 143.45338 | 41.78 | 158.73191 |
| 41.8 | 142.956 | 41.8 | 194.50499 | 41.8 | 212.18911 | 41.8 | 144.86585 | 41.8 | 159.25647 |
| 41.82 | 143.11116 | 41.82 | 193.13104 | 41.82 | 213.43884 | 41.82 | 143.80732 | 41.82 | 160.0921 |
| 41.84 | 144.05474 | 41.84 | 189.3516 | 41.84 | 214.06986 | 41.84 | 146.30284 | 41.84 | 161.26127 |
| 41.86 | 144.10665 | 41.86 | 186.83683 | 41.86 | 214.6667 | 41.86 | 146.44952 | 41.86 | 161.61347 |
| 41.88 | 146.43324 | 41.88 | 183.31315 | 41.88 | 218.79401 | 41.88 | 145.33153 | 41.88 | 160.02209 |
| 41.9 | 148.9905 | 41.9 | 185.65466 | 41.9 | 218.58053 | 41.9 | 145.72189 | 41.9 | 157.25663 |
| 41.92 | 150.40406 | 41.92 | 187.22244 | 41.92 | 220.26761 | 41.92 | 145.43593 | 41.92 | 154.40625 |
| 41.94 | 152.19647 | 41.94 | 187.79663 | 41.94 | 219.43219 | 41.94 | 143.3451 | 41.94 | 155.97521 |
| 41.96 | 152.7195 | 41.96 | 189.37744 | 41.96 | 216.57371 | 41.96 | 140.53529 | 41.96 | 158.62836 |
| 41.98 | 152.45771 | 41.98 | 186.91855 | 41.98 | 218.71795 | 41.98 | 140.22706 | 41.98 | 158.03529 |
| 42 | 154.14707 | 42 | 187.5286 | 42 | 217.616 | 42 | 142.15537 | 42 | 158.03264 |
| 42.02 | 155.23091 | 42.02 | 185.6822 | 42.02 | 213.33033 | 42.02 | 142.39491 | 42.02 | 155.05201 |
| 42.04 | 153.27259 | 42.04 | 183.75843 | 42.04 | 213.17499 | 42.04 | 143.13407 | 42.04 | 154.99634 |
| 42.06 | 156.65738 | 42.06 | 184.23261 | 42.06 | 212.98568 | 42.06 | 144.27849 | 42.06 | 153.95839 |
| 42.08 | 158.11345 | 42.08 | 182.32279 | 42.08 | 214.20354 | 42.08 | 146.0558 | 42.08 | 152.86664 |
| 42.1 | 159.63671 | 42.1 | 181.64175 | 42.1 | 212.25921 | 42.1 | 146.68286 | 42.1 | 153.08277 |
| 42.12 | 161.37156 | 42.12 | 183.11857 | 42.12 | 213.55842 | 42.12 | 145.59373 | 42.12 | 153.47821 |
| 42.14 | 162.97221 | 42.14 | 183.75092 | 42.14 | 212.81965 | 42.14 | 144.12954 | 42.14 | 151.2556 |
| 42.16 | 163.70591 | 42.16 | 187.14796 | 42.16 | 214.35704 | 42.16 | 143.83095 | 42.16 | 152.88946 |
| 42.18 | 165.31334 | 42.18 | 187.20404 | 42.18 | 214.8131 | 42.18 | 145.72642 | 42.18 | 153.44083 |
| 42.2 | 166.54214 | 42.2 | 186.60531 | 42.2 | 214.75931 | 42.2 | 148.22723 | 42.2 | 156.00847 |
| 42.22 | 164.70991 | 42.22 | 185.42559 | 42.22 | 219.10578 | 42.22 | 149.72972 | 42.22 | 155.49411 |
| 42.24 | 166.95324 | 42.24 | 185.84579 | 42.24 | 222.24966 | 42.24 | 152.08595 | 42.24 | 157.01244 |
| 42.26 | 165.31203 | 42.26 | 185.04095 | 42.26 | 222.24344 | 42.26 | 152.65809 | 42.26 | 156.73063 |
| 42.28 | 164.41808 | 42.28 | 186.57384 | 42.28 | 223.49149 | 42.28 | 152.82796 | 42.28 | 157.56604 |
| 42.3 | 164.03811 | 42.3 | 185.63119 | 42.3 | 221.86839 | 42.3 | 153.57977 | 42.3 | 159.59818 |
| 42.32 | 163.5968 | 42.32 | 183.82612 | 42.32 | 219.59559 | 42.32 | 152.45874 | 42.32 | 160.40738 |
| 42.34 | 164.53529 | 42.34 | 185.698 | 42.34 | 223.00129 | 42.34 | 153.61598 | 42.34 | 162.58353 |
| 42.36 | 165.11099 | 42.36 | 186.27239 | 42.36 | 226.93777 | 42.36 | 153.10746 | 42.36 | 162.62149 |
| 42.38 | 165.97111 | 42.38 | 183.61603 | 42.38 | 226.51251 | 42.38 | 151.30145 | 42.38 | 161.44837 |
| 42.4 | 165.64323 | 42.4 | 182.05426 | 42.4 | 225.31958 | 42.4 | 149.27271 | 42.4 | 161.95914 |
| 42.42 | 166.09187 | 42.42 | 182.37912 | 42.42 | 222.68363 | 42.42 | 147.2081 | 42.42 | 160.69241 |
| 42.44 | 166.11473 | 42.44 | 184.15927 | 42.44 | 219.71433 | 42.44 | 148.24701 | 42.44 | 162.73153 |
| 42.46 | 168.39602 | 42.46 | 181.62674 | 42.46 | 224.15724 | 42.46 | 146.99346 | 42.46 | 164.647 |
| 42.48 | 165.32383 | 42.48 | 182.26586 | 42.48 | 224.6027 | 42.48 | 148.55899 | 42.48 | 164.92958 |
| 42.5 | 162.8974 | 42.5 | 182.0937 | 42.5 | 227.26601 | 42.5 | 147.21071 | 42.5 | 164.56717 |
| 42.52 | 161.5712 | 42.52 | 181.83926 | 42.52 | 225.8947 | 42.52 | 145.55854 | 42.52 | 161.90969 |
| 42.54 | 160.91942 | 42.54 | 183.68717 | 42.54 | 225.96982 | 42.54 | 146.90494 | 42.54 | 162.97086 |
| 42.56 | 157.88763 | 42.56 | 184.86821 | 42.56 | 224.7665 | 42.56 | 147.99426 | 42.56 | 162.62107 |
| 42.58 | 159.32369 | 42.58 | 184.13187 | 42.58 | 224.68626 | 42.58 | 147.96068 | 42.58 | 162.11843 |
| 42.6 | 157.05107 | 42.6 | 185.15208 | 42.6 | 224.4843 | 42.6 | 146.14202 | 42.6 | 162.21015 |
| 42.62 | 158.01636 | 42.62 | 187.07038 | 42.62 | 222.00916 | 42.62 | 144.19766 | 42.62 | 161.72013 |
| 42.64 | 156.27265 | 42.64 | 185.90766 | 42.64 | 220.92173 | 42.64 | 141.94241 | 42.64 | 159.62364 |
| 42.66 | 158.79969 | 42.66 | 184.51992 | 42.66 | 220.11971 | 42.66 | 140.96315 | 42.66 | 158.86936 |
| 42.68 | 159.42825 | 42.68 | 185.74079 | 42.68 | 217.96431 | 42.68 | 139.95181 | 42.68 | 157.91105 |
| 42.7 | 159.27763 | 42.7 | 186.2476 | 42.7 | 214.28361 | 42.7 | 136.83813 | 42.7 | 157.86426 |
| 42.72 | 159.03624 | 42.72 | 187.21837 | 42.72 | 211.07383 | 42.72 | 135.29733 | 42.72 | 157.68041 |
| 42.74 | 157.4811 | 42.74 | 188.64932 | 42.74 | 211.51871 | 42.74 | 135.61254 | 42.74 | 155.72078 |
| 42.76 | 157.26837 | 42.76 | 189.3843 | 42.76 | 211.0691 | 42.76 | 134.85941 | 42.76 | 155.31119 |
| 42.78 | 157.53452 | 42.78 | 191.58234 | 42.78 | 210.05965 | 42.78 | 136.21242 | 42.78 | 152.94969 |
| 42.8 | 156.90898 | 42.8 | 191.4419 | 42.8 | 209.25629 | 42.8 | 137.46688 | 42.8 | 153.91082 |
| 42.82 | 158.96395 | 42.82 | 192.62199 | 42.82 | 211.22333 | 42.82 | 137.97898 | 42.82 | 151.2505 |
| 42.84 | 158.99376 | 42.84 | 193.30243 | 42.84 | 207.6923 | 42.84 | 138.51656 | 42.84 | 147.97258 |
| 42.86 | 162.32074 | 42.86 | 195.08522 | 42.86 | 207.33365 | 42.86 | 138.00485 | 42.86 | 147.19206 |
| 42.88 | 162.43361 | 42.88 | 198.07601 | 42.88 | 209.99377 | 42.88 | 137.35932 | 42.88 | 144.04572 |
| 42.9 | 160.39978 | 42.9 | 201.80163 | 42.9 | 205.32472 | 42.9 | 136.52107 | 42.9 | 141.27518 |
| 42.92 | 157.78231 | 42.92 | 201.26953 | 42.92 | 203.16613 | 42.92 | 134.91854 | 42.92 | 142.95587 |
| 42.94 | 156.36251 | 42.94 | 201.24858 | 42.94 | 201.52907 | 42.94 | 136.23831 | 42.94 | 141.63666 |
| 42.96 | 155.32624 | 42.96 | 198.21472 | 42.96 | 200.49489 | 42.96 | 136.2387 | 42.96 | 142.26974 |
| 42.98 | 155.38759 | 42.98 | 199.89105 | 42.98 | 200.11227 | 42.98 | 140.22937 | 42.98 | 139.61434 |
| 43 | 154.95402 | 43 | 198.68565 | 43 | 199.77858 | 43 | 142.16353 | 43 | 137.84214 |
| 43.02 | 154.54197 | 43.02 | 197.61732 | 43.02 | 197.24985 | 43.02 | 142.06517 | 43.02 | 136.68489 |
| 43.04 | 154.89873 | 43.04 | 196.8504 | 43.04 | 199.38205 | 43.04 | 143.15504 | 43.04 | 137.67453 |
| 43.06 | 155.36779 | 43.06 | 197.112 | 43.06 | 198.332 | 43.06 | 143.74245 | 43.06 | 136.25171 |
| 43.08 | 154.87815 | 43.08 | 199.14752 | 43.08 | 197.72195 | 43.08 | 143.9569 | 43.08 | 135.89421 |
| 43.1 | 156.26926 | 43.1 | 199.38497 | 43.1 | 196.93975 | 43.1 | 143.03804 | 43.1 | 134.47118 |
| 43.12 | 155.74905 | 43.12 | 198.16693 | 43.12 | 198.57342 | 43.12 | 143.34439 | 43.12 | 136.06559 |
| 43.14 | 155.70789 | 43.14 | 198.14071 | 43.14 | 199.08231 | 43.14 | 144.13811 | 43.14 | 133.49267 |
| 43.16 | 154.60518 | 43.16 | 195.40094 | 43.16 | 200.37923 | 43.16 | 145.6693 | 43.16 | 135.0584 |
| 43.18 | 152.71669 | 43.18 | 192.59246 | 43.18 | 201.47137 | 43.18 | 146.06038 | 43.18 | 134.19202 |
| 43.2 | 152.18459 | 43.2 | 192.4475 | 43.2 | 197.65117 | 43.2 | 144.60111 | 43.2 | 132.88054 |
| 43.22 | 149.30552 | 43.22 | 193.09776 | 43.22 | 198.25122 | 43.22 | 144.40649 | 43.22 | 132.46887 |
| 43.24 | 147.72959 | 43.24 | 193.74236 | 43.24 | 196.96902 | 43.24 | 142.91796 | 43.24 | 135.03045 |
| 43.26 | 145.61612 | 43.26 | 193.40655 | 43.26 | 195.23645 | 43.26 | 143.39493 | 43.26 | 135.15446 |
| 43.28 | 145.40301 | 43.28 | 194.80408 | 43.28 | 194.25077 | 43.28 | 142.47418 | 43.28 | 136.21166 |
| 43.3 | 144.07152 | 43.3 | 192.8867 | 43.3 | 188.98978 | 43.3 | 141.8188 | 43.3 | 136.08991 |
| 43.32 | 142.16376 | 43.32 | 192.0962 | 43.32 | 191.4347 | 43.32 | 140.44088 | 43.32 | 135.80281 |
| 43.34 | 143.46824 | 43.34 | 192.67699 | 43.34 | 192.95587 | 43.34 | 142.12326 | 43.34 | 135.15594 |
| 43.36 | 142.81476 | 43.36 | 191.79684 | 43.36 | 189.85558 | 43.36 | 140.60962 | 43.36 | 132.44729 |
| 43.38 | 142.71753 | 43.38 | 188.23467 | 43.38 | 188.19379 | 43.38 | 137.86078 | 43.38 | 133.34102 |
| 43.4 | 141.19899 | 43.4 | 188.32621 | 43.4 | 189.83502 | 43.4 | 137.0548 | 43.4 | 136.78486 |
| 43.42 | 140.32374 | 43.42 | 188.53876 | 43.42 | 189.60719 | 43.42 | 136.00134 | 43.42 | 138.50404 |
| 43.44 | 137.73328 | 43.44 | 189.18184 | 43.44 | 190.53528 | 43.44 | 135.60514 | 43.44 | 139.05388 |
| 43.46 | 137.48243 | 43.46 | 187.33638 | 43.46 | 191.17495 | 43.46 | 135.89754 | 43.46 | 139.54992 |
| 43.48 | 134.19903 | 43.48 | 188.29526 | 43.48 | 190.72344 | 43.48 | 136.24958 | 43.48 | 138.77302 |
| 43.5 | 136.25779 | 43.5 | 185.07189 | 43.5 | 193.09494 | 43.5 | 135.70521 | 43.5 | 137.89796 |
| 43.52 | 138.17083 | 43.52 | 183.74136 | 43.52 | 191.52431 | 43.52 | 133.50415 | 43.52 | 138.22525 |
| 43.54 | 137.67987 | 43.54 | 182.26907 | 43.54 | 193.82542 | 43.54 | 133.2535 | 43.54 | 139.85873 |
| 43.56 | 136.53885 | 43.56 | 179.63217 | 43.56 | 191.87556 | 43.56 | 134.68692 | 43.56 | 137.40245 |
| 43.58 | 138.31807 | 43.58 | 178.54249 | 43.58 | 192.06243 | 43.58 | 132.75616 | 43.58 | 136.08042 |
| 43.6 | 135.09811 | 43.6 | 177.80711 | 43.6 | 190.5256 | 43.6 | 130.28046 | 43.6 | 134.72704 |
| 43.62 | 134.46523 | 43.62 | 176.74763 | 43.62 | 188.11973 | 43.62 | 127.68168 | 43.62 | 132.82212 |
| 43.64 | 134.85068 | 43.64 | 172.69489 | 43.64 | 187.24579 | 43.64 | 129.86557 | 43.64 | 132.24324 |
| 43.66 | 136.63406 | 43.66 | 172.22716 | 43.66 | 186.28314 | 43.66 | 131.91149 | 43.66 | 131.55844 |
| 43.68 | 136.22145 | 43.68 | 173.4856 | 43.68 | 183.13772 | 43.68 | 132.36018 | 43.68 | 131.92011 |
| 43.7 | 135.34809 | 43.7 | 172.85574 | 43.7 | 183.03164 | 43.7 | 133.57956 | 43.7 | 130.07806 |
| 43.72 | 133.76822 | 43.72 | 173.3733 | 43.72 | 184.39803 | 43.72 | 135.53089 | 43.72 | 131.85348 |
| 43.74 | 133.91281 | 43.74 | 172.12846 | 43.74 | 189.63673 | 43.74 | 135.40255 | 43.74 | 132.19247 |
| 43.76 | 133.85429 | 43.76 | 169.31373 | 43.76 | 191.14168 | 43.76 | 136.14703 | 43.76 | 134.51208 |
| 43.78 | 132.86938 | 43.78 | 169.96251 | 43.78 | 190.8776 | 43.78 | 137.54985 | 43.78 | 132.11396 |
| 43.8 | 132.13853 | 43.8 | 170.18071 | 43.8 | 189.3385 | 43.8 | 138.05174 | 43.8 | 130.88421 |
| 43.82 | 132.65156 | 43.82 | 169.97967 | 43.82 | 187.42339 | 43.82 | 138.12292 | 43.82 | 130.56199 |
| 43.84 | 130.56449 | 43.84 | 169.46511 | 43.84 | 186.97433 | 43.84 | 137.79656 | 43.84 | 131.68376 |
| 43.86 | 131.16076 | 43.86 | 168.74086 | 43.86 | 188.45586 | 43.86 | 137.21898 | 43.86 | 132.68267 |
| 43.88 | 128.85191 | 43.88 | 166.33633 | 43.88 | 189.17314 | 43.88 | 135.55038 | 43.88 | 133.32181 |
| 43.9 | 127.12688 | 43.9 | 165.32216 | 43.9 | 185.8756 | 43.9 | 134.11322 | 43.9 | 133.42922 |
| 43.92 | 126.62403 | 43.92 | 161.66921 | 43.92 | 187.81638 | 43.92 | 135.06078 | 43.92 | 134.4685 |
| 43.94 | 127.45094 | 43.94 | 160.74583 | 43.94 | 189.79774 | 43.94 | 137.14822 | 43.94 | 133.39279 |
| 43.96 | 125.61415 | 43.96 | 159.55706 | 43.96 | 187.26918 | 43.96 | 136.88114 | 43.96 | 136.91119 |
| 43.98 | 126.33219 | 43.98 | 160.31566 | 43.98 | 185.63231 | 43.98 | 136.00587 | 43.98 | 135.59671 |
| 44 | 122.51086 | 44 | 159.7679 | 44 | 183.0781 | 44 | 134.31538 | 44 | 135.65561 |
| 44.02 | 122.86308 | 44.02 | 159.83964 | 44.02 | 183.25987 | 44.02 | 134.38445 | 44.02 | 136.78266 |
| 44.04 | 123.41538 | 44.04 | 159.65239 | 44.04 | 185.20987 | 44.04 | 133.3882 | 44.04 | 136.37496 |
| 44.06 | 123.00239 | 44.06 | 160.71754 | 44.06 | 185.01225 | 44.06 | 133.60755 | 44.06 | 135.80305 |
| 44.08 | 121.59843 | 44.08 | 162.46183 | 44.08 | 183.62737 | 44.08 | 133.86953 | 44.08 | 136.33041 |
| 44.1 | 122.10221 | 44.1 | 160.45857 | 44.1 | 184.19647 | 44.1 | 133.63961 | 44.1 | 138.38047 |
| 44.12 | 121.48327 | 44.12 | 158.95702 | 44.12 | 185.64857 | 44.12 | 132.40005 | 44.12 | 140.61401 |
| 44.14 | 118.80748 | 44.14 | 160.65828 | 44.14 | 184.45791 | 44.14 | 131.08309 | 44.14 | 140.28613 |
| 44.16 | 117.30481 | 44.16 | 162.76005 | 44.16 | 183.77461 | 44.16 | 131.28693 | 44.16 | 142.85416 |
| 44.18 | 116.03732 | 44.18 | 164.0364 | 44.18 | 180.89762 | 44.18 | 129.05489 | 44.18 | 142.87586 |
| 44.2 | 115.81534 | 44.2 | 162.83043 | 44.2 | 178.91059 | 44.2 | 128.31423 | 44.2 | 144.71318 |
| 44.22 | 114.97765 | 44.22 | 163.22511 | 44.22 | 179.13086 | 44.22 | 128.44901 | 44.22 | 146.97368 |
| 44.24 | 115.4482 | 44.24 | 162.97462 | 44.24 | 178.74484 | 44.24 | 128.21249 | 44.24 | 148.17246 |
| 44.26 | 115.75512 | 44.26 | 164.52635 | 44.26 | 176.31518 | 44.26 | 127.83043 | 44.26 | 147.17355 |
| 44.28 | 115.19564 | 44.28 | 164.94857 | 44.28 | 172.76337 | 44.28 | 128.46276 | 44.28 | 145.3532 |
| 44.3 | 113.84925 | 44.3 | 163.00023 | 44.3 | 171.41377 | 44.3 | 127.68791 | 44.3 | 145.08666 |
| 44.32 | 114.21883 | 44.32 | 160.83841 | 44.32 | 174.5235 | 44.32 | 127.81116 | 44.32 | 145.76184 |
| 44.34 | 114.70809 | 44.34 | 161.3805 | 44.34 | 174.21017 | 44.34 | 127.85401 | 44.34 | 145.8194 |
| 44.36 | 112.32015 | 44.36 | 160.60681 | 44.36 | 172.27903 | 44.36 | 126.59538 | 44.36 | 144.55473 |
| 44.38 | 112.39904 | 44.38 | 158.64488 | 44.38 | 170.86885 | 44.38 | 125.23577 | 44.38 | 144.66892 |
| 44.4 | 112.25861 | 44.4 | 157.8219 | 44.4 | 170.6529 | 44.4 | 127.48422 | 44.4 | 144.67648 |
| 44.42 | 112.23899 | 44.42 | 155.48492 | 44.42 | 170.28388 | 44.42 | 128.56824 | 44.42 | 140.82399 |
| 44.44 | 114.4748 | 44.44 | 155.85883 | 44.44 | 171.16177 | 44.44 | 127.21923 | 44.44 | 137.83959 |
| 44.46 | 116.73704 | 44.46 | 154.84445 | 44.46 | 173.60672 | 44.46 | 129.38651 | 44.46 | 136.07832 |
| 44.48 | 115.73494 | 44.48 | 151.50763 | 44.48 | 176.64965 | 44.48 | 126.75677 | 44.48 | 131.96799 |
| 44.5 | 117.0383 | 44.5 | 150.97612 | 44.5 | 178.31354 | 44.5 | 123.54228 | 44.5 | 128.71044 |
| 44.52 | 117.32821 | 44.52 | 149.81283 | 44.52 | 179.39945 | 44.52 | 122.20326 | 44.52 | 127.76684 |
| 44.54 | 118.02528 | 44.54 | 148.4842 | 44.54 | 179.05459 | 44.54 | 123.34995 | 44.54 | 125.77208 |
| 44.56 | 119.71408 | 44.56 | 147.92815 | 44.56 | 176.75366 | 44.56 | 122.46678 | 44.56 | 121.8807 |
| 44.58 | 121.48104 | 44.58 | 145.21838 | 44.58 | 176.81029 | 44.58 | 121.3701 | 44.58 | 122.5172 |
| 44.6 | 122.86538 | 44.6 | 143.42182 | 44.6 | 177.77765 | 44.6 | 122.09642 | 44.6 | 123.88378 |
| 44.62 | 125.64103 | 44.62 | 142.41782 | 44.62 | 177.44545 | 44.62 | 122.30594 | 44.62 | 123.19126 |
| 44.64 | 128.38929 | 44.64 | 141.63866 | 44.64 | 180.21298 | 44.64 | 126.89004 | 44.64 | 122.90191 |
| 44.66 | 127.30867 | 44.66 | 140.5371 | 44.66 | 180.76755 | 44.66 | 126.51065 | 44.66 | 123.51157 |
| 44.68 | 129.83911 | 44.68 | 141.66794 | 44.68 | 179.70319 | 44.68 | 126.82265 | 44.68 | 123.50532 |
| 44.7 | 129.1509 | 44.7 | 139.26319 | 44.7 | 181.90371 | 44.7 | 130.09018 | 44.7 | 123.10894 |
| 44.72 | 129.36192 | 44.72 | 139.97121 | 44.72 | 181.70118 | 44.72 | 129.27097 | 44.72 | 124.97536 |
| 44.74 | 131.05675 | 44.74 | 139.22073 | 44.74 | 182.64154 | 44.74 | 129.37272 | 44.74 | 122.30807 |
| 44.76 | 130.10296 | 44.76 | 140.52256 | 44.76 | 180.15548 | 44.76 | 129.53505 | 44.76 | 121.60911 |
| 44.78 | 130.27775 | 44.78 | 143.58097 | 44.78 | 179.06542 | 44.78 | 129.14016 | 44.78 | 119.96844 |
| 44.8 | 130.79267 | 44.8 | 142.94997 | 44.8 | 180.02791 | 44.8 | 128.13618 | 44.8 | 120.6436 |
| 44.82 | 132.89821 | 44.82 | 141.9628 | 44.82 | 178.24455 | 44.82 | 128.06938 | 44.82 | 121.76632 |
| 44.84 | 132.7929 | 44.84 | 141.63288 | 44.84 | 179.49827 | 44.84 | 127.04009 | 44.84 | 122.89831 |
| 44.86 | 133.02771 | 44.86 | 141.32729 | 44.86 | 179.27857 | 44.86 | 126.42266 | 44.86 | 123.5031 |
| 44.88 | 132.4909 | 44.88 | 139.88976 | 44.88 | 179.94204 | 44.88 | 128.30927 | 44.88 | 124.19658 |
| 44.9 | 132.01466 | 44.9 | 142.48098 | 44.9 | 181.66255 | 44.9 | 128.26058 | 44.9 | 123.00857 |
| 44.92 | 133.78367 | 44.92 | 145.88536 | 44.92 | 183.22469 | 44.92 | 129.28098 | 44.92 | 125.113 |
| 44.94 | 132.62018 | 44.94 | 151.07028 | 44.94 | 183.92571 | 44.94 | 129.36532 | 44.94 | 128.59723 |
| 44.96 | 131.78741 | 44.96 | 153.64262 | 44.96 | 180.86883 | 44.96 | 127.92909 | 44.96 | 131.55806 |
| 44.98 | 130.41235 | 44.98 | 156.05907 | 44.98 | 180.10325 | 44.98 | 125.28292 | 44.98 | 130.86176 |
| 45 | 130.48333 | 45 | 159.34623 | 45 | 177.75721 | 45 | 125.04697 | 45 | 132.66645 |
| 45.02 | 133.06397 | 45.02 | 160.59976 | 45.02 | 181.51324 | 45.02 | 127.4432 | 45.02 | 133.99207 |
| 45.04 | 131.62471 | 45.04 | 164.72347 | 45.04 | 181.71122 | 45.04 | 128.70899 | 45.04 | 136.26299 |
| 45.06 | 130.53671 | 45.06 | 169.51217 | 45.06 | 180.82048 | 45.06 | 128.18973 | 45.06 | 138.35252 |
| 45.08 | 128.0942 | 45.08 | 172.32235 | 45.08 | 180.53168 | 45.08 | 128.04438 | 45.08 | 143.02061 |
| 45.1 | 130.54971 | 45.1 | 173.86429 | 45.1 | 180.73777 | 45.1 | 128.55382 | 45.1 | 147.06546 |
| 45.12 | 129.36225 | 45.12 | 177.20487 | 45.12 | 181.71266 | 45.12 | 127.48717 | 45.12 | 146.24909 |
| 45.14 | 128.34222 | 45.14 | 180.03374 | 45.14 | 180.09879 | 45.14 | 126.53001 | 45.14 | 147.56756 |
| 45.16 | 128.56251 | 45.16 | 180.48258 | 45.16 | 179.12802 | 45.16 | 125.2846 | 45.16 | 148.03889 |
| 45.18 | 128.96513 | 45.18 | 180.48786 | 45.18 | 177.71423 | 45.18 | 123.55279 | 45.18 | 148.91168 |
| 45.2 | 129.18937 | 45.2 | 179.81437 | 45.2 | 177.57566 | 45.2 | 124.37388 | 45.2 | 148.88166 |
| 45.22 | 127.63895 | 45.22 | 183.11645 | 45.22 | 175.95427 | 45.22 | 122.93272 | 45.22 | 147.35296 |
| 45.24 | 126.17838 | 45.24 | 183.22232 | 45.24 | 174.90516 | 45.24 | 122.26867 | 45.24 | 146.15117 |
| 45.26 | 123.94354 | 45.26 | 182.85501 | 45.26 | 171.37394 | 45.26 | 121.56575 | 45.26 | 144.78968 |
| 45.28 | 121.85024 | 45.28 | 181.27041 | 45.28 | 170.70085 | 45.28 | 123.79834 | 45.28 | 145.64702 |
| 45.3 | 120.74753 | 45.3 | 180.54372 | 45.3 | 171.9185 | 45.3 | 122.48819 | 45.3 | 146.17023 |
| 45.32 | 121.64525 | 45.32 | 179.15978 | 45.32 | 175.26019 | 45.32 | 122.98874 | 45.32 | 145.3014 |
| 45.34 | 121.50596 | 45.34 | 181.63039 | 45.34 | 175.90913 | 45.34 | 123.30605 | 45.34 | 143.13109 |
| 45.36 | 119.86001 | 45.36 | 180.32119 | 45.36 | 175.20282 | 45.36 | 123.21998 | 45.36 | 143.2921 |
| 45.38 | 121.54124 | 45.38 | 182.63154 | 45.38 | 178.13589 | 45.38 | 124.28248 | 45.38 | 144.12131 |
| 45.4 | 122.7038 | 45.4 | 183.07118 | 45.4 | 179.89941 | 45.4 | 125.69078 | 45.4 | 143.19208 |
| 45.42 | 123.57718 | 45.42 | 183.41263 | 45.42 | 181.82962 | 45.42 | 123.91534 | 45.42 | 140.18993 |
| 45.44 | 123.27726 | 45.44 | 181.52133 | 45.44 | 183.40835 | 45.44 | 121.13517 | 45.44 | 139.0608 |
| 45.46 | 123.3503 | 45.46 | 180.14775 | 45.46 | 184.52824 | 45.46 | 121.78069 | 45.46 | 137.54244 |
| 45.48 | 124.61174 | 45.48 | 176.82775 | 45.48 | 182.33868 | 45.48 | 118.03618 | 45.48 | 136.30268 |
| 45.5 | 126.14989 | 45.5 | 177.37176 | 45.5 | 180.97947 | 45.5 | 117.30647 | 45.5 | 135.9818 |
| 45.52 | 126.86243 | 45.52 | 173.82336 | 45.52 | 181.42341 | 45.52 | 118.27647 | 45.52 | 136.63736 |
| 45.54 | 128.921 | 45.54 | 171.35653 | 45.54 | 180.62554 | 45.54 | 120.46168 | 45.54 | 134.29962 |
| 45.56 | 129.82836 | 45.56 | 169.78986 | 45.56 | 181.04253 | 45.56 | 121.91774 | 45.56 | 133.73563 |
| 45.58 | 131.28648 | 45.58 | 168.61259 | 45.58 | 181.81267 | 45.58 | 123.36624 | 45.58 | 136.15527 |
| 45.6 | 132.06923 | 45.6 | 170.11695 | 45.6 | 182.75287 | 45.6 | 125.35497 | 45.6 | 133.71165 |
| 45.62 | 130.62657 | 45.62 | 168.03047 | 45.62 | 181.25099 | 45.62 | 124.57635 | 45.62 | 132.27976 |
| 45.64 | 131.13149 | 45.64 | 165.38506 | 45.64 | 180.8146 | 45.64 | 125.34271 | 45.64 | 132.57174 |
| 45.66 | 130.66091 | 45.66 | 160.50121 | 45.66 | 179.92502 | 45.66 | 125.98523 | 45.66 | 131.30065 |
| 45.68 | 132.25796 | 45.68 | 159.82582 | 45.68 | 178.3935 | 45.68 | 128.18158 | 45.68 | 129.54882 |
| 45.7 | 129.09291 | 45.7 | 158.60647 | 45.7 | 176.97331 | 45.7 | 127.58116 | 45.7 | 127.80644 |
| 45.72 | 129.99877 | 45.72 | 157.933 | 45.72 | 175.76263 | 45.72 | 126.83635 | 45.72 | 127.94365 |
| 45.74 | 129.88835 | 45.74 | 156.75685 | 45.74 | 175.82512 | 45.74 | 128.9659 | 45.74 | 127.19504 |
| 45.76 | 129.9197 | 45.76 | 155.4333 | 45.76 | 172.91717 | 45.76 | 128.85887 | 45.76 | 126.9187 |
| 45.78 | 131.36764 | 45.78 | 151.82582 | 45.78 | 172.09269 | 45.78 | 128.0359 | 45.78 | 126.28616 |
| 45.8 | 130.94332 | 45.8 | 150.9196 | 45.8 | 171.53154 | 45.8 | 130.32796 | 45.8 | 125.35316 |
| 45.82 | 129.75097 | 45.82 | 149.72157 | 45.82 | 169.4724 | 45.82 | 130.51106 | 45.82 | 125.72539 |
| 45.84 | 129.77514 | 45.84 | 150.17628 | 45.84 | 171.29126 | 45.84 | 130.28341 | 45.84 | 124.81126 |
| 45.86 | 131.78498 | 45.86 | 150.5062 | 45.86 | 171.39261 | 45.86 | 131.5339 | 45.86 | 123.79122 |
| 45.88 | 132.89126 | 45.88 | 151.75878 | 45.88 | 170.87145 | 45.88 | 130.38344 | 45.88 | 124.76123 |
| 45.9 | 133.78991 | 45.9 | 153.67389 | 45.9 | 172.70785 | 45.9 | 129.31245 | 45.9 | 124.86336 |
| 45.92 | 132.62021 | 45.92 | 156.79381 | 45.92 | 170.37728 | 45.92 | 129.96347 | 45.92 | 125.99965 |
| 45.94 | 130.80645 | 45.94 | 154.53669 | 45.94 | 168.02522 | 45.94 | 129.43969 | 45.94 | 124.79257 |
| 45.96 | 130.2132 | 45.96 | 152.96623 | 45.96 | 166.08426 | 45.96 | 128.32946 | 45.96 | 123.33615 |
| 45.98 | 129.0684 | 45.98 | 153.8194 | 45.98 | 165.28147 | 45.98 | 127.97951 | 45.98 | 122.7865 |
| 46 | 129.62918 | 46 | 153.80541 | 46 | 162.35785 | 46 | 130.13811 | 46 | 120.97766 |
| 46.02 | 126.00188 | 46.02 | 155.11649 | 46.02 | 166.77168 | 46.02 | 130.22345 | 46.02 | 119.89099 |
| 46.04 | 124.66794 | 46.04 | 156.60594 | 46.04 | 166.71146 | 46.04 | 129.30102 | 46.04 | 120.85459 |
| 46.06 | 123.84779 | 46.06 | 158.68093 | 46.06 | 166.06762 | 46.06 | 126.85627 | 46.06 | 121.71703 |
| 46.08 | 124.22607 | 46.08 | 159.35082 | 46.08 | 164.22046 | 46.08 | 127.8931 | 46.08 | 122.56339 |
| 46.1 | 123.54241 | 46.1 | 158.49747 | 46.1 | 161.79515 | 46.1 | 126.71415 | 46.1 | 122.08018 |
| 46.12 | 122.55521 | 46.12 | 156.60029 | 46.12 | 160.4916 | 46.12 | 123.83905 | 46.12 | 120.66321 |
| 46.14 | 122.88647 | 46.14 | 155.42377 | 46.14 | 158.06006 | 46.14 | 121.98509 | 46.14 | 118.61618 |
| 46.16 | 122.47158 | 46.16 | 155.21368 | 46.16 | 160.76001 | 46.16 | 121.70742 | 46.16 | 117.50213 |
| 46.18 | 123.12883 | 46.18 | 153.18437 | 46.18 | 163.86145 | 46.18 | 123.31316 | 46.18 | 118.33095 |
| 46.2 | 122.40156 | 46.2 | 153.21306 | 46.2 | 164.08494 | 46.2 | 121.90411 | 46.2 | 116.78147 |
| 46.22 | 121.71222 | 46.22 | 152.9688 | 46.22 | 164.111 | 46.22 | 120.84726 | 46.22 | 117.0529 |
| 46.24 | 122.62957 | 46.24 | 151.24737 | 46.24 | 166.8402 | 46.24 | 120.8586 | 46.24 | 116.91245 |
| 46.26 | 121.32262 | 46.26 | 151.97598 | 46.26 | 167.29114 | 46.26 | 122.26575 | 46.26 | 119.09257 |
| 46.28 | 120.78446 | 46.28 | 151.73814 | 46.28 | 170.92297 | 46.28 | 122.08699 | 46.28 | 119.646 |
| 46.3 | 122.90398 | 46.3 | 151.78816 | 46.3 | 172.86504 | 46.3 | 120.18359 | 46.3 | 118.21013 |
| 46.32 | 122.60351 | 46.32 | 151.75964 | 46.32 | 175.71108 | 46.32 | 118.83454 | 46.32 | 119.52954 |
| 46.34 | 123.035 | 46.34 | 153.84103 | 46.34 | 174.90301 | 46.34 | 118.0361 | 46.34 | 120.21717 |
| 46.36 | 122.97554 | 46.36 | 151.42648 | 46.36 | 174.78069 | 46.36 | 118.40604 | 46.36 | 121.37781 |
| 46.38 | 125.22248 | 46.38 | 154.23875 | 46.38 | 175.43471 | 46.38 | 118.25559 | 46.38 | 118.98609 |
| 46.4 | 126.30009 | 46.4 | 150.61051 | 46.4 | 174.28971 | 46.4 | 115.44824 | 46.4 | 116.71727 |
| 46.42 | 126.07149 | 46.42 | 149.19334 | 46.42 | 175.51171 | 46.42 | 114.25323 | 46.42 | 116.34692 |
| 46.44 | 127.53547 | 46.44 | 150.63808 | 46.44 | 178.04649 | 46.44 | 113.14428 | 46.44 | 115.28518 |
| 46.46 | 129.98927 | 46.46 | 151.77779 | 46.46 | 177.46361 | 46.46 | 113.74206 | 46.46 | 117.0153 |
| 46.48 | 130.10347 | 46.48 | 152.84012 | 46.48 | 178.48572 | 46.48 | 112.83718 | 46.48 | 119.29149 |
| 46.5 | 128.00377 | 46.5 | 155.92477 | 46.5 | 180.50446 | 46.5 | 113.08445 | 46.5 | 119.49649 |
| 46.52 | 129.3562 | 46.52 | 155.24564 | 46.52 | 181.04882 | 46.52 | 112.49552 | 46.52 | 120.95102 |
| 46.54 | 129.69333 | 46.54 | 155.19637 | 46.54 | 181.68021 | 46.54 | 113.08688 | 46.54 | 120.66581 |
| 46.56 | 129.09461 | 46.56 | 155.74566 | 46.56 | 179.50368 | 46.56 | 111.86356 | 46.56 | 121.16621 |
| 46.58 | 128.04834 | 46.58 | 156.70095 | 46.58 | 178.98479 | 46.58 | 110.31993 | 46.58 | 119.25014 |
| 46.6 | 126.597 | 46.6 | 156.25095 | 46.6 | 177.09535 | 46.6 | 111.02699 | 46.6 | 117.65686 |
| 46.62 | 127.01964 | 46.62 | 154.78393 | 46.62 | 174.09605 | 46.62 | 110.00185 | 46.62 | 118.33391 |
| 46.64 | 128.53214 | 46.64 | 154.79527 | 46.64 | 171.29984 | 46.64 | 110.77406 | 46.64 | 117.21326 |
| 46.66 | 128.3228 | 46.66 | 153.03288 | 46.66 | 169.91455 | 46.66 | 112.20612 | 46.66 | 116.36631 |
| 46.68 | 126.39353 | 46.68 | 153.90155 | 46.68 | 167.77179 | 46.68 | 112.85507 | 46.68 | 117.42052 |
| 46.7 | 124.35367 | 46.7 | 155.56243 | 46.7 | 167.52205 | 46.7 | 113.14235 | 46.7 | 118.3205 |
| 46.72 | 125.41259 | 46.72 | 152.36944 | 46.72 | 166.82366 | 46.72 | 114.8755 | 46.72 | 116.7557 |
| 46.74 | 123.05692 | 46.74 | 153.56444 | 46.74 | 165.64715 | 46.74 | 115.1539 | 46.74 | 116.79893 |
| 46.76 | 123.96445 | 46.76 | 154.08411 | 46.76 | 162.28864 | 46.76 | 114.26768 | 46.76 | 116.70302 |
| 46.78 | 125.07338 | 46.78 | 156.24064 | 46.78 | 159.74291 | 46.78 | 114.85095 | 46.78 | 119.3384 |
| 46.8 | 127.55117 | 46.8 | 158.48967 | 46.8 | 160.3996 | 46.8 | 117.21248 | 46.8 | 120.35749 |
| 46.82 | 128.43851 | 46.82 | 158.20635 | 46.82 | 158.35179 | 46.82 | 114.5131 | 46.82 | 121.14742 |
| 46.84 | 130.22583 | 46.84 | 159.39362 | 46.84 | 156.94012 | 46.84 | 115.12674 | 46.84 | 122.55836 |
| 46.86 | 130.10332 | 46.86 | 159.63918 | 46.86 | 155.91612 | 46.86 | 116.20964 | 46.86 | 125.29607 |
| 46.88 | 128.08364 | 46.88 | 156.04983 | 46.88 | 155.44405 | 46.88 | 115.52692 | 46.88 | 129.69671 |
| 46.9 | 125.18964 | 46.9 | 157.17331 | 46.9 | 156.55544 | 46.9 | 117.84163 | 46.9 | 132.9903 |
| 46.92 | 122.189 | 46.92 | 160.08088 | 46.92 | 154.43252 | 46.92 | 118.66366 | 46.92 | 135.32049 |
| 46.94 | 121.35507 | 46.94 | 157.27315 | 46.94 | 155.51768 | 46.94 | 118.28294 | 46.94 | 138.54025 |
| 46.96 | 120.00926 | 46.96 | 158.96854 | 46.96 | 159.36621 | 46.96 | 121.38626 | 46.96 | 142.4437 |
| 46.98 | 118.49923 | 46.98 | 158.51288 | 46.98 | 162.2334 | 46.98 | 126.2397 | 46.98 | 145.71879 |
| 47 | 115.81136 | 47 | 158.56214 | 47 | 165.89488 | 47 | 130.15711 | 47 | 149.70963 |
| 47.02 | 115.47707 | 47.02 | 160.8657 | 47.02 | 174.11892 | 47.02 | 133.69682 | 47.02 | 158.62036 |
| 47.04 | 116.02766 | 47.04 | 163.4252 | 47.04 | 176.03177 | 47.04 | 137.82978 | 47.04 | 166.77362 |
| 47.06 | 114.47572 | 47.06 | 165.24709 | 47.06 | 179.18776 | 47.06 | 140.77266 | 47.06 | 173.08899 |
| 47.08 | 114.04009 | 47.08 | 164.98433 | 47.08 | 184.15634 | 47.08 | 146.25259 | 47.08 | 179.551 |
| 47.1 | 110.58456 | 47.1 | 165.44243 | 47.1 | 189.28369 | 47.1 | 149.60393 | 47.1 | 185.46562 |
| 47.12 | 113.21409 | 47.12 | 168.73904 | 47.12 | 194.85667 | 47.12 | 154.53194 | 47.12 | 190.36078 |
| 47.14 | 112.20407 | 47.14 | 172.08471 | 47.14 | 201.73377 | 47.14 | 156.80603 | 47.14 | 195.87525 |
| 47.16 | 113.30378 | 47.16 | 173.11529 | 47.16 | 209.33417 | 47.16 | 161.60401 | 47.16 | 202.1721 |
| 47.18 | 114.7019 | 47.18 | 175.41166 | 47.18 | 212.18948 | 47.18 | 164.01254 | 47.18 | 208.45046 |
| 47.2 | 115.05165 | 47.2 | 181.15661 | 47.2 | 217.22318 | 47.2 | 165.7017 | 47.2 | 210.81631 |
| 47.22 | 115.87368 | 47.22 | 183.16344 | 47.22 | 223.17725 | 47.22 | 167.4705 | 47.22 | 214.24599 |
| 47.24 | 116.23196 | 47.24 | 185.58517 | 47.24 | 227.6175 | 47.24 | 171.64614 | 47.24 | 216.10525 |
| 47.26 | 118.12044 | 47.26 | 188.24791 | 47.26 | 230.27194 | 47.26 | 174.90422 | 47.26 | 216.92482 |
| 47.28 | 117.58251 | 47.28 | 190.29702 | 47.28 | 236.66599 | 47.28 | 175.16207 | 47.28 | 217.7995 |
| 47.3 | 119.72205 | 47.3 | 193.9247 | 47.3 | 239.11903 | 47.3 | 176.00108 | 47.3 | 220.59005 |
| 47.32 | 121.70305 | 47.32 | 194.24578 | 47.32 | 242.17798 | 47.32 | 176.31137 | 47.32 | 222.4478 |
| 47.34 | 123.18723 | 47.34 | 195.77773 | 47.34 | 241.56037 | 47.34 | 175.66585 | 47.34 | 221.88153 |
| 47.36 | 123.29237 | 47.36 | 197.20132 | 47.36 | 243.73692 | 47.36 | 175.92709 | 47.36 | 222.1339 |
| 47.38 | 124.6765 | 47.38 | 200.75878 | 47.38 | 245.63125 | 47.38 | 175.94597 | 47.38 | 223.03485 |
| 47.4 | 124.75916 | 47.4 | 199.18779 | 47.4 | 246.08726 | 47.4 | 174.73831 | 47.4 | 222.33155 |
| 47.42 | 123.63286 | 47.42 | 201.20503 | 47.42 | 246.60312 | 47.42 | 176.6015 | 47.42 | 221.65223 |
| 47.44 | 124.72897 | 47.44 | 203.25339 | 47.44 | 248.99897 | 47.44 | 175.06296 | 47.44 | 218.76978 |
| 47.46 | 124.95435 | 47.46 | 201.21692 | 47.46 | 247.95459 | 47.46 | 172.89947 | 47.46 | 215.79501 |
| 47.48 | 124.65479 | 47.48 | 202.26732 | 47.48 | 245.45134 | 47.48 | 170.99512 | 47.48 | 211.86948 |
| 47.5 | 126.11312 | 47.5 | 201.07876 | 47.5 | 243.79201 | 47.5 | 167.38347 | 47.5 | 205.79405 |
| 47.52 | 128.4046 | 47.52 | 198.75728 | 47.52 | 241.60547 | 47.52 | 165.64597 | 47.52 | 202.65014 |
| 47.54 | 127.92968 | 47.54 | 194.96633 | 47.54 | 237.26224 | 47.54 | 163.82373 | 47.54 | 195.4399 |
| 47.56 | 128.03481 | 47.56 | 195.56449 | 47.56 | 233.43524 | 47.56 | 162.19817 | 47.56 | 188.77704 |
| 47.58 | 127.91344 | 47.58 | 193.63144 | 47.58 | 231.28252 | 47.58 | 159.23057 | 47.58 | 182.634 |
| 47.6 | 128.10956 | 47.6 | 190.07189 | 47.6 | 223.82671 | 47.6 | 157.43513 | 47.6 | 179.08486 |
| 47.62 | 126.63293 | 47.62 | 189.18458 | 47.62 | 221.47898 | 47.62 | 153.41182 | 47.62 | 171.68701 |
| 47.64 | 127.04819 | 47.64 | 186.7221 | 47.64 | 217.27655 | 47.64 | 150.11317 | 47.64 | 167.18898 |
| 47.66 | 126.88566 | 47.66 | 185.31682 | 47.66 | 212.58125 | 47.66 | 145.89658 | 47.66 | 162.2521 |
| 47.68 | 125.48698 | 47.68 | 184.88194 | 47.68 | 208.21292 | 47.68 | 143.71648 | 47.68 | 156.77897 |
| 47.7 | 126.04533 | 47.7 | 183.80679 | 47.7 | 202.51593 | 47.7 | 137.6867 | 47.7 | 147.7178 |
| 47.72 | 126.75183 | 47.72 | 180.26575 | 47.72 | 196.58716 | 47.72 | 134.09866 | 47.72 | 140.23009 |
| 47.74 | 124.93922 | 47.74 | 180.21195 | 47.74 | 190.75428 | 47.74 | 129.34527 | 47.74 | 137.4722 |
| 47.76 | 124.87543 | 47.76 | 175.64523 | 47.76 | 184.55898 | 47.76 | 125.05091 | 47.76 | 131.6642 |
| 47.78 | 124.40336 | 47.78 | 171.65267 | 47.78 | 179.46316 | 47.78 | 119.00341 | 47.78 | 126.31773 |
| 47.8 | 122.05563 | 47.8 | 167.89361 | 47.8 | 175.33625 | 47.8 | 117.54415 | 47.8 | 120.1011 |
| 47.82 | 119.64109 | 47.82 | 165.15968 | 47.82 | 169.72928 | 47.82 | 112.31544 | 47.82 | 117.08613 |
| 47.84 | 118.17879 | 47.84 | 161.95651 | 47.84 | 166.10576 | 47.84 | 112.01778 | 47.84 | 115.45152 |
| 47.86 | 117.09533 | 47.86 | 157.18365 | 47.86 | 161.71022 | 47.86 | 109.84409 | 47.86 | 113.09285 |
| 47.88 | 116.73839 | 47.88 | 153.56976 | 47.88 | 159.74169 | 47.88 | 106.92121 | 47.88 | 111.76419 |
| 47.9 | 113.67093 | 47.9 | 152.80983 | 47.9 | 158.31961 | 47.9 | 108.10186 | 47.9 | 110.19336 |
| 47.92 | 113.48709 | 47.92 | 150.18328 | 47.92 | 154.13532 | 47.92 | 107.02671 | 47.92 | 108.70445 |
| 47.94 | 114.40368 | 47.94 | 147.31232 | 47.94 | 154.23554 | 47.94 | 109.02942 | 47.94 | 109.51041 |
| 47.96 | 112.50481 | 47.96 | 148.95334 | 47.96 | 154.849 | 47.96 | 111.38771 | 47.96 | 109.5708 |
| 47.98 | 110.83925 | 47.98 | 144.1412 | 47.98 | 152.72399 | 47.98 | 110.07511 | 47.98 | 110.21634 |
| 48 | 108.82052 | 48 | 145.41113 | 48 | 150.95194 | 48 | 110.34334 | 48 | 112.60388 |
| 48.02 | 109.27541 | 48.02 | 145.31957 | 48.02 | 150.08631 | 48.02 | 109.69515 | 48.02 | 116.75063 |
| 48.04 | 106.41409 | 48.04 | 146.54912 | 48.04 | 146.57378 | 48.04 | 109.87882 | 48.04 | 116.63378 |
| 48.06 | 105.05355 | 48.06 | 145.78862 | 48.06 | 144.48782 | 48.06 | 109.64572 | 48.06 | 117.35936 |
| 48.08 | 103.22923 | 48.08 | 146.59026 | 48.08 | 143.2088 | 48.08 | 112.48856 | 48.08 | 118.27839 |
| 48.1 | 102.51365 | 48.1 | 146.45737 | 48.1 | 143.60406 | 48.1 | 113.78814 | 48.1 | 119.31162 |
| 48.12 | 104.13921 | 48.12 | 147.22523 | 48.12 | 146.6279 | 48.12 | 114.61565 | 48.12 | 118.68156 |
| 48.14 | 102.66751 | 48.14 | 145.44565 | 48.14 | 148.02428 | 48.14 | 115.02676 | 48.14 | 118.53414 |
| 48.16 | 104.71381 | 48.16 | 147.0661 | 48.16 | 149.4771 | 48.16 | 116.42584 | 48.16 | 117.03427 |
| 48.18 | 105.10792 | 48.18 | 150.04088 | 48.18 | 151.02905 | 48.18 | 116.41376 | 48.18 | 117.89481 |
| 48.2 | 104.82101 | 48.2 | 150.80929 | 48.2 | 153.67747 | 48.2 | 117.67483 | 48.2 | 114.19539 |
| 48.22 | 105.05921 | 48.22 | 149.28642 | 48.22 | 154.79018 | 48.22 | 115.71405 | 48.22 | 113.71481 |
| 48.24 | 105.38236 | 48.24 | 147.8013 | 48.24 | 153.78825 | 48.24 | 117.45362 | 48.24 | 114.31845 |
| 48.26 | 105.84232 | 48.26 | 147.25486 | 48.26 | 154.62142 | 48.26 | 115.82317 | 48.26 | 113.87922 |
| 48.28 | 105.66205 | 48.28 | 145.45679 | 48.28 | 156.75698 | 48.28 | 112.40956 | 48.28 | 116.43572 |
| 48.3 | 107.66831 | 48.3 | 146.31375 | 48.3 | 155.36867 | 48.3 | 113.01187 | 48.3 | 116.50518 |
| 48.32 | 107.41991 | 48.32 | 144.89565 | 48.32 | 156.74791 | 48.32 | 115.15291 | 48.32 | 115.34755 |
| 48.34 | 106.54634 | 48.34 | 146.85038 | 48.34 | 156.431 | 48.34 | 116.33925 | 48.34 | 115.36944 |
| 48.36 | 106.21863 | 48.36 | 147.59615 | 48.36 | 157.48727 | 48.36 | 119.5996 | 48.36 | 115.00025 |
| 48.38 | 106.40548 | 48.38 | 147.56954 | 48.38 | 159.33969 | 48.38 | 121.36956 | 48.38 | 114.80773 |
| 48.4 | 106.10402 | 48.4 | 145.74582 | 48.4 | 161.44638 | 48.4 | 121.19968 | 48.4 | 112.94926 |
| 48.42 | 107.50081 | 48.42 | 145.63255 | 48.42 | 162.37052 | 48.42 | 121.47279 | 48.42 | 112.73241 |
| 48.44 | 108.60747 | 48.44 | 144.70123 | 48.44 | 162.66366 | 48.44 | 119.73228 | 48.44 | 113.57067 |
| 48.46 | 110.0956 | 48.46 | 142.46168 | 48.46 | 162.04266 | 48.46 | 120.20302 | 48.46 | 114.88704 |
| 48.48 | 109.86002 | 48.48 | 143.38131 | 48.48 | 160.06359 | 48.48 | 120.1326 | 48.48 | 115.73304 |
| 48.5 | 111.7355 | 48.5 | 141.20196 | 48.5 | 163.13275 | 48.5 | 118.58877 | 48.5 | 114.12411 |
| 48.52 | 111.43028 | 48.52 | 139.97467 | 48.52 | 161.46622 | 48.52 | 119.00858 | 48.52 | 114.73284 |
| 48.54 | 111.08278 | 48.54 | 138.71152 | 48.54 | 159.16701 | 48.54 | 117.95496 | 48.54 | 113.24696 |
| 48.56 | 112.21551 | 48.56 | 141.09398 | 48.56 | 157.8631 | 48.56 | 116.80411 | 48.56 | 112.71148 |
| 48.58 | 112.15738 | 48.58 | 139.9373 | 48.58 | 156.96047 | 48.58 | 115.94811 | 48.58 | 111.05666 |
| 48.6 | 109.40646 | 48.6 | 141.93246 | 48.6 | 155.75205 | 48.6 | 116.19728 | 48.6 | 110.29526 |
| 48.62 | 108.69279 | 48.62 | 142.38869 | 48.62 | 158.6334 | 48.62 | 113.37295 | 48.62 | 107.99811 |
| 48.64 | 109.74435 | 48.64 | 142.32337 | 48.64 | 156.87157 | 48.64 | 111.27098 | 48.64 | 109.56874 |
| 48.66 | 107.20768 | 48.66 | 143.19222 | 48.66 | 155.99764 | 48.66 | 111.21189 | 48.66 | 107.72424 |
| 48.68 | 106.23805 | 48.68 | 140.49453 | 48.68 | 154.99801 | 48.68 | 111.5307 | 48.68 | 104.38103 |
| 48.7 | 104.46754 | 48.7 | 140.9819 | 48.7 | 155.29888 | 48.7 | 109.99651 | 48.7 | 102.35268 |
| 48.72 | 104.39526 | 48.72 | 141.78316 | 48.72 | 153.41514 | 48.72 | 109.52669 | 48.72 | 102.49575 |
| 48.74 | 103.64214 | 48.74 | 141.57589 | 48.74 | 151.43132 | 48.74 | 109.04272 | 48.74 | 103.49351 |
| 48.76 | 102.59323 | 48.76 | 138.1923 | 48.76 | 148.84593 | 48.76 | 107.78428 | 48.76 | 102.17355 |
| 48.78 | 104.93003 | 48.78 | 139.77368 | 48.78 | 148.59829 | 48.78 | 106.52849 | 48.78 | 102.6983 |
| 48.8 | 105.19166 | 48.8 | 140.65214 | 48.8 | 146.09145 | 48.8 | 109.69844 | 48.8 | 102.20091 |
| 48.82 | 105.34834 | 48.82 | 140.81654 | 48.82 | 145.22129 | 48.82 | 108.66633 | 48.82 | 101.59747 |
| 48.84 | 107.00202 | 48.84 | 140.25008 | 48.84 | 144.61861 | 48.84 | 109.45722 | 48.84 | 100.03514 |
| 48.86 | 106.89332 | 48.86 | 140.03131 | 48.86 | 144.14275 | 48.86 | 109.05046 | 48.86 | 99.30467 |
| 48.88 | 107.79896 | 48.88 | 140.79858 | 48.88 | 144.26393 | 48.88 | 108.16009 | 48.88 | 100.34206 |
| 48.9 | 106.13567 | 48.9 | 142.41696 | 48.9 | 142.97887 | 48.9 | 109.06894 | 48.9 | 101.17164 |
| 48.92 | 107.84333 | 48.92 | 142.14345 | 48.92 | 138.61184 | 48.92 | 108.2456 | 48.92 | 102.24678 |
| 48.94 | 109.29808 | 48.94 | 141.37864 | 48.94 | 139.52618 | 48.94 | 108.14668 | 48.94 | 102.54652 |
| 48.96 | 106.70213 | 48.96 | 140.76593 | 48.96 | 140.70307 | 48.96 | 106.31368 | 48.96 | 100.69652 |
| 48.98 | 106.01225 | 48.98 | 138.7604 | 48.98 | 138.79437 | 48.98 | 105.90974 | 48.98 | 101.60633 |
| 49 | 105.40447 | 49 | 141.19876 | 49 | 138.14751 | 49 | 107.00169 | 49 | 102.06274 |
| 49.02 | 104.56057 | 49.02 | 139.63307 | 49.02 | 137.1662 | 49.02 | 106.8203 | 49.02 | 102.65978 |
| 49.04 | 104.54038 | 49.04 | 142.03423 | 49.04 | 136.17052 | 49.04 | 109.15596 | 49.04 | 98.9262 |
| 49.06 | 104.90562 | 49.06 | 140.13517 | 49.06 | 138.25738 | 49.06 | 109.42304 | 49.06 | 99.81693 |
| 49.08 | 103.88992 | 49.08 | 139.55947 | 49.08 | 141.08342 | 49.08 | 112.2723 | 49.08 | 99.83033 |
| 49.1 | 102.12792 | 49.1 | 139.49681 | 49.1 | 144.89326 | 49.1 | 112.87934 | 49.1 | 99.11268 |
| 49.12 | 102.73649 | 49.12 | 138.46585 | 49.12 | 146.47201 | 49.12 | 111.10166 | 49.12 | 97.93033 |
| 49.14 | 103.24405 | 49.14 | 137.54321 | 49.14 | 146.50391 | 49.14 | 111.13092 | 49.14 | 98.02205 |
| 49.16 | 103.53247 | 49.16 | 138.94302 | 49.16 | 147.93959 | 49.16 | 109.34868 | 49.16 | 96.31154 |
| 49.18 | 104.09948 | 49.18 | 140.24561 | 49.18 | 148.8407 | 49.18 | 109.72656 | 49.18 | 97.78402 |
| 49.2 | 103.42825 | 49.2 | 137.15928 | 49.2 | 148.23065 | 49.2 | 108.37978 | 49.2 | 96.62337 |
| 49.22 | 103.97733 | 49.22 | 135.7608 | 49.22 | 148.73992 | 49.22 | 108.7435 | 49.22 | 96.55542 |
| 49.24 | 102.8499 | 49.24 | 134.48879 | 49.24 | 146.65945 | 49.24 | 110.4257 | 49.24 | 96.12261 |
| 49.26 | 101.93103 | 49.26 | 135.22643 | 49.26 | 146.47164 | 49.26 | 110.80531 | 49.26 | 95.34872 |
| 49.28 | 101.04125 | 49.28 | 135.74099 | 49.28 | 146.35252 | 49.28 | 111.97822 | 49.28 | 96.6366 |
| 49.3 | 100.64637 | 49.3 | 138.00266 | 49.3 | 145.12354 | 49.3 | 114.41464 | 49.3 | 97.11698 |
| 49.32 | 99.48834 | 49.32 | 138.02114 | 49.32 | 145.28193 | 49.32 | 115.6693 | 49.32 | 97.72593 |
| 49.34 | 98.83069 | 49.34 | 136.99884 | 49.34 | 144.76114 | 49.34 | 114.99449 | 49.34 | 98.62836 |
| 49.36 | 98.56963 | 49.36 | 137.211 | 49.36 | 144.83739 | 49.36 | 115.45901 | 49.36 | 99.60422 |
| 49.38 | 98.8439 | 49.38 | 136.27287 | 49.38 | 146.63736 | 49.38 | 115.41465 | 49.38 | 100.77923 |
| 49.4 | 99.96793 | 49.4 | 134.88909 | 49.4 | 145.32911 | 49.4 | 112.94119 | 49.4 | 101.12107 |
| 49.42 | 101.38282 | 49.42 | 134.79471 | 49.42 | 143.70941 | 49.42 | 111.65879 | 49.42 | 100.14879 |
| 49.44 | 102.45399 | 49.44 | 134.21392 | 49.44 | 143.43572 | 49.44 | 110.05418 | 49.44 | 100.27262 |
| 49.46 | 103.32585 | 49.46 | 135.33323 | 49.46 | 141.13028 | 49.46 | 108.80066 | 49.46 | 99.66237 |
| 49.48 | 104.21847 | 49.48 | 136.51198 | 49.48 | 139.06267 | 49.48 | 107.64624 | 49.48 | 100.417 |
| 49.5 | 106.01787 | 49.5 | 134.55571 | 49.5 | 138.12249 | 49.5 | 108.57738 | 49.5 | 102.2532 |
| 49.52 | 105.72907 | 49.52 | 135.79638 | 49.52 | 138.05776 | 49.52 | 107.8556 | 49.52 | 105.67797 |
| 49.54 | 105.58108 | 49.54 | 137.98252 | 49.54 | 138.25578 | 49.54 | 107.75989 | 49.54 | 106.22198 |
| 49.56 | 105.61449 | 49.56 | 137.95287 | 49.56 | 140.16145 | 49.56 | 107.4762 | 49.56 | 106.67819 |
| 49.58 | 103.85529 | 49.58 | 139.14824 | 49.58 | 142.28042 | 49.58 | 107.09511 | 49.58 | 108.95175 |
| 49.6 | 101.23932 | 49.6 | 138.6218 | 49.6 | 143.76555 | 49.6 | 107.62268 | 49.6 | 111.71079 |
| 49.62 | 103.83771 | 49.62 | 138.55628 | 49.62 | 144.0636 | 49.62 | 107.88222 | 49.62 | 114.95907 |
| 49.64 | 103.51834 | 49.64 | 140.07649 | 49.64 | 143.61663 | 49.64 | 110.74864 | 49.64 | 118.90746 |
| 49.66 | 104.94815 | 49.66 | 140.95157 | 49.66 | 143.32556 | 49.66 | 112.99068 | 49.66 | 121.14005 |
| 49.68 | 106.92102 | 49.68 | 141.92686 | 49.68 | 143.15719 | 49.68 | 113.27287 | 49.68 | 121.66253 |
| 49.7 | 106.85458 | 49.7 | 142.94728 | 49.7 | 145.2499 | 49.7 | 113.32289 | 49.7 | 123.31659 |
| 49.72 | 108.72042 | 49.72 | 143.50391 | 49.72 | 143.71192 | 49.72 | 111.90515 | 49.72 | 123.52176 |
| 49.74 | 109.46977 | 49.74 | 143.77948 | 49.74 | 144.62567 | 49.74 | 113.35951 | 49.74 | 123.87436 |
| 49.76 | 109.93297 | 49.76 | 143.64828 | 49.76 | 144.77045 | 49.76 | 113.4218 | 49.76 | 124.17807 |
| 49.78 | 115.51163 | 49.78 | 146.44788 | 49.78 | 147.93285 | 49.78 | 114.60058 | 49.78 | 124.73055 |
| 49.8 | 116.78819 | 49.8 | 145.7744 | 49.8 | 148.69826 | 49.8 | 116.60573 | 49.8 | 123.39341 |
| 49.82 | 117.29971 | 49.82 | 145.95466 | 49.82 | 149.98973 | 49.82 | 116.0372 | 49.82 | 124.46215 |
| 49.84 | 120.52949 | 49.84 | 146.30403 | 49.84 | 152.00354 | 49.84 | 116.19142 | 49.84 | 124.87175 |
| 49.86 | 119.94738 | 49.86 | 145.30006 | 49.86 | 149.85589 | 49.86 | 114.09021 | 49.86 | 124.99802 |
| 49.88 | 121.75961 | 49.88 | 146.37975 | 49.88 | 148.7613 | 49.88 | 113.13548 | 49.88 | 125.92896 |
| 49.9 | 122.52351 | 49.9 | 145.78972 | 49.9 | 148.8285 | 49.9 | 113.05148 | 49.9 | 124.629 |
| 49.92 | 125.08963 | 49.92 | 143.70192 | 49.92 | 149.80928 | 49.92 | 112.09185 | 49.92 | 123.14028 |
| 49.94 | 125.03866 | 49.94 | 143.52016 | 49.94 | 151.29894 | 49.94 | 112.1211 | 49.94 | 121.85486 |
| 49.96 | 122.75699 | 49.96 | 143.96449 | 49.96 | 152.90542 | 49.96 | 111.71114 | 49.96 | 120.2325 |
| 49.98 | 122.84137 | 49.98 | 142.2157 | 49.98 | 150.48274 | 49.98 | 112.6045 | 49.98 | 120.21212 |
| 50 | 123.95429 | 50 | 141.34254 | 50 | 152.19418 | 50 | 113.23438 | 50 | 117.4263 |
| 50.02 | 124.74707 | 50.02 | 139.69301 | 50.02 | 154.45452 | 50.02 | 114.81065 | 50.02 | 116.15182 |
| 50.04 | 124.99773 | 50.04 | 139.56484 | 50.04 | 155.84505 | 50.04 | 115.77215 | 50.04 | 113.76011 |
| 50.06 | 124.11417 | 50.06 | 137.71864 | 50.06 | 158.65617 | 50.06 | 114.87214 | 50.06 | 112.38069 |
| 50.08 | 124.62306 | 50.08 | 137.88721 | 50.08 | 161.40803 | 50.08 | 113.37796 | 50.08 | 109.95272 |
| 50.1 | 127.14408 | 50.1 | 135.22219 | 50.1 | 161.65717 | 50.1 | 112.92834 | 50.1 | 107.78373 |
| 50.12 | 127.60616 | 50.12 | 133.76896 | 50.12 | 160.85044 | 50.12 | 112.6905 | 50.12 | 107.17423 |
| 50.14 | 127.31737 | 50.14 | 136.02854 | 50.14 | 160.18639 | 50.14 | 112.41303 | 50.14 | 105.72326 |
| 50.16 | 125.71882 | 50.16 | 136.21297 | 50.16 | 159.41872 | 50.16 | 109.92429 | 50.16 | 103.08881 |
| 50.18 | 124.02774 | 50.18 | 134.76994 | 50.18 | 158.66935 | 50.18 | 111.50624 | 50.18 | 102.80794 |
| 50.2 | 123.12455 | 50.2 | 133.1476 | 50.2 | 157.09854 | 50.2 | 111.7386 | 50.2 | 99.95434 |
| 50.22 | 122.42089 | 50.22 | 134.95492 | 50.22 | 157.21103 | 50.22 | 113.30565 | 50.22 | 96.5388 |
| 50.24 | 119.82645 | 50.24 | 133.92866 | 50.24 | 154.58939 | 50.24 | 113.49006 | 50.24 | 95.07916 |
| 50.26 | 119.31662 | 50.26 | 135.74808 | 50.26 | 154.2432 | 50.26 | 114.11954 | 50.26 | 93.70712 |
| 50.28 | 119.47082 | 50.28 | 137.01501 | 50.28 | 153.64579 | 50.28 | 112.71369 | 50.28 | 92.15442 |
| 50.3 | 119.58823 | 50.3 | 137.47255 | 50.3 | 153.9646 | 50.3 | 111.82353 | 50.3 | 90.10093 |
| 50.32 | 118.72732 | 50.32 | 138.50824 | 50.32 | 151.86829 | 50.32 | 111.84297 | 50.32 | 88.28265 |
| 50.34 | 116.5961 | 50.34 | 133.53494 | 50.34 | 150.32616 | 50.34 | 112.63327 | 50.34 | 87.75562 |
| 50.36 | 116.65595 | 50.36 | 134.4436 | 50.36 | 148.70174 | 50.36 | 110.271 | 50.36 | 87.95589 |
| 50.38 | 116.17085 | 50.38 | 132.23991 | 50.38 | 146.62676 | 50.38 | 109.88952 | 50.38 | 86.35677 |
| 50.4 | 114.67685 | 50.4 | 133.82357 | 50.4 | 144.98346 | 50.4 | 107.24148 | 50.4 | 86.57289 |
| 50.42 | 113.96846 | 50.42 | 134.58276 | 50.42 | 142.95962 | 50.42 | 107.65467 | 50.42 | 87.21502 |
| 50.44 | 112.45823 | 50.44 | 134.1254 | 50.44 | 141.63191 | 50.44 | 107.92345 | 50.44 | 89.39551 |
| 50.46 | 111.92009 | 50.46 | 136.11242 | 50.46 | 140.24004 | 50.46 | 108.20923 | 50.46 | 91.23546 |
| 50.48 | 110.31567 | 50.48 | 135.26979 | 50.48 | 141.3907 | 50.48 | 109.43558 | 50.48 | 93.54167 |
| 50.5 | 108.94738 | 50.5 | 136.46273 | 50.5 | 141.58248 | 50.5 | 108.79834 | 50.5 | 93.28044 |
| 50.52 | 105.80064 | 50.52 | 137.62526 | 50.52 | 143.82733 | 50.52 | 107.36683 | 50.52 | 96.06043 |
| 50.54 | 104.35684 | 50.54 | 138.36916 | 50.54 | 142.76635 | 50.54 | 108.09542 | 50.54 | 96.65766 |
| 50.56 | 103.80756 | 50.56 | 138.61077 | 50.56 | 142.14174 | 50.56 | 107.43271 | 50.56 | 99.81722 |
| 50.58 | 102.63784 | 50.58 | 140.54041 | 50.58 | 140.52732 | 50.58 | 107.13258 | 50.58 | 100.77969 |
| 50.6 | 103.09178 | 50.6 | 139.44486 | 50.6 | 141.26572 | 50.6 | 106.85681 | 50.6 | 101.33766 |
| 50.62 | 103.55687 | 50.62 | 139.27197 | 50.62 | 139.4012 | 50.62 | 104.37451 | 50.62 | 103.3075 |
| 50.64 | 101.02003 | 50.64 | 138.86181 | 50.64 | 137.70674 | 50.64 | 102.75254 | 50.64 | 103.91245 |
| 50.66 | 100.61456 | 50.66 | 139.58872 | 50.66 | 136.89262 | 50.66 | 101.30065 | 50.66 | 103.22068 |
| 50.68 | 100.57926 | 50.68 | 140.27785 | 50.68 | 136.96265 | 50.68 | 100.18889 | 50.68 | 103.03722 |
| 50.7 | 100.23517 | 50.7 | 140.29463 | 50.7 | 136.81827 | 50.7 | 98.5775 | 50.7 | 104.555 |
| 50.72 | 101.92074 | 50.72 | 143.05232 | 50.72 | 133.56454 | 50.72 | 98.50861 | 50.72 | 105.77814 |
| 50.74 | 102.70238 | 50.74 | 142.5204 | 50.74 | 134.61572 | 50.74 | 97.82002 | 50.74 | 107.78707 |
| 50.76 | 102.63953 | 50.76 | 141.23121 | 50.76 | 135.95588 | 50.76 | 95.5982 | 50.76 | 109.33315 |
| 50.78 | 103.92628 | 50.78 | 140.69968 | 50.78 | 135.19164 | 50.78 | 95.28714 | 50.78 | 110.71786 |
| 50.8 | 102.30223 | 50.8 | 138.38591 | 50.8 | 132.86506 | 50.8 | 94.77788 | 50.8 | 109.65649 |
| 50.82 | 102.09232 | 50.82 | 139.56203 | 50.82 | 131.85051 | 50.82 | 94.07421 | 50.82 | 110.04117 |
| 50.84 | 102.21107 | 50.84 | 138.8746 | 50.84 | 132.91018 | 50.84 | 92.24385 | 50.84 | 110.91341 |
| 50.86 | 101.36355 | 50.86 | 137.52597 | 50.86 | 130.39673 | 50.86 | 89.69755 | 50.86 | 110.25862 |
| 50.88 | 102.80185 | 50.88 | 138.36289 | 50.88 | 131.82447 | 50.88 | 90.23682 | 50.88 | 110.94418 |
| 50.9 | 101.59458 | 50.9 | 137.53387 | 50.9 | 132.43398 | 50.9 | 90.97051 | 50.9 | 110.29147 |
| 50.92 | 101.01056 | 50.92 | 136.28941 | 50.92 | 133.69033 | 50.92 | 91.49733 | 50.92 | 109.47153 |
| 50.94 | 99.65303 | 50.94 | 136.41833 | 50.94 | 129.92184 | 50.94 | 91.87673 | 50.94 | 109.46098 |
| 50.96 | 100.81841 | 50.96 | 136.894 | 50.96 | 134.30888 | 50.96 | 91.62606 | 50.96 | 109.30319 |
| 50.98 | 99.66965 | 50.98 | 136.24957 | 50.98 | 134.56275 | 50.98 | 91.7814 | 50.98 | 108.23408 |
| 51 | 99.27233 | 51 | 137.16936 | 51 | 137.6689 | 51 | 89.14451 | 51 | 107.54852 |
| 51.02 | 99.38576 | 51.02 | 135.55795 | 51.02 | 138.28329 | 51.02 | 88.79115 | 51.02 | 107.06889 |
| 51.04 | 98.88329 | 51.04 | 134.82673 | 51.04 | 137.19755 | 51.04 | 87.35057 | 51.04 | 106.47507 |
| 51.06 | 100.22156 | 51.06 | 136.45379 | 51.06 | 138.77914 | 51.06 | 86.9036 | 51.06 | 106.20911 |
| 51.08 | 99.56961 | 51.08 | 134.90071 | 51.08 | 137.84461 | 51.08 | 88.33249 | 51.08 | 107.71972 |
| 51.1 | 100.22006 | 51.1 | 134.76443 | 51.1 | 134.65275 | 51.1 | 91.12513 | 51.1 | 107.3073 |
| 51.12 | 98.29703 | 51.12 | 135.037 | 51.12 | 135.79434 | 51.12 | 92.74371 | 51.12 | 107.01775 |
| 51.14 | 100.05678 | 51.14 | 134.39411 | 51.14 | 137.38646 | 51.14 | 92.95701 | 51.14 | 106.21649 |
| 51.16 | 100.64173 | 51.16 | 132.86332 | 51.16 | 137.83664 | 51.16 | 94.19599 | 51.16 | 105.12549 |
| 51.18 | 101.21742 | 51.18 | 132.13339 | 51.18 | 137.9846 | 51.18 | 95.91724 | 51.18 | 106.30143 |
| 51.2 | 102.3041 | 51.2 | 132.6151 | 51.2 | 137.90608 | 51.2 | 97.66569 | 51.2 | 104.62038 |
| 51.22 | 101.40638 | 51.22 | 130.47179 | 51.22 | 139.07541 | 51.22 | 96.74589 | 51.22 | 104.3648 |
| 51.24 | 100.66458 | 51.24 | 130.04652 | 51.24 | 137.78735 | 51.24 | 95.62185 | 51.24 | 104.43616 |
| 51.26 | 101.60308 | 51.26 | 131.06353 | 51.26 | 138.95518 | 51.26 | 95.43274 | 51.26 | 102.06012 |
| 51.28 | 100.12457 | 51.28 | 132.17793 | 51.28 | 137.49743 | 51.28 | 96.81254 | 51.28 | 101.26394 |
| 51.3 | 98.90578 | 51.3 | 132.02806 | 51.3 | 135.61742 | 51.3 | 99.98324 | 51.3 | 100.97099 |
| 51.32 | 98.51261 | 51.32 | 132.18831 | 51.32 | 134.1455 | 51.32 | 101.70788 | 51.32 | 99.18916 |
| 51.34 | 95.94819 | 51.34 | 131.09372 | 51.34 | 136.1061 | 51.34 | 102.9263 | 51.34 | 98.54323 |
| 51.36 | 96.85477 | 51.36 | 135.25823 | 51.36 | 135.06588 | 51.36 | 102.95386 | 51.36 | 98.99209 |
| 51.38 | 95.66071 | 51.38 | 134.77653 | 51.38 | 135.27785 | 51.38 | 103.72192 | 51.38 | 98.47679 |
| 51.4 | 93.69596 | 51.4 | 137.16125 | 51.4 | 134.73123 | 51.4 | 104.68834 | 51.4 | 98.09644 |
| 51.42 | 94.19426 | 51.42 | 135.67536 | 51.42 | 134.40825 | 51.42 | 107.26257 | 51.42 | 97.137 |
| 51.44 | 95.32244 | 51.44 | 135.48736 | 51.44 | 135.09871 | 51.44 | 106.68328 | 51.44 | 95.79608 |
| 51.46 | 95.1067 | 51.46 | 135.71688 | 51.46 | 134.00018 | 51.46 | 106.29123 | 51.46 | 94.97275 |
| 51.48 | 93.99475 | 51.48 | 133.69286 | 51.48 | 134.72158 | 51.48 | 105.68685 | 51.48 | 95.0777 |
| 51.5 | 94.0493 | 51.5 | 132.18831 | 51.5 | 136.16763 | 51.5 | 103.63075 | 51.5 | 94.5403 |
| 51.52 | 92.96188 | 51.52 | 130.43911 | 51.52 | 136.87341 | 51.52 | 104.61416 | 51.52 | 95.6915 |
| 51.54 | 93.95324 | 51.54 | 132.01182 | 51.54 | 136.49873 | 51.54 | 102.3457 | 51.54 | 93.52177 |
| 51.56 | 93.59197 | 51.56 | 132.00822 | 51.56 | 136.96381 | 51.56 | 100.84321 | 51.56 | 94.31303 |
| 51.58 | 92.71973 | 51.58 | 129.35924 | 51.58 | 135.29429 | 51.58 | 100.66691 | 51.58 | 92.65614 |
| 51.6 | 92.44453 | 51.6 | 127.45376 | 51.6 | 136.67163 | 51.6 | 100.12046 | 51.6 | 93.8232 |
| 51.62 | 91.86355 | 51.62 | 124.83423 | 51.62 | 137.40513 | 51.62 | 100.06233 | 51.62 | 96.34363 |
| 51.64 | 90.50717 | 51.64 | 125.22833 | 51.64 | 134.84242 | 51.64 | 100.64066 | 51.64 | 94.47195 |
| 51.66 | 89.71326 | 51.66 | 124.39632 | 51.66 | 134.32428 | 51.66 | 101.81489 | 51.66 | 95.49104 |
| 51.68 | 89.84634 | 51.68 | 123.59618 | 51.68 | 134.25955 | 51.68 | 100.76957 | 51.68 | 97.6821 |
| 51.7 | 90.37694 | 51.7 | 122.81115 | 51.7 | 132.14343 | 51.7 | 101.56139 | 51.7 | 98.98621 |
| 51.72 | 91.06627 | 51.72 | 122.83476 | 51.72 | 130.61755 | 51.72 | 101.73937 | 51.72 | 99.97112 |
| 51.74 | 90.26803 | 51.74 | 121.04215 | 51.74 | 132.84881 | 51.74 | 99.11887 | 51.74 | 102.50513 |
| 51.76 | 90.16498 | 51.76 | 118.55814 | 51.76 | 132.98247 | 51.76 | 99.06828 | 51.76 | 103.42322 |
| 51.78 | 91.29543 | 51.78 | 118.15194 | 51.78 | 129.99183 | 51.78 | 101.24367 | 51.78 | 105.62787 |
| 51.8 | 91.38037 | 51.8 | 117.44639 | 51.8 | 130.00562 | 51.8 | 99.6921 | 51.8 | 105.14371 |
| 51.82 | 89.97585 | 51.82 | 119.39774 | 51.82 | 130.66533 | 51.82 | 98.11884 | 51.82 | 106.58257 |
| 51.84 | 88.24724 | 51.84 | 117.6816 | 51.84 | 130.70742 | 51.84 | 95.62652 | 51.84 | 108.744 |
| 51.86 | 89.3539 | 51.86 | 117.58137 | 51.86 | 128.34308 | 51.86 | 96.30868 | 51.86 | 107.51011 |
| 51.88 | 90.55231 | 51.88 | 117.94659 | 51.88 | 128.37479 | 51.88 | 95.44456 | 51.88 | 107.71095 |
| 51.9 | 89.46716 | 51.9 | 116.94413 | 51.9 | 128.96559 | 51.9 | 94.60102 | 51.9 | 108.53429 |
| 51.92 | 90.49021 | 51.92 | 115.95205 | 51.92 | 130.37633 | 51.92 | 93.79994 | 51.92 | 108.95163 |
| 51.94 | 89.93489 | 51.94 | 115.82692 | 51.94 | 128.24339 | 51.94 | 92.22347 | 51.94 | 111.34767 |
| 51.96 | 90.43169 | 51.96 | 116.37996 | 51.96 | 130.54563 | 51.96 | 90.98692 | 51.96 | 113.08646 |
| 51.98 | 88.79122 | 51.98 | 115.45978 | 51.98 | 128.40004 | 51.98 | 91.45899 | 51.98 | 111.54697 |
| 52 | 88.78367 | 52 | 113.13319 | 52 | 126.29977 | 52 | 90.5152 | 52 | 112.05321 |
| 52.02 | 89.80994 | 52.02 | 109.80338 | 52.02 | 123.58433 | 52.02 | 92.73797 | 52.02 | 111.87843 |
| 52.04 | 90.37886 | 52.04 | 110.7181 | 52.04 | 122.6934 | 52.04 | 93.8837 | 52.04 | 112.49698 |
| 52.06 | 92.31246 | 52.06 | 111.23793 | 52.06 | 123.79139 | 52.06 | 95.77635 | 52.06 | 111.23025 |
| 52.08 | 93.2836 | 52.08 | 108.73617 | 52.08 | 123.29306 | 52.08 | 97.33924 | 52.08 | 111.01939 |
| 52.1 | 95.40501 | 52.1 | 108.43493 | 52.1 | 123.25359 | 52.1 | 96.28578 | 52.1 | 111.44616 |
| 52.12 | 95.55789 | 52.12 | 108.04571 | 52.12 | 126.31841 | 52.12 | 98.13388 | 52.12 | 111.03617 |
| 52.14 | 97.3807 | 52.14 | 110.5467 | 52.14 | 127.06909 | 52.14 | 98.43796 | 52.14 | 111.26192 |
| 52.16 | 97.60645 | 52.16 | 112.5122 | 52.16 | 126.43601 | 52.16 | 98.98497 | 52.16 | 110.72661 |
| 52.18 | 98.05153 | 52.18 | 113.83158 | 52.18 | 128.21313 | 52.18 | 99.02764 | 52.18 | 110.41252 |
| 52.2 | 98.17196 | 52.2 | 115.76858 | 52.2 | 128.63765 | 52.2 | 100.32344 | 52.2 | 106.75125 |
| 52.22 | 98.60043 | 52.22 | 118.01814 | 52.22 | 130.50632 | 52.22 | 99.37967 | 52.22 | 105.49944 |
| 52.24 | 99.11498 | 52.24 | 120.83606 | 52.24 | 130.05633 | 52.24 | 102.70025 | 52.24 | 103.68211 |
| 52.26 | 99.32166 | 52.26 | 122.22285 | 52.26 | 132.19151 | 52.26 | 107.17205 | 52.26 | 102.7993 |
| 52.28 | 98.68027 | 52.28 | 123.29214 | 52.28 | 133.23042 | 52.28 | 110.75121 | 52.28 | 102.74966 |
| 52.3 | 98.36183 | 52.3 | 121.85363 | 52.3 | 134.47359 | 52.3 | 109.51431 | 52.3 | 102.26269 |
| 52.32 | 99.39488 | 52.32 | 122.51862 | 52.32 | 137.90987 | 52.32 | 109.56378 | 52.32 | 102.31327 |
| 52.34 | 99.7018 | 52.34 | 121.39476 | 52.34 | 137.20923 | 52.34 | 109.01244 | 52.34 | 103.15719 |
| 52.36 | 99.65083 | 52.36 | 120.70355 | 52.36 | 133.70898 | 52.36 | 111.014 | 52.36 | 101.16736 |
| 52.38 | 99.38638 | 52.38 | 118.24142 | 52.38 | 135.88306 | 52.38 | 111.7075 | 52.38 | 98.24148 |
| 52.4 | 98.90658 | 52.4 | 118.6514 | 52.4 | 138.08357 | 52.4 | 114.67057 | 52.4 | 95.74823 |
| 52.42 | 98.8441 | 52.42 | 119.05288 | 52.42 | 138.27025 | 52.42 | 116.00167 | 52.42 | 95.57079 |
| 52.44 | 100.84718 | 52.44 | 120.5501 | 52.44 | 140.0689 | 52.44 | 115.45446 | 52.44 | 94.49602 |
| 52.46 | 98.83146 | 52.46 | 120.46441 | 52.46 | 140.28446 | 52.46 | 116.87107 | 52.46 | 92.5258 |
| 52.48 | 97.13116 | 52.48 | 120.09067 | 52.48 | 142.14313 | 52.48 | 116.85504 | 52.48 | 93.09904 |
| 52.5 | 95.82743 | 52.5 | 122.5458 | 52.5 | 144.68453 | 52.5 | 117.68346 | 52.5 | 93.13207 |
| 52.52 | 94.90705 | 52.52 | 125.06436 | 52.52 | 145.85292 | 52.52 | 117.99319 | 52.52 | 91.08051 |
| 52.54 | 96.00881 | 52.54 | 125.12346 | 52.54 | 148.00302 | 52.54 | 117.36218 | 52.54 | 91.1917 |
| 52.56 | 95.81761 | 52.56 | 123.43335 | 52.56 | 149.36093 | 52.56 | 119.83771 | 52.56 | 91.40858 |
| 52.58 | 95.63016 | 52.58 | 121.89726 | 52.58 | 149.97288 | 52.58 | 121.14484 | 52.58 | 91.69057 |
| 52.6 | 95.48896 | 52.6 | 121.85063 | 52.6 | 154.26194 | 52.6 | 122.69301 | 52.6 | 91.33118 |
| 52.62 | 95.68791 | 52.62 | 122.20927 | 52.62 | 153.22135 | 52.62 | 123.18358 | 52.62 | 92.34877 |
| 52.64 | 94.33434 | 52.64 | 123.56153 | 52.64 | 152.18206 | 52.64 | 124.85312 | 52.64 | 89.68942 |
| 52.66 | 94.65823 | 52.66 | 123.15496 | 52.66 | 154.76987 | 52.66 | 125.47261 | 52.66 | 92.30857 |
| 52.68 | 97.44238 | 52.68 | 124.94812 | 52.68 | 155.70572 | 52.68 | 124.82387 | 52.68 | 93.43412 |
| 52.7 | 98.37315 | 52.7 | 125.60216 | 52.7 | 155.19852 | 52.7 | 125.14153 | 52.7 | 95.09894 |
| 52.72 | 98.41788 | 52.72 | 125.33904 | 52.72 | 156.24518 | 52.72 | 122.54276 | 52.72 | 96.454 |
| 52.74 | 99.47245 | 52.74 | 125.16482 | 52.74 | 158.18916 | 52.74 | 121.39305 | 52.74 | 96.61899 |
| 52.76 | 100.38263 | 52.76 | 123.61628 | 52.76 | 156.2042 | 52.76 | 121.24659 | 52.76 | 96.70186 |
| 52.78 | 100.75637 | 52.78 | 126.45573 | 52.78 | 154.61149 | 52.78 | 120.55708 | 52.78 | 96.70074 |
| 52.8 | 100.10158 | 52.8 | 126.39456 | 52.8 | 153.25021 | 52.8 | 118.69181 | 52.8 | 96.12165 |
| 52.82 | 100.06081 | 52.82 | 126.32962 | 52.82 | 151.86513 | 52.82 | 116.80503 | 52.82 | 95.76924 |
| 52.84 | 102.33039 | 52.84 | 125.56874 | 52.84 | 152.47782 | 52.84 | 116.5636 | 52.84 | 95.83229 |
| 52.86 | 102.83549 | 52.86 | 126.11708 | 52.86 | 149.05023 | 52.86 | 115.39273 | 52.86 | 93.35639 |
| 52.88 | 103.05425 | 52.88 | 125.13708 | 52.88 | 148.02924 | 52.88 | 114.53182 | 52.88 | 93.77994 |
| 52.9 | 102.28149 | 52.9 | 126.18582 | 52.9 | 148.43261 | 52.9 | 113.49633 | 52.9 | 95.35473 |
| 52.92 | 101.76392 | 52.92 | 127.32629 | 52.92 | 146.71399 | 52.92 | 113.69244 | 52.92 | 94.4974 |
| 52.94 | 101.59404 | 52.94 | 128.56226 | 52.94 | 143.71317 | 52.94 | 112.48421 | 52.94 | 94.68748 |
| 52.96 | 102.31207 | 52.96 | 129.23346 | 52.96 | 141.4115 | 52.96 | 112.56158 | 52.96 | 93.72898 |
| 52.98 | 100.84733 | 52.98 | 127.32532 | 52.98 | 138.57525 | 52.98 | 111.84942 | 52.98 | 92.84242 |
| 53 | 100.58685 | 53 | 128.26323 | 53 | 135.52083 | 53 | 108.88464 | 53 | 93.73145 |
| 53.02 | 102.34095 | 53.02 | 128.67699 | 53.02 | 133.24727 | 53.02 | 107.25248 | 53.02 | 95.68204 |
| 53.04 | 103.93441 | 53.04 | 131.31955 | 53.04 | 134.31127 | 53.04 | 107.22868 | 53.04 | 97.69887 |
| 53.06 | 102.96816 | 53.06 | 131.39599 | 53.06 | 133.22631 | 53.06 | 106.57314 | 53.06 | 98.41142 |
| 53.08 | 103.3232 | 53.08 | 132.15836 | 53.08 | 132.53413 | 53.08 | 105.56915 | 53.08 | 100.64645 |
| 53.1 | 102.3966 | 53.1 | 133.41094 | 53.1 | 131.82591 | 53.1 | 102.84807 | 53.1 | 101.55908 |
| 53.12 | 103.67353 | 53.12 | 132.59757 | 53.12 | 132.67983 | 53.12 | 102.98115 | 53.12 | 101.54512 |
| 53.14 | 103.8151 | 53.14 | 131.28326 | 53.14 | 130.73225 | 53.14 | 100.87389 | 53.14 | 103.67523 |
| 53.16 | 102.8213 | 53.16 | 130.71794 | 53.16 | 130.26187 | 53.16 | 98.52597 | 53.16 | 104.196 |
| 53.18 | 103.04687 | 53.18 | 130.72907 | 53.18 | 129.54669 | 53.18 | 95.63973 | 53.18 | 104.31171 |
| 53.2 | 101.31733 | 53.2 | 131.36292 | 53.2 | 130.06482 | 53.2 | 93.88205 | 53.2 | 103.17881 |
| 53.22 | 101.67993 | 53.22 | 128.70715 | 53.22 | 129.491 | 53.22 | 91.75289 | 53.22 | 105.1834 |
| 53.24 | 101.57989 | 53.24 | 127.44174 | 53.24 | 129.03138 | 53.24 | 91.71269 | 53.24 | 106.17624 |
| 53.26 | 100.57326 | 53.26 | 126.79696 | 53.26 | 129.35189 | 53.26 | 90.26324 | 53.26 | 105.47275 |
| 53.28 | 98.67308 | 53.28 | 126.27883 | 53.28 | 127.82394 | 53.28 | 88.37192 | 53.28 | 104.61354 |
| 53.3 | 98.5485 | 53.3 | 125.9355 | 53.3 | 126.16574 | 53.3 | 85.10268 | 53.3 | 105.50559 |
| 53.32 | 100.32526 | 53.32 | 126.94552 | 53.32 | 126.01793 | 53.32 | 85.03793 | 53.32 | 105.91235 |
| 53.34 | 98.65365 | 53.34 | 126.84114 | 53.34 | 123.27382 | 53.34 | 85.50849 | 53.34 | 104.26131 |
| 53.36 | 97.5366 | 53.36 | 125.81867 | 53.36 | 122.63583 | 53.36 | 85.41958 | 53.36 | 103.85813 |
| 53.38 | 97.46053 | 53.38 | 126.20901 | 53.38 | 124.53713 | 53.38 | 85.00074 | 53.38 | 104.71959 |
| 53.4 | 97.04924 | 53.4 | 127.0337 | 53.4 | 125.62587 | 53.4 | 85.44129 | 53.4 | 104.93306 |
| 53.42 | 95.06902 | 53.42 | 127.73059 | 53.42 | 126.04415 | 53.42 | 84.43277 | 53.42 | 106.81645 |
| 53.44 | 94.87554 | 53.44 | 128.18852 | 53.44 | 129.16086 | 53.44 | 82.90556 | 53.44 | 105.95609 |
| 53.46 | 93.22753 | 53.46 | 128.4388 | 53.46 | 130.98442 | 53.46 | 85.2584 | 53.46 | 105.61709 |
| 53.48 | 93.73207 | 53.48 | 127.64357 | 53.48 | 131.62241 | 53.48 | 85.95283 | 53.48 | 107.66961 |
| 53.5 | 94.27135 | 53.5 | 128.89407 | 53.5 | 135.47412 | 53.5 | 85.23706 | 53.5 | 107.73133 |
| 53.52 | 95.38933 | 53.52 | 127.26019 | 53.52 | 136.54041 | 53.52 | 86.82204 | 53.52 | 106.47195 |
| 53.54 | 96.99546 | 53.54 | 125.76071 | 53.54 | 138.41909 | 53.54 | 89.07087 | 53.54 | 107.17714 |
| 53.56 | 97.42845 | 53.56 | 124.89883 | 53.56 | 138.78112 | 53.56 | 89.68454 | 53.56 | 107.79361 |
| 53.58 | 98.2884 | 53.58 | 125.80127 | 53.58 | 140.40138 | 53.58 | 90.93277 | 53.58 | 105.60215 |
| 53.6 | 100.11743 | 53.6 | 126.68482 | 53.6 | 141.14526 | 53.6 | 91.56698 | 53.6 | 104.62629 |
| 53.62 | 99.89489 | 53.62 | 126.84677 | 53.62 | 140.15618 | 53.62 | 90.60301 | 53.62 | 103.83373 |
| 53.64 | 100.0255 | 53.64 | 125.92641 | 53.64 | 140.34777 | 53.64 | 91.86804 | 53.64 | 102.73423 |
| 53.66 | 100.5812 | 53.66 | 123.62226 | 53.66 | 139.84795 | 53.66 | 91.33292 | 53.66 | 102.80406 |
| 53.68 | 100.81657 | 53.68 | 124.27232 | 53.68 | 142.32839 | 53.68 | 91.6706 | 53.68 | 101.16699 |
| 53.7 | 101.61387 | 53.7 | 122.67452 | 53.7 | 140.84309 | 53.7 | 90.65944 | 53.7 | 100.67359 |
| 53.72 | 102.97119 | 53.72 | 123.02617 | 53.72 | 138.7702 | 53.72 | 91.46071 | 53.72 | 97.73675 |
| 53.74 | 104.62033 | 53.74 | 120.03497 | 53.74 | 137.57275 | 53.74 | 93.26407 | 53.74 | 97.11594 |
| 53.76 | 105.73606 | 53.76 | 119.13932 | 53.76 | 136.46232 | 53.76 | 94.82281 | 53.76 | 96.79657 |
| 53.78 | 104.9884 | 53.78 | 121.48782 | 53.78 | 135.25939 | 53.78 | 94.39622 | 53.78 | 94.91224 |
| 53.8 | 106.62093 | 53.8 | 121.4882 | 53.8 | 133.04098 | 53.8 | 95.56385 | 53.8 | 95.29767 |
| 53.82 | 105.19885 | 53.82 | 121.76908 | 53.82 | 134.93475 | 53.82 | 96.48498 | 53.82 | 93.31537 |
| 53.84 | 106.38818 | 53.84 | 123.18513 | 53.84 | 136.65279 | 53.84 | 97.87364 | 53.84 | 92.59867 |
| 53.86 | 105.37702 | 53.86 | 125.18122 | 53.86 | 134.07913 | 53.86 | 98.74946 | 53.86 | 92.61301 |
| 53.88 | 107.04355 | 53.88 | 124.91053 | 53.88 | 134.22843 | 53.88 | 99.25685 | 53.88 | 93.46601 |
| 53.9 | 107.99882 | 53.9 | 127.84527 | 53.9 | 136.11843 | 53.9 | 97.7419 | 53.9 | 92.41465 |
| 53.92 | 107.16434 | 53.92 | 129.50499 | 53.92 | 133.27089 | 53.92 | 99.67436 | 53.92 | 92.17079 |
| 53.94 | 109.57529 | 53.94 | 128.8149 | 53.94 | 130.90409 | 53.94 | 97.77491 | 53.94 | 91.48583 |
| 53.96 | 108.5796 | 53.96 | 127.92455 | 53.96 | 129.445 | 53.96 | 98.14601 | 53.96 | 92.20423 |
| 53.98 | 107.36099 | 53.98 | 128.51894 | 53.98 | 128.04443 | 53.98 | 97.63507 | 53.98 | 92.591 |
| 54 | 109.30459 | 54 | 130.32609 | 54 | 127.32943 | 54 | 99.52903 | 54 | 93.49343 |
| 54.02 | 109.4065 | 54.02 | 129.27246 | 54.02 | 126.67651 | 54.02 | 100.9311 | 54.02 | 94.65276 |
| 54.04 | 108.65091 | 54.04 | 130.36195 | 54.04 | 129.03066 | 54.04 | 101.91375 | 54.04 | 93.35168 |
| 54.06 | 107.03213 | 54.06 | 129.75792 | 54.06 | 128.52953 | 54.06 | 101.89053 | 54.06 | 92.34449 |
| 54.08 | 107.90589 | 54.08 | 128.11687 | 54.08 | 129.14844 | 54.08 | 101.55115 | 54.08 | 92.16952 |
| 54.1 | 107.56498 | 54.1 | 128.67388 | 54.1 | 129.63127 | 54.1 | 99.87633 | 54.1 | 91.40431 |
| 54.12 | 108.54557 | 54.12 | 128.20823 | 54.12 | 129.60788 | 54.12 | 98.93425 | 54.12 | 90.68726 |
| 54.14 | 106.96851 | 54.14 | 130.76776 | 54.14 | 129.56278 | 54.14 | 98.44349 | 54.14 | 89.05471 |
| 54.16 | 107.30129 | 54.16 | 132.89731 | 54.16 | 129.90291 | 54.16 | 97.43989 | 54.16 | 86.72113 |
| 54.18 | 107.18541 | 54.18 | 132.32351 | 54.18 | 129.46463 | 54.18 | 96.45042 | 54.18 | 86.38327 |
| 54.2 | 107.28866 | 54.2 | 130.59074 | 54.2 | 132.56719 | 54.2 | 96.36849 | 54.2 | 85.80268 |
| 54.22 | 107.66296 | 54.22 | 129.55221 | 54.22 | 132.06452 | 54.22 | 98.07445 | 54.22 | 85.53633 |
| 54.24 | 105.67973 | 54.24 | 130.86349 | 54.24 | 135.22656 | 54.24 | 99.87574 | 54.24 | 87.18435 |
| 54.26 | 103.73799 | 54.26 | 132.28992 | 54.26 | 137.00124 | 54.26 | 100.34989 | 54.26 | 87.613 |
| 54.28 | 103.96677 | 54.28 | 134.2605 | 54.28 | 137.04466 | 54.28 | 100.33102 | 54.28 | 89.15891 |
| 54.3 | 106.14782 | 54.3 | 133.43639 | 54.3 | 138.98447 | 54.3 | 100.47562 | 54.3 | 89.19722 |
| 54.32 | 105.82316 | 54.32 | 134.99718 | 54.32 | 140.44165 | 54.32 | 102.69633 | 54.32 | 88.93031 |
| 54.34 | 104.32464 | 54.34 | 135.6316 | 54.34 | 139.496 | 54.34 | 103.7024 | 54.34 | 90.47413 |
| 54.36 | 102.91768 | 54.36 | 133.1993 | 54.36 | 141.19384 | 54.36 | 103.22373 | 54.36 | 91.99361 |
| 54.38 | 100.80307 | 54.38 | 134.41355 | 54.38 | 144.05893 | 54.38 | 105.28191 | 54.38 | 92.70654 |
| 54.4 | 99.51954 | 54.4 | 133.59698 | 54.4 | 146.6226 | 54.4 | 105.55203 | 54.4 | 93.20504 |
| 54.42 | 98.69128 | 54.42 | 135.02264 | 54.42 | 147.63431 | 54.42 | 106.56454 | 54.42 | 93.98309 |
| 54.44 | 99.9814 | 54.44 | 136.01376 | 54.44 | 149.43011 | 54.44 | 109.52365 | 54.44 | 93.86776 |
| 54.46 | 100.9871 | 54.46 | 136.82369 | 54.46 | 151.10153 | 54.46 | 110.92044 | 54.46 | 93.5418 |
| 54.48 | 101.74343 | 54.48 | 135.92991 | 54.48 | 151.98262 | 54.48 | 109.84831 | 54.48 | 94.00425 |
| 54.5 | 102.6019 | 54.5 | 136.29419 | 54.5 | 156.32456 | 54.5 | 108.60443 | 54.5 | 93.21997 |
| 54.52 | 103.88637 | 54.52 | 135.7262 | 54.52 | 156.86687 | 54.52 | 111.47294 | 54.52 | 91.13138 |
| 54.54 | 104.44829 | 54.54 | 136.66016 | 54.54 | 157.98636 | 54.54 | 111.16339 | 54.54 | 92.37036 |
| 54.56 | 104.73538 | 54.56 | 134.37339 | 54.56 | 158.95221 | 54.56 | 111.60301 | 54.56 | 93.4036 |
| 54.58 | 103.8135 | 54.58 | 134.94458 | 54.58 | 155.85023 | 54.58 | 111.55431 | 54.58 | 91.7301 |
| 54.6 | 102.3116 | 54.6 | 135.08614 | 54.6 | 155.46555 | 54.6 | 111.94768 | 54.6 | 92.94399 |
| 54.62 | 103.15024 | 54.62 | 133.93965 | 54.62 | 154.59936 | 54.62 | 111.79706 | 54.62 | 92.28014 |
| 54.64 | 105.9206 | 54.64 | 131.34239 | 54.64 | 152.05667 | 54.64 | 113.20951 | 54.64 | 93.03495 |
| 54.66 | 105.69504 | 54.66 | 130.72005 | 54.66 | 152.83375 | 54.66 | 112.87181 | 54.66 | 92.04153 |
| 54.68 | 106.14012 | 54.68 | 131.00717 | 54.68 | 153.02722 | 54.68 | 112.52282 | 54.68 | 92.19857 |
| 54.7 | 108.02372 | 54.7 | 130.77747 | 54.7 | 149.52149 | 54.7 | 113.31294 | 54.7 | 93.65426 |
| 54.72 | 106.98217 | 54.72 | 128.94673 | 54.72 | 148.88161 | 54.72 | 116.18013 | 54.72 | 94.84926 |
| 54.74 | 106.15486 | 54.74 | 129.65663 | 54.74 | 150.23839 | 54.74 | 116.00043 | 54.74 | 96.73097 |
| 54.76 | 105.43987 | 54.76 | 133.62313 | 54.76 | 151.668 | 54.76 | 116.34037 | 54.76 | 96.36384 |
| 54.78 | 104.71658 | 54.78 | 135.38215 | 54.78 | 150.53452 | 54.78 | 116.29526 | 54.78 | 95.39798 |
| 54.8 | 104.49197 | 54.8 | 137.33481 | 54.8 | 150.42693 | 54.8 | 115.83753 | 54.8 | 93.67446 |
| 54.82 | 103.55991 | 54.82 | 136.98203 | 54.82 | 151.32521 | 54.82 | 115.87377 | 54.82 | 92.95776 |
| 54.84 | 106.56545 | 54.84 | 138.66741 | 54.84 | 150.76725 | 54.84 | 115.18292 | 54.84 | 93.27354 |
| 54.86 | 107.08793 | 54.86 | 139.12779 | 54.86 | 147.85401 | 54.86 | 114.47905 | 54.86 | 93.78771 |
| 54.88 | 107.40088 | 54.88 | 139.0085 | 54.88 | 144.97944 | 54.88 | 112.60604 | 54.88 | 91.5553 |
| 54.9 | 106.98846 | 54.9 | 139.92641 | 54.9 | 143.09076 | 54.9 | 112.21116 | 54.9 | 92.59383 |
| 54.92 | 104.74077 | 54.92 | 140.1114 | 54.92 | 140.49859 | 54.92 | 112.90427 | 54.92 | 93.02798 |
| 54.94 | 105.38971 | 54.94 | 137.89468 | 54.94 | 139.92778 | 54.94 | 110.44366 | 54.94 | 91.97926 |
| 54.96 | 103.23922 | 54.96 | 137.92867 | 54.96 | 137.44224 | 54.96 | 110.91555 | 54.96 | 91.90621 |
| 54.98 | 102.75111 | 54.98 | 139.99137 | 54.98 | 135.71872 | 54.98 | 111.72453 | 54.98 | 91.56022 |
| 55 | 103.05424 | 55 | 140.46079 | 55 | 135.59509 | 55 | 112.05295 | 55 | 90.45298 |
| 55.02 | 100.38769 | 55.02 | 140.22863 | 55.02 | 136.00035 | 55.02 | 109.17972 | 55.02 | 89.02656 |
| 55.04 | 101.10722 | 55.04 | 140.05704 | 55.04 | 134.72796 | 55.04 | 107.47223 | 55.04 | 88.33893 |
| 55.06 | 101.67574 | 55.06 | 139.82223 | 55.06 | 133.91819 | 55.06 | 107.02488 | 55.06 | 86.1741 |
| 55.08 | 101.13156 | 55.08 | 140.01816 | 55.08 | 132.88643 | 55.08 | 104.72073 | 55.08 | 83.25727 |
| 55.1 | 101.26348 | 55.1 | 139.85888 | 55.1 | 131.91965 | 55.1 | 102.47624 | 55.1 | 81.88936 |
| 55.12 | 101.38505 | 55.12 | 135.99792 | 55.12 | 132.29772 | 55.12 | 101.91016 | 55.12 | 80.22398 |
| 55.14 | 99.74797 | 55.14 | 136.53172 | 55.14 | 133.0716 | 55.14 | 102.02018 | 55.14 | 80.93784 |
| 55.16 | 100.81407 | 55.16 | 136.08249 | 55.16 | 133.31472 | 55.16 | 101.51903 | 55.16 | 82.83804 |
| 55.18 | 100.6042 | 55.18 | 133.9067 | 55.18 | 134.60522 | 55.18 | 100.81194 | 55.18 | 83.67934 |
| 55.2 | 101.08287 | 55.2 | 135.72232 | 55.2 | 136.68625 | 55.2 | 100.71681 | 55.2 | 83.60063 |
| 55.22 | 100.50567 | 55.22 | 137.46529 | 55.22 | 136.6536 | 55.22 | 100.13506 | 55.22 | 82.82956 |
| 55.24 | 101.50116 | 55.24 | 137.10666 | 55.24 | 137.55982 | 55.24 | 98.87983 | 55.24 | 83.40132 |
| 55.26 | 102.03097 | 55.26 | 136.98114 | 55.26 | 137.57359 | 55.26 | 98.06102 | 55.26 | 82.62232 |
| 55.28 | 103.27564 | 55.28 | 137.51398 | 55.28 | 134.46216 | 55.28 | 97.55668 | 55.28 | 82.75672 |
| 55.3 | 103.08179 | 55.3 | 137.07155 | 55.3 | 136.10054 | 55.3 | 97.37245 | 55.3 | 81.3184 |
| 55.32 | 102.01532 | 55.32 | 137.59459 | 55.32 | 135.57034 | 55.32 | 97.19765 | 55.32 | 82.55286 |
| 55.34 | 101.76503 | 55.34 | 135.12832 | 55.34 | 135.01558 | 55.34 | 95.64118 | 55.34 | 83.96097 |
| 55.36 | 100.99718 | 55.36 | 132.61391 | 55.36 | 137.43881 | 55.36 | 95.2097 | 55.36 | 80.63133 |
| 55.38 | 103.29508 | 55.38 | 134.4688 | 55.38 | 136.65999 | 55.38 | 95.68877 | 55.38 | 79.59866 |
| 55.4 | 105.05729 | 55.4 | 136.14248 | 55.4 | 137.00976 | 55.4 | 95.79109 | 55.4 | 80.88106 |
| 55.42 | 106.73909 | 55.42 | 135.7374 | 55.42 | 139.14099 | 55.42 | 94.51623 | 55.42 | 80.86766 |
| 55.44 | 108.37937 | 55.44 | 134.38969 | 55.44 | 139.10835 | 55.44 | 92.7727 | 55.44 | 79.79724 |
| 55.46 | 110.16141 | 55.46 | 133.03537 | 55.46 | 137.06 | 55.46 | 90.63431 | 55.46 | 77.0888 |
| 55.48 | 109.73237 | 55.48 | 131.03796 | 55.48 | 136.67872 | 55.48 | 89.00008 | 55.48 | 78.4952 |
| 55.5 | 109.37317 | 55.5 | 129.91809 | 55.5 | 134.61621 | 55.5 | 89.38873 | 55.5 | 79.54145 |
| 55.52 | 109.3777 | 55.52 | 129.77577 | 55.52 | 132.06539 | 55.52 | 89.79135 | 55.52 | 80.79346 |
| 55.54 | 109.86978 | 55.54 | 129.31994 | 55.54 | 131.86549 | 55.54 | 87.08726 | 55.54 | 81.99602 |
| 55.56 | 109.47321 | 55.56 | 125.82949 | 55.56 | 130.22616 | 55.56 | 86.74618 | 55.56 | 80.11149 |
| 55.58 | 108.37864 | 55.58 | 126.42106 | 55.58 | 127.08981 | 55.58 | 86.08196 | 55.58 | 80.94218 |
| 55.6 | 108.24727 | 55.6 | 124.81078 | 55.6 | 129.12157 | 55.6 | 86.70769 | 55.6 | 81.51863 |
| 55.62 | 109.49173 | 55.62 | 123.56425 | 55.62 | 127.00753 | 55.62 | 85.94097 | 55.62 | 82.72666 |
| 55.64 | 108.82825 | 55.64 | 120.36731 | 55.64 | 128.48718 | 55.64 | 88.10107 | 55.64 | 82.32763 |
| 55.66 | 107.3386 | 55.66 | 121.94079 | 55.66 | 131.15579 | 55.66 | 90.93842 | 55.66 | 82.62039 |
| 55.68 | 108.05832 | 55.68 | 119.84372 | 55.68 | 129.01647 | 55.68 | 93.11572 | 55.68 | 86.28091 |
| 55.7 | 107.8186 | 55.7 | 120.28994 | 55.7 | 127.94775 | 55.7 | 91.8235 | 55.7 | 89.38876 |
| 55.72 | 107.68118 | 55.72 | 118.46241 | 55.72 | 127.56062 | 55.72 | 90.50429 | 55.72 | 90.8633 |
| 55.74 | 107.52414 | 55.74 | 119.68328 | 55.74 | 127.31277 | 55.74 | 91.77669 | 55.74 | 92.19497 |
| 55.76 | 108.67422 | 55.76 | 119.38508 | 55.76 | 126.68762 | 55.76 | 91.47449 | 55.76 | 97.34154 |
| 55.78 | 107.03603 | 55.78 | 119.58554 | 55.78 | 127.18819 | 55.78 | 92.67385 | 55.78 | 99.23248 |
| 55.8 | 105.90217 | 55.8 | 118.94716 | 55.8 | 125.71175 | 55.8 | 94.66011 | 55.8 | 101.53961 |
| 55.82 | 106.25305 | 55.82 | 118.88488 | 55.82 | 128.44002 | 55.82 | 95.92382 | 55.82 | 107.81985 |
| 55.84 | 104.52595 | 55.84 | 120.32526 | 55.84 | 128.82017 | 55.84 | 97.63224 | 55.84 | 113.42754 |
| 55.86 | 104.35928 | 55.86 | 120.73223 | 55.86 | 128.17257 | 55.86 | 98.60111 | 55.86 | 118.28457 |
| 55.88 | 103.0076 | 55.88 | 121.52632 | 55.88 | 130.83816 | 55.88 | 99.62756 | 55.88 | 122.02813 |
| 55.9 | 100.88355 | 55.9 | 120.01949 | 55.9 | 137.46782 | 55.9 | 101.28671 | 55.9 | 128.84238 |
| 55.92 | 99.25438 | 55.92 | 122.04409 | 55.92 | 141.45754 | 55.92 | 104.06121 | 55.92 | 132.80548 |
| 55.94 | 98.851 | 55.94 | 123.07696 | 55.94 | 144.40361 | 55.94 | 106.72436 | 55.94 | 136.13889 |
| 55.96 | 97.04478 | 55.96 | 126.28692 | 55.96 | 148.56073 | 55.96 | 110.30655 | 55.96 | 140.27055 |
| 55.98 | 97.20597 | 55.98 | 129.27301 | 55.98 | 155.45143 | 55.98 | 113.97368 | 55.98 | 145.48867 |
| 56 | 95.99378 | 56 | 130.81985 | 56 | 158.44791 | 56 | 116.18835 | 56 | 147.85659 |
| 56.02 | 96.50133 | 56.02 | 132.25932 | 56.02 | 161.74752 | 56.02 | 117.29447 | 56.02 | 153.03847 |
| 56.04 | 99.30586 | 56.04 | 132.5315 | 56.04 | 165.44974 | 56.04 | 117.71576 | 56.04 | 154.69102 |
| 56.06 | 98.60444 | 56.06 | 132.31537 | 56.06 | 170.68128 | 56.06 | 120.5635 | 56.06 | 157.39795 |
| 56.08 | 98.85341 | 56.08 | 134.01378 | 56.08 | 174.77104 | 56.08 | 121.39401 | 56.08 | 160.04183 |
| 56.1 | 100.20471 | 56.1 | 134.31355 | 56.1 | 180.16454 | 56.1 | 122.40688 | 56.1 | 165.49194 |
| 56.12 | 99.4714 | 56.12 | 135.86379 | 56.12 | 183.99305 | 56.12 | 123.42069 | 56.12 | 168.55562 |
| 56.14 | 100.17564 | 56.14 | 138.51504 | 56.14 | 187.37215 | 56.14 | 126.15556 | 56.14 | 171.82089 |
| 56.16 | 100.85253 | 56.16 | 140.29158 | 56.16 | 189.74669 | 56.16 | 128.2362 | 56.16 | 173.35641 |
| 56.18 | 100.35536 | 56.18 | 141.47808 | 56.18 | 191.03911 | 56.18 | 128.55841 | 56.18 | 172.79581 |
| 56.2 | 99.84402 | 56.2 | 143.27181 | 56.2 | 193.21207 | 56.2 | 130.51297 | 56.2 | 172.7826 |
| 56.22 | 99.59053 | 56.22 | 143.21801 | 56.22 | 193.39441 | 56.22 | 130.22077 | 56.22 | 171.61856 |
| 56.24 | 99.99446 | 56.24 | 144.04853 | 56.24 | 192.21507 | 56.24 | 131.97922 | 56.24 | 172.20425 |
| 56.26 | 98.55671 | 56.26 | 147.01764 | 56.26 | 193.15168 | 56.26 | 131.98866 | 56.26 | 171.4766 |
| 56.28 | 98.32229 | 56.28 | 147.33832 | 56.28 | 192.91857 | 56.28 | 132.66138 | 56.28 | 169.3969 |
| 56.3 | 97.91684 | 56.3 | 147.59483 | 56.3 | 195.05659 | 56.3 | 132.30672 | 56.3 | 166.85683 |
| 56.32 | 98.18394 | 56.32 | 146.46419 | 56.32 | 192.89177 | 56.32 | 131.46676 | 56.32 | 163.65877 |
| 56.34 | 97.92687 | 56.34 | 146.7156 | 56.34 | 193.33514 | 56.34 | 129.87141 | 56.34 | 160.29856 |
| 56.36 | 96.5335 | 56.36 | 147.73507 | 56.36 | 190.81696 | 56.36 | 128.6749 | 56.36 | 155.55705 |
| 56.38 | 96.55672 | 56.38 | 147.41041 | 56.38 | 186.90786 | 56.38 | 125.78506 | 56.38 | 152.50169 |
| 56.4 | 95.6675 | 56.4 | 144.26537 | 56.4 | 184.4733 | 56.4 | 121.95466 | 56.4 | 147.84737 |
| 56.42 | 96.13183 | 56.42 | 142.9388 | 56.42 | 180.43886 | 56.42 | 117.1686 | 56.42 | 140.54692 |
| 56.44 | 95.0548 | 56.44 | 141.90065 | 56.44 | 175.12596 | 56.44 | 115.26522 | 56.44 | 135.85561 |
| 56.46 | 93.86263 | 56.46 | 140.32982 | 56.46 | 173.12402 | 56.46 | 113.61212 | 56.46 | 130.7547 |
| 56.48 | 91.12531 | 56.48 | 139.03289 | 56.48 | 170.03995 | 56.48 | 111.67284 | 56.48 | 127.73462 |
| 56.5 | 91.1808 | 56.5 | 137.64159 | 56.5 | 165.39298 | 56.5 | 111.02183 | 56.5 | 121.23692 |
| 56.52 | 92.02021 | 56.52 | 138.37377 | 56.52 | 161.7417 | 56.52 | 110.39742 | 56.52 | 114.48611 |
| 56.54 | 89.72006 | 56.54 | 137.11723 | 56.54 | 157.27349 | 56.54 | 108.90626 | 56.54 | 108.54392 |
| 56.56 | 88.87161 | 56.56 | 134.68795 | 56.56 | 151.62764 | 56.56 | 108.64104 | 56.56 | 104.1801 |
| 56.58 | 88.8384 | 56.58 | 133.29495 | 56.58 | 148.15059 | 56.58 | 106.00225 | 56.58 | 101.87805 |
| 56.6 | 88.88445 | 56.6 | 131.96347 | 56.6 | 143.28903 | 56.6 | 104.87839 | 56.6 | 96.87852 |
| 56.62 | 89.6538 | 56.62 | 129.72069 | 56.62 | 139.01881 | 56.62 | 103.75642 | 56.62 | 93.30709 |
| 56.64 | 89.5077 | 56.64 | 127.41204 | 56.64 | 135.6714 | 56.64 | 103.40986 | 56.64 | 89.09617 |
| 56.66 | 90.00186 | 56.66 | 127.06153 | 56.66 | 128.83884 | 56.66 | 101.52099 | 56.66 | 87.95176 |
| 56.68 | 89.34744 | 56.68 | 122.58539 | 56.68 | 124.57563 | 56.68 | 98.20248 | 56.68 | 87.28111 |
| 56.7 | 88.35101 | 56.7 | 120.19937 | 56.7 | 120.69765 | 56.7 | 95.05443 | 56.7 | 82.37878 |
| 56.72 | 87.40081 | 56.72 | 116.21496 | 56.72 | 117.43501 | 56.72 | 95.21486 | 56.72 | 77.72728 |
| 56.74 | 86.34491 | 56.74 | 116.70347 | 56.74 | 115.05801 | 56.74 | 95.25676 | 56.74 | 78.02928 |
| 56.76 | 86.55575 | 56.76 | 116.62419 | 56.76 | 113.28975 | 56.76 | 92.84937 | 56.76 | 78.08345 |
| 56.78 | 86.16503 | 56.78 | 114.61603 | 56.78 | 112.51924 | 56.78 | 94.91322 | 56.78 | 75.07639 |
| 56.8 | 85.0657 | 56.8 | 113.04501 | 56.8 | 112.06775 | 56.8 | 94.15102 | 56.8 | 75.41275 |
| 56.82 | 85.09289 | 56.82 | 113.61318 | 56.82 | 114.64219 | 56.82 | 91.81158 | 56.82 | 76.87542 |
| 56.84 | 86.57367 | 56.84 | 113.06862 | 56.84 | 112.78087 | 56.84 | 91.92975 | 56.84 | 76.54774 |
| 56.86 | 88.08936 | 56.86 | 112.08672 | 56.86 | 112.93662 | 56.86 | 91.84387 | 56.86 | 74.65002 |
| 56.88 | 87.85492 | 56.88 | 112.46762 | 56.88 | 115.9867 | 56.88 | 92.14249 | 56.88 | 75.59419 |
| 56.9 | 87.59425 | 56.9 | 112.48008 | 56.9 | 117.07563 | 56.9 | 92.23045 | 56.9 | 74.94471 |
| 56.92 | 88.43401 | 56.92 | 114.02618 | 56.92 | 116.15357 | 56.92 | 90.89293 | 56.92 | 73.34557 |
| 56.94 | 89.32003 | 56.94 | 112.08011 | 56.94 | 117.77496 | 56.94 | 89.66189 | 56.94 | 72.96466 |
| 56.96 | 89.91216 | 56.96 | 112.1711 | 56.96 | 117.94447 | 56.96 | 88.92009 | 56.96 | 73.68002 |
| 56.98 | 91.78668 | 56.98 | 111.15786 | 56.98 | 118.53983 | 56.98 | 87.86664 | 56.98 | 75.50112 |
| 57 | 91.76177 | 57 | 111.35077 | 57 | 116.47165 | 57 | 85.71749 | 57 | 76.31164 |
| 57.02 | 94.70634 | 57.02 | 109.97494 | 57.02 | 119.03043 | 57.02 | 82.29689 | 57.02 | 79.51556 |
| 57.04 | 95.76657 | 57.04 | 109.48323 | 57.04 | 121.76002 | 57.04 | 82.14606 | 57.04 | 78.8385 |
| 57.06 | 95.91172 | 57.06 | 108.59192 | 57.06 | 121.53617 | 57.06 | 83.23046 | 57.06 | 78.8685 |
| 57.08 | 95.23616 | 57.08 | 109.95019 | 57.08 | 122.16795 | 57.08 | 81.80611 | 57.08 | 80.98369 |
| 57.1 | 94.3207 | 57.1 | 108.99623 | 57.1 | 121.69078 | 57.1 | 81.17134 | 57.1 | 82.81252 |
| 57.12 | 93.77368 | 57.12 | 108.45299 | 57.12 | 120.22472 | 57.12 | 81.57054 | 57.12 | 83.20457 |
| 57.14 | 94.71804 | 57.14 | 109.56909 | 57.14 | 120.90159 | 57.14 | 81.80705 | 57.14 | 84.76973 |
| 57.16 | 93.88865 | 57.16 | 111.31788 | 57.16 | 122.0545 | 57.16 | 81.32762 | 57.16 | 83.27557 |
| 57.18 | 94.3562 | 57.18 | 111.81807 | 57.18 | 122.68628 | 57.18 | 79.71773 | 57.18 | 83.57399 |
| 57.2 | 94.25239 | 57.2 | 110.52944 | 57.2 | 124.9134 | 57.2 | 79.89288 | 57.2 | 85.63878 |
| 57.22 | 93.7216 | 57.22 | 113.31433 | 57.22 | 123.48434 | 57.22 | 78.31791 | 57.22 | 85.73334 |
| 57.24 | 91.96845 | 57.24 | 113.79263 | 57.24 | 123.40488 | 57.24 | 79.36589 | 57.24 | 87.5167 |
| 57.26 | 90.84989 | 57.26 | 114.50045 | 57.26 | 126.8153 | 57.26 | 77.95532 | 57.26 | 87.53124 |
| 57.28 | 92.08228 | 57.28 | 112.38905 | 57.28 | 126.97668 | 57.28 | 77.25504 | 57.28 | 86.23395 |
| 57.3 | 92.45055 | 57.3 | 114.34549 | 57.3 | 126.87098 | 57.3 | 74.45693 | 57.3 | 87.05428 |
| 57.32 | 92.98889 | 57.32 | 115.97991 | 57.32 | 125.24391 | 57.32 | 73.7508 | 57.32 | 86.8491 |
| 57.34 | 91.6846 | 57.34 | 116.88537 | 57.34 | 125.72314 | 57.34 | 73.78421 | 57.34 | 87.37969 |
| 57.36 | 90.86295 | 57.36 | 117.16189 | 57.36 | 123.7431 | 57.36 | 74.46468 | 57.36 | 86.06179 |
| 57.38 | 91.59872 | 57.38 | 116.98333 | 57.38 | 123.27911 | 57.38 | 74.22912 | 57.38 | 84.62857 |
| 57.4 | 91.92922 | 57.4 | 117.89086 | 57.4 | 122.65545 | 57.4 | 72.53032 | 57.4 | 84.90755 |
| 57.42 | 92.69614 | 57.42 | 119.46487 | 57.42 | 123.35025 | 57.42 | 72.37819 | 57.42 | 86.25847 |
| 57.44 | 91.34844 | 57.44 | 118.56789 | 57.44 | 123.45463 | 57.44 | 75.94246 | 57.44 | 88.5407 |
| 57.46 | 91.41753 | 57.46 | 119.81877 | 57.46 | 121.59426 | 57.46 | 77.42021 | 57.46 | 86.89289 |
| 57.48 | 91.38092 | 57.48 | 122.28523 | 57.48 | 121.13558 | 57.48 | 78.56538 | 57.48 | 87.02729 |
| 57.5 | 92.5429 | 57.5 | 124.28224 | 57.5 | 120.40982 | 57.5 | 78.76395 | 57.5 | 88.42747 |
| 57.52 | 91.61459 | 57.52 | 125.99311 | 57.52 | 119.16556 | 57.52 | 79.3608 | 57.52 | 89.671 |
| 57.54 | 89.74837 | 57.54 | 124.32848 | 57.54 | 119.58931 | 57.54 | 78.80718 | 57.54 | 92.25845 |
| 57.56 | 90.91581 | 57.56 | 123.38187 | 57.56 | 118.34219 | 57.56 | 80.29192 | 57.56 | 93.0599 |
| 57.58 | 90.42751 | 57.58 | 124.35 | 57.58 | 119.35711 | 57.58 | 82.56264 | 57.58 | 92.61745 |
| 57.6 | 89.78537 | 57.6 | 124.55799 | 57.6 | 118.19985 | 57.6 | 84.51891 | 57.6 | 92.57366 |
| 57.62 | 88.46408 | 57.62 | 122.62968 | 57.62 | 115.25357 | 57.62 | 84.48871 | 57.62 | 92.55838 |
| 57.64 | 88.4707 | 57.64 | 121.65063 | 57.64 | 114.26409 | 57.64 | 86.25488 | 57.64 | 92.34773 |
| 57.66 | 88.15509 | 57.66 | 119.33045 | 57.66 | 114.57252 | 57.66 | 88.1043 | 57.66 | 92.43191 |
| 57.68 | 87.06956 | 57.68 | 119.03373 | 57.68 | 115.02837 | 57.68 | 88.6145 | 57.68 | 92.76469 |
| 57.7 | 88.05903 | 57.7 | 118.76837 | 57.7 | 112.19648 | 57.7 | 87.87799 | 57.7 | 89.5113 |
| 57.72 | 89.42901 | 57.72 | 117.89462 | 57.72 | 113.98323 | 57.72 | 88.46766 | 57.72 | 90.59116 |
| 57.74 | 90.86696 | 57.74 | 119.2412 | 57.74 | 114.82263 | 57.74 | 90.15966 | 57.74 | 92.39718 |
| 57.76 | 92.01214 | 57.76 | 117.9337 | 57.76 | 113.07779 | 57.76 | 91.18572 | 57.76 | 93.35323 |
| 57.78 | 92.23185 | 57.78 | 117.12413 | 57.78 | 113.63255 | 57.78 | 92.7539 | 57.78 | 93.17995 |
| 57.8 | 93.22244 | 57.8 | 118.38691 | 57.8 | 111.54417 | 57.8 | 91.94678 | 57.8 | 91.35961 |
| 57.82 | 96.21441 | 57.82 | 118.74027 | 57.82 | 111.1576 | 57.82 | 92.64159 | 57.82 | 90.17121 |
| 57.84 | 97.65819 | 57.84 | 118.10115 | 57.84 | 111.44564 | 57.84 | 92.69803 | 57.84 | 87.56695 |
| 57.86 | 97.27256 | 57.86 | 115.36723 | 57.86 | 111.6667 | 57.86 | 92.21047 | 57.86 | 87.3446 |
| 57.88 | 96.40242 | 57.88 | 113.67599 | 57.88 | 111.54173 | 57.88 | 91.077 | 57.88 | 87.22134 |
| 57.9 | 97.00662 | 57.9 | 110.83714 | 57.9 | 111.4147 | 57.9 | 90.52376 | 57.9 | 84.64428 |
| 57.92 | 96.0383 | 57.92 | 109.87128 | 57.92 | 113.35529 | 57.92 | 89.34272 | 57.92 | 84.44154 |
| 57.94 | 96.44053 | 57.94 | 108.94147 | 57.94 | 113.31243 | 57.94 | 88.45539 | 57.94 | 85.55331 |
| 57.96 | 95.7548 | 57.96 | 109.05813 | 57.96 | 112.63291 | 57.96 | 88.49636 | 57.96 | 86.44593 |
| 57.98 | 96.13626 | 57.98 | 108.58625 | 57.98 | 114.43365 | 57.98 | 88.05203 | 57.98 | 86.68302 |
| 58 | 95.22269 | 58 | 107.43898 | 58 | 115.84912 | 58 | 87.07617 | 58 | 86.04445 |
| 58.02 | 95.1468 | 58.02 | 105.39816 | 58.02 | 117.47523 | 58.02 | 86.39778 | 58.02 | 85.21997 |
| 58.04 | 94.72814 | 58.04 | 105.49009 | 58.04 | 117.05354 | 58.04 | 87.19545 | 58.04 | 82.45753 |
| 58.06 | 94.18301 | 58.06 | 104.90117 | 58.06 | 116.52618 | 58.06 | 86.50932 | 58.06 | 82.31143 |
| 58.08 | 92.83981 | 58.08 | 104.54745 | 58.08 | 117.75762 | 58.08 | 85.27544 | 58.08 | 84.13632 |
| 58.1 | 93.51405 | 58.1 | 101.99852 | 58.1 | 119.15346 | 58.1 | 84.12649 | 58.1 | 83.76994 |
| 58.12 | 95.12903 | 58.12 | 100.9615 | 58.12 | 118.72537 | 58.12 | 83.99473 | 58.12 | 83.35262 |
| 58.14 | 95.36139 | 58.14 | 100.32841 | 58.14 | 121.16654 | 58.14 | 84.34374 | 58.14 | 84.05912 |
| 58.16 | 95.73738 | 58.16 | 98.84686 | 58.16 | 123.61714 | 58.16 | 82.86504 | 58.16 | 81.41827 |
| 58.18 | 96.38651 | 58.18 | 98.72911 | 58.18 | 121.88551 | 58.18 | 82.4073 | 58.18 | 84.45928 |
| 58.2 | 95.126 | 58.2 | 98.75214 | 58.2 | 122.9214 | 58.2 | 81.22418 | 58.2 | 85.35907 |
| 58.22 | 94.2849 | 58.22 | 99.55622 | 58.22 | 123.04523 | 58.22 | 79.82079 | 58.22 | 83.70689 |
| 58.24 | 94.89364 | 58.24 | 97.89877 | 58.24 | 124.68984 | 58.24 | 79.96348 | 58.24 | 85.04498 |
| 58.26 | 96.83592 | 58.26 | 97.26116 | 58.26 | 122.76492 | 58.26 | 79.44515 | 58.26 | 84.14178 |
| 58.28 | 97.22627 | 58.28 | 96.43158 | 58.28 | 120.60368 | 58.28 | 78.85227 | 58.28 | 82.46414 |
| 58.3 | 96.54373 | 58.3 | 98.30496 | 58.3 | 120.80282 | 58.3 | 78.32733 | 58.3 | 85.72807 |
| 58.32 | 96.34024 | 58.32 | 99.89013 | 58.32 | 120.31356 | 58.32 | 79.26716 | 58.32 | 85.57216 |
| 58.34 | 93.01985 | 58.34 | 100.04548 | 58.34 | 121.10048 | 58.34 | 80.15487 | 58.34 | 84.28106 |
| 58.36 | 92.16723 | 58.36 | 99.35558 | 58.36 | 120.75883 | 58.36 | 80.43724 | 58.36 | 85.43435 |
| 58.38 | 92.47624 | 58.38 | 99.03583 | 58.38 | 119.33676 | 58.38 | 79.08387 | 58.38 | 86.35907 |
| 58.4 | 91.66403 | 58.4 | 99.03055 | 58.4 | 120.00119 | 58.4 | 77.83166 | 58.4 | 87.7955 |
| 58.42 | 92.31108 | 58.42 | 101.08042 | 58.42 | 118.03323 | 58.42 | 81.0724 | 58.42 | 88.81705 |
| 58.44 | 90.43825 | 58.44 | 102.78261 | 58.44 | 116.96243 | 58.44 | 81.6919 | 58.44 | 88.07695 |
| 58.46 | 90.77932 | 58.46 | 103.84323 | 58.46 | 116.86068 | 58.46 | 79.32757 | 58.46 | 86.49989 |
| 58.48 | 90.38557 | 58.48 | 105.32213 | 58.48 | 118.14441 | 58.48 | 79.84494 | 58.48 | 88.14808 |
| 58.5 | 89.20699 | 58.5 | 105.10658 | 58.5 | 115.46014 | 58.5 | 80.07144 | 58.5 | 88.74094 |
| 58.52 | 88.88611 | 58.52 | 104.80402 | 58.52 | 115.7057 | 58.52 | 81.89783 | 58.52 | 88.87005 |
| 58.54 | 90.13699 | 58.54 | 105.55734 | 58.54 | 115.70854 | 58.54 | 83.73346 | 58.54 | 90.74383 |
| 58.56 | 92.21066 | 58.56 | 106.69308 | 58.56 | 114.70643 | 58.56 | 84.55548 | 58.56 | 92.79351 |
| 58.58 | 92.79316 | 58.58 | 108.30186 | 58.58 | 115.86634 | 58.58 | 85.15553 | 58.58 | 93.23218 |
| 58.6 | 91.32616 | 58.6 | 109.32887 | 58.6 | 113.83288 | 58.6 | 84.35502 | 58.6 | 93.30146 |
| 58.62 | 90.58454 | 58.62 | 111.05032 | 58.62 | 113.36743 | 58.62 | 84.4292 | 58.62 | 94.64577 |
| 58.64 | 91.82448 | 58.64 | 110.72491 | 58.64 | 116.01111 | 58.64 | 86.15517 | 58.64 | 95.72583 |
| 58.66 | 91.57022 | 58.66 | 112.78307 | 58.66 | 116.41998 | 58.66 | 85.8258 | 58.66 | 96.10146 |
| 58.68 | 91.4481 | 58.68 | 115.01398 | 58.68 | 114.3552 | 58.68 | 86.09534 | 58.68 | 96.70869 |
| 58.7 | 92.32224 | 58.7 | 115.42868 | 58.7 | 113.5145 | 58.7 | 86.29411 | 58.7 | 95.09087 |
| 58.72 | 91.86923 | 58.72 | 117.6305 | 58.72 | 114.60436 | 58.72 | 87.19918 | 58.72 | 96.44633 |
| 58.74 | 91.07325 | 58.74 | 121.17551 | 58.74 | 113.15548 | 58.74 | 88.34794 | 58.74 | 97.34179 |
| 58.76 | 91.48436 | 58.76 | 123.12251 | 58.76 | 112.01275 | 58.76 | 88.78754 | 58.76 | 95.27624 |
| 58.78 | 89.66362 | 58.78 | 125.61369 | 58.78 | 112.83741 | 58.78 | 89.20072 | 58.78 | 92.25108 |
| 58.8 | 89.31443 | 58.8 | 125.3064 | 58.8 | 114.65284 | 58.8 | 89.36362 | 58.8 | 91.84337 |
| 58.82 | 87.88008 | 58.82 | 125.18616 | 58.82 | 117.17461 | 58.82 | 91.04825 | 58.82 | 92.35491 |
| 58.84 | 85.94138 | 58.84 | 126.33096 | 58.84 | 117.29521 | 58.84 | 91.26342 | 58.84 | 90.14723 |
| 58.86 | 85.23337 | 58.86 | 125.12235 | 58.86 | 115.43805 | 58.86 | 89.9797 | 58.86 | 91.97251 |
| 58.88 | 84.45173 | 58.88 | 126.08895 | 58.88 | 116.11113 | 58.88 | 89.88682 | 58.88 | 91.35623 |
| 58.9 | 85.26337 | 58.9 | 125.98061 | 58.9 | 118.25463 | 58.9 | 90.56653 | 58.9 | 90.26675 |
| 58.92 | 84.62896 | 58.92 | 129.51805 | 58.92 | 119.81524 | 58.92 | 90.25565 | 58.92 | 90.27279 |
| 58.94 | 86.29077 | 58.94 | 129.10013 | 58.94 | 119.47756 | 58.94 | 90.15655 | 58.94 | 91.60011 |
| 58.96 | 84.23504 | 58.96 | 128.65598 | 58.96 | 120.5529 | 58.96 | 91.71605 | 58.96 | 91.21316 |
| 58.98 | 84.00777 | 58.98 | 127.83223 | 58.98 | 121.36548 | 58.98 | 91.99484 | 58.98 | 90.83962 |
| 59 | 85.24449 | 59 | 127.82751 | 59 | 121.54895 | 59 | 90.97803 | 59 | 91.46552 |
| 59.02 | 85.59425 | 59.02 | 128.27543 | 59.02 | 120.85697 | 59.02 | 89.96423 | 59.02 | 91.27827 |
| 59.04 | 85.92117 | 59.04 | 125.90014 | 59.04 | 122.18261 | 59.04 | 88.7964 | 59.04 | 89.79145 |
| 59.06 | 85.37058 | 59.06 | 124.30308 | 59.06 | 124.15152 | 59.06 | 87.34506 | 59.06 | 89.6061 |
| 59.08 | 86.129 | 59.08 | 122.37381 | 59.08 | 124.80668 | 59.08 | 84.79236 | 59.08 | 87.87162 |
| 59.1 | 86.99595 | 59.1 | 121.84738 | 59.1 | 123.43594 | 59.1 | 84.61399 | 59.1 | 87.26289 |
| 59.12 | 86.64524 | 59.12 | 121.98214 | 59.12 | 124.53242 | 59.12 | 83.23966 | 59.12 | 86.28495 |
| 59.14 | 86.3068 | 59.14 | 120.34396 | 59.14 | 125.73949 | 59.14 | 83.46617 | 59.14 | 86.01636 |
| 59.16 | 86.98858 | 59.16 | 120.86189 | 59.16 | 125.41653 | 59.16 | 83.48034 | 59.16 | 84.63694 |
| 59.18 | 86.37833 | 59.18 | 121.25696 | 59.18 | 124.08316 | 59.18 | 86.01266 | 59.18 | 83.90607 |
| 59.2 | 86.29433 | 59.2 | 120.67634 | 59.2 | 124.48106 | 59.2 | 84.56114 | 59.2 | 82.66197 |
| 59.22 | 86.73658 | 59.22 | 118.03775 | 59.22 | 121.34736 | 59.22 | 85.60968 | 59.22 | 81.6663 |
| 59.24 | 86.25318 | 59.24 | 117.75294 | 59.24 | 119.11761 | 59.24 | 86.62972 | 59.24 | 81.81618 |
| 59.26 | 85.33432 | 59.26 | 118.83962 | 59.26 | 118.56834 | 59.26 | 86.05628 | 59.26 | 80.79368 |
| 59.28 | 85.48003 | 59.28 | 119.931 | 59.28 | 120.08462 | 59.28 | 84.32768 | 59.28 | 82.50361 |
| 59.3 | 85.43983 | 59.3 | 120.37441 | 59.3 | 120.08179 | 59.3 | 84.03361 | 59.3 | 83.82713 |
| 59.32 | 83.44166 | 59.32 | 119.19318 | 59.32 | 119.74731 | 59.32 | 82.6304 | 59.32 | 82.7516 |
| 59.34 | 82.60057 | 59.34 | 118.25375 | 59.34 | 118.21897 | 59.34 | 83.98962 | 59.34 | 82.19572 |
| 59.36 | 84.13949 | 59.36 | 115.04379 | 59.36 | 116.95978 | 59.36 | 84.82373 | 59.36 | 84.26278 |
| 59.38 | 85.26543 | 59.38 | 115.36997 | 59.38 | 115.24437 | 59.38 | 85.65237 | 59.38 | 83.77314 |
| 59.4 | 85.74713 | 59.4 | 114.85733 | 59.4 | 116.28025 | 59.4 | 85.90588 | 59.4 | 84.55968 |
| 59.42 | 85.90663 | 59.42 | 114.26615 | 59.42 | 114.95973 | 59.42 | 86.48706 | 59.42 | 83.2484 |
| 59.44 | 84.80789 | 59.44 | 112.78235 | 59.44 | 117.71668 | 59.44 | 86.21734 | 59.44 | 84.79505 |
| 59.46 | 85.21825 | 59.46 | 111.60077 | 59.46 | 118.49303 | 59.46 | 87.77154 | 59.46 | 85.4925 |
| 59.48 | 84.99364 | 59.48 | 114.33036 | 59.48 | 117.78652 | 59.48 | 89.92164 | 59.48 | 87.10579 |
| 59.5 | 84.6167 | 59.5 | 115.02007 | 59.5 | 117.386 | 59.5 | 91.67611 | 59.5 | 89.4943 |
| 59.52 | 85.24652 | 59.52 | 114.84216 | 59.52 | 117.45131 | 59.52 | 91.77411 | 59.52 | 90.08426 |
| 59.54 | 85.91126 | 59.54 | 114.71564 | 59.54 | 117.56126 | 59.54 | 91.84939 | 59.54 | 90.69277 |
| 59.56 | 86.6109 | 59.56 | 114.64052 | 59.56 | 117.71586 | 59.56 | 91.90197 | 59.56 | 91.31982 |
| 59.58 | 87.34546 | 59.58 | 114.61679 | 59.58 | 117.91509 | 59.58 | 91.93183 | 59.58 | 91.96542 |
| 59.6 | 88.11492 | 59.6 | 114.64447 | 59.6 | 118.15897 | 59.6 | 91.93898 | 59.6 | 92.62957 |
| 59.62 | 88.9193 | 59.62 | 114.72355 | 59.62 | 118.44748 | 59.62 | 91.92341 | 59.62 | 93.31225 |
| 59.64 | 89.75858 | 59.64 | 114.85402 | 59.64 | 118.78064 | 59.64 | 91.88514 | 59.64 | 94.01348 |
| 59.66 | 90.63278 | 59.66 | 115.03589 | 59.66 | 119.15845 | 59.66 | 91.82415 | 59.66 | 94.73326 |
| 59.68 | 91.54189 | 59.68 | 115.26917 | 59.68 | 119.58089 | 59.68 | 91.74045 | 59.68 | 95.47158 |
| 59.7 | 92.48591 | 59.7 | 115.55384 | 59.7 | 120.04797 | 59.7 | 91.63404 | 59.7 | 96.22845 |
| 59.72 | 93.46483 | 59.72 | 115.88991 | 59.72 | 120.5597 | 59.72 | 91.50492 | 59.72 | 97.00386 |
| 59.74 | 94.47867 | 59.74 | 116.27737 | 59.74 | 121.11607 | 59.74 | 91.35309 | 59.74 | 97.79781 |
| 59.76 | 95.52742 | 59.76 | 116.71624 | 59.76 | 121.71708 | 59.76 | 91.17855 | 59.76 | 98.61031 |
| 59.78 | 96.61108 | 59.78 | 117.20651 | 59.78 | 122.36273 | 59.78 | 90.98129 | 59.78 | 99.44136 |
| 59.8 | 97.72965 | 59.8 | 117.74817 | 59.8 | 123.05302 | 59.8 | 90.76132 | 59.8 | 100.29095 |
| 59.82 | 98.88314 | 59.82 | 118.34123 | 59.82 | 123.78796 | 59.82 | 90.51864 | 59.82 | 101.15908 |
| 59.84 | 100.07153 | 59.84 | 118.9857 | 59.84 | 124.56754 | 59.84 | 90.25325 | 59.84 | 102.04576 |
| 59.86 | 101.29483 | 59.86 | 119.68156 | 59.86 | 125.39176 | 59.86 | 89.96514 | 59.86 | 102.95098 |
| 59.88 | 102.55304 | 59.88 | 120.42881 | 59.88 | 126.26062 | 59.88 | 89.65433 | 59.88 | 103.87475 |
| 59.9 | 103.84617 | 59.9 | 121.22747 | 59.9 | 127.17412 | 59.9 | 89.3208 | 59.9 | 104.81706 |
| 59.92 | 105.1742 | 59.92 | 122.07753 | 59.92 | 128.13226 | 59.92 | 88.96456 | 59.92 | 105.77791 |
| 59.94 | 106.53714 | 59.94 | 122.97898 | 59.94 | 129.13505 | 59.94 | 88.58561 | 59.94 | 106.75731 |
| 59.96 | 107.935 | 59.96 | 123.93184 | 59.96 | 130.18248 | 59.96 | 88.18395 | 59.96 | 107.75526 |
| 59.98 | 109.36776 | 59.98 | 124.93609 | 59.98 | 131.27455 | 59.98 | 87.75958 | 59.98 | 108.77175 |
| 60 | 110.83544 | 60 | 125.99174 | 60 | 132.41126 | 60 | 87.31249 | 60 | 109.80678 |

Fig.4 Tensile properties of PA6/CeO2 composite fibers with the different concentration of CeO2

| 1 | 2.71879 | 0.13594 |
| --- | --- | --- |
| 2 | 3.37221 | 0.16861 |
| 3 | 4.35038 | 0.21752 |
| 4 | 5.21443 | 0.26072 |
| 5 | 4.82332 | 0.24117 |
| 6 | 4.13956 | 0.20698 |
| 7 | 3.65153 | 0.18258 |

Fig.5 Cell growth measurement on (a) macrophages and (b) osteoblasts of electrospun PA6/ CeO2 nanofibers with different CeO2 concentration of 0 wt.%, 3 wt.%, 5 wt.%, 7 wt.% and 9 wt.%.

（a）

| CeO2 content | 0% | 3% | 5% | 7% | 9% |
| --- | --- | --- | --- | --- | --- |
| 1d | 0.84606 | 0.91404 | 1.11476 | 0.96951 | 0.87027 |
| 2d | 0.9317 | 1.11306 | 1.27393 | 1.11021 | 1.01005 |
| 3d | 0.93358 | 1.2278 | 1.51362 | 1.15432 | 1.09747 |

（b）

| CeO2 content | 0% | 3% | 5% | 7% | 9% |
| --- | --- | --- | --- | --- | --- |
| 1d | 1.07965 | 1.14666 | 1.41538 | 1.31123 | 1.05739 |
| 2d | 1.09653 | 1.17032 | 1.58385 | 1.40116 | 1.10377 |
| 3d | 1.11448 | 1.17922 | 1.6744 | 1.50174 | 1.12644 |
